# Supplementary material
Source: PubMed Central journal article supplement (PMC4332820)
Supplement: NIHMS658497-supplement-Supplement.pdf [file NIHMS658497-supplement-Supplement.pdf]

## SUPPLEMENTAL MATERIAL

|                                                                                                                                      |       |    |
|--------------------------------------------------------------------------------------------------------------------------------------|-------|----|
| <b>Table of Contents</b>                                                                                                             | ..... | 1  |
| <b>I. Supplemental Methods</b>                                                                                                       | ..... | 2  |
| Animal experiments                                                                                                                   |       |    |
| Enzyme-linked immunosorbent assay (ELISA) of serum troponin I                                                                        |       |    |
| RNA preparation                                                                                                                      |       |    |
| Microarray analysis                                                                                                                  |       |    |
| Real-time polymerase chain reaction (PCR)                                                                                            |       |    |
| Bioinformatics and statistics analyses                                                                                               |       |    |
| <b>II. Supplemental Results</b>                                                                                                      | ..... | 7  |
| Two-way supervised analyses of gene expression profiles in TMEV infection                                                            |       |    |
| The lists of differentially expressed genes for each time point                                                                      |       |    |
| Categorization of up- or down-regulated genes                                                                                        |       |    |
| <b>III. Supplemental References</b>                                                                                                  | ..... | 10 |
| <b>IV. Online Tables</b>                                                                                                             |       |    |
| Online Table 1. Gene abbreviations                                                                                                   | ..... | 12 |
| Online Table 2. Gene list of cluster 2                                                                                               | ..... | 14 |
| Online Table 3. Gene list of cluster 8                                                                                               | ..... | 16 |
| Online Table 4. Gene list of cluster 9                                                                                               | ..... | 25 |
| Online Table 5. Gene list of cluster 15                                                                                              | ..... | 27 |
| Online Table 6. Gene list of cluster 19                                                                                              | ..... | 33 |
| Online Table 7. Gene list of cluster 20                                                                                              | ..... | 39 |
| Online Table 8. List of differentially expressed genes on 4 dpi                                                                      | ..... | 45 |
| Online Table 9. List of differentially expressed genes on 7 dpi                                                                      | ..... | 48 |
| Online Table 10. List of differentially expressed genes on 60 dpi                                                                    | ..... | 58 |
| Online Table 11. Top networks identified by IPA of microarray data                                                                   | ..... | 59 |
| Online Table 12. Top toxicity functions (cardiotoxicity)                                                                             | ..... | 60 |
| <b>V. Online Figures</b>                                                                                                             |       |    |
| Online Figure 1. Heat maps of most highly up- or down-regulated genes                                                                | ..... | 61 |
| Online Figure 2. Davies-Bouldin index of <i>k</i> -means clustering                                                                  | ..... | 62 |
| Online Figure 3. The gene expression patterns of 20 clusters                                                                         | ..... | 63 |
| Online Figure 4. Radar chart of expression patterns of cluster center genes                                                          | ..... | 64 |
| Online Figure 5. Correlation between disease activity and PC1 values                                                                 | ..... | 65 |
| Online Figure 6. Correlations between serum troponin I levels and gene expression                                                    | ..... | 66 |
| Online Figure 7. The network associated with ‘Infectious Disease’, ‘Antimicrobial Response’, and ‘Inflammatory Response’             | ..... | 67 |
| Online Figure 8. The network associated with ‘Infectious Disease’, ‘Cellular Function and Maintenance’, and ‘Antimicrobial Response’ | ..... | 68 |
| Online Figure 9. The network associated with ‘Cellular Function and Maintenance’, ‘Inflammatory Response’, and ‘Cellular Movement’   | ..... | 69 |
| Online Figure 10. The top 5 canonical pathways ranked by IPA                                                                         | ..... | 70 |

## **I. Supplemental Methods**

### **Animal experiments**

Male C3H/HeN mice (4-week-old) were purchased from Taconic Farms (Hudson, NY). Mice were maintained on 12/12-hour light/dark cycles in standard animal cages with filter tops under specific pathogen-free conditions in the animal care facility at Louisiana State University Health Sciences Center (LSUHSC)-Shreveport. Mice were given standard laboratory rodent chow and water ad libitum. All experimental procedures involving the use of animals were reviewed and approved by the Institutional Animal Care and Use Committee of LSUHSC and performed according to the criteria outlined by the National Institutes of Health.

We infected 5-week-old mice with  $2 \times 10^7$  plaque forming units (PFUs) of the DA strain of TMEV intraperitoneally. We used age-matched uninfected mice as controls. Mice were monitored and weighed daily for up to 2 months. On 0, 4, 7, 14, 30, and 60 days post infection (dpi), we conducted echocardiography using the Vevo 770 High-Resolution *In Vivo* Micro-Imaging System (VisualSonics, Toronto, Ontario, Canada). We used B- and M-modes of echocardiography to monitor longitudinal morphological and functional changes, without killing mice. On 4, 7, and 60 dpi, we anesthetized five mice per group, using IsoSol<sup>TM</sup> (isoflurane, USP, Vedco, Saint Joseph, MO), and harvested the hearts.

### **Enzyme-linked immunosorbent assay (ELISA) of serum troponin I**

Blood samples were collected from five infected mice by submandibular bleeding<sup>61</sup> on 4, 7, 14, and 30 dpi and the sera were separated by centrifugation. The levels of cardiac troponin I in the sera were measured by ELISA using the Ultra Sensitive Mouse Cardiac Troponin-I ELISA Kit (Life Diagnostics, West Chester, PA), according to the manufacturer's instructions.

### **RNA preparation**

The hearts were homogenized in TRI Reagent<sup>®</sup> (Molecular Research Center, Cincinnati, OH), using the Kinematica Polytron<sup>TM</sup> homogenizer (Kinematica, Bohemia, NY). Total RNA was extracted

from the homogenate, using the RNeasy Mini Kit (Qiagen, Valencia, CA), according to the manufacturer's instructions.<sup>62</sup> DNase treatment was performed during RNA isolation using the RNase-Free DNase Set (Qiagen). All samples were purified to an absorbance ratio (A260/A280) between 1.9 and 2.1. Samples were collected from five infected animals and five age-matched controls at each time point (4, 7, and 60 dpi).

### **Microarray analysis**

We reverse-transcribed 100 ng of total RNA to first-stranded cDNA, using the Poly-A RNA Control (Affymetrix, Santa Clara, CA) and Ambion<sup>®</sup> WT Expression Kit (Life Technologies Corporation, Carlsbad, CA).<sup>62</sup> The double-stranded cDNA was generated from single-stranded cDNA and transcribed *in vitro* into cRNA. The resulting cRNA was purified and 10 µg of purified cRNA was reverse-transcribed into 2<sup>nd</sup>-cycle cDNA. Second-cycle cDNA was fragmented and labeled with terminal deoxynucleotidyl transferase using the Affymetrix proprietary DNA Labeling Reagent (Affymetrix). Labeled cDNA was hybridized to the GeneChip<sup>®</sup> Mouse 1.0ST Array (Affymetrix) that includes 28,853 transcripts. Mouse Gene 1.0ST array contains 50-60 microRNA probe sequences, although it is not designed for microRNA study. Hybridized arrays were washed and stained using the GeneChip<sup>®</sup> Hybridization Wash and Stain Kit (Affymetrix) and Fluidics station 450 (Affymetrix), and scanned using the GeneChip<sup>®</sup> Scanner 3000 (Affymetrix). The data was visualized and quantified by the Affymetrix GeneChip<sup>®</sup> Command Console (AGCC), and normalized by Robust Multi-array Average (RMA), using Expression Console<sup>™</sup> (Affymetrix). Fold changes were calculated as ratios of signal value, compared with the age-matched controls. Log ratios were calculated by the logarithm of fold changes to base 2. Microarray results were filtered by 2-fold cutoff and *P* value threshold.<sup>63</sup> Only transcripts that pass this filter (fold change > 2 and *P* < 0.05) are considered statistically significant. The microarray results were analyzed using the Ingenuity Pathway Analysis<sup>®</sup> (IPA, Ingenuity Systems, [www.ingenuity.com](http://www.ingenuity.com)), NetAffx database (Affymetrix, [www.affymetrix.com/index.affx](http://www.affymetrix.com/index.affx)), and Mouse Genome Informatics (Jackson Laboratory, Bar Harbor, ME, [www.informatics.jax.org/](http://www.informatics.jax.org/)). The data have been deposited into the Gene

Expression Omnibus (GEO) repository in National Center for Biotechnology Information (NCBI) (Accession number: GSE53607). We analyzed samples from five infected animals and five age-matched controls at each time point (4, 7, and 60 dpi) (total 15 infected and 15 control samples).

### **Real-time polymerase chain reaction (PCR)**

We reverse-transcribed 1  $\mu$ g of total RNA into cDNA, using the ImProm-II<sup>TM</sup> Reverse Transcription System (Promega, Madison, WI). Using 50 ng of cDNA, real-time PCR was conducted by the MyiQ<sup>TM</sup>2 Real Time PCR Detection System (Bio-Rad, Hercules, CA). Primer sets of *Cxcl9*, *Tlr3*, *Gzmb*, *Cd3g*, *Mmp12*, *Gpnmb*, and *Gapd* were purchased from RealTimePrimers.com (Elkins Park, PA). VP2 capsid protein of TMEV was used to detect the viral RNA in heart tissue samples. The primer sequences of VP2 are as follows: forward; 5'-TGGTCGACTCTGTGGTTACG-3' and reverse; 5'-GCCGGTCTTGCAAAGATAGT-3'.<sup>64</sup> The results were normalized using a housekeeping gene *Gapd*. The expression of housekeeping gene *Gapd* did not change with the stages of viral infection (data not shown). Fold changes were calculated by the  $\Delta\Delta$ Ct method. We analyzed samples from five infected animals and five age-matched controls at each time point (4, 7, and 60 dpi) (total 15 infected and 15 control samples).

### **Bioinformatics and statistics analyses**

**Volcano plot.** We drew a volcano plot, using the OriginPro 8.1 (OriginLab Corporation, Northampton, MA), to assess significance together with log ratio of transcriptome data.<sup>65-67</sup> In the volcano plot, log ratios of gene expression in the heart of TMEV-infected mice compared with control mice were used as the x-axis and the logarithms of *P* values to base 10 were used as the y-axis.

**Heat map.** Heat maps were drawn to determine the expression patterns of top 20 up- or downregulated genes at each time point and compare the expression levels with the other time points, using R version 2.15.1 and the R packages 'gplots' and 'genefilter'.<sup>68</sup>

***K-means clustering.*** To find the differences of gene expression profiles between the time points, we conducted *k*-means clustering using an R package ‘cclust’. We used Davies-Bouldin index<sup>69</sup> to determine the optimum number of clusters and obtained the lowest score (0.51) when microarray data were separated into 20 clusters (Online Figure 2). Graphs were drawn using 240 genes (top 80, middle 80, and bottom 80 genes) in each cluster. Radar chart was drawn using the expression patterns of cluster center genes.

***IPA.*** To classify the genes functionally, we used IPA where we entered the genes whose fold changes were more than 2-fold and *P* values were less than 0.05. IPA shows possible networks involved in microarray profiles by the IPA Network Generation Algorithm.<sup>70</sup> Genes were clustered and classified by the IPA Network Generation algorithm and the networks were ranked by the network score. The network score was calculated based on the right-tailed Fisher’s Exact Test that takes into account: 1) the number of Network Eligible molecules in the network, 2) size of the network, 3) the total number of Network Eligible molecules in the given dataset, and 4) the number of molecules in the IPA database that could potentially be included in the networks.<sup>71,72</sup> In the networks, solid and dashed lines indicated direct and indirect interactions, respectively. Direct interactions require the two molecules make direct physical contact with each other; there is no intermediate step. Indirect interactions do not require that there is physical contact between the two molecules, such as a signaling cascade instead of the two molecules making physical contact with each other.

***PCA.*** PCA can reduce the dimensionality of a data set (e.g. microarray data) consisting of a large number of interrelated variables, while retaining as much as possible of the variation present in the data set.<sup>73</sup> PCA was conducted as an “unsupervised” analysis to clarify the variance among microarray data from heart samples using R. To clarify the variances among samples, microarray data were calculated using a Q-mode PCA package ‘prcomp’ of R. The proportion of variance and factor loading were also calculated.

***Statistics.*** The data were showed as mean + standard error of the mean (SEM). Statistical comparisons were conducted using Student *t* test or analysis of variance (ANOVA) in the OriginPro 8.1.

$P < 0.05$  was considered as significant difference. Correlation analysis was conducted using the Microsoft Excel (Microsoft Corporation, Redmond, WA).

## II. Supplemental Results

### *Two-way supervised analyses of gene expression profiles in TMEV infection*

Among the downregulated genes in the volcano plots (Figure 4), we were able to identify 16 genes on 4 dpi, 7 genes on 7 dpi, and 4 genes on 60 dpi. The expression levels of these downregulated genes together with top 20 upregulated genes at each phase were visualized using heat maps: Online Figure 1A, 20 upregulated and 16 downregulated genes on 4 dpi; Online Figure 1B, 20 upregulated and 7 downregulated genes on 7 dpi; Online Figure 1C, 20 upregulated and 4 downregulated genes on 60 dpi. These gene expression patterns in each time point were compared with those at the other two time points.

On 4 dpi, interferon (IFN)-induced genes, such as IFN regulatory factor 7 (*Irf7*), IFN-induced protein with tetratricopeptide repeats (*Ifit1* and *Ifit3*), and IFN- $\gamma$  induced GTPase (*Igtp*), were upregulated significantly (Online Figure 1A). In contrast, myosin, light polypeptide 7, regulatory (*Myl7*), myosin binding protein H-like (*Mybphl*), and microRNA 690 (*Mir690*) were downregulated.

On 7 dpi, similar to 4 dpi, IFN-induced genes, including chemokine (C-X-C motif) ligand 9 (*Cxcl9*) and *Igtp*, were upregulated. In addition, granzyme B (*Gzmb*), natural killer cell group 7 sequence (*Nkg7*), and CD274 antigen (*Cd274*) were also upregulated significantly (Online Figure 1B). All top 20 upregulated genes on 4 dpi, which were associated with innate immune responses, were also upregulated on 7 dpi. On the other hand, angiopoietin-like 7 (*Angptl7*), Ras association (RalGDS/AF-6) domain family (N-terminal) member 9 (*Rassf9*), and methyltransferase like 21E (*Mettl21e*) were downregulated on 7 dpi.

On 60 dpi, we found significant upregulation of genes associated with cardiac remodeling and fibrosis, such as matrix metalloproteinase 12 (*Mmp12*), glycoprotein (transmembrane) nmb (*Gpnmb*, osteoactivin), and secreted phosphoprotein 1 (*Spp1*, osteopontin) (Online Figure 1C). Although this suggested that cardiac remodeling was active on 60 dpi, these genes were also upregulated on 7 dpi. We also found upregulation of immunoglobulins (*Igkv10-96*, *Igkv1-43*, and *Igj*), complement component (C1s), CD74 antigen (*Cd74*), and MHC class II-related antigens (*H2-Ea-ps* and *H2-Aa*). Although this indicated that acquired immune responses associated with B cells were present on 60 dpi, most of the

genes were also upregulated on 7 dpi, thus their expression on the heat map did not distinguish between 7 and 60 dpi. On the other hand, downregulations of nuclear receptor subfamily 4, group A, member 3 (*Nr4a3*), leucine rich repeat containing 52 (*Lrrc52*), and a disintegrin-like and metallopeptidase (reprolysin type) with thrombospondin type 1 motif, 9 (*Adamts9*) were shown in the hearts of infected mice.

Thus, although the heat maps of significantly expressed genes between 4 and 60 dpi showed distinct patterns, the heat maps did not show different patterns between 4 and 7 dpi as well as 7 and 60 dpi. This could be due to the upregulation of many genes associated with innate immunity, acquired immunity, and cardiac remodeling on 7 dpi.

#### ***The lists of differentially expressed genes for each time point***

Up- or downregulated genes in the hearts of TMEV-infected mice at each time point were listed in Online Tables 8 to 10. Red background indicates upregulation and blue indicates downregulation at each time point.

#### ***Categorization of up- or down-regulated genes in the hearts of TMEV-infected mice***

To categorize genes that were up- or down-regulated in the hearts of TMEV-infected mice by function, we uploaded the microarray results into the IPA that shows possible networks involved in microarray profiles by IPA Network Generation Algorithm (Online Table 11). On 4 dpi, the top network was associated with ‘Infectious Disease’, ‘Antimicrobial Response’, and ‘Inflammatory Response’. This network was composed of IFN- $\alpha/\beta$ -related genes (Online Figure 7). On 7 dpi, the top network was associated with ‘Infectious Disease’, ‘Cellular Function and Maintenance’, and ‘Antimicrobial Response’. This network was composed of pattern recognition receptors and interleukin 6- and 12-associated genes (Online Figure 8). On 60 dpi, the top networks were ‘Cellular Function and Maintenance’, ‘Inflammatory Response’, and ‘Cellular Movement’, composed of remodeling- and immune response-related genes (Online Figure 9). Remodeling-related genes [*Mmp12*, *Spp1*, and cytochrome b-245, beta polypeptide



(*Cybb*)] were included in the network. The network associated with ‘Antimicrobial Responses’ was listed on both 4 and 7 dpi, but not on 60 dpi. The network associated with ‘Cellular Function and Maintenance’ was listed on both 7 and 60 dpi. These networks shown in Online Figures 7-9 included both direct (solid lines) and indirect interactions (dashed lines). Thus, we conducted IPA using only direct interactions. Significant networks identified allowing only for direct connections were as follows: the top network on 4 dpi was associated with ‘Endocrine System Disorders’, ‘Gastrointestinal Disease’, and ‘Immunological Disease’; the top network on 7 dpi was associated with ‘Hematological System Development and Function’, ‘Tissue Morphology’, and ‘Cellular Movement’; the top network on 60 dpi was not connected well among up- or down-regulated genes. While IPA using only direct interaction is supposed to be stringent, identified networks contained pathways irrelevant to our myocarditis models, including ‘Endocrine System Disorders’, ‘Gastrointestinal Disease’ and ‘Hematological System Development and Function’.

Using IPA, we also ranked the top five canonical pathways involved in each time point (Online Figure 10). Among the pathways, the top two highly induced pathways in each phase were as follows: on 4 dpi, the pathways associated with ‘Activation of IFN Regulatory Factor by Cytosolic Pattern Recognition Receptors’ and ‘IFN Signaling’; on 7 dpi, the ‘Antigen Presenting Pathway’ and a pathway associated with ‘Communication Between Innate and Adaptive Immune Cells’; and on 60 dpi, the ‘B Cell Development Pathway’ and ‘Antigen Presenting Pathway’.

IPA also showed upregulated genes that could be associated with cardiotoxicity (Online Table 12). Cardiac inflammation was listed as the top toxicity function on both 4 and 7 dpi, where chemokines (*Ccl13*, *Ccl2*, and *Ccl311*), toll-like receptor (*Tlr3*), and IFN- $\gamma$  (*Ifng*) were upregulated. Cardiac necrosis, dysfunction, and dilation were listed on 7 and 60 dpi because of upregulation of *Cybb* and *Spp1*. These results suggested the presence of inflammation in the heart on both 4 and 7 dpi and cardiac dysfunction and dilation on 7 and 60 dpi. Thus, the categorization of the genes based on supervised analyses showed involvement of different pathways in each phase to some extent. However, this approach did not identify molecules that can be used to distinguish between the different phases.

### III. Supplemental References

61. Golde WT, Gollobin P, Rodriguez LL. A rapid, simple, and humane method for submandibular bleeding of mice using a lancet. *Lab Anim (NY)*. 2005;34:39-43.
62. Omura S, Koike E, Kobayashi T. Microarray analysis of gene expression in rat alveolar epithelial cells exposed to fractionated organic extracts of diesel exhaust particles. *Toxicology*. 2009;262:65-72.
63. Vacha SJ. Pitfall 7: Paying more attention to the magnitude of the log ratio than significance of the log ratio. *Ten Pitfalls of Microarray Analysis. Agilent in Life Sciences*.
64. Deb C, Lafrance-Corey RG, Zoecklein L, Papke L, Rodriguez M, Howe CL. Demyelinated axons and motor function are protected by genetic deletion of perforin in a mouse model of multiple sclerosis. *J Neuropathol Exp Neurol*. 2009;68:1037-1048.
65. Li WT. Volcano Plots in Analyzing Differential Expressions with Mrna Microarrays. *Journal of Bioinformatics and Computational Biology*. 2012;10.
66. Chen JJ, Wang SJ, Tsai CA, Lin CJ. Selection of differentially expressed genes in microarray data analysis. *Pharmacogenomics J*. 2007;7:212-220.
67. Oberg AL, Mahoney DW, Eckel-Passow JE, Malone CJ, Wolfinger RD, Hill EG, et al. Statistical analysis of relative labeled mass spectrometry data from complex samples using ANOVA. *J Proteome Res*. 2008;7:225-233.
68. R Core Team (2012) R: A language and environment for statistical computing. R Foundation for Statistical Computing, Vienna, Austria. ISBN 3-900051-07-0, URL <http://www.R-project.org/>.
69. Davies DL, Bouldin DW. A cluster separation measure. *IEEE Trans Pattern Anal Mach Intell*. 1979;1:224-227.
70. Savli H, Szendroi A, Romics I, Nagy B. Gene network and canonical pathway analysis in prostate cancer: a microarray study. *Exp Mol Med*. 2008;40:176-185.

71. Naito Y, Kuroda M, Mizushima K, Takagi T, Handa O, Kokura S, et al. Transcriptome Analysis for Cytoprotective Actions of Rebamipide against Indomethacin-Induced Gastric Mucosal Injury in Rats. *J Clin Biochem Nutr.* 2007;41:202-210.
72. Kaveh F, Edvardsen H, Borresen-Dale AL, V NK, Solvang HK. Allele-specific disparity in breast cancer. *BMC Med Genomics.* 2011;4:85.
73. Jolliffe IT. Principal Component Analysis, Second Edition. New York: Springer. *Briefings in bioinformatics.* 2011;12:714-722.

## IV. Online Tables

**Online Table 1. Gene abbreviations**

| <b>Gene symbol</b> | <b>Gene name</b>                                                                                      |
|--------------------|-------------------------------------------------------------------------------------------------------|
| <i>Adamts8</i>     | a disintegrin-like and metallopeptidase (reprolysin type) with thrombospondin type 1 motif, 8         |
| <i>Adamts9</i>     | a disintegrin-like and metallopeptidase (reprolysin type) with thrombospondin type 1 motif, 9         |
| <i>Angptl7</i>     | angiopoietin-like 7                                                                                   |
| <i>Atp6v0d2</i>    | ATPase, H <sup>+</sup> transporting, lysosomal V0 subunit D2                                          |
| <i>Bmp10</i>       | bone morphogenetic protein 10 (TGF $\beta$ family)                                                    |
| <i>C1s</i>         | complement component 1, s subcomponent                                                                |
| <i>Car3</i>        | carbonic anhydrase 3                                                                                  |
| <i>Casp1</i>       | caspace 1                                                                                             |
| <i>Ccl2</i>        | chemokine (C-C motif) ligand 2                                                                        |
| <i>Ccl3</i>        | chemokine (C-C motif) ligand 3                                                                        |
| <i>Ccl5</i>        | chemokine (C-C motif) ligand 5                                                                        |
| <i>Ccl8</i>        | chemokine (C-C motif) ligand 8                                                                        |
| <i>Ccna2</i>       | cyclin A2                                                                                             |
| <i>Ccr5</i>        | chemokine (C-C motif) receptor 5                                                                      |
| <i>Cd274</i>       | CD274 antigen (B7-H1, PD-L1)                                                                          |
| <i>Cd3d</i>        | CD3 antigen, $\delta$ polypeptide                                                                     |
| <i>Cd3e</i>        | CD3 antigen, $\epsilon$ polypeptide                                                                   |
| <i>Cd3g</i>        | CD3 antigen, $\gamma$ polypeptide                                                                     |
| <i>Cd74</i>        | CD74 antigen (invariant polypeptide of major histocompatibility complex, class II antigen-associated) |
| <i>Cfd</i>         | complement factor D (adipsin)                                                                         |
| <i>Clec7a</i>      | C-type lectin domain family 7, member a                                                               |
| <i>Ctsk</i>        | cathepsin K                                                                                           |
| <i>Cxcl9</i>       | chemokine (C-X-C motif) ligand 9 (Mig)                                                                |
| <i>Cybb</i>        | cytochrome b-245, beta polypeptide (Nox2)                                                             |
| <i>Cyp2e1</i>      | cytochrome P450, family 2, subfamily e, polypeptide 1                                                 |
| <i>Ddx58</i>       | DEAD (Asp-Glu-Ala-Asp) box polypeptide 58 (RIG-I)                                                     |
| <i>Dhx58</i>       | DEXH (Asp-Glu-X-His) box polypeptide 58 (LGP2)                                                        |
| <i>Dkk3</i>        | dickkopf homolog 3 ( <i>Xenopus laevis</i> )                                                          |
| <i>Elovl3</i>      | elongation of very long chain fatty acids (FEN1/Elo2, SUR4/Elo3, yeast)-like 3                        |
| <i>Fam107a</i>     | family with sequence similarity 107, member A                                                         |
| <i>Fasn</i>        | fatty acid synthase                                                                                   |
| <i>Fcer1g</i>      | Fc receptor, IgE, high affinity I, $\gamma$ polypeptide                                               |
| <i>Fgf12</i>       | fibroblast growth factor 12                                                                           |
| <i>Gapd</i>        | glyceraldehyde-3-phosphate dehydrogenase                                                              |
| <i>Gbp11</i>       | guanylate binding protein 11                                                                          |
| <i>Gbp2b</i>       | guanylate binding protein 2b                                                                          |
| <i>Gbp3</i>        | guanylate binding protein 3                                                                           |
| <i>Glipr1</i>      | GLI pathogenesis-related 1 (glioma)                                                                   |
| <i>GpnmB</i>       | glycoprotein (transmembrane) nmb (osteoactivin)                                                       |
| <i>Gzmb</i>        | granzyme B                                                                                            |
| <i>H2-Aa</i>       | major histocompatibility 2, class II antigen A, $\alpha$                                              |
| <i>H2-Ab1</i>      | major histocompatibility 2, class II antigen A, $\beta$ 1                                             |
| <i>H2-Ea-ps</i>    | major histocompatibility 2, class II antigen E $\alpha$ , pseudogene                                  |
| <i>Hamp</i>        | hepcidin antimicrobial peptide                                                                        |
| <i>Hp</i>          | haptoglobin                                                                                           |
| <i>Ifi44</i>       | interferon-induced protein 44                                                                         |
| <i>Ifi44l</i>      | interferon-induced protein 44 like                                                                    |
| <i>Ifih1</i>       | interferon induced with helicase C domain 1 (MDA5)                                                    |
| <i>Ifit1</i>       | interferon-induced protein with tetratricopeptide repeats 1                                           |
| <i>Ifit2</i>       | interferon-induced protein with tetratricopeptide repeats 2                                           |
| <i>Ifit3</i>       | interferon-induced protein with tetratricopeptide repeats 3                                           |
| <i>Ighv1-43</i>    | immunoglobulin heavy variable V1-43                                                                   |
| <i>Ighv1-61</i>    | immunoglobulin heavy variable 1-61                                                                    |
| <i>Igj</i>         | immunoglobulin joining chain                                                                          |
| <i>Igkv10-96</i>   | immunoglobulin $\kappa$ variable 10-96                                                                |

|                 |                                                                               |
|-----------------|-------------------------------------------------------------------------------|
| <i>Igkv6-32</i> | immunoglobulin $\kappa$ variable 6-32                                         |
| <i>Igtp</i>     | interferon $\gamma$ induced GTPase                                            |
| <i>ligp1</i>    | interferon inducible GTPase 1                                                 |
| <i>Il1b</i>     | interleukin 1 $\beta$                                                         |
| <i>Il1rn</i>    | interleukin 1 receptor antagonist                                             |
| <i>Il6</i>      | interleukin 6                                                                 |
| <i>Inmt</i>     | indolethylamine N-methyltransferase                                           |
| <i>Irf7</i>     | interferon regulatory factor 7                                                |
| <i>Irgm1</i>    | immunity-related GTPase family M member 1                                     |
| <i>Itgal</i>    | integrin $\alpha$ L                                                           |
| <i>Itgam</i>    | integrin $\alpha$ M                                                           |
| <i>Itgax</i>    | integrin $\alpha$ X                                                           |
| <i>Itgb2</i>    | integrin $\beta$ 2                                                            |
| <i>Lck</i>      | lymphocyte protein tyrosine kinase                                            |
| <i>Lcn2</i>     | lipocalin 2                                                                   |
| <i>Lgals3</i>   | lectin, galactose binding, soluble 3                                          |
| <i>Lgi1</i>     | leucine-rich repeat LGI family, member 1                                      |
| <i>Lrrc52</i>   | leucine rich repeat containing 52                                             |
| <i>Mavs</i>     | mitochondrial antiviral signaling protein                                     |
| <i>Mettl21e</i> | methyltransferase like 21E                                                    |
| <i>Mir690</i>   | microRNA 690                                                                  |
| <i>Mmp12</i>    | matrix metalloproteinase 12                                                   |
| <i>Ms4a4c</i>   | membrane-spanning 4-domains, subfamily A, member 4C                           |
| <i>Mybphl</i>   | myosin binding protein H-like                                                 |
| <i>My17</i>     | myosin, light polypeptide 7, regulatory                                       |
| <i>Nkg7</i>     | natural killer cell group 7 sequence                                          |
| <i>Nr4a3</i>    | nuclear receptor subfamily 4, group A, member 3                               |
| <i>Pah</i>      | phenylalanine hydroxylase                                                     |
| <i>Penk</i>     | preproenkephalin                                                              |
| <i>Pfkfb1</i>   | 6-phosphofructo-2-kinase/fructose-2,6-biphosphatase 1                         |
| <i>Phf11d</i>   | PHD finger protein 11D                                                        |
| <i>Pkhd11l</i>  | polycystic kidney and hepatic disease 1-like 1                                |
| <i>Plac8</i>    | placenta-specific 8                                                           |
| <i>Plau</i>     | plasminogen activator, urokinase                                              |
| <i>Ppargc1a</i> | peroxisome proliferative activated receptor $\gamma$ , coactivator 1 $\alpha$ |
| <i>Prfl</i>     | perforin 1 (pore forming protein)                                             |
| <i>Pyhin1</i>   | pyrin and HIN domain family, member 1                                         |
| <i>Rassf9</i>   | Ras association (RalGDS/AF-6) domain family (N-terminal) member 9             |
| <i>Retla</i>    | resistin like $\alpha$                                                        |
| <i>Rsad2</i>    | radical S-adenosyl methionine domain containing 2                             |
| <i>Sln</i>      | sarcolipin                                                                    |
| <i>Sox7</i>     | SRY-box containing gene 7                                                     |
| <i>Spp1</i>     | secreted phosphoprotein 1 (osteopontin)                                       |
| <i>Sprr1a</i>   | small proline-rich protein 1A                                                 |
| <i>Stap1</i>    | signal transducing adaptor family member 1                                    |
| <i>Stard10</i>  | START domain containing 10                                                    |
| <i>Stat1</i>    | signal transducer and activator of transcription 1                            |
| <i>Stat4</i>    | signal transducer and activator of transcription 4                            |
| <i>Tgtp1</i>    | T cell specific GTPase 1                                                      |
| <i>Timpl</i>    | tissue inhibitor of metalloproteinase 1                                       |
| <i>Tlr3</i>     | toll-like receptor 3                                                          |
| <i>Tlr7</i>     | toll-like receptor 7                                                          |
| <i>Tnfaip3</i>  | tumor necrosis factor, $\alpha$ -induced protein 3                            |
| <i>Tnfsf10</i>  | tumor necrosis factor (ligand) superfamily, member 10                         |
| <i>Usp18</i>    | ubiquitin specific peptidase 18                                               |

---

**Online Table 2. Gene list of cluster 2**

| Cluster | Probe Set ID | Day 4      | Day 7      | Day 60    | Symbol      | Entrez Gene Name                                                                          |
|---------|--------------|------------|------------|-----------|-------------|-------------------------------------------------------------------------------------------|
| 2       | 10583056     | -0.0392816 | 0.241738   | 3.4960326 | MMP12       | matrix metalloproteinase 12 (macrophage elastase)                                         |
| 2       | 10538187     | -0.066586  | 1.2876936  | 3.1650604 | GPNMB       | glycoprotein (transmembrane) nmb                                                          |
| 2       | 10511779     | 0.2294848  | 0.3602788  | 2.9750388 | ATP6V0D2    | ATPase, H+ transporting, lysosomal 38kDa, V0 subunit d2                                   |
| 2       | 10545237     | -0.1361568 | -0.067529  | 2.0623402 |             |                                                                                           |
| 2       | 10545175     | -0.052077  | 0.9486478  | 1.7071394 | Igk-J1      | immunoglobulin kappa joining 1                                                            |
| 2       | 10547740     | 1.4358614  | 0.2003274  | 1.6863684 | C1S         | complement component 1, s subcomponent                                                    |
| 2       | 10545173     | -0.095812  | 0.6494674  | 1.5954512 | Igk         | immunoglobulin kappa chain complex                                                        |
| 2       | 10494262     | -0.3787916 | 0.1369422  | 1.5008528 | CTSK        | cathepsin K                                                                               |
| 2       | 10538882     | -0.1900148 | -0.006567  | 1.4665974 |             |                                                                                           |
| 2       | 10403021     | 0.1299884  | 0.3088364  | 1.3770836 |             |                                                                                           |
| 2       | 10531126     | -0.2783984 | 0.5021218  | 1.3460858 | IGJ         | immunoglobulin J polypeptide, linker protein for immunoglobulin alpha and mu polypeptides |
| 2       | 10338640     | 0.9966784  | -0.32691   | 1.3380414 |             |                                                                                           |
| 2       | 10557895     | 0.0705552  | 1.280888   | 1.3302184 | ITGAX       | integrin, alpha X (complement component 3 receptor 4 subunit)                             |
| 2       | 10403038     | -0.1089806 | 0.4155     | 1.1938834 |             |                                                                                           |
| 2       | 10548375     | -0.011575  | 1.052778   | 1.1820744 | CLEC7A      | C-type lectin domain family 7, member A                                                   |
| 2       | 10403069     | -0.2337452 | 0.1563804  | 1.1816562 | IGHM        | immunoglobulin heavy constant mu                                                          |
| 2       | 10338365     | 0.1495842  | 0.4229512  | 1.1044422 |             |                                                                                           |
| 2       | 10545247     | 0.2576838  | 0.3979584  | 1.0589932 | Igkv6-15    | immunoglobulin kappa variable 6-14                                                        |
| 2       | 10545198     | -0.2593444 | 0.0025162  | 1.0287108 |             |                                                                                           |
| 2       | 10341488     | -0.085396  | 0.3632384  | 0.98846   |             |                                                                                           |
| 2       | 10523128     | -0.2019334 | 0.4205996  | 0.9853106 | PPBP        | pro-platelet basic protein (chemokine (C-X-C motif) ligand 7)                             |
| 2       | 10339525     | 0.0073388  | 0.1754834  | 0.9570168 |             |                                                                                           |
| 2       | 10545215     | 0.0340812  | 0.0750176  | 0.8951984 | Igk-V28     | immunoglobulin kappa chain variable 28 (V28)                                              |
| 2       | 10403018     | -0.1739206 | 0.2330356  | 0.8843548 | AI324046    | expressed sequence AI324046                                                               |
| 2       | 10339025     | -0.1649434 | 0.0354696  | 0.8558128 |             |                                                                                           |
| 2       | 10523359     | -0.7706774 | 0.0794764  | 0.851305  | CXCL13      | chemokine (C-X-C motif) ligand 13                                                         |
| 2       | 10339941     | -0.1160354 | 0.0745046  | 0.8334982 |             |                                                                                           |
| 2       | 10538921     | -0.1330676 | 0.4694028  | 0.828054  |             |                                                                                           |
| 2       | 10343595     | 0.0891906  | -0.2639426 | 0.8266714 |             |                                                                                           |
| 2       | 10341654     | -0.7300586 | 0.475328   | 0.821276  |             |                                                                                           |
| 2       | 10339870     | 0.0483848  | 0.2322026  | 0.8127254 |             |                                                                                           |
| 2       | 10545190     | 0.300976   | 0.1443338  | 0.8058268 |             |                                                                                           |
| 2       | 10538903     | -0.1147284 | 0.3407664  | 0.8052908 | Igkv8-30    | immunoglobulin kappa chain variable 28 (V28)                                              |
| 2       | 10403028     | -0.1004406 | 0.4395714  | 0.7976784 |             |                                                                                           |
| 2       | 10343187     | 0.5628796  | 0.665346   | 0.794683  |             |                                                                                           |
| 2       | 10358421     | -0.1254366 | 0.6664756  | 0.789772  | RGS18       | regulator of G-protein signaling 18                                                       |
| 2       | 10545184     | -0.0250938 | 0.0930944  | 0.7864136 |             |                                                                                           |
| 2       | 10545862     | -0.2290526 | -0.1370138 | 0.7836834 | Cml3/Gm4477 | camello-like 3                                                                            |
| 2       | 10403015     | 0.1046814  | 0.1404718  | 0.7698862 | AI324046    | expressed sequence AI324046                                                               |
| 2       | 10419934     | 0.0568668  | 0.3467786  | 0.7662178 | MYH7        | myosin, heavy chain 7, cardiac muscle, beta                                               |
| 2       | 10591739     | -0.2079734 | 0.6678674  | 0.7590626 | ACP5        | acid phosphatase 5, tartrate resistant                                                    |
| 2       | 10350473     | -0.0225758 | 0.0532318  | 0.750761  | B3GALT2     | UDP-Gal:betaGlcNAc beta 1,3-galactosyltransferase, polypeptide 2                          |
| 2       | 10492798     | -0.2841524 | 0.0995462  | 0.7417692 | SFRP2       | secreted frizzled-related protein 2                                                       |
| 2       | 10341453     | 0.610481   | 0.349168   | 0.7381912 |             |                                                                                           |
| 2       | 10545869     | -0.2882584 | -0.0452272 | 0.7361532 | Cml3/Gm4477 | camello-like 3                                                                            |
| 2       | 10341089     | -0.0412908 | 0.1667672  | 0.7333504 |             |                                                                                           |
| 2       | 10338976     | 0.191292   | 0.138382   | 0.7246336 |             |                                                                                           |
| 2       | 10338165     | -0.3136412 | -0.1215916 | 0.7232488 |             |                                                                                           |
| 2       | 10564818     | -0.323219  | 0.3850666  | 0.7192478 | ANPEP       | alanyl (membrane) aminopeptidase                                                          |
| 2       | 10341001     | -0.2865824 | 0.1558054  | 0.7161202 |             |                                                                                           |
| 2       | 10340173     | -0.4694412 | -0.095255  | 0.7027516 |             |                                                                                           |
| 2       | 10545865     | -0.1828148 | -0.1209574 | 0.6947052 | Cml3/Gm4477 | camello-like 3                                                                            |
| 2       | 10545196     | -0.205896  | 0.0505448  | 0.693595  |             |                                                                                           |
| 2       | 10339305     | -0.0885026 | 0.077951   | 0.6852978 |             |                                                                                           |
| 2       | 10343889     | -0.1562914 | 0.5248406  | 0.6834124 |             |                                                                                           |
| 2       | 10462442     | 0.111467   | 0.6132776  | 0.6746374 | IL33        | interleukin 33                                                                            |
| 2       | 10341243     | -0.3177444 | 0.0417542  | 0.6704908 |             |                                                                                           |
| 2       | 10340884     | -0.227121  | -0.1288554 | 0.6631158 |             |                                                                                           |
| 2       | 10445781     | -0.0277506 | 0.1798908  | 0.661405  | TREM2       | triggering receptor expressed on myeloid cells 2                                          |
| 2       | 10339171     | -0.425703  | 0.6999032  | 0.6598412 |             |                                                                                           |
| 2       | 10340594     | -0.283164  | -0.0585778 | 0.656075  |             |                                                                                           |
| 2       | 10342563     | -0.0007634 | -0.001319  | 0.655842  |             |                                                                                           |
| 2       | 10395273     | 0.0007438  | 0.5410032  | 0.645488  | Gdap10      | ganglioside-induced differentiation-associated-protein 10                                 |
| 2       | 10343700     | -0.171202  | 0.246582   | 0.6445726 |             |                                                                                           |
| 2       | 10435043     | 0.0218306  | 0.4911668  | 0.6433614 | TM4SF19     | transmembrane 4 L six family member 19                                                    |
| 2       | 10403048     | -0.056381  | 0.3094678  | 0.6390022 |             |                                                                                           |
| 2       | 10504127     | 0.292127   | 0.3561266  | 0.6327726 | CCL21       | chemokine (C-C motif) ligand 21                                                           |
| 2       | 10504154     | 0.292127   | 0.3561266  | 0.6327726 | CCL21       | chemokine (C-C motif) ligand 21                                                           |
| 2       | 10504183     | 0.292127   | 0.3561266  | 0.6327726 | CCL21       | chemokine (C-C motif) ligand 21                                                           |
| 2       | 10512377     | 0.292127   | 0.3561266  | 0.6327726 | CCL21       | chemokine (C-C motif) ligand 21                                                           |
| 2       | 10338332     | -0.1862604 | 0.0724472  | 0.626833  |             |                                                                                           |
| 2       | 10545205     | -0.0629944 | 0.3353452  | 0.6266194 | Gm1418      | immunoglobulin kappa variable 4-57-1                                                      |
| 2       | 10339626     | 0.2172436  | 0.3965274  | 0.6230718 |             |                                                                                           |
| 2       | 10545187     | -0.064152  | 0.093604   | 0.61922   | Gm1502      | predicted gene 1502                                                                       |
| 2       | 10340840     | 0.1259392  | -0.0043936 | 0.612312  |             |                                                                                           |
| 2       | 10341148     | -0.4386734 | 0.264262   | 0.61065   |             |                                                                                           |
| 2       | 10340070     | 0.2296546  | 0.5199256  | 0.6095988 |             |                                                                                           |
| 2       | 10419568     | -0.1874534 | 0.0152962  | 0.6027982 | RNASE2      | ribonuclease, RNase A family, 2 (liver, eosinophil-derived neurotoxin)                    |
| 2       | 10370000     | -0.1777124 | 0.1178444  | 0.5985182 | GSTT1       | glutathione S-transferase theta 1                                                         |
| 2       | 10339622     | -0.4800984 | 0.3703308  | 0.5949622 |             |                                                                                           |
| 2       | 10343323     | -0.150792  | -0.0271844 | 0.5918356 |             |                                                                                           |

|   |          |            |           |           |               |                                                         |
|---|----------|------------|-----------|-----------|---------------|---------------------------------------------------------|
| 2 | 10342102 | 0.269756   | 0.183977  | 0.591503  |               |                                                         |
| 2 | 10538880 | -0.0375536 | 0.205469  | 0.5838978 |               |                                                         |
| 2 | 10338872 | -0.254688  | 0.0788602 | 0.5835852 |               |                                                         |
| 2 | 10519998 | -0.4282306 | 0.0257682 | 0.5796416 | LRRC17        | leucine rich repeat containing 17                       |
| 2 | 10338676 | -0.2461476 | 0.4030146 | 0.5773306 |               |                                                         |
| 2 | 10547752 | 0.5518134  | 0.3649818 | 0.5760028 | C1S           | complement component 1, s subcomponent                  |
| 2 | 10342867 | 0.0706604  | 0.2041016 | 0.5743686 |               |                                                         |
| 2 | 10342275 | -0.0165772 | 0.3326464 | 0.5719828 |               |                                                         |
| 2 | 10450369 | 0.2145322  | 0.2540182 | 0.5716578 | HSPA1A/HSPA1B | heat shock 70kDa protein 1A                             |
| 2 | 10557175 | -0.2737868 | 0.0926244 | 0.571169  |               |                                                         |
| 2 | 10403060 | -0.0087198 | 0.2787722 | 0.5635208 |               |                                                         |
| 2 | 10343820 | -0.2387554 | 0.0591568 | 0.5547106 |               |                                                         |
| 2 | 10341259 | -0.4340426 | 0.2240006 | 0.5542188 |               |                                                         |
| 2 | 10339130 | 0.0752054  | 0.0929756 | 0.54716   |               |                                                         |
| 2 | 10358597 | -0.2788662 | 0.0270332 | 0.5450396 | Hmcn1         | hemicentin 1                                            |
| 2 | 10340963 | -0.0122214 | 0.0185678 | 0.5443816 |               |                                                         |
| 2 | 10339636 | -0.1617256 | 0.0688568 | 0.5440882 |               |                                                         |
| 2 | 10341138 | -0.0730652 | 0.0999904 | 0.5347006 |               |                                                         |
| 2 | 10403054 | 0.0251384  | 0.1963096 | 0.5334576 | LOC435333     | similar to monoclonal antibody heavy chain              |
| 2 | 10342411 | -0.1360698 | 0.094731  | 0.5318112 |               |                                                         |
| 2 | 10514275 | -0.3487288 | 0.4313314 | 0.5248414 | PTPLAD2       | protein tyrosine phosphatase-like A domain containing 2 |
| 2 | 10438405 | -0.0999018 | 0.1139124 | 0.5232862 | IgI-V1        | immunoglobulin lambda variable 1                        |
| 2 | 10339701 | -0.1907344 | 0.255432  | 0.5207038 |               |                                                         |
| 2 | 10343852 | -0.2831682 | 0.2589402 | 0.5181406 |               |                                                         |
| 2 | 10341176 | -0.1827082 | 0.0170758 | 0.516327  |               |                                                         |
| 2 | 10407803 | -0.4183238 | 0.3232694 | 0.5154    | GPR137B       | G protein-coupled receptor 137B                         |
| 2 | 10428376 | -0.1964356 | 0.1281504 | 0.5150654 | ANGPT1        | angiotensinogen 1                                       |
| 2 | 10525365 | -0.0844586 | 0.4382686 | 0.513776  | HVCN1         | hydrogen voltage-gated channel 1                        |
| 2 | 10344498 | -0.098598  | 0.019697  | 0.5125674 |               |                                                         |
| 2 | 10340641 | -0.1823064 | 0.3971678 | 0.5103816 |               |                                                         |
| 2 | 10341856 | 0.0394748  | 0.6117738 | 0.5099288 |               |                                                         |
| 2 | 10341404 | 0.4446882  | 0.3058046 | 0.5086178 |               |                                                         |
| 2 | 10341424 | -0.0363316 | 0.605655  | 0.507274  |               |                                                         |
| 2 | 10593499 | 0.1906922  | 0.2947926 | 0.5027192 | C11orf87      | chromosome 11 open reading frame 87                     |
| 2 | 10554599 | -0.0138944 | 0.045797  | 0.5023502 | ADAMTSL3      | ADAMTS-like 3                                           |
| 2 | 10342825 | 0.0919492  | 0.12097   | 0.5006594 |               |                                                         |
| 2 | 10514185 | -0.1280094 | 0.121993  | 0.4984276 |               |                                                         |
| 2 | 10343375 | -0.2763744 | 0.5417344 | 0.4982356 |               |                                                         |
| 2 | 10387821 | -0.2005068 | 0.1055504 | 0.4945546 | ALOX12        | arachidonate 12-lipoxygenase                            |
| 2 | 10341902 | -0.189241  | 0.12061   | 0.4942444 |               |                                                         |
| 2 | 10411373 | -0.112559  | 0.2547298 | 0.4907994 | HEXB          | hexosaminidase B (beta polypeptide)                     |
| 2 | 10372648 | 0.073996   | 0.508846  | 0.49076   | Lyz1/Lyz2     | lysozyme 2                                              |
| 2 | 10339368 | -0.188901  | 0.1598632 | 0.4904694 |               |                                                         |
| 2 | 10341472 | -0.0834932 | 0.0515348 | 0.484064  |               |                                                         |
| 2 | 10581151 | 0.149494   | 0.2003284 | 0.4825694 | RRAD          | Ras-related associated with diabetes                    |
| 2 | 10538871 | -0.081158  | 0.054819  | 0.4748436 |               |                                                         |
| 2 | 10340944 | -0.1083164 | 0.122037  | 0.474302  |               |                                                         |
| 2 | 10538868 | -0.0319804 | 0.0941336 | 0.471769  |               |                                                         |
| 2 | 10342258 | -0.0886528 | 0.2759672 | 0.4612006 |               |                                                         |
| 2 | 10342615 | -0.2178104 | 0.2196296 | 0.4513272 |               |                                                         |

**Online Table 3. Gene list of cluster 8**

| Cluster | Probe Set ID | Day 4     | Day 7     | Day 60    | Symbol                    | Entrez Gene Name                                                |
|---------|--------------|-----------|-----------|-----------|---------------------------|-----------------------------------------------------------------|
| 8       | 10343814     | 0.057474  | -0.260061 | -1.044283 |                           |                                                                 |
| 8       | 10343210     | -0.006554 | 0.29227   | -0.906136 |                           |                                                                 |
| 8       | 10343359     | 0.0335406 | -0.114459 | -0.898168 |                           |                                                                 |
| 8       | 10340089     | -0.069631 | -0.447173 | -0.842473 |                           |                                                                 |
| 8       | 10340454     | -0.176305 | -0.150989 | -0.813968 |                           |                                                                 |
| 8       | 10342440     | -0.165801 | -0.459581 | -0.810953 |                           |                                                                 |
| 8       | 10342239     | -0.22637  | -0.365949 | -0.807563 |                           |                                                                 |
| 8       | 10340111     | -0.691877 | 0.2855862 | -0.800236 |                           |                                                                 |
| 8       | 10339482     | -0.19713  | 0.125478  | -0.797052 |                           |                                                                 |
| 8       | 10344438     | -0.609841 | -0.075026 | -0.794139 |                           |                                                                 |
| 8       | 10584870     | -0.061601 | 0.3343204 | -0.783085 | TMPRSS13                  | transmembrane protease, serine 13                               |
| 8       | 10546450     | -0.186072 | 0.2033814 | -0.7797   | ADAMTS9                   | ADAM metalloproteinase with thrombospondin type 1 motif, 9      |
| 8       | 10546454     | -0.173559 | 0.2577978 | -0.762913 | ADAMTS9                   | ADAM metalloproteinase with thrombospondin type 1 motif, 9      |
| 8       | 10339483     | 0.086864  | -0.05119  | -0.742528 |                           |                                                                 |
| 8       | 10339551     | -0.413509 | -0.546079 | -0.736669 |                           |                                                                 |
| 8       | 10409876     | 0.0430542 | 0.150188  | -0.73402  | Ctla2a                    | cytotoxic T lymphocyte-associated protein 2 alpha               |
| 8       | 10339687     | -0.155523 | 0.046138  | -0.734003 |                           |                                                                 |
| 8       | 10343997     | -0.057852 | 0.0413066 | -0.728557 |                           |                                                                 |
| 8       | 10341429     | 0.0724998 | -0.040937 | -0.726538 |                           |                                                                 |
| 8       | 10343609     | -0.134781 | -0.052952 | -0.718581 |                           |                                                                 |
| 8       | 10374558     | -0.123948 | -0.17435  | -0.710369 |                           |                                                                 |
| 8       | 10338694     | -0.149355 | 0.3857772 | -0.685437 |                           |                                                                 |
| 8       | 10341953     | -0.029092 | 0.3241066 | -0.663133 |                           |                                                                 |
| 8       | 10338444     | -0.576996 | -0.573967 | -0.657339 |                           |                                                                 |
| 8       | 10339112     | -0.070495 | 0.170341  | -0.652994 |                           |                                                                 |
| 8       | 10342899     | -0.060883 | 0.0534208 | -0.652899 |                           |                                                                 |
| 8       | 10344097     | -0.030691 | -0.108291 | -0.644524 |                           |                                                                 |
| 8       | 10338454     | -0.610685 | -0.490796 | -0.643212 |                           |                                                                 |
| 8       | 10342346     | 0.0911672 | -0.152515 | -0.638822 |                           |                                                                 |
| 8       | 10582658     | -0.159881 | -0.299674 | -0.634761 | AGT                       | angiotensinogen (serpin peptidase inhibitor, clade A, member 8) |
| 8       | 10343687     | -0.873226 | -0.119928 | -0.632122 |                           |                                                                 |
| 8       | 10343669     | -0.098684 | 0.0694318 | -0.626682 |                           |                                                                 |
| 8       | 10342759     | -0.112837 | 0.1364118 | -0.624105 |                           |                                                                 |
| 8       | 10342055     | -0.232442 | -0.121436 | -0.618854 |                           |                                                                 |
| 8       | 10339575     | -0.503908 | -0.169805 | -0.614889 |                           |                                                                 |
| 8       | 10343523     | -0.265503 | 0.2772682 | -0.611669 |                           |                                                                 |
| 8       | 10343668     | -0.171751 | 0.2788828 | -0.61049  |                           |                                                                 |
| 8       | 10338735     | -0.247834 | -0.153316 | -0.600365 |                           |                                                                 |
| 8       | 10341481     | -0.222642 | 0.054183  | -0.592426 |                           |                                                                 |
| 8       | 10344406     | -0.117725 | 0.1935422 | -0.591294 |                           |                                                                 |
| 8       | 10339466     | 0.0199036 | 0.038895  | -0.583974 |                           |                                                                 |
| 8       | 10340328     | -0.133862 | 0.0259804 | -0.575554 |                           |                                                                 |
| 8       | 10342225     | -0.089146 | -0.036936 | -0.568064 |                           |                                                                 |
| 8       | 10340891     | -0.47981  | -0.134343 | -0.561921 |                           |                                                                 |
| 8       | 10344349     | -0.017971 | -0.046669 | -0.560743 |                           |                                                                 |
| 8       | 10342818     | -0.161457 | -0.152445 | -0.558365 |                           |                                                                 |
| 8       | 10343751     | -0.237626 | 0.2536828 | -0.55621  |                           |                                                                 |
| 8       | 10342379     | 0.048178  | -0.1463   | -0.555147 |                           |                                                                 |
| 8       | 10379840     | -0.044166 | 0.0759032 | -0.553581 | MYO19                     | myosin XIX                                                      |
| 8       | 10341924     | -0.406748 | 0.3219298 | -0.537201 |                           |                                                                 |
| 8       | 10343789     | -0.15811  | -0.06754  | -0.536874 |                           |                                                                 |
| 8       | 10339730     | -0.041331 | 0.047343  | -0.533815 |                           |                                                                 |
| 8       | 10339258     | -0.037248 | -0.143286 | -0.532816 |                           |                                                                 |
| 8       | 10342679     | -0.250192 | -0.137234 | -0.532184 |                           |                                                                 |
| 8       | 10343243     | -0.245494 | -0.405605 | -0.530705 |                           |                                                                 |
| 8       | 10582896     | -0.317428 | 0.1010356 | -0.529798 |                           |                                                                 |
| 8       | 10342033     | -0.222276 | -0.247679 | -0.52553  |                           |                                                                 |
| 8       | 10343890     | -0.081156 | 0.0355814 | -0.524317 |                           |                                                                 |
| 8       | 10341708     | -0.208428 | -0.418306 | -0.523708 |                           |                                                                 |
| 8       | 10342564     | -0.069737 | -0.21409  | -0.522057 |                           |                                                                 |
| 8       | 10339927     | -0.128385 | -0.299444 | -0.516851 |                           |                                                                 |
| 8       | 10546452     | -0.221495 | -0.007042 | -0.512991 | ADAMTS9                   | ADAM metalloproteinase with thrombospondin type 1 motif, 9      |
| 8       | 10339543     | -0.181043 | -0.196952 | -0.51234  |                           |                                                                 |
| 8       | 10582888     | -0.33681  | -0.006591 | -0.509682 |                           |                                                                 |
| 8       | 10338511     | 0.002489  | -0.12981  | -0.507331 |                           |                                                                 |
| 8       | 10344560     | -0.147628 | -0.12679  | -0.499866 |                           |                                                                 |
| 8       | 10342541     | -0.32466  | -0.230056 | -0.499548 |                           |                                                                 |
| 8       | 10343527     | -0.300646 | 0.1084552 | -0.499098 |                           |                                                                 |
| 8       | 10339085     | -0.116887 | -0.225779 | -0.496338 |                           |                                                                 |
| 8       | 10375313     | 0.0136774 | -0.202263 | -0.493559 | CCN1L                     | cyclin J-like                                                   |
| 8       | 10342207     | -0.245279 | -0.236198 | -0.492659 |                           |                                                                 |
| 8       | 10338941     | -0.31031  | -0.144122 | -0.489919 |                           |                                                                 |
| 8       | 10342075     | -0.12968  | -0.131082 | -0.48744  |                           |                                                                 |
| 8       | 10417235     | -0.236034 | 0.0386916 | -0.485718 | Gm16440 (includes others) | predicted gene 16440                                            |
| 8       | 10417315     | -0.236034 | 0.0386916 | -0.485718 | Gm16440 (includes others) | predicted gene 16440                                            |
| 8       | 10341415     | -0.153661 | -0.040949 | -0.485596 |                           |                                                                 |
| 8       | 10338115     | -0.213307 | 0.413667  | -0.483695 |                           |                                                                 |
| 8       | 10417226     | -0.288499 | -0.038072 | -0.481924 | Gm16440 (includes others) | predicted gene 16440                                            |
| 8       | 10342500     | -0.208908 | -0.094152 | -0.48061  |                           |                                                                 |
| 8       | 10341394     | -0.249291 | 0.1178438 | -0.480173 |                           |                                                                 |
| 8       | 10340451     | -0.308496 | -0.026275 | -0.479864 |                           |                                                                 |



|   |          |           |           |           |                           |                                                |
|---|----------|-----------|-----------|-----------|---------------------------|------------------------------------------------|
| 8 | 10342849 | -0.172329 | -0.263163 | -0.479368 |                           |                                                |
| 8 | 10344129 | -0.290719 | -0.216272 | -0.479095 |                           |                                                |
| 8 | 10343349 | -0.340894 | -0.313825 | -0.478528 |                           |                                                |
| 8 | 10341292 | -0.592945 | 0.0272726 | -0.478418 |                           |                                                |
| 8 | 10406334 | -0.132724 | 0.386618  | -0.474837 | MCTP1                     | multiple C2 domains, transmembrane 1           |
| 8 | 10343656 | -0.334096 | -0.101618 | -0.471975 |                           |                                                |
| 8 | 10344514 | -0.516229 | 0.1883406 | -0.471427 |                           |                                                |
| 8 | 10340714 | -0.255807 | -0.043323 | -0.470382 |                           |                                                |
| 8 | 10343952 | 0.016714  | -0.208138 | -0.469359 |                           |                                                |
| 8 | 10485840 | -0.458445 | -0.192511 | -0.467961 | RYR3                      | ryanodine receptor 3                           |
| 8 | 10340397 | -0.551116 | 0.1849844 | -0.466994 |                           |                                                |
| 8 | 10338304 | -0.089312 | 0.3853574 | -0.466588 |                           |                                                |
| 8 | 10341972 | -0.238572 | -0.092749 | -0.460335 |                           |                                                |
| 8 | 10343689 | -0.233525 | -0.18641  | -0.459112 |                           |                                                |
| 8 | 10342626 | -0.062494 | 0.024749  | -0.458706 |                           |                                                |
| 8 | 10340400 | -0.452172 | -0.313471 | -0.4577   |                           |                                                |
| 8 | 10338336 | -0.260591 | 0.284172  | -0.457535 |                           |                                                |
| 8 | 10340346 | -0.138686 | 0.193348  | -0.456546 |                           |                                                |
| 8 | 10412517 | -0.221063 | 0.106317  | -0.456167 |                           |                                                |
| 8 | 10340896 | -0.289683 | 0.1137688 | -0.454815 |                           |                                                |
| 8 | 10338740 | -0.035458 | -0.054936 | -0.45337  |                           |                                                |
| 8 | 10338775 | -0.321407 | -0.270201 | -0.451961 |                           |                                                |
| 8 | 10338183 | -0.491491 | -0.087994 | -0.451764 |                           |                                                |
| 8 | 10338467 | -0.16067  | -0.351098 | -0.449783 |                           |                                                |
| 8 | 10417408 | -0.300479 | -0.246387 | -0.448749 | Gm16440 (includes others) | predicted gene 16440                           |
| 8 | 10342231 | -0.278965 | 0.0384412 | -0.446843 |                           |                                                |
| 8 | 10342097 | -0.37157  | -0.352113 | -0.443872 |                           |                                                |
| 8 | 10342311 | -0.048637 | -0.212998 | -0.443197 |                           |                                                |
| 8 | 10343765 | -0.055235 | -0.006336 | -0.442502 |                           |                                                |
| 8 | 10338445 | -0.033066 | 0.0142492 | -0.44242  |                           |                                                |
| 8 | 10339992 | -0.118933 | 0.0115622 | -0.440094 |                           |                                                |
| 8 | 10341887 | -0.366725 | -0.067226 | -0.440001 |                           |                                                |
| 8 | 10343309 | -0.299251 | 0.0887494 | -0.439257 |                           |                                                |
| 8 | 10417258 | -0.297422 | -0.104262 | -0.439031 | Gm16440 (includes others) | predicted gene 16440                           |
| 8 | 10417371 | -0.294654 | 0.0717922 | -0.438682 | Gm2897                    | predicted gene 2897                            |
| 8 | 10479047 | -0.599109 | -0.38376  | -0.438358 | PCK1                      | phosphoenolpyruvate carboxykinase 1 (soluble)  |
| 8 | 10417302 | -0.315854 | -0.093141 | -0.438228 | Gm16440 (includes others) | predicted gene 16440                           |
| 8 | 10343655 | -0.189866 | 0.1208892 | -0.437892 |                           |                                                |
| 8 | 10417446 | -0.286566 | -0.07533  | -0.436575 | Gm16440 (includes others) | predicted gene 16440                           |
| 8 | 10417452 | -0.286566 | -0.07533  | -0.436575 | Gm16440 (includes others) | predicted gene 16440                           |
| 8 | 10343193 | -0.265318 | -0.147605 | -0.434836 |                           |                                                |
| 8 | 10344077 | -0.346702 | 0.1751756 | -0.432688 |                           |                                                |
| 8 | 10582882 | -0.279818 | -0.059763 | -0.430957 |                           |                                                |
| 8 | 10417319 | -0.304108 | -0.225864 | -0.429823 | Gm16440 (includes others) | predicted gene 16440                           |
| 8 | 10343171 | -0.106573 | 0.0688612 | -0.429037 |                           |                                                |
| 8 | 10343256 | -0.172659 | -0.106678 | -0.428571 |                           |                                                |
| 8 | 10342340 | -0.394726 | -0.140377 | -0.426665 |                           |                                                |
| 8 | 10338859 | -0.168585 | -0.166341 | -0.425653 |                           |                                                |
| 8 | 10344255 | -0.359483 | 0.2479562 | -0.424418 |                           |                                                |
| 8 | 10342695 | -0.238759 | -0.202227 | -0.423707 |                           |                                                |
| 8 | 10339552 | -0.002391 | -0.184565 | -0.42336  |                           |                                                |
| 8 | 10339700 | -0.32304  | -0.247053 | -0.422909 |                           |                                                |
| 8 | 10560719 | -0.156289 | -0.018259 | -0.422552 | LOC147710                 | hypothetical protein LOC147710                 |
| 8 | 10541644 | -0.223554 | -0.144275 | -0.420935 | CD163                     | CD163 molecule                                 |
| 8 | 10417421 | -0.303026 | -0.032895 | -0.418581 | Gm16440 (includes others) | predicted gene 16440                           |
| 8 | 10569870 | -0.578125 | -0.095982 | -0.417666 | RETN                      | resistin                                       |
| 8 | 10412549 | -0.319118 | -0.271854 | -0.417528 | Gm16440 (includes others) | predicted gene 16440                           |
| 8 | 10412491 | -0.348178 | 0.0461062 | -0.416952 |                           |                                                |
| 8 | 10417458 | -0.366682 | -0.136461 | -0.416151 | Gm16440 (includes others) | predicted gene 16440                           |
| 8 | 10343485 | -0.303343 | -0.068276 | -0.412863 |                           |                                                |
| 8 | 10344138 | -0.390965 | -0.176965 | -0.412505 |                           |                                                |
| 8 | 10566205 | -0.599107 | -0.221109 | -0.412316 | USP17L2 (includes others) | ubiquitin specific peptidase 17-like 2         |
| 8 | 10343044 | -0.229195 | 0.2471892 | -0.411114 |                           |                                                |
| 8 | 10341330 | -0.117604 | -0.224287 | -0.410309 |                           |                                                |
| 8 | 10525831 | -0.101296 | -0.062671 | -0.409452 |                           |                                                |
| 8 | 10342602 | -0.263089 | -0.101726 | -0.402354 |                           |                                                |
| 8 | 10341042 | -0.310178 | 0.1062262 | -0.402248 |                           |                                                |
| 8 | 10342132 | -0.218116 | -0.367014 | -0.401276 |                           |                                                |
| 8 | 10472514 | -0.157265 | 0.1591126 | -0.400952 | NOSTRIN                   | nitric oxide synthase trafficker               |
| 8 | 10417286 | -0.2538   | -0.065725 | -0.399924 |                           |                                                |
| 8 | 10516910 | -0.071214 | -0.21553  | -0.39839  | PHACTR4                   | phosphatase and actin regulator 4              |
| 8 | 10417269 | -0.259373 | 0.0708936 | -0.396012 |                           |                                                |
| 8 | 10417239 | -0.291879 | -0.156488 | -0.394771 | Gm16440 (includes others) | predicted gene 16440                           |
| 8 | 10412537 | -0.273151 | -0.049177 | -0.394336 | Gm16440 (includes others) | predicted gene 16440                           |
| 8 | 10571860 | -0.146354 | 0.0049078 | -0.394139 | HAND2                     | heart and neural crest derivatives expressed 2 |
| 8 | 10343964 | -0.23063  | -0.286814 | -0.392593 |                           |                                                |

|   |          |           |           |           |                           |                                                                       |
|---|----------|-----------|-----------|-----------|---------------------------|-----------------------------------------------------------------------|
| 8 | 10592044 | -0.470623 | -0.291752 | -0.392409 | TMEM45B                   | transmembrane protein 45B                                             |
| 8 | 10556297 | -0.02382  | -0.128412 | -0.39186  | ADM                       | adrenomedullin                                                        |
| 8 | 10417366 | -0.300055 | -0.133695 | -0.389423 | Gm16440 (includes others) | predicted gene 16440                                                  |
| 8 | 10485117 | -0.177666 | 0.1404688 | -0.388722 | CREB3L1                   | cAMP responsive element binding protein 3-like 1                      |
| 8 | 10339204 | -0.227876 | -0.08941  | -0.386793 |                           |                                                                       |
| 8 | 10412520 | -0.230829 | -0.080682 | -0.386179 | Gm16440 (includes others) | predicted gene 16440                                                  |
| 8 | 10343321 | -0.42069  | 0.2130392 | -0.381301 |                           |                                                                       |
| 8 | 10341310 | -0.125914 | -0.024266 | -0.381157 |                           |                                                                       |
| 8 | 10417373 | -0.260023 | -0.048878 | -0.380417 | Gm16440 (includes others) | predicted gene 16440                                                  |
| 8 | 10344103 | -0.121463 | 0.1500182 | -0.380258 |                           |                                                                       |
| 8 | 10340011 | -0.355634 | -0.264917 | -0.380123 |                           |                                                                       |
| 8 | 10338990 | -0.237975 | -0.331808 | -0.380043 |                           |                                                                       |
| 8 | 10340500 | -0.15484  | 0.0716388 | -0.379108 |                           |                                                                       |
| 8 | 10338606 | -0.055807 | -0.194168 | -0.378679 |                           |                                                                       |
| 8 | 10339445 | -0.113983 | -0.0665   | -0.378632 |                           |                                                                       |
| 8 | 10343231 | -0.134982 | -0.044001 | -0.378569 |                           |                                                                       |
| 8 | 10344296 | -0.088777 | 0.0959224 | -0.377986 |                           |                                                                       |
| 8 | 10344222 | -0.435427 | 0.2020756 | -0.376073 |                           |                                                                       |
| 8 | 10343450 | -0.568889 | 0.1000554 | -0.374765 |                           |                                                                       |
| 8 | 10417461 | -0.273723 | -0.052921 | -0.374539 | Gm16440 (includes others) | predicted gene 16440                                                  |
| 8 | 10340868 | -0.172004 | 0.0062092 | -0.374411 |                           |                                                                       |
| 8 | 10340348 | -0.095527 | -0.253397 | -0.373329 |                           |                                                                       |
| 8 | 10417264 | -0.289424 | -0.026723 | -0.372672 | Gm16440 (includes others) | predicted gene 16440                                                  |
| 8 | 10421730 | -0.140118 | -0.172687 | -0.371971 | C13orf30                  | chromosome 13 open reading frame 30                                   |
| 8 | 10364702 | -0.08798  | -0.009696 | -0.371656 | MIDN                      | midnolin                                                              |
| 8 | 10341514 | -0.189421 | -0.047354 | -0.371555 |                           |                                                                       |
| 8 | 10341689 | -0.163101 | -0.130894 | -0.371229 |                           |                                                                       |
| 8 | 10340196 | -0.238356 | -0.042083 | -0.370474 |                           |                                                                       |
| 8 | 10608100 | -0.056955 | -0.103744 | -0.370319 | Zfy1/Zfy2                 | zinc finger protein 1, Y linked                                       |
| 8 | 10340264 | -0.23117  | 0.0832176 | -0.370211 |                           |                                                                       |
| 8 | 10417245 | -0.295934 | -0.253074 | -0.370194 | Gm16440 (includes others) | predicted gene 16440                                                  |
| 8 | 10369290 | -0.037997 | -0.186712 | -0.370011 | DDIT4                     | DNA-damage-inducible transcript 4                                     |
| 8 | 10417411 | -0.328547 | -0.194052 | -0.367151 | HN1L                      | hematological and neurological expressed 1-like                       |
| 8 | 10344065 | -0.121017 | -0.143936 | -0.367079 |                           |                                                                       |
| 8 | 10344295 | -0.482019 | 0.2227288 | -0.367053 |                           |                                                                       |
| 8 | 10409866 | -0.10078  | 0.0492606 | -0.364796 | Ctla2b                    | cytotoxic T lymphocyte-associated protein 2 beta                      |
| 8 | 10338378 | -0.367165 | -0.284667 | -0.36229  |                           |                                                                       |
| 8 | 10341207 | -0.2916   | -0.14443  | -0.357818 |                           |                                                                       |
| 8 | 10343681 | -0.170371 | -0.151064 | -0.35779  |                           |                                                                       |
| 8 | 10342223 | -0.256812 | -0.124895 | -0.356855 |                           |                                                                       |
| 8 | 10343209 | -0.201601 | -0.035445 | -0.356663 |                           |                                                                       |
| 8 | 10340459 | -0.175355 | -0.268712 | -0.354854 |                           |                                                                       |
| 8 | 10362628 | -0.074213 | 0.0396628 | -0.353916 |                           |                                                                       |
| 8 | 10342751 | -0.277966 | -0.212993 | -0.352302 |                           |                                                                       |
| 8 | 10341130 | -0.074885 | -0.264668 | -0.350977 |                           |                                                                       |
| 8 | 10338685 | -0.243043 | 0.0613576 | -0.349644 |                           |                                                                       |
| 8 | 10342384 | -0.298297 | -0.235433 | -0.349317 |                           |                                                                       |
| 8 | 10344199 | -0.09449  | 0.0420494 | -0.349027 |                           |                                                                       |
| 8 | 10417326 | -0.242191 | -0.024587 | -0.348913 | Gm16440 (includes others) | predicted gene 16440                                                  |
| 8 | 10341152 | -0.318506 | 0.101641  | -0.348157 |                           |                                                                       |
| 8 | 10339531 | -0.180499 | -0.037833 | -0.347827 |                           |                                                                       |
| 8 | 10343645 | -0.173245 | 0.2145328 | -0.346607 |                           |                                                                       |
| 8 | 10341666 | -0.051049 | -0.063908 | -0.343754 |                           |                                                                       |
| 8 | 10344499 | -0.310503 | 0.000494  | -0.343519 |                           |                                                                       |
| 8 | 10497323 | -0.142723 | -0.089847 | -0.343112 | Gm10745                   | predicted gene 10745                                                  |
| 8 | 10339800 | -0.106697 | -0.0159   | -0.342907 |                           |                                                                       |
| 8 | 10342038 | -0.140026 | 0.1191986 | -0.342625 |                           |                                                                       |
| 8 | 10344398 | -0.312625 | -0.009168 | -0.342559 |                           |                                                                       |
| 8 | 10342941 | -0.162702 | -0.113457 | -0.342449 |                           |                                                                       |
| 8 | 10342767 | -0.052148 | -0.08102  | -0.340488 |                           |                                                                       |
| 8 | 10340771 | -0.104352 | 0.1323156 | -0.339692 |                           |                                                                       |
| 8 | 10344537 | -0.218055 | -0.086577 | -0.339665 |                           |                                                                       |
| 8 | 10471018 | -0.136093 | -0.167839 | -0.339611 | FAM73B                    | family with sequence similarity 73, member B                          |
| 8 | 10340696 | -0.449799 | -0.314795 | -0.338799 |                           |                                                                       |
| 8 | 10338620 | -0.393238 | 0.1009024 | -0.337971 |                           |                                                                       |
| 8 | 10417769 | -0.179688 | 0.0953506 | -0.33757  | Gm2897                    | predicted gene 2897                                                   |
| 8 | 10344342 | -0.25722  | 0.1943124 | -0.337142 |                           |                                                                       |
| 8 | 10340160 | -0.1109   | 0.0775744 | -0.337112 |                           |                                                                       |
| 8 | 10608693 | -0.275379 | -0.28359  | -0.335815 |                           |                                                                       |
| 8 | 10342670 | -0.461336 | 0.1803992 | -0.335271 |                           |                                                                       |
| 8 | 10340859 | -0.181561 | -0.308287 | -0.333946 |                           |                                                                       |
| 8 | 10338742 | -0.248499 | -0.182399 | -0.333668 |                           |                                                                       |
| 8 | 10403248 | -0.079034 | 0.0098688 | -0.333619 | Speer6-ps1                | spermatogenesis associated glutamate (E)-rich protein 6, pseudogene 1 |
| 8 | 10339105 | -0.159482 | 0.0787314 | -0.332771 |                           |                                                                       |
| 8 | 10342845 | -0.238552 | -0.062155 | -0.33151  |                           |                                                                       |
| 8 | 10340552 | -0.196721 | 0.1220386 | -0.331385 |                           |                                                                       |
| 8 | 10504986 | -0.158237 | -0.310626 | -0.331338 |                           |                                                                       |
| 8 | 10344381 | -0.242594 | -0.00442  | -0.331263 |                           |                                                                       |
| 8 | 10342585 | -0.336986 | 0.2043106 | -0.331244 |                           |                                                                       |
| 8 | 10338438 | -0.100256 | 0.0943342 | -0.330074 |                           |                                                                       |

|   |          |           |           |           |                            |                                                                 |
|---|----------|-----------|-----------|-----------|----------------------------|-----------------------------------------------------------------|
| 8 | 10398362 | -0.554912 | 0.0890954 | -0.329338 | AF357355                   | snoRNA AF357355                                                 |
| 8 | 10343513 | -0.43054  | -0.07914  | -0.328909 |                            |                                                                 |
| 8 | 10341676 | -0.130463 | -0.025333 | -0.32889  |                            |                                                                 |
| 8 | 10339082 | -0.399683 | -0.200451 | -0.328882 |                            |                                                                 |
| 8 | 10341248 | -0.214827 | 0.1217572 | -0.328337 |                            |                                                                 |
| 8 | 10362937 | -0.136109 | -0.24487  | -0.327643 |                            |                                                                 |
| 8 | 10344283 | -0.228082 | 0.0533264 | -0.32753  |                            |                                                                 |
| 8 | 10342159 | -0.175223 | -0.197507 | -0.326965 |                            |                                                                 |
| 8 | 10412495 | -0.327985 | 0.0251292 | -0.326112 |                            |                                                                 |
| 8 | 10417359 | -0.316844 | -0.083124 | -0.32568  | Gm16440 (includes others)  | predicted gene 16440                                            |
| 8 | 10488804 | -0.081785 | -0.191367 | -0.325504 |                            |                                                                 |
| 8 | 10339119 | -0.316348 | 0.0557388 | -0.323799 |                            |                                                                 |
| 8 | 10509947 | -0.184982 | 0.1048454 | -0.323165 | ARHGEF19                   | Rho guanine nucleotide exchange factor (GEF) 19                 |
| 8 | 10602038 | -0.078705 | -0.216869 | -0.322588 | CXorf41                    | chromosome X open reading frame 41                              |
| 8 | 10339346 | -0.232927 | -0.171761 | -0.322413 |                            |                                                                 |
| 8 | 10342691 | -0.125132 | -0.087516 | -0.322204 |                            |                                                                 |
| 8 | 10343429 | -0.329688 | 0.0106798 | -0.322012 |                            |                                                                 |
| 8 | 10339063 | -0.139756 | 0.012978  | -0.321805 |                            |                                                                 |
| 8 | 10392221 | -0.12925  | -0.145632 | -0.320681 | PECAM1                     | platelet/endothelial cell adhesion molecule                     |
| 8 | 10563943 | -0.137742 | -0.231032 | -0.319765 |                            |                                                                 |
| 8 | 10338314 | -0.143217 | -0.113702 | -0.319326 |                            |                                                                 |
| 8 | 10342471 | -0.204236 | 0.053316  | -0.318421 |                            |                                                                 |
| 8 | 10417504 | -0.245995 | -0.16544  | -0.316812 | Gm16440 (includes others)  | predicted gene 16440                                            |
| 8 | 10340093 | -0.067578 | -0.071574 | -0.31665  |                            |                                                                 |
| 8 | 10342731 | -0.401167 | 0.0184874 | -0.314487 |                            |                                                                 |
| 8 | 10448131 | -0.070439 | -0.062383 | -0.31382  | EG224552 (includes others) | vomeronal 2, receptor 107                                       |
| 8 | 10605633 | -0.074906 | -0.114926 | -0.313755 | Pet2                       | plasmacytoma expressed transcript 2                             |
| 8 | 10341578 | -0.21565  | -0.122194 | -0.313207 |                            |                                                                 |
| 8 | 10344396 | -0.065553 | -0.080023 | -0.313019 |                            |                                                                 |
| 8 | 10340664 | -0.230705 | -0.159785 | -0.311764 |                            |                                                                 |
| 8 | 10525837 | -0.1362   | 0.128989  | -0.311179 | DNAH10                     | dynein, axonemal, heavy chain 10                                |
| 8 | 10479740 | -0.150688 | -0.146352 | -0.310289 |                            |                                                                 |
| 8 | 10342414 | -0.186483 | -0.08339  | -0.309966 |                            |                                                                 |
| 8 | 10343892 | -0.17809  | -0.288905 | -0.308562 |                            |                                                                 |
| 8 | 10343174 | -0.266691 | -0.192188 | -0.308538 |                            |                                                                 |
| 8 | 10340239 | -0.327378 | -0.333815 | -0.307884 |                            |                                                                 |
| 8 | 10342305 | -0.078939 | -0.229537 | -0.307066 |                            |                                                                 |
| 8 | 10498568 | -0.338753 | 0.0581608 | -0.306609 | SHOX2                      | short stature homeobox 2                                        |
| 8 | 10564795 | -0.396624 | -0.252961 | -0.305425 | PLIN1                      | perilipin 1                                                     |
| 8 | 10347291 | -0.240868 | 0.213194  | -0.305303 | CXCR2                      | chemokine (C-X-C motif) receptor 2                              |
| 8 | 10339089 | -0.538814 | -0.249183 | -0.303939 |                            |                                                                 |
| 8 | 10341060 | -0.327688 | 0.2547564 | -0.303341 |                            |                                                                 |
| 8 | 10338238 | -0.135645 | -0.124075 | -0.302628 |                            |                                                                 |
| 8 | 10510604 | -0.103529 | 0.058184  | -0.301402 | DNAJC11                    | DnaJ (Hsp40) homolog, subfamily C, member 11                    |
| 8 | 10340839 | -0.299516 | -0.205938 | -0.300026 |                            |                                                                 |
| 8 | 10338499 | -0.482279 | -0.354847 | -0.298715 |                            |                                                                 |
| 8 | 10364030 | -0.084806 | -0.020635 | -0.29857  | ADORA2A                    | adenosine A2a receptor                                          |
| 8 | 10358991 | -0.100347 | 0.026636  | -0.29652  | KIAA1614                   | KIAA1614                                                        |
| 8 | 10338617 | -0.153139 | -0.107193 | -0.296359 |                            |                                                                 |
| 8 | 10413416 | -0.25307  | -0.178073 | -0.296208 | IL17RD                     | interleukin 17 receptor D                                       |
| 8 | 10340159 | -0.22935  | -0.06575  | -0.295973 |                            |                                                                 |
| 8 | 10343224 | -0.228365 | -0.113099 | -0.295951 |                            |                                                                 |
| 8 | 10345527 | -0.211699 | 0.0507954 | -0.293646 |                            |                                                                 |
| 8 | 10340817 | -0.347658 | -0.147173 | -0.29318  |                            |                                                                 |
| 8 | 10340350 | -0.403138 | -0.04769  | -0.292836 |                            |                                                                 |
| 8 | 10489451 | -0.090254 | -0.223507 | -0.292627 | Svs2                       | seminal vesicle secretory protein 2                             |
| 8 | 10606654 | -0.224125 | 0.2120846 | -0.292399 | XKRX                       | XK, Kell blood group complex subunit-related, X-linked          |
| 8 | 10344303 | -0.22335  | 0.0436574 | -0.292107 |                            |                                                                 |
| 8 | 10340463 | -0.231815 | -0.278607 | -0.291566 |                            |                                                                 |
| 8 | 10338901 | -0.175605 | 0.2313366 | -0.29147  |                            |                                                                 |
| 8 | 10341347 | -0.328009 | -0.203693 | -0.291083 |                            |                                                                 |
| 8 | 10343411 | -0.091389 | -0.003119 | -0.290966 |                            |                                                                 |
| 8 | 10590383 | -0.168881 | -0.302088 | -0.290547 | SS18L2                     | synovial sarcoma translocation gene on chromosome 18-like 2     |
| 8 | 10339837 | -0.190296 | 0.13286   | -0.290389 |                            |                                                                 |
| 8 | 10354598 | -0.130874 | -0.214024 | -0.290258 | HECW2                      | HECT, C2 and WW domain containing E3 ubiquitin protein ligase 2 |
| 8 | 10340142 | -0.084988 | -0.036424 | -0.290198 |                            |                                                                 |
| 8 | 10417253 | -0.191799 | -0.23945  | -0.289662 | Gm16440 (includes others)  | predicted gene 16440                                            |
| 8 | 10417281 | -0.191799 | -0.23945  | -0.289662 | Gm16440 (includes others)  | predicted gene 16440                                            |
| 8 | 10343507 | -0.375351 | 0.1357864 | -0.289082 |                            |                                                                 |
| 8 | 10340323 | -0.370184 | -0.226815 | -0.288734 |                            |                                                                 |
| 8 | 10466359 | -0.244784 | 0.0306732 | -0.288587 | Olf1472/Olf1475            | olfactory receptor 1475                                         |
| 8 | 10529091 | -0.344295 | -0.154936 | -0.288149 |                            |                                                                 |
| 8 | 10340762 | -0.427294 | 0.0084886 | -0.288007 |                            |                                                                 |
| 8 | 10338143 | -0.099759 | -0.20656  | -0.287093 |                            |                                                                 |
| 8 | 10513186 | -0.140472 | -0.070741 | -0.287081 | Gm12538                    | predicted gene 12538                                            |
| 8 | 10400803 | -0.179707 | -0.107481 | -0.286171 |                            |                                                                 |
| 8 | 10344536 | -0.087497 | -0.164715 | -0.285821 |                            |                                                                 |
| 8 | 10340390 | -0.521609 | -0.070476 | -0.284241 |                            |                                                                 |
| 8 | 10338564 | -0.121147 | -0.016374 | -0.282849 |                            |                                                                 |
| 8 | 10564165 | -0.54     | -0.161959 | -0.282184 | PWCR1                      | small nucleolar RNA, C/D box 116 cluster                        |
| 8 | 10338721 | -0.317571 | -0.187175 | -0.281839 |                            |                                                                 |

|   |          |           |           |           |                           |                                                                                      |
|---|----------|-----------|-----------|-----------|---------------------------|--------------------------------------------------------------------------------------|
| 8 | 10343912 | -0.161742 | 0.0691242 | -0.280797 |                           |                                                                                      |
| 8 | 10338259 | -0.24496  | -0.241193 | -0.280442 |                           |                                                                                      |
| 8 | 10343416 | -0.104425 | 0.0285892 | -0.280424 |                           |                                                                                      |
| 8 | 10417485 | -0.214332 | -0.061144 | -0.280214 | Gm16440 (includes others) | predicted gene 16440                                                                 |
| 8 | 10417415 | -0.213421 | -0.160285 | -0.28001  | Gm16440 (includes others) | predicted gene 16440                                                                 |
| 8 | 10602765 | -0.159422 | -0.08274  | -0.279595 | KLHL34                    | kelch-like 34 (Drosophila)                                                           |
| 8 | 10343571 | -0.221499 | -0.127319 | -0.27945  |                           |                                                                                      |
| 8 | 10341092 | -0.134834 | 0.1378524 | -0.279135 |                           |                                                                                      |
| 8 | 10340253 | -0.379277 | -0.19059  | -0.279064 |                           |                                                                                      |
| 8 | 10370608 | -0.122034 | -0.274074 | -0.27878  |                           |                                                                                      |
| 8 | 10412503 | -0.25631  | -0.138371 | -0.278527 |                           |                                                                                      |
| 8 | 10341841 | -0.225648 | -0.097406 | -0.278339 |                           |                                                                                      |
| 8 | 10341284 | -0.201288 | 0.165742  | -0.276275 |                           |                                                                                      |
| 8 | 10343930 | -0.182379 | -0.094684 | -0.274768 |                           |                                                                                      |
| 8 | 10343029 | -0.193953 | -0.195918 | -0.274278 |                           |                                                                                      |
| 8 | 10342979 | -0.154913 | -0.114845 | -0.274273 |                           |                                                                                      |
| 8 | 10342351 | -0.0845   | -0.113184 | -0.273433 |                           |                                                                                      |
| 8 | 10342536 | -0.228884 | -0.188389 | -0.273344 |                           |                                                                                      |
| 8 | 10340166 | -0.453666 | -0.238127 | -0.271686 |                           |                                                                                      |
| 8 | 10487886 | -0.170372 | 0.132912  | -0.270108 | ADRA1D                    | adrenergic, alpha-1D-, receptor                                                      |
| 8 | 10338451 | -0.232567 | 0.0708276 | -0.269438 |                           |                                                                                      |
| 8 | 10338776 | -0.499155 | 0.1465858 | -0.268269 |                           |                                                                                      |
| 8 | 10343038 | -0.382079 | -0.266792 | -0.267469 |                           |                                                                                      |
| 8 | 10569331 | -0.077391 | -0.161265 | -0.267065 | Gm14492                   | predicted gene 14492                                                                 |
| 8 | 10344504 | -0.191272 | -0.181418 | -0.265858 |                           |                                                                                      |
| 8 | 10344183 | -0.086172 | -0.061285 | -0.265204 |                           |                                                                                      |
| 8 | 10343101 | -0.1983   | 0.1356988 | -0.26508  |                           |                                                                                      |
| 8 | 10340699 | -0.429548 | -0.262122 | -0.264489 |                           |                                                                                      |
| 8 | 10339561 | -0.107321 | -0.252356 | -0.263955 |                           |                                                                                      |
| 8 | 10507152 | -0.454368 | 0.1462166 | -0.263722 | CYP4A22                   | cytochrome P450, family 4, subfamily A, polypeptide 22                               |
| 8 | 10364856 | -0.174531 | 0.015259  | -0.263603 | DOT1L                     | DOT1-like, histone H3 methyltransferase (S. cerevisiae)                              |
| 8 | 10343391 | -0.192866 | 0.0787776 | -0.262558 |                           |                                                                                      |
| 8 | 10343583 | -0.480697 | 0.2306948 | -0.262514 |                           |                                                                                      |
| 8 | 10340455 | -0.192013 | 0.0149976 | -0.262296 |                           |                                                                                      |
| 8 | 10419465 | -0.130481 | 0.0055718 | -0.261528 | CCNB1IP1                  | cyclin B1 interacting protein 1, E3 ubiquitin protein ligase                         |
| 8 | 10341618 | -0.174316 | -0.082875 | -0.261521 |                           |                                                                                      |
| 8 | 10338323 | -0.426284 | 0.1887564 | -0.261503 |                           |                                                                                      |
| 8 | 10344416 | -0.218606 | -0.274815 | -0.259829 |                           |                                                                                      |
| 8 | 10412699 | -0.287593 | -0.213032 | -0.259721 |                           |                                                                                      |
| 8 | 10405781 | -0.183862 | 0.0738744 | -0.259682 | mir-27                    | microRNA 27a                                                                         |
| 8 | 10341674 | -0.203367 | 0.0863468 | -0.2594   |                           |                                                                                      |
| 8 | 10539080 | -0.161582 | -0.205782 | -0.259055 | ST3GAL5                   | ST3 beta-galactoside alpha-2,3-sialyltransferase 5                                   |
| 8 | 10343830 | -0.26963  | 0.0625298 | -0.258379 |                           |                                                                                      |
| 8 | 10344542 | -0.136382 | -0.091236 | -0.258145 |                           |                                                                                      |
| 8 | 10341215 | -0.119385 | -0.048098 | -0.25727  |                           |                                                                                      |
| 8 | 10341046 | -0.363697 | -0.057822 | -0.256688 |                           |                                                                                      |
| 8 | 10344156 | -0.12518  | 0.0612728 | -0.255548 |                           |                                                                                      |
| 8 | 10342144 | -0.136323 | -0.210652 | -0.2554   |                           |                                                                                      |
| 8 | 10451932 | -0.178182 | -0.30303  | -0.255367 | PLIN4                     | perilipin 4                                                                          |
| 8 | 10340233 | -0.130731 | -0.20432  | -0.255123 |                           |                                                                                      |
| 8 | 10341281 | -0.200267 | -0.204992 | -0.253598 |                           |                                                                                      |
| 8 | 10344357 | -0.373728 | 0.0172438 | -0.253512 |                           |                                                                                      |
| 8 | 10341296 | -0.197382 | 0.147644  | -0.253087 |                           |                                                                                      |
| 8 | 10343925 | -0.11782  | -0.132958 | -0.252939 | HES1                      | hairy and enhancer of split 1, (Drosophila)                                          |
| 8 | 10503234 | -0.126173 | 0.0224428 | -0.252311 | CLVS1                     | clavesin 1                                                                           |
| 8 | 10342902 | -0.518509 | -0.096973 | -0.252185 |                           |                                                                                      |
| 8 | 10338805 | -0.116028 | -0.067146 | -0.252087 |                           |                                                                                      |
| 8 | 10339309 | -0.090574 | -0.192989 | -0.251997 |                           |                                                                                      |
| 8 | 10343946 | -0.148025 | 0.0592572 | -0.251738 |                           |                                                                                      |
| 8 | 10340250 | -0.274245 | -0.02747  | -0.250759 |                           |                                                                                      |
| 8 | 10339235 | -0.280985 | -0.093618 | -0.250516 |                           |                                                                                      |
| 8 | 10342079 | -0.155027 | -0.131186 | -0.250317 |                           |                                                                                      |
| 8 | 10492452 | -0.158713 | -0.059334 | -0.24946  |                           |                                                                                      |
| 8 | 10343650 | -0.244602 | 0.1486712 | -0.249115 |                           |                                                                                      |
| 8 | 10342766 | -0.160843 | -0.03879  | -0.248731 |                           |                                                                                      |
| 8 | 10478772 | -0.11989  | -0.120563 | -0.248365 | ARFGEF2                   | ADP-ribosylation factor guanine nucleotide-exchange factor 2 (brefeldin A-inhibited) |
| 8 | 10344428 | -0.094425 | -0.202283 | -0.247805 |                           |                                                                                      |
| 8 | 10499560 | -0.128266 | -0.194768 | -0.246831 | ADAM15                    | ADAM metallopeptidase domain 15                                                      |
| 8 | 10412543 | -0.183427 | -0.19228  | -0.246685 | Gm16440 (includes others) | predicted gene 16440                                                                 |
| 8 | 10341270 | -0.22742  | -0.021506 | -0.246573 |                           |                                                                                      |
| 8 | 10338534 | -0.282875 | -0.225242 | -0.246484 |                           |                                                                                      |
| 8 | 10341640 | -0.20449  | -0.136875 | -0.245892 |                           |                                                                                      |
| 8 | 10439080 | -0.290188 | -0.118461 | -0.24557  | OSTalpha                  | organic solute transporter alpha                                                     |
| 8 | 10570068 | -0.215152 | -0.034761 | -0.245366 | COL4A2                    | collagen, type IV, alpha 2                                                           |
| 8 | 10453939 | -0.143641 | -0.139409 | -0.244483 | LAMA3                     | laminin, alpha 3                                                                     |
| 8 | 10367828 | -0.226996 | 0.0016966 | -0.242654 | GRM1                      | glutamate receptor, metabotropic 1                                                   |
| 8 | 10372805 | -0.165543 | 0.0728342 | -0.242168 | Gm10743                   | predicted gene 10743                                                                 |
| 8 | 10339451 | -0.239928 | 0.1307144 | -0.241588 |                           |                                                                                      |
| 8 | 10380549 | -0.380253 | 0.0664244 | -0.24087  |                           |                                                                                      |
| 8 | 10375062 | -0.121461 | 0.0349228 | -0.240826 | HBQ1                      | hemoglobin, theta 1                                                                  |
| 8 | 10398420 | -0.249869 | -0.093797 | -0.240758 | mir-154                   | microRNA 656                                                                         |
| 8 | 10598087 | -0.346756 | 0.0505858 | -0.240497 |                           |                                                                                      |
| 8 | 10341848 | -0.270125 | 0.03774   | -0.24011  |                           |                                                                                      |

|   |          |           |           |           |                           |                                                                                        |
|---|----------|-----------|-----------|-----------|---------------------------|----------------------------------------------------------------------------------------|
| 8 | 10564169 | -0.421228 | -0.1985   | -0.239041 | PWCR1                     | small nucleolar RNA, C/D box 116 cluster                                               |
| 8 | 10603252 | -0.17863  | -0.102166 | -0.238612 | LARP4                     | La ribonucleoprotein domain family, member 4                                           |
| 8 | 10417773 | -0.256633 | -0.162403 | -0.237971 | Gm16440 (includes others) | predicted gene 16440                                                                   |
| 8 | 10343759 | -0.151292 | -0.283123 | -0.237319 |                           |                                                                                        |
| 8 | 10339428 | -0.300562 | 0.0704936 | -0.236979 |                           |                                                                                        |
| 8 | 10339484 | -0.303885 | -0.124769 | -0.236865 |                           |                                                                                        |
| 8 | 10342284 | -0.185752 | 0.0533684 | -0.236204 |                           |                                                                                        |
| 8 | 10343093 | -0.128842 | -0.186408 | -0.236134 |                           |                                                                                        |
| 8 | 10460194 | -0.153186 | -0.268086 | -0.236128 |                           |                                                                                        |
| 8 | 10567739 | -0.168187 | -0.162766 | -0.234747 | 4933440M02Rik             | RIKEN cDNA 4933440M02 gene                                                             |
| 8 | 10339783 | -0.109908 | -0.143389 | -0.23405  |                           |                                                                                        |
| 8 | 10371844 | -0.209545 | -0.039877 | -0.23397  |                           |                                                                                        |
| 8 | 10576835 | -0.32464  | -0.001306 | -0.233753 | Cd209f/Cd209g             | CD209g antigen                                                                         |
| 8 | 10420171 | -0.141882 | -0.112938 | -0.232734 | ADCY4                     | adenylate cyclase 4                                                                    |
| 8 | 10341994 | -0.293669 | 0.0187494 | -0.232671 |                           |                                                                                        |
| 8 | 10341135 | -0.232101 | 0.045258  | -0.232361 |                           |                                                                                        |
| 8 | 10344022 | -0.214864 | -0.232948 | -0.232291 |                           |                                                                                        |
| 8 | 10532592 | -0.251064 | -0.127217 | -0.231579 | MYO18B                    | myosin XVIIIIB                                                                         |
| 8 | 10543870 | -0.111617 | -0.086006 | -0.231556 | Npn2                      | neoplastic progression 2                                                               |
| 8 | 10454235 | -0.264465 | -0.118204 | -0.231452 | ASXL3                     | additional sex combs like 3 (Drosophila)                                               |
| 8 | 10407416 | -0.096805 | -0.08297  | -0.230378 | CALML3                    | calmodulin-like 3                                                                      |
| 8 | 10338717 | -0.196079 | -0.169528 | -0.230183 |                           |                                                                                        |
| 8 | 10343087 | -0.383043 | -0.255052 | -0.229685 |                           |                                                                                        |
| 8 | 10497077 | -0.246855 | -0.117059 | -0.229463 | mir-186                   | microRNA 186                                                                           |
| 8 | 10576680 | -0.172341 | -0.216136 | -0.228931 | ZNF821                    | zinc finger protein 821                                                                |
| 8 | 10341506 | -0.121456 | 0.0402508 | -0.22892  |                           |                                                                                        |
| 8 | 10468415 | -0.110675 | -0.180605 | -0.228686 | WDR96                     | WD repeat domain 96                                                                    |
| 8 | 10410235 | -0.177822 | -0.044917 | -0.227669 |                           |                                                                                        |
| 8 | 10340085 | -0.421906 | -0.094255 | -0.227081 |                           |                                                                                        |
| 8 | 10402997 | -0.158691 | -0.225727 | -0.22696  | LOC630837                 | ig heavy chain V region 5-84-like                                                      |
| 8 | 10508788 | -0.122615 | -0.062374 | -0.22647  | AHDC1                     | AT hook, DNA binding motif, containing 1                                               |
| 8 | 10342048 | -0.104357 | -0.157793 | -0.225663 |                           |                                                                                        |
| 8 | 10422164 | -0.23054  | -0.19178  | -0.225622 | EDNRB                     | endothelin receptor type B                                                             |
| 8 | 10343451 | -0.502599 | -0.080583 | -0.225084 |                           |                                                                                        |
| 8 | 10343752 | -0.231035 | -0.016829 | -0.224774 |                           |                                                                                        |
| 8 | 10584309 | -0.175753 | -0.023137 | -0.223771 | C11orf61                  | chromosome 11 open reading frame 61                                                    |
| 8 | 10605355 | -0.130288 | -0.205801 | -0.223591 |                           |                                                                                        |
| 8 | 10339058 | -0.162668 | -0.017862 | -0.223552 |                           |                                                                                        |
| 8 | 10341313 | -0.14936  | 0.0626136 | -0.222563 |                           |                                                                                        |
| 8 | 10412513 | -0.227094 | -0.252989 | -0.222423 | Gm16440 (includes others) | predicted gene 16440                                                                   |
| 8 | 10510908 | -0.091757 | -0.135669 | -0.222413 |                           |                                                                                        |
| 8 | 10570972 | -0.094254 | -0.141394 | -0.222328 | A730045E13Rik             | RIKEN cDNA A730045E13 gene                                                             |
| 8 | 10549265 | -0.115275 | -0.096711 | -0.221914 | IFLTD1                    | intermediate filament tail domain containing 1                                         |
| 8 | 10395849 | -0.134856 | -0.019873 | -0.221616 | PAX9                      | paired box 9                                                                           |
| 8 | 10344496 | -0.443335 | 0.1398238 | -0.220675 |                           |                                                                                        |
| 8 | 10471550 | -0.16645  | 0.0576694 | -0.220449 | RpH2                      | ribosomal protein L12                                                                  |
| 8 | 10515974 | -0.144439 | -0.142086 | -0.220267 | NFYC                      | nuclear transcription factor Y, gamma                                                  |
| 8 | 10340396 | -0.544263 | 0.1212022 | -0.220031 |                           |                                                                                        |
| 8 | 10367471 | -0.161757 | 0.0440228 | -0.219606 | Olfir763/Olfr9            | olfactory receptor 9                                                                   |
| 8 | 10427879 | -0.263447 | 0.0958018 | -0.217993 |                           |                                                                                        |
| 8 | 10341500 | -0.490407 | -0.084223 | -0.217945 |                           |                                                                                        |
| 8 | 10427659 | -0.151985 | -0.19669  | -0.217386 |                           |                                                                                        |
| 8 | 10448350 | -0.117633 | -0.116959 | -0.217224 | PAQR4                     | progesterin and adipoQ receptor family member IV                                       |
| 8 | 10490845 | -0.165375 | -0.198912 | -0.217102 | CHMP4C                    | chromatin modifying protein 4C                                                         |
| 8 | 10563931 | -0.14396  | -0.191815 | -0.217073 |                           |                                                                                        |
| 8 | 10338301 | -0.517518 | -0.079925 | -0.21705  |                           |                                                                                        |
| 8 | 10493307 | -0.298185 | -0.197765 | -0.216896 |                           |                                                                                        |
| 8 | 10552288 | -0.130438 | -0.115579 | -0.216438 | VSTM2B                    | V-set and transmembrane domain containing 2B                                           |
| 8 | 10517067 | -0.134084 | -0.092445 | -0.215499 | SFN                       | stratifin                                                                              |
| 8 | 10473363 | -0.345935 | 0.1896584 | -0.215355 | TIMM10                    | translocase of inner mitochondrial membrane 10 homolog (yeast)                         |
| 8 | 10340869 | -0.385066 | -0.112162 | -0.215222 |                           |                                                                                        |
| 8 | 10398354 | -0.435925 | 0.078274  | -0.214984 |                           |                                                                                        |
| 8 | 10470392 | -0.352137 | -0.210214 | -0.214704 | ADAMTSL2                  | ADAMTS-like 2                                                                          |
| 8 | 10551421 | -0.284097 | 0.0742338 | -0.214049 | Zfp60 (includes others)   | zinc finger protein 60                                                                 |
| 8 | 10531675 | -0.155424 | 0.028196  | -0.21378  | SEC31A                    | SEC31 homolog A (S. cerevisiae)                                                        |
| 8 | 10339935 | -0.221859 | -0.179159 | -0.213566 |                           |                                                                                        |
| 8 | 10338469 | -0.279198 | -0.225112 | -0.213272 |                           |                                                                                        |
| 8 | 10342175 | -0.170098 | -0.183305 | -0.213103 |                           |                                                                                        |
| 8 | 10354370 | -0.166035 | -0.204998 | -0.212821 |                           |                                                                                        |
| 8 | 10341598 | -0.222546 | -0.144559 | -0.211102 |                           |                                                                                        |
| 8 | 10338823 | -0.227717 | -0.220252 | -0.211031 |                           |                                                                                        |
| 8 | 10340445 | -0.462918 | -0.124705 | -0.210592 |                           |                                                                                        |
| 8 | 10339496 | -0.20754  | -0.233672 | -0.210258 |                           |                                                                                        |
| 8 | 10581266 | -0.17067  | -0.13141  | -0.209591 | TPPP3                     | tubulin polymerization-promoting protein family member 3                               |
| 8 | 10341158 | -0.182291 | -0.047074 | -0.209235 |                           |                                                                                        |
| 8 | 10354003 | -0.165563 | -0.134562 | -0.208936 | MGAT4A                    | mannosyl (alpha-1,3-)-glycoprotein beta-1,4-N-acetylglucosaminyltransferase, isozyme A |
| 8 | 10447079 | -0.30529  | -0.292102 | -0.207367 | LOC100502965              | hypothetical protein LOC100502965                                                      |
| 8 | 10342614 | -0.24877  | -0.107097 | -0.207199 |                           |                                                                                        |
| 8 | 10595848 | -0.294923 | 0.1457502 | -0.207077 | SPSB4                     | splA/ryanodine receptor domain and SOCS box containing 4                               |
| 8 | 10343486 | -0.140262 | -0.163923 | -0.206499 |                           |                                                                                        |
| 8 | 10339433 | -0.487406 | 0.0857854 | -0.206482 |                           |                                                                                        |
| 8 | 10339200 | -0.126697 | -0.138939 | -0.205829 |                           |                                                                                        |
| 8 | 10489357 | -0.155555 | -0.136334 | -0.205367 | JPH2                      | junctophilin 2                                                                         |

|   |          |           |           |           |                              |                                                                                              |
|---|----------|-----------|-----------|-----------|------------------------------|----------------------------------------------------------------------------------------------|
| 8 | 10563764 | -0.15293  | -0.148619 | -0.204904 | Mrgprb3 (includes EG:292928) | MAS-related GPR, member B3                                                                   |
| 8 | 10480379 | -0.145376 | -0.116415 | -0.204663 | MRP5                         | mitochondrial ribosomal protein S5                                                           |
| 8 | 10489355 | -0.328134 | -0.122406 | -0.204465 | JPH2                         | junctional protein 2                                                                         |
| 8 | 10341821 | -0.356074 | -0.109092 | -0.204462 |                              |                                                                                              |
| 8 | 10366163 | -0.144536 | -0.180706 | -0.204377 | SLC6A15                      | solute carrier family 6 (neutral amino acid transporter), member 15                          |
| 8 | 10342114 | -0.417156 | -0.229549 | -0.204246 |                              |                                                                                              |
| 8 | 10601768 | -0.221899 | -0.2589   | -0.204067 | ARMCX4                       | armadillo repeat containing, X-linked 4                                                      |
| 8 | 10339747 | -0.201718 | 0.0117166 | -0.204054 |                              |                                                                                              |
| 8 | 10392464 | -0.166157 | 0.025509  | -0.203737 | FAM20A                       | family with sequence similarity 20, member A                                                 |
| 8 | 10563989 | -0.311615 | -0.12134  | -0.203678 |                              |                                                                                              |
| 8 | 10460879 | -0.147927 | -0.09504  | -0.203535 | MEN1                         | multiple endocrine neoplasia 1                                                               |
| 8 | 10581643 | -0.140322 | -0.112104 | -0.203372 |                              |                                                                                              |
| 8 | 10594301 | -0.22898  | -0.240603 | -0.202219 | CORO2B                       | coronin, actin binding protein, 2B                                                           |
| 8 | 10420437 | -0.320742 | -0.046138 | -0.201935 | ZDHHC20                      | zinc finger, DHHC-type containing 20                                                         |
| 8 | 10559790 | -0.234197 | -0.200671 | -0.201166 | Zim1                         | zinc finger, imprinted 1                                                                     |
| 8 | 10582890 | -0.294369 | -0.041459 | -0.200622 |                              |                                                                                              |
| 8 | 10340938 | -0.212447 | -0.132549 | -0.200114 |                              |                                                                                              |
| 8 | 10491858 | -0.284056 | -0.112619 | -0.200097 |                              |                                                                                              |
| 8 | 10442254 | -0.289371 | -0.154774 | -0.199925 |                              |                                                                                              |
| 8 | 10430127 | -0.134596 | -0.082904 | -0.199388 | ZNF251                       | zinc finger protein 251                                                                      |
| 8 | 10394798 | -0.192683 | -0.081493 | -0.198928 |                              |                                                                                              |
| 8 | 10404336 | -0.248431 | -0.066713 | -0.197722 |                              |                                                                                              |
| 8 | 10338631 | -0.234799 | -0.221083 | -0.197322 |                              |                                                                                              |
| 8 | 10602271 | -0.268202 | -0.162147 | -0.197085 |                              |                                                                                              |
| 8 | 10576495 | -0.163572 | -0.161988 | -0.196948 | TRIM67                       | tripartite motif containing 67                                                               |
| 8 | 10340974 | -0.183563 | -0.21089  | -0.196549 |                              |                                                                                              |
| 8 | 10417501 | -0.334936 | -0.198439 | -0.196023 | Gm16440 (includes others)    | predicted gene 16440                                                                         |
| 8 | 10576218 | -0.186349 | -0.219848 | -0.195902 | CPNE7                        | copine VII                                                                                   |
| 8 | 10566800 | -0.181325 | -0.153887 | -0.195742 | ASCL3                        | achaete-scute complex homolog 3 (Drosophila)                                                 |
| 8 | 10338289 | -0.16204  | -0.144913 | -0.195665 |                              |                                                                                              |
| 8 | 10523277 | -0.222296 | -0.173408 | -0.194927 | ANKRD56                      | ankyrin repeat domain 56                                                                     |
| 8 | 10461100 | -0.15006  | 0.0087234 | -0.194109 | HRASLS5                      | HRAS-like suppressor family, member 5                                                        |
| 8 | 10596135 | -0.174444 | -0.042668 | -0.192841 |                              |                                                                                              |
| 8 | 10440647 | -0.159573 | 0.0266334 | -0.192374 | CLDN8                        | claudin 8                                                                                    |
| 8 | 10343180 | -0.312017 | -0.056468 | -0.192032 |                              |                                                                                              |
| 8 | 10344544 | -0.461764 | -0.221578 | -0.191844 |                              |                                                                                              |
| 8 | 10592856 | -0.162201 | -0.078854 | -0.191816 | RPS25                        | ribosomal protein S25                                                                        |
| 8 | 10341675 | -0.299296 | -0.06617  | -0.191368 |                              |                                                                                              |
| 8 | 10339723 | -0.307543 | 0.0746594 | -0.191056 |                              |                                                                                              |
| 8 | 10491773 | -0.221109 | 0.0983504 | -0.190942 | SLC25A31                     | solute carrier family 25 (mitochondrial carrier; adenine nucleotide translocator), member 31 |
| 8 | 10361250 | -0.205227 | 0.0794396 | -0.190784 | CAMK1G                       | calcium/calmodulin-dependent protein kinase IG                                               |
| 8 | 10484886 | -0.197231 | -0.180662 | -0.190705 | Olf1272/Olf1273-ps           | olfactory receptor 1272                                                                      |
| 8 | 10339720 | -0.393693 | -0.026985 | -0.190477 |                              |                                                                                              |
| 8 | 10340508 | -0.368699 | 0.018861  | -0.190211 |                              |                                                                                              |
| 8 | 10473261 | -0.180748 | 0.0053478 | -0.190109 | FSIP2                        | fibrous sheath interacting protein 2                                                         |
| 8 | 10343265 | -0.168164 | -0.066676 | -0.189427 |                              |                                                                                              |
| 8 | 10341737 | -0.492329 | 0.010091  | -0.188461 |                              |                                                                                              |
| 8 | 10578413 | -0.157728 | -0.038237 | -0.188384 | Adam34 (includes others)     | a disintegrin and metallopeptidase domain 34                                                 |
| 8 | 10591668 | -0.158496 | -0.134116 | -0.187883 | RGL3                         | ral guanine nucleotide dissociation stimulator-like 3                                        |
| 8 | 10572755 | -0.284376 | 0.1300696 | -0.187734 |                              |                                                                                              |
| 8 | 10339539 | -0.260429 | -0.160332 | -0.186763 |                              |                                                                                              |
| 8 | 10387257 | -0.328299 | -0.180602 | -0.18663  | ALOX15B                      | arachidonate 15-lipoxygenase, type B                                                         |
| 8 | 10339467 | -0.349107 | -0.193788 | -0.186523 |                              |                                                                                              |
| 8 | 10342133 | -0.23931  | -0.10236  | -0.185616 |                              |                                                                                              |
| 8 | 10444717 | -0.22616  | -0.064759 | -0.185553 | C6orf47                      | chromosome 6 open reading frame 47                                                           |
| 8 | 10344355 | -0.383942 | 0.0436264 | -0.185403 |                              |                                                                                              |
| 8 | 10484555 | -0.14987  | -0.128719 | -0.184832 | Olf1037                      | olfactory receptor 1037                                                                      |
| 8 | 10344411 | -0.257262 | -0.239261 | -0.184731 |                              |                                                                                              |
| 8 | 10563527 | -0.302414 | -0.074121 | -0.184034 | USH1C                        | Usher syndrome 1C (autosomal recessive, severe)                                              |
| 8 | 10342167 | -0.337313 | 0.0503388 | -0.183927 |                              |                                                                                              |
| 8 | 10343372 | -0.155085 | 0.0066144 | -0.183607 |                              |                                                                                              |
| 8 | 10345167 | -0.18296  | 0.0371888 | -0.183606 |                              |                                                                                              |
| 8 | 10342985 | -0.322365 | -0.034603 | -0.183369 |                              |                                                                                              |
| 8 | 10448916 | -0.282699 | -0.069342 | -0.183281 | Tpsab1                       | tryptase alpha/beta 1                                                                        |
| 8 | 10476512 | -0.4292   | 0.0093482 | -0.183256 | SNAP25                       | synaptosomal-associated protein, 25kDa                                                       |
| 8 | 10583291 | -0.202073 | -0.215991 | -0.182962 | C11orf90                     | chromosome 11 open reading frame 90                                                          |
| 8 | 10344408 | -0.256562 | -0.074193 | -0.182925 |                              |                                                                                              |
| 8 | 10367513 | -0.125158 | -0.094086 | -0.182559 | Olf1777/Olf1800              | olfactory receptor 777                                                                       |
| 8 | 10519028 | -0.180272 | 0.04633   | -0.182325 | PRDM16                       | PR domain containing 16                                                                      |
| 8 | 10376938 | -0.268292 | -0.261037 | -0.182252 | CDRT4                        | CMT1A duplicated region transcript 4                                                         |
| 8 | 10488382 | -0.347352 | -0.039446 | -0.18143  | CD93                         | CD93 molecule                                                                                |
| 8 | 10407704 | -0.222314 | 0.073607  | -0.181115 |                              |                                                                                              |
| 8 | 10390022 | -0.17594  | 0.0336058 | -0.179354 | RSAD1                        | radical S-adenosyl methionine domain containing 1                                            |
| 8 | 10412488 | -0.144104 | -0.057546 | -0.179021 |                              |                                                                                              |
| 8 | 10340120 | -0.421564 | -0.048129 | -0.178712 |                              |                                                                                              |
| 8 | 10338897 | -0.294011 | -0.207964 | -0.178505 |                              |                                                                                              |
| 8 | 10559516 | -0.148333 | -0.069309 | -0.178239 | RDH13                        | retinol dehydrogenase 13 (all-trans/9-cis)                                                   |
| 8 | 10493498 | -0.188188 | -0.131864 | -0.178039 | DCST1                        | DC-STAMP domain containing 1                                                                 |
| 8 | 10590031 | -0.217657 | 0.0174478 | -0.177453 | ITGA9                        | integrin, alpha 9                                                                            |
| 8 | 10478109 | -0.305947 | -0.201601 | -0.177187 | ADIG                         | adipogenin                                                                                   |
| 8 | 10343489 | -0.376028 | -0.057386 | -0.177129 |                              |                                                                                              |
| 8 | 10343262 | -0.357342 | -0.171605 | -0.177036 |                              |                                                                                              |

|   |          |           |           |           |                                    |                                                                                |
|---|----------|-----------|-----------|-----------|------------------------------------|--------------------------------------------------------------------------------|
| 8 | 10342765 | -0.21631  | 0.0053532 | -0.176265 |                                    |                                                                                |
| 8 | 10413615 | -0.223517 | -0.034536 | -0.176001 | ITIH4                              | inter-alpha (globulin) inhibitor H4 (plasma Kallikrein-sensitive glycoprotein) |
| 8 | 10530393 | -0.154607 | -0.012829 | -0.175865 | GABRG1                             | gamma-aminobutyric acid (GABA) A receptor, gamma 1                             |
| 8 | 10343690 | -0.27588  | 0.0026398 | -0.175794 |                                    |                                                                                |
| 8 | 10339243 | -0.263969 | -0.256079 | -0.175694 |                                    |                                                                                |
| 8 | 10344467 | -0.240654 | -0.185711 | -0.175603 |                                    |                                                                                |
| 8 | 10399581 | -0.200002 | -0.10393  | -0.175084 | 3110053B16Rik                      | RIKEN cDNA 3110053B16 gene                                                     |
| 8 | 10497012 | -0.268173 | -0.083684 | -0.174075 | C1orf173                           | chromosome 1 open reading frame 173                                            |
| 8 | 10338203 | -0.430777 | 0.026665  | -0.173771 |                                    |                                                                                |
| 8 | 10410317 | -0.233575 | -0.008979 | -0.173725 | Zfp459                             | zinc finger protein 459                                                        |
| 8 | 10607366 | -0.129326 | -0.049113 | -0.173286 | SHROOM2                            | shroom family member 2                                                         |
| 8 | 10522661 | -0.314947 | -0.209268 | -0.172975 | KIAA1211                           | KIAA1211                                                                       |
| 8 | 10339160 | -0.201851 | 0.0312372 | -0.172916 |                                    |                                                                                |
| 8 | 10582899 | -0.383528 | 0.001306  | -0.172889 |                                    |                                                                                |
| 8 | 10339486 | -0.152183 | -0.077126 | -0.172828 |                                    |                                                                                |
| 8 | 10338811 | -0.257351 | 0.0711324 | -0.172715 |                                    |                                                                                |
| 8 | 10342906 | -0.218907 | -0.156758 | -0.172609 |                                    |                                                                                |
| 8 | 10537406 | -0.211062 | -0.191172 | -0.172445 | CLEC2L                             | C-type lectin domain family 2, member L                                        |
| 8 | 10340030 | -0.292248 | 0.052939  | -0.171789 |                                    |                                                                                |
| 8 | 10338827 | -0.298392 | -0.245593 | -0.17147  |                                    |                                                                                |
| 8 | 10411274 | -0.137321 | -0.074024 | -0.17138  | SV2C                               | synaptic vesicle glycoprotein 2C                                               |
| 8 | 10513002 | -0.172843 | -0.118107 | -0.17069  | Gm12471                            | predicted gene 12471                                                           |
| 8 | 10463138 | -0.162647 | -0.053301 | -0.170526 | DPPA2                              | developmental pluripotency associated 2                                        |
| 8 | 10408900 | -0.174968 | -0.022994 | -0.170362 |                                    |                                                                                |
| 8 | 10341897 | -0.300439 | -0.055409 | -0.169861 |                                    |                                                                                |
| 8 | 10588509 | -0.141228 | -0.065886 | -0.169558 | PCBP4                              | poly(rC) binding protein 4                                                     |
| 8 | 10508800 | -0.185139 | -0.081353 | -0.168798 | Gm3579                             | predicted gene 3579                                                            |
| 8 | 10573865 | -0.185139 | -0.081353 | -0.168798 | Gm3579                             | predicted gene 3579                                                            |
| 8 | 10340225 | -0.365348 | 0.1520552 | -0.168649 |                                    |                                                                                |
| 8 | 10577782 | -0.28276  | -0.031168 | -0.167588 | HTRA4                              | HtrA serine peptidase 4                                                        |
| 8 | 10341685 | -0.242699 | -0.173371 | -0.166765 |                                    |                                                                                |
| 8 | 10383358 | -0.185822 | -0.079687 | -0.166718 |                                    |                                                                                |
| 8 | 10398130 | -0.24767  | -0.02524  | -0.166558 | AK7                                | adenylate kinase 7                                                             |
| 8 | 10427075 | -0.187904 | -0.010871 | -0.166062 | KRT18                              | keratin 18                                                                     |
| 8 | 10524345 | -0.210537 | -0.116297 | -0.165863 | TPST2                              | tyrosylprotein sulfotransferase 2                                              |
| 8 | 10383785 | -0.172846 | -0.027582 | -0.165801 | C5orf52                            | chromosome 5 open reading frame 52                                             |
| 8 | 10571198 | -0.269069 | -0.069969 | -0.165631 | Gm1698                             | predicted gene 1698                                                            |
| 8 | 10492341 | -0.285352 | -0.09126  | -0.165624 | ARHGEP26                           | Rho guanine nucleotide exchange factor (GEF) 26                                |
| 8 | 10502519 | -0.146047 | -0.076811 | -0.164697 |                                    |                                                                                |
| 8 | 10342483 | -0.227912 | -0.176177 | -0.164492 |                                    |                                                                                |
| 8 | 10528036 | -0.255168 | -0.161103 | -0.164432 |                                    |                                                                                |
| 8 | 10550931 | -0.203071 | -0.11142  | -0.163846 | IRGQ                               | immunity-related GTPase family, Q                                              |
| 8 | 10345911 | -0.273466 | -0.032046 | -0.163707 | Gm8211                             | predicted gene 8211                                                            |
| 8 | 10481577 | -0.242149 | -0.123986 | -0.163406 | UCK1                               | uridine-cytidine kinase 1                                                      |
| 8 | 10543065 | -0.245721 | -0.235828 | -0.163051 |                                    |                                                                                |
| 8 | 10339797 | -0.2244   | -0.203748 | -0.162904 |                                    |                                                                                |
| 8 | 10344554 | -0.311818 | 0.1049666 | -0.162463 |                                    |                                                                                |
| 8 | 10343554 | -0.433781 | 0.0105858 | -0.162382 |                                    |                                                                                |
| 8 | 10338198 | -0.4248   | -0.267158 | -0.162032 |                                    |                                                                                |
| 8 | 10341103 | -0.154253 | -0.057558 | -0.161785 |                                    |                                                                                |
| 8 | 10576189 | -0.203769 | -0.169596 | -0.161097 |                                    |                                                                                |
| 8 | 10342262 | -0.376449 | 0.0304478 | -0.160764 |                                    |                                                                                |
| 8 | 10344140 | -0.407843 | 0.0600582 | -0.16052  |                                    |                                                                                |
| 8 | 10424075 | -0.168292 | -0.014246 | -0.160354 |                                    |                                                                                |
| 8 | 10338440 | -0.146351 | -0.055625 | -0.159812 |                                    |                                                                                |
| 8 | 10341170 | -0.236377 | 0.021074  | -0.159123 |                                    |                                                                                |
| 8 | 10474073 | -0.345967 | -0.091855 | -0.158401 |                                    |                                                                                |
| 8 | 10340671 | -0.191805 | -0.021583 | -0.158397 |                                    |                                                                                |
| 8 | 10493889 | -0.300356 | -0.031934 | -0.156074 | LCE1B                              | late cornified envelope 1B                                                     |
| 8 | 10341740 | -0.388692 | -0.126514 | -0.155849 |                                    |                                                                                |
| 8 | 10480849 | -0.163965 | -0.049947 | -0.155386 | Fcna                               | ficolin A                                                                      |
| 8 | 10447880 | -0.236248 | -0.190782 | -0.155268 | MRPL18                             | mitochondrial ribosomal protein L18                                            |
| 8 | 10600703 | -0.398885 | -0.154836 | -0.155195 | 1700072E05Rik                      | RIKEN cDNA 1700072E05 gene                                                     |
| 8 | 10343305 | -0.335202 | -0.092936 | -0.154703 |                                    |                                                                                |
| 8 | 10603425 | -0.147247 | -0.05162  | -0.154038 | GLOD5                              | glyoxalase domain containing 5                                                 |
| 8 | 10341457 | -0.302657 | -0.209247 | -0.153842 |                                    |                                                                                |
| 8 | 10441899 | -0.267229 | -0.222618 | -0.153839 | 4930488N24Rik<br>(includes others) | RIKEN cDNA 4930488N24 gene                                                     |
| 8 | 10340386 | -0.367564 | -0.098845 | -0.153178 |                                    |                                                                                |
| 8 | 10522944 | -0.248409 | -0.190602 | -0.153164 |                                    |                                                                                |
| 8 | 10506254 | -0.306372 | -0.052062 | -0.153034 | RAVER2                             | ribonucleoprotein, PTB-binding 2                                               |
| 8 | 10340737 | -0.278937 | -0.080999 | -0.152706 |                                    |                                                                                |
| 8 | 10604761 | -0.186136 | -0.095378 | -0.152052 | mir-504                            | microRNA 504                                                                   |
| 8 | 10339049 | -0.419972 | -0.189499 | -0.152003 |                                    |                                                                                |
| 8 | 10433795 | -0.193204 | -0.098259 | -0.15182  |                                    |                                                                                |
| 8 | 10349828 | -0.182657 | -0.000242 | -0.151488 | LRRN2                              | leucine rich repeat neuronal 2                                                 |
| 8 | 10413338 | -0.171944 | -0.024522 | -0.150788 |                                    |                                                                                |
| 8 | 10468419 | -0.253399 | -0.167824 | -0.150452 | WDR96                              | WD repeat domain 96                                                            |
| 8 | 10378649 | -0.174968 | -0.046198 | -0.150384 | SLC43A2                            | solute carrier family 43, member 2                                             |
| 8 | 10567456 | -0.22443  | -0.166277 | -0.150268 | DNAH3                              | dynein, axonemal, heavy chain 3                                                |
| 8 | 10339027 | -0.191095 | -0.046054 | -0.148907 |                                    |                                                                                |
| 8 | 10339079 | -0.372364 | 0.0248342 | -0.148849 |                                    |                                                                                |
| 8 | 10477715 | -0.258223 | -0.001525 | -0.148393 | mir-499                            | microRNA 499                                                                   |
| 8 | 10338106 | -0.32429  | 0.0217172 | -0.148381 |                                    |                                                                                |
| 8 | 10526541 | -0.185353 | -0.04728  | -0.148146 |                                    |                                                                                |
| 8 | 10343784 | -0.392612 | -0.030413 | -0.148078 |                                    |                                                                                |

|   |          |           |           |           |                            |                                                                            |
|---|----------|-----------|-----------|-----------|----------------------------|----------------------------------------------------------------------------|
| 8 | 10339969 | -0.304955 | 0.0306362 | -0.147554 |                            |                                                                            |
| 8 | 10342313 | -0.16177  | -0.033094 | -0.147033 |                            |                                                                            |
| 8 | 10477167 | -0.27789  | -0.018603 | -0.146826 | Mets2                      | malignant T cell amplified sequence 2                                      |
| 8 | 10342300 | -0.341892 | 0.1283944 | -0.146637 |                            |                                                                            |
| 8 | 10342790 | -0.235858 | 0.0269998 | -0.146375 |                            |                                                                            |
| 8 | 10465185 | -0.252837 | -0.07708  | -0.14592  | EHBPI1L1                   | EH domain binding protein 1-like 1                                         |
| 8 | 10380303 | -0.194526 | -0.085784 | -0.14539  | CA10                       | carbonic anhydrase X                                                       |
| 8 | 10466351 | -0.233963 | 0.0433786 | -0.144967 | Olf1459                    | olfactory receptor 1459                                                    |
| 8 | 10364888 | -0.27757  | 0.0034734 | -0.144852 | DOT1L                      | DOT1-like, histone H3 methyltransferase (S. cerevisiae)                    |
| 8 | 10599461 | -0.171033 | -0.056966 | -0.144181 | Calml (includes others)    | calmodulin 1                                                               |
| 8 | 10506736 | -0.261029 | 0.0544352 | -0.144111 | MAGOH                      | mago-nashi homolog, proliferation-associated (Drosophila)                  |
| 8 | 10385542 | -0.29288  | -0.124045 | -0.143665 | BTNL9                      | butyrophilin-like 9                                                        |
| 8 | 10343797 | -0.23986  | 0.0586098 | -0.143563 |                            |                                                                            |
| 8 | 10343012 | -0.216731 | -0.087678 | -0.14337  |                            |                                                                            |
| 8 | 10365926 | -0.239767 | -0.076363 | -0.142717 | 4732465J04Rik              | RIKEN cDNA 4732465J04 gene                                                 |
| 8 | 10344184 | -0.384985 | -0.003214 | -0.141137 |                            |                                                                            |
| 8 | 10585703 | -0.254061 | -0.111891 | -0.141077 | RPP25                      | ribonuclease P/MRP 25kDa subunit                                           |
| 8 | 10341498 | -0.323174 | -0.187013 | -0.140955 |                            |                                                                            |
| 8 | 10404012 | -0.307003 | 0.0397752 | -0.139844 | Vmn1r188 (includes others) | vomeroneasal 1 receptor 194                                                |
| 8 | 10586433 | -0.212314 | -0.092251 | -0.138931 | RBPM52                     | RNA binding protein with multiple splicing 2                               |
| 8 | 10342309 | -0.224615 | -0.134538 | -0.138389 |                            |                                                                            |
| 8 | 10371006 | -0.230448 | -0.054346 | -0.138056 | TIMM13                     | translocase of inner mitochondrial membrane 13 homolog (yeast)             |
| 8 | 10513504 | -0.276707 | -0.179967 | -0.137775 | Mup1 (includes others)     | major urinary protein 1                                                    |
| 8 | 10356876 | -0.237916 | -0.024498 | -0.137402 |                            |                                                                            |
| 8 | 10344045 | -0.248426 | 0.0239014 | -0.136621 |                            |                                                                            |
| 8 | 10341871 | -0.295595 | -0.240091 | -0.136617 |                            |                                                                            |
| 8 | 10404898 | -0.258799 | -0.194043 | -0.136225 | FLJ23152                   | hypothetical protein LOC401236                                             |
| 8 | 10559916 | -0.215014 | -0.023751 | -0.136157 |                            |                                                                            |
| 8 | 10357239 | -0.251248 | -0.177358 | -0.135299 | TMEM37                     | transmembrane protein 37                                                   |
| 8 | 10522784 | -0.266081 | 0.0576836 | -0.135224 |                            |                                                                            |
| 8 | 10346150 | -0.25995  | -0.122171 | -0.135017 | TMEFF2                     | transmembrane protein with EGF-like and two follistatin-like domains 2     |
| 8 | 10407072 | -0.266328 | 0.026732  | -0.134443 | ELOVL7                     | ELOVL family member 7, elongation of long chain fatty acids (yeast)        |
| 8 | 10343547 | -0.418964 | 0.0683108 | -0.134127 |                            |                                                                            |
| 8 | 10340052 | -0.342951 | -0.238559 | -0.133378 |                            |                                                                            |
| 8 | 10353794 | -0.19715  | -0.016017 | -0.13266  | FAM168B                    | family with sequence similarity 168, member B                              |
| 8 | 10532630 | -0.262021 | 0.0596818 | -0.132499 | ADRBK2                     | adrenergic, beta, receptor kinase 2                                        |
| 8 | 10339010 | -0.355882 | -0.012739 | -0.132498 |                            |                                                                            |
| 8 | 10340034 | -0.213512 | 0.007784  | -0.131717 |                            |                                                                            |
| 8 | 10394534 | -0.211602 | -0.058781 | -0.131656 | OSR1                       | odd-skipped related 1 (Drosophila)                                         |
| 8 | 10340115 | -0.250358 | 0.0365924 | -0.131313 |                            |                                                                            |
| 8 | 10601648 | -0.219175 | -0.063152 | -0.130661 | TNMD                       | tenomodulin                                                                |
| 8 | 10497319 | -0.394797 | 0.0009582 | -0.130639 |                            |                                                                            |
| 8 | 10522494 | -0.229195 | -0.081864 | -0.130513 |                            |                                                                            |
| 8 | 10344229 | -0.371902 | 0.0248098 | -0.13045  |                            |                                                                            |
| 8 | 10413598 | -0.265887 | -0.001654 | -0.129054 | TMEM110                    | transmembrane protein 110                                                  |
| 8 | 10383819 | -0.217943 | -0.06955  | -0.126522 | SEC14L2                    | SEC14-like 2 (S. cerevisiae)                                               |
| 8 | 10405779 | -0.352316 | 0.0777996 | -0.126475 | mir-23                     | microRNA 23a                                                               |
| 8 | 10515277 | -0.198482 | -0.062722 | -0.126198 | C1orf190                   | chromosome 1 open reading frame 190                                        |
| 8 | 10342319 | -0.399642 | -0.007539 | -0.123178 |                            |                                                                            |
| 8 | 10344815 | -0.258324 | -0.085949 | -0.122875 | CSPP1                      | centrosome and spindle pole associated protein 1                           |
| 8 | 10593776 | -0.365291 | -0.162203 | -0.122784 | NRG4                       | neuregulin 4                                                               |
| 8 | 10522388 | -0.272278 | -0.069377 | -0.121957 | SLC10A4                    | solute carrier family 10 (sodium/bile acid cotransporter family), member 4 |
| 8 | 10503008 | -0.312501 | -0.0419   | -0.121788 |                            |                                                                            |
| 8 | 10581388 | -0.315231 | 0.0853754 | -0.120772 | LCAT                       | lecithin-cholesterol acyltransferase                                       |
| 8 | 10569335 | -0.233889 | 0.0081914 | -0.118936 | H19                        | H19, imprinted maternally expressed transcript (non-protein coding)        |
| 8 | 10341512 | -0.334161 | -0.246212 | -0.118648 |                            |                                                                            |
| 8 | 10435543 | -0.214131 | -0.066368 | -0.117498 | GOLGB1                     | golgin B1                                                                  |
| 8 | 10562181 | -0.218691 | -0.062964 | -0.116952 | LSR                        | lipolysis stimulated lipoprotein receptor                                  |
| 8 | 10513467 | -0.316349 | -0.156031 | -0.113816 | Mup1 (includes others)     | major urinary protein 1                                                    |
| 8 | 10512332 | -0.289104 | -0.049    | -0.113407 | 4930466F19Rik              | RIKEN cDNA 4930466F19 gene                                                 |
| 8 | 10512354 | -0.289104 | -0.049    | -0.113407 | 4930466F19Rik              | RIKEN cDNA 4930466F19 gene                                                 |
| 8 | 10507143 | -0.293161 | -0.159971 | -0.111485 | CYP4A22                    | cytochrome P450, family 4, subfamily A, polypeptide 22                     |
| 8 | 10475314 | -0.439013 | 0.052199  | -0.110167 | MAP1A                      | microtubule-associated protein 1A                                          |
| 8 | 10499160 | -0.380511 | -0.213707 | -0.104239 | CD1D                       | CD1d molecule                                                              |
| 8 | 10545014 | -0.356304 | -0.041719 | -0.104052 | VOPP1                      | vesicular, overexpressed in cancer, pro-survival protein 1                 |
| 8 | 10465701 | -0.29889  | -0.103965 | -0.103983 | LGALS12                    | lectin, galactoside-binding, soluble, 12                                   |
| 8 | 10340564 | -0.386181 | -0.063664 | -0.103704 |                            |                                                                            |
| 8 | 10479185 | -0.324799 | -0.06893  | -0.101131 |                            |                                                                            |
| 8 | 10490248 | -0.324799 | -0.06893  | -0.101131 |                            |                                                                            |
| 8 | 10343334 | -0.309086 | -0.119324 | -0.097288 |                            |                                                                            |
| 8 | 10339150 | -0.373083 | -0.112068 | -0.093319 |                            |                                                                            |



**Online Table 4. Gene list of cluster 9**

| Cluster | Probe Set ID | Day 4     | Day 7     | Day 60     | Symbol                          | Entrez Gene Name                                                                   |
|---------|--------------|-----------|-----------|------------|---------------------------------|------------------------------------------------------------------------------------|
| 9       | 10455970     | 6.5951544 | 6.8408488 | 2.7550844  | LOC667597                       | cDNA sequence BC023105                                                             |
| 9       | 10608681     | 5.0975162 | 6.3055612 | 1.4049014  |                                 |                                                                                    |
| 9       | 10569102     | 4.1126826 | 4.610839  | 0.0802472  | IRF7                            | interferon regulatory factor 7                                                     |
| 9       | 10462621     | 4.0853566 | 4.1545878 | 0.735528   | IFIT3                           | interferon-induced protein with tetratricopeptide repeats 3                        |
| 9       | 10459066     | 3.8964194 | 6.333378  | 0.9808462  | Gm4841                          | predicted gene 4841                                                                |
| 9       | 10376324     | 3.7566458 | 5.4298996 | 1.0434714  | Gm12250                         | predicted gene 12250                                                               |
| 9       | 10462623     | 3.6725474 | 3.830307  | 0.4157976  | IFIT1                           | interferon-induced protein with tetratricopeptide repeats 1B                       |
| 9       | 10462618     | 3.6540016 | 4.0203848 | 0.6145778  | IFIT3                           | interferon-induced protein with tetratricopeptide repeats 3                        |
| 9       | 10502791     | 3.3811272 | 3.7192634 | 0.5582916  | IFI44                           | interferon-induced protein 44                                                      |
| 9       | 10376326     | 3.3571768 | 4.8523036 | 0.6859844  | Igtp                            | interferon gamma induced GTPase                                                    |
| 9       | 10455961     | 3.3253228 | 4.2918706 | 1.1203902  | ligp1/ligp1b                    | interferon inducible GTPase 1                                                      |
| 9       | 10541307     | 3.1859268 | 3.4566536 | 0.234833   | USP18                           | ubiquitin specific peptidase 18                                                    |
| 9       | 10462613     | 3.1582036 | 3.6723572 | 0.3264784  | IFIT2                           | interferon-induced protein with tetratricopeptide repeats 2                        |
| 9       | 10399710     | 2.9592028 | 2.9425508 | 0.3071108  | RSAD2                           | radical S-adenosyl methionine domain containing 2                                  |
| 9       | 10531407     | 2.8710192 | 4.9151102 | 1.0306794  | CXCL9                           | chemokine (C-X-C motif) ligand 9                                                   |
| 9       | 10455954     | 2.8416838 | 3.9194812 | 0.573159   | Gm4951                          | predicted gene 4951                                                                |
| 9       | 10461594     | 2.7655198 | 4.0269044 | 0.0122602  | Ms4a4c (includes others)        | membrane-spanning 4-domains, subfamily A, member 4C                                |
| 9       | 10420308     | 2.6737512 | 5.0710288 | 0.0711108  | GZMB                            | granzyme B (granzyme 2, cytotoxic T-lymphocyte-associated serine esterase 1)       |
| 9       | 10385500     | 2.6184044 | 4.318854  | 0.441812   | IRGM                            | immunity-related GTPase family, M                                                  |
| 9       | 10385507     | 2.5200064 | 5.2899154 | 0.346628   | 993011J21Rik1 (includes others) | RIKEN cDNA 993011J21 gene 1                                                        |
| 9       | 10462390     | 2.4727748 | 4.1343234 | 0.4389764  | CD274                           | CD274 molecule                                                                     |
| 9       | 10608646     | 2.4056752 | 3.4126048 | 0.840732   |                                 |                                                                                    |
| 9       | 10385533     | 2.3628012 | 3.9464244 | 0.5936638  | Tgtp1                           | T-cell specific GTPase 1                                                           |
| 9       | 10496580     | 2.3356844 | 3.5278056 | 0.3420088  | GBP4                            | guanylate binding protein 4                                                        |
| 9       | 10385518     | 2.3049124 | 3.7979412 | 0.6501804  | Tgtp1                           | T-cell specific GTPase 1                                                           |
| 9       | 10420488     | 2.293081  | 2.7739404 | 0.1588924  | D14Erd668e                      | DNA segment, Chr 14, ERATO Doi 668, expressed                                      |
| 9       | 10502801     | 2.2841482 | 2.9312582 | 0.261261   | IFI44L                          | interferon-induced protein 44-like                                                 |
| 9       | 10531724     | 2.2815106 | 3.822894  | 0.6683916  | PLAC8                           | placenta-specific 8                                                                |
| 9       | 10351873     | 2.2629668 | 3.185545  | 0.2148632  | BC094916/Pyhin1                 | pyrin and HIN domain family, member 1                                              |
| 9       | 10531415     | 2.1851942 | 3.4002956 | 0.3333844  | CXCL10                          | chemokine (C-X-C motif) ligand 10                                                  |
| 9       | 10420483     | 2.1796906 | 3.1472144 | 0.2032514  | Gm4902/Phf11                    | PHD finger protein 11                                                              |
| 9       | 10437224     | 2.1391056 | 2.200803  | 0.1448582  | MX1                             | myxovirus (influenza virus) resistance 1, interferon-inducible protein p78 (mouse) |
| 9       | 10351880     | 2.0908962 | 2.4197626 | 0.2390196  | Pydc3                           | pyrin domain containing 3                                                          |
| 9       | 10455957     | 2.0768002 | 3.296937  | 0.498244   |                                 |                                                                                    |
| 9       | 10389207     | 2.0050012 | 3.523642  | 0.2292062  | CCL5                            | chemokine (C-C motif) ligand 5                                                     |
| 9       | 10531994     | 1.9820206 | 3.1900306 | 0.178119   | GBP6                            | guanylate binding protein family, member 6                                         |
| 9       | 10434778     | 1.976805  | 2.6322212 | 0.1693046  | RTP4                            | receptor (chemosensory) transporter protein 4                                      |
| 9       | 10574145     | 1.9392818 | 3.3258394 | 0.4290558  | Nlr5                            | NLR family, CARD domain containing 5                                               |
| 9       | 10524621     | 1.9303814 | 2.56658   | 0.1803046  | Oas2                            | 2'-5' oligoadenylate synthetase-like 2                                             |
| 9       | 10441233     | 1.8923404 | 2.2067206 | 0.1452954  | MX1                             | myxovirus (influenza virus) resistance 1, interferon-inducible protein p78 (mouse) |
| 9       | 10496569     | 1.877639  | 2.983852  | 0.5104528  | GBP7                            | guanylate binding protein 7                                                        |
| 9       | 10379518     | 1.8525756 | 3.2992484 | -0.0624348 | CCL7                            | chemokine (C-C motif) ligand 7                                                     |
| 9       | 10379636     | 1.8405584 | 2.9966644 | -0.0240438 | SLFN12                          | schlafen family member 12                                                          |
| 9       | 10496555     | 1.8366324 | 3.697625  | 0.4470678  | GBP5                            | guanylate binding protein 5                                                        |
| 9       | 10379511     | 1.8287706 | 3.346293  | -0.0876922 | CCL13                           | chemokine (C-C motif) ligand 13                                                    |
| 9       | 10571984     | 1.8221954 | 2.3671382 | 0.3725068  | DDX60                           | DEAD (Asp-Glu-Ala-Asp) box polypeptide 60                                          |
| 9       | 10574149     | 1.7968578 | 3.0695354 | 0.4724992  | Nlr5                            | NLR family, CARD domain containing 5                                               |
| 9       | 10532019     | 1.7941714 | 3.5220264 | 0.1689848  | GBP6                            | guanylate binding protein family, member 6                                         |
| 9       | 10531987     | 1.790064  | 3.1560436 | 0.391632   | Gbp4                            | guanylate binding protein 4                                                        |
| 9       | 10496592     | 1.7553108 | 3.2674944 | 0.4885906  | GBP2                            | guanylate binding protein 2, interferon-inducible                                  |
| 9       | 10393573     | 1.7477276 | 2.354204  | 0.1808506  | LGALS3BP                        | lectin, galactoside-binding, soluble, 3 binding protein                            |
| 9       | 10346191     | 1.7256992 | 2.9799744 | 0.420577   | STAT1                           | signal transducer and activator of transcription 1, 91kDa                          |
| 9       | 10378068     | 1.7227144 | 2.3397758 | 0.2228566  | XAF1                            | XIAP associated factor 1                                                           |
| 9       | 10566366     | 1.7179298 | 2.3147196 | -0.0518948 | Trim30a/Trim30d                 | tripartite motif-containing 30A                                                    |
| 9       | 10533246     | 1.7111238 | 2.4574944 | 0.2578654  | OAS1                            | 2'-5' oligoadenylate synthetase 1, 40/46kDa                                        |
| 9       | 10490150     | 1.706555  | 3.1057082 | 0.1551604  | ZBP1                            | Z-DNA binding protein 1                                                            |
| 9       | 10538590     | 1.7048226 | 2.7449572 | 0.3294514  | HERC6                           | hect domain and RLD 6                                                              |
| 9       | 10574098     | 1.6705832 | 2.7335696 | 0.4907736  | Nlr5                            | NLR family, CARD domain containing 5                                               |
| 9       | 10450075     | 1.659463  | 2.7334578 | 0.673535   | HLA-C                           | major histocompatibility complex, class I, C                                       |
| 9       | 10450325     | 1.6577664 | 3.2779914 | 0.734277   | CFB                             | complement factor B                                                                |
| 9       | 10444814     | 1.6493638 | 2.7096858 | 0.7286634  | H2-Gs10                         | MHC class I like protein GS10                                                      |
| 9       | 10563597     | 1.592759  | 2.6958494 | -0.2240294 | SAA1                            | serum amyloid A1                                                                   |
| 9       | 10496539     | 1.5636138 | 2.6202612 | 0.526842   | GBP5                            | guanylate binding protein 5                                                        |
| 9       | 10398075     | 1.5247712 | 2.3072352 | 0.862975   | SERPINA3                        | serpin peptidase inhibitor, clade A (alpha-1 antitrypsin), member 3                |
| 9       | 10375515     | 1.511729  | 2.9587816 | 0.2477772  | Olfir56                         | olfactory receptor 56                                                              |
| 9       | 10574102     | 1.4913794 | 2.3381306 | 0.4186204  | Nlr5                            | NLR family, CARD domain containing 5                                               |
| 9       | 10439249     | 1.4881932 | 2.5694386 | 0.268583   | PARP14                          | poly (ADP-ribose) polymerase family, member 14                                     |
| 9       | 10512470     | 1.4672758 | 2.713331  | 0.8777808  | CD72                            | CD72 molecule                                                                      |

|   |          |           |           |            |                             |                                                                                           |
|---|----------|-----------|-----------|------------|-----------------------------|-------------------------------------------------------------------------------------------|
| 9 | 10531980 | 1.3998878 | 2.8079486 | 0.4323052  | GBP6                        | guanylate binding protein family, member 6                                                |
| 9 | 10444244 | 1.3898032 | 2.82886   | 0.3361584  | TAP1                        | transporter 1, ATP-binding cassette, sub-family B (MDR/TAP)                               |
| 9 | 10531420 | 1.373296  | 2.7521388 | 0.1020954  | CXCL11                      | chemokine (C-X-C motif) ligand 11                                                         |
| 9 | 10574135 | 1.3660986 | 2.7838982 | 0.3928514  | Nlrc5                       | NLR family, CARD domain containing 5                                                      |
| 9 | 10379633 | 1.3600938 | 2.6242244 | -0.0063712 | Slfn1                       | schlafen 1                                                                                |
| 9 | 10574104 | 1.3326482 | 2.4592106 | 0.43494    | Nlrc5                       | NLR family, CARD domain containing 5                                                      |
| 9 | 10552406 | 1.3129002 | 3.9631866 | 0.2317442  | NKG7                        | natural killer cell group 7 sequence                                                      |
| 9 | 10412211 | 1.3109074 | 2.7028486 | 0.043377   | GZMA                        | granzyme A (granzyme 1, cytotoxic T-lymphocyte-associated serine esterase 3)              |
| 9 | 10574139 | 1.266601  | 2.5442016 | 0.4044042  | Nlrc5                       | NLR family, CARD domain containing 5                                                      |
| 9 | 10389231 | 1.241656  | 2.6696048 | 0.5231642  | CCL3L1/CCL3L3               | chemokine (C-C motif) ligand 3-like 1                                                     |
| 9 | 10444258 | 1.2360028 | 3.1446588 | 0.310859   | PSMB8                       | proteasome (prosome, macropain) subunit, beta type, 8 (large multifunctional peptidase 7) |
| 9 | 10351509 | 1.1382366 | 3.2340278 | 0.5539904  | FCGR3A                      | Fc fragment of IgG, low affinity IIIa, receptor (CD16a)                                   |
| 9 | 10398039 | 1.1319066 | 3.09938   | 0.2524934  | Serpina3g (includes others) | serine (or cysteine) peptidase inhibitor, clade A, member 3G                              |
| 9 | 10590635 | 1.1121718 | 3.1067198 | 0.4734302  | CCR5                        | chemokine (C-C motif) receptor 5                                                          |
| 9 | 10598013 | 1.1121718 | 3.1067198 | 0.4734302  | CCR5                        | chemokine (C-C motif) receptor 5                                                          |
| 9 | 10598976 | 1.1008642 | 3.34966   | 0.202005   | TIMP1                       | TIMP metalloproteinase inhibitor 1                                                        |
| 9 | 10360173 | 1.0780114 | 2.6692734 | 0.5169692  | SLAMF7                      | SLAM family member 7                                                                      |
| 9 | 10517165 | 1.0225362 | 3.0034194 | 1.0157522  | CD52                        | CD52 molecule                                                                             |
| 9 | 10406928 | 0.9670856 | 2.8278394 | 0.9209294  | CD180                       | CD180 molecule                                                                            |
| 9 | 10379535 | 0.8391164 | 3.4532374 | 0.8826676  | CCL8                        | chemokine (C-C motif) ligand 8                                                            |
| 9 | 10461605 | 0.8125756 | 2.924889  | 0.2364798  | Ms444c (includes others)    | membrane-spanning 4-domains, subfamily A, member 4C                                       |

**Online Table 5. Gene list of cluster 15**

| Cluster | Probe Set ID | Day 4      | Day 7      | Day 60     | Symbol                   | Entrez Gene Name                                                               |
|---------|--------------|------------|------------|------------|--------------------------|--------------------------------------------------------------------------------|
| 15      | 10465840     | -2.2956392 | 0.5069734  | -0.1592758 | SCGB1A1                  | secretoglobin, family 1A, member 1 (uteroglobin)                               |
| 15      | 10477475     | -1.9624504 | 0.6485402  | 0.0085248  | PLUNC                    | palate, lung and nasal epithelium associated                                   |
| 15      | 10559698     | -1.5803518 | -0.5150376 | 0.2130634  |                          |                                                                                |
| 15      | 10384044     | -1.5290928 | -1.0592308 | -0.2904826 | MYL7                     | myosin, light chain 7, regulatory                                              |
| 15      | 10551293     | -1.5033586 | 0.132909   | -0.1104016 | CYP2F1                   | cytochrome P450, family 2, subfamily F, polypeptide 1                          |
| 15      | 10495306     | -1.4696242 | -0.8238158 | -0.2067764 | MYBPHL                   | myosin binding protein H-like                                                  |
| 15      | 10438813     | -1.461875  | -0.3215578 | -0.2862966 | Mir690                   | microRNA 690                                                                   |
| 15      | 10343452     | -1.3793982 | 0.4214158  | 0.477727   |                          |                                                                                |
| 15      | 10438801     | -1.272881  | -0.7286604 | -0.2572798 | FGF12                    | fibroblast growth factor 12                                                    |
| 15      | 10545569     | -1.2333692 | 0.0831254  | -0.055882  | REG3A                    | regenerating islet-derived 3 alpha                                             |
| 15      | 10341006     | -1.2295416 | 0.5526588  | 0.7657264  |                          |                                                                                |
| 15      | 10551226     | -1.092523  | 0.1502732  | 0.080991   | CYP2A6 (includes others) | cytochrome P450, family 2, subfamily A, polypeptide 6                          |
| 15      | 10340401     | -1.056792  | -0.2263494 | 0.1509078  |                          |                                                                                |
| 15      | 10581605     | -1.043173  | 0.0246328  | 0.0310348  | HP                       | haptoglobin                                                                    |
| 15      | 10490913     | -1.0196648 | -0.4262078 | -0.6297108 | CA3                      | carbonic anhydrase III, muscle specific                                        |
| 15      | 10558673     | -1.0071206 | -0.5332772 | -0.0576994 | CYP2E1                   | cytochrome P450, family 2, subfamily E, polypeptide 1                          |
| 15      | 10463551     | -1.0064976 | -0.8150412 | -0.4083922 | ELOVL3                   | elongation of very long chain fatty acids (FEN1/Elo2, SUR4/Elo3, yeast)-like 3 |
| 15      | 10467979     | -1.0015662 | -0.7415896 | -0.7367598 | SCD                      | stearoyl-CoA desaturase (delta-9-desaturase)                                   |
| 15      | 10585390     | -0.998934  | -0.2365078 | -0.233866  | SLN                      | sarcolipin                                                                     |
| 15      | 10344101     | -0.9953794 | 0.0645112  | -0.2127962 |                          |                                                                                |
| 15      | 10340043     | -0.9779604 | -0.3457098 | 0.0430692  |                          |                                                                                |
| 15      | 10584047     | -0.9581856 | -0.5313074 | -0.3420212 | ADAMTS8                  | ADAM metalloproteinase with thrombospondin type 1 motif, 8                     |
| 15      | 10339357     | -0.941271  | -0.3391036 | -0.1856724 |                          |                                                                                |
| 15      | 10339283     | -0.9412686 | 0.040212   | -0.0093682 |                          |                                                                                |
| 15      | 10364542     | -0.9295686 | -0.0475666 | -0.2764278 | CFD                      | complement factor D (adipsin)                                                  |
| 15      | 10342781     | -0.891894  | 0.0451544  | -0.0015708 |                          |                                                                                |
| 15      | 10393970     | -0.88474   | -0.3832922 | -0.165098  | FASN                     | fatty acid synthase                                                            |
| 15      | 10340912     | -0.8830934 | 0.1461882  | -0.14105   |                          |                                                                                |
| 15      | 10567010     | -0.8826092 | -0.5083008 | 0.2189958  | DKK3                     | dickkopf homolog 3 (Xenopus laevis)                                            |
| 15      | 10455015     | -0.8822134 | 0.1051976  | -0.0270132 | Vaultrc5                 | vault RNA component 5                                                          |
| 15      | 10555460     | -0.8815882 | -0.4265174 | -0.0482752 | STARD10                  | StAR-related lipid transfer (START) domain containing 10                       |
| 15      | 10423971     | -0.8711336 | -0.0461542 | 0.2713584  | PKHD1L1                  | polycystic kidney and hepatic disease 1 (autosomal recessive)-like 1           |
| 15      | 10544932     | -0.865147  | -0.5935824 | 0.7039278  | INMT                     | indolethylamine N-methyltransferase                                            |
| 15      | 10581011     | -0.8552584 | -0.6304278 | -0.2204044 |                          |                                                                                |
| 15      | 10342619     | -0.8527634 | 0.0910836  | -0.2701002 |                          |                                                                                |
| 15      | 10341442     | -0.8461204 | -0.161685  | 0.049025   |                          |                                                                                |
| 15      | 10359593     | -0.846087  | -0.6952236 | -0.0108932 | FMO3                     | flavin containing monooxygenase 3                                              |
| 15      | 10342202     | -0.8341682 | -0.1359126 | 0.0720194  |                          |                                                                                |
| 15      | 10341620     | -0.8332534 | -0.326992  | -0.2424374 |                          |                                                                                |
| 15      | 10338149     | -0.8285372 | 0.0771772  | -0.2625344 |                          |                                                                                |
| 15      | 10338338     | -0.8070274 | -0.0816116 | -0.0397952 |                          |                                                                                |
| 15      | 10339294     | -0.805873  | -0.2382392 | 0.109409   |                          |                                                                                |
| 15      | 10339847     | -0.8023556 | -0.2012496 | 0.488191   |                          |                                                                                |
| 15      | 10546929     | -0.8010954 | -0.3809128 | -0.3583322 | CIDEA                    | cell death-inducing DFFA-like effector c                                       |
| 15      | 10479852     | -0.8002542 | 0.2082754  | 0.1551466  | CAMK1D                   | calcium/calmodulin-dependent protein kinase ID                                 |
| 15      | 10341005     | -0.7999998 | -0.2713018 | -0.0929068 |                          |                                                                                |
| 15      | 10342355     | -0.7973892 | -0.2810516 | -0.377012  |                          |                                                                                |
| 15      | 10559694     | -0.7907846 | -0.243225  | 0.1487572  | SBK2                     | SH3-binding domain kinase family, member 2                                     |
| 15      | 10564203     | -0.7901094 | -0.219156  | -0.2525038 |                          |                                                                                |
| 15      | 10338296     | -0.7811626 | 0.0092496  | -0.1007944 |                          |                                                                                |
| 15      | 10476321     | -0.775281  | -0.2188836 | 0.2742436  | PRND                     | prion protein 2 (duplet)                                                       |
| 15      | 10344243     | -0.7749226 | 0.099985   | -0.1589342 |                          |                                                                                |
| 15      | 10375261     | -0.7743786 | -0.2073936 | 0.4387006  | GABRB2                   | gamma-aminobutyric acid (GABA) A receptor, beta 2                              |
| 15      | 10498852     | -0.7713674 | -0.240725  | -0.0728406 | RXFP1                    | relaxin/insulin-like family peptide receptor 1                                 |
| 15      | 10542983     | -0.7679158 | -0.3579208 | -0.1578324 | PON1                     | paraoxonase 1                                                                  |
| 15      | 10399407     | -0.766469  | -0.5161166 | -0.0276582 | VSNL1                    | visinin-like 1                                                                 |
| 15      | 10341860     | -0.766002  | -0.0136452 | 0.099293   |                          |                                                                                |
| 15      | 10342070     | -0.765101  | 0.077392   | -0.3484024 |                          |                                                                                |
| 15      | 10339977     | -0.7620848 | 0.2181792  | 0.4023774  |                          |                                                                                |
| 15      | 10512499     | -0.759286  | -0.354252  | -0.0057074 | TPM2                     | tropomyosin 2 (beta)                                                           |
| 15      | 10339214     | -0.7504284 | -0.040816  | -0.162133  |                          |                                                                                |
| 15      | 10341691     | -0.7487936 | -0.0073434 | -0.4036284 |                          |                                                                                |
| 15      | 10483131     | -0.7446606 | -0.233467  | 0.1928198  | KCNH7                    | potassium voltage-gated channel, subfamily H (eag-related), member 7           |
| 15      | 10357371     | -0.7415082 | -0.2376742 | 0.0072202  | TMEM163                  | transmembrane protein 163                                                      |
| 15      | 10559796     | -0.7391714 | -0.2200308 | 0.0916782  | PEG3                     | paternally expressed 3                                                         |
| 15      | 10339028     | -0.7383398 | -0.097584  | 0.1155432  |                          |                                                                                |
| 15      | 10342469     | -0.7342964 | -0.1719774 | 0.2388244  |                          |                                                                                |
| 15      | 10340743     | -0.7324662 | 0.1324836  | 0.0606104  |                          |                                                                                |
| 15      | 10349947     | -0.7294244 | -0.586905  | 0.14617    | FMOD                     | fibromodulin                                                                   |
| 15      | 10342257     | -0.728917  | -0.3162386 | 0.3090518  |                          |                                                                                |
| 15      | 10526441     | -0.7285922 | -0.2112744 | 0.0366402  | UPK3B                    | uroplakin 3B                                                                   |
| 15      | 10343426     | -0.725131  | -0.171054  | 0.260365   |                          |                                                                                |
| 15      | 10371740     | -0.7243954 | 0.0534942  | 0.1366136  | ANO4                     | anoctamin 4                                                                    |
| 15      | 10545180     | -0.717027  | 0.117737   | 0.283135   |                          |                                                                                |
| 15      | 10514939     | -0.713054  | -0.1509262 | 0.2566822  | PODN                     | podocan                                                                        |
| 15      | 10439500     | -0.7055502 | 0.0297604  | 0.0167674  | UPK1B                    | uroplakin 1B                                                                   |

|    |          |            |            |            |               |                                                                                          |
|----|----------|------------|------------|------------|---------------|------------------------------------------------------------------------------------------|
| 15 | 10344523 | -0.7003158 | -0.2100398 | -0.2264324 |               |                                                                                          |
| 15 | 10339818 | -0.6978396 | 0.0627052  | 0.1002826  |               |                                                                                          |
| 15 | 10344365 | -0.6927648 | -0.363878  | 0.1490812  |               |                                                                                          |
| 15 | 10434747 | -0.6911724 | -0.4027102 | -0.44772   | ADIPOQ        | adiponectin, C1Q and collagen domain containing                                          |
| 15 | 10338826 | -0.6868322 | 0.2527106  | 0.0771428  |               |                                                                                          |
| 15 | 10578986 | -0.6849572 | -0.3329448 | 0.1572596  | PSD3          | pleckstrin and Sec7 domain containing 3                                                  |
| 15 | 10462435 | -0.6832826 | -0.2263314 | 0.1227912  | MLANA         | melan-A                                                                                  |
| 15 | 10549877 | -0.6816468 | -0.2826532 | 0.0500024  |               |                                                                                          |
| 15 | 10339284 | -0.6814454 | -0.1330862 | 0.1275216  |               |                                                                                          |
| 15 | 10375259 | -0.6777006 | -0.2298238 | 0.706073   | GABRB2        | gamma-aminobutyric acid (GABA) A receptor, beta 2                                        |
| 15 | 10463355 | -0.6751864 | 0.007469   | 0.1176028  | Scd2          | stearoyl-Coenzyme A desaturase 2                                                         |
| 15 | 10361186 | -0.6731044 | -0.2319286 | 0.1385664  | SERTAD4       | SERTA domain containing 4                                                                |
| 15 | 10341583 | -0.672145  | -0.15081   | -0.005701  |               |                                                                                          |
| 15 | 10454807 | -0.6718818 | -0.154624  | 0.0892842  | SNORA74A      | small nucleolar RNA, H/ACA box 74A                                                       |
| 15 | 10604576 | -0.6672268 | -0.4279352 | -0.0103998 | GPC3          | glypican 3                                                                               |
| 15 | 10342753 | -0.661519  | -0.0742532 | -0.0553512 |               |                                                                                          |
| 15 | 10342029 | -0.6597642 | 0.1923698  | -0.046069  |               |                                                                                          |
| 15 | 10343059 | -0.6576826 | -0.0770446 | 0.0266754  |               |                                                                                          |
| 15 | 10476353 | -0.6566752 | -0.1671524 | 0.3916594  |               |                                                                                          |
| 15 | 10476401 | -0.656306  | -0.0500812 | 0.3150764  | PLCB1         | phospholipase C, beta 1 (phosphoinositide-specific)                                      |
| 15 | 10341599 | -0.6544618 | 0.0154676  | 0.299438   |               |                                                                                          |
| 15 | 10341210 | -0.6528634 | -0.1732748 | -0.0039846 |               |                                                                                          |
| 15 | 10531100 | -0.6492672 | 0.0680276  | -0.0307268 | Sult1d1       | sulfotransferase family 1D, member 1                                                     |
| 15 | 10341772 | -0.6475636 | -0.0756704 | 0.0323998  |               |                                                                                          |
| 15 | 10341621 | -0.6474788 | -0.409102  | -0.1624958 |               |                                                                                          |
| 15 | 10338312 | -0.6452806 | -0.1888264 | 0.507192   |               |                                                                                          |
| 15 | 10339263 | -0.6447964 | -0.1647512 | -0.0662924 |               |                                                                                          |
| 15 | 10343106 | -0.6415206 | 0.15405    | 0.504682   |               |                                                                                          |
| 15 | 10358531 | -0.6365948 | -0.2055716 | 0.4162144  | Hmnl          | hemocentin 1                                                                             |
| 15 | 10343336 | -0.635782  | 0.166135   | 0.151082   |               |                                                                                          |
| 15 | 10341318 | -0.6351848 | -0.1335428 | 0.238071   |               |                                                                                          |
| 15 | 10341438 | -0.6329922 | -0.0391888 | -0.1007348 |               |                                                                                          |
| 15 | 10343900 | -0.6305448 | -0.0680562 | -0.0452292 |               |                                                                                          |
| 15 | 10342433 | -0.6302448 | -0.4435564 | 0.2766938  |               |                                                                                          |
| 15 | 10339979 | -0.6263072 | -0.0941376 | -0.1343062 |               |                                                                                          |
| 15 | 10523376 | -0.6255668 | 0.0264256  | 0.1390666  | FRAS1         | Fraser syndrome 1                                                                        |
| 15 | 10342203 | -0.6251876 | -0.1605242 | 0.0237994  |               |                                                                                          |
| 15 | 10344223 | -0.6150312 | -0.064594  | -0.0061608 |               |                                                                                          |
| 15 | 10340398 | -0.6141948 | -0.085211  | 0.0088488  |               |                                                                                          |
| 15 | 10339644 | -0.613872  | -0.0354892 | -0.039445  |               |                                                                                          |
| 15 | 10341350 | -0.6121466 | -0.2180362 | 0.0148188  |               |                                                                                          |
| 15 | 10341610 | -0.6098502 | 0.0402924  | 0.0109952  |               |                                                                                          |
| 15 | 10344569 | -0.6075752 | 0.0306298  | 0.2473168  |               |                                                                                          |
| 15 | 10340504 | -0.6052114 | 0.115599   | 0.0431448  |               |                                                                                          |
| 15 | 10338153 | -0.6043226 | -0.2610942 | -0.2737684 |               |                                                                                          |
| 15 | 10339554 | -0.6038936 | -0.0582088 | -0.0771268 |               |                                                                                          |
| 15 | 10338362 | -0.6032732 | -0.4120548 | -0.0040402 |               |                                                                                          |
| 15 | 10564183 | -0.6026968 | -0.1842118 | -0.2242214 | PWCR1         | small nucleolar RNA, C/D box 116 cluster                                                 |
| 15 | 10343835 | -0.602062  | -0.0751876 | 0.1600992  |               |                                                                                          |
| 15 | 10571815 | -0.6020494 | -0.1630078 | 0.5179504  | GPM6A         | glycoprotein M6A                                                                         |
| 15 | 10564161 | -0.6018794 | -0.241563  | -0.2066542 | PWCR1         | small nucleolar RNA, C/D box 116 cluster                                                 |
| 15 | 10344161 | -0.60183   | -0.036852  | 0.124944   |               |                                                                                          |
| 15 | 10502805 | -0.5995024 | -0.2544794 | 0.1432198  | PTGFR         | prostaglandin F receptor (FP)                                                            |
| 15 | 10399908 | -0.5991376 | -0.4501954 | -0.1050954 | PRKAR2B       | protein kinase, cAMP-dependent, regulatory, type II, beta                                |
| 15 | 10427796 | -0.5984588 | -0.2948742 | 0.25344    | NPR3          | natriuretic peptide receptor C/guanylate cyclase C (atrionatriuretic peptide receptor C) |
| 15 | 10564177 | -0.5981568 | -0.2496334 | -0.245196  | PWCR1         | small nucleolar RNA, C/D box 116 cluster                                                 |
| 15 | 10460253 | -0.5981044 | -0.2727442 | 0.12765    | Aldh3b2       | aldehyde dehydrogenase 3 family, member B2                                               |
| 15 | 10342681 | -0.595462  | 0.206372   | -0.017176  |               |                                                                                          |
| 15 | 10599530 | -0.5952852 | -0.3725764 | -0.208679  | RAB33A        | RAB33A, member RAS oncogene family                                                       |
| 15 | 10537062 | -0.5947484 | -0.1443504 | 0.1652448  | MEST          | mesoderm specific transcript homolog (mouse)                                             |
| 15 | 10340697 | -0.5936514 | -0.480459  | 0.4308308  |               |                                                                                          |
| 15 | 10352916 | -0.5936212 | -0.0993702 | 0.0840374  | A330023F24Rik | RIKEN cDNA A330023F24 gene                                                               |
| 15 | 10564163 | -0.593094  | -0.2315066 | -0.2668876 | PWCR1         | small nucleolar RNA, C/D box 116 cluster                                                 |
| 15 | 10564167 | -0.593094  | -0.2315066 | -0.2668876 | PWCR1         | small nucleolar RNA, C/D box 116 cluster                                                 |
| 15 | 10564171 | -0.593094  | -0.2315066 | -0.2668876 | PWCR1         | small nucleolar RNA, C/D box 116 cluster                                                 |
| 15 | 10564173 | -0.593094  | -0.2315066 | -0.2668876 | PWCR1         | small nucleolar RNA, C/D box 116 cluster                                                 |
| 15 | 10564175 | -0.593094  | -0.2315066 | -0.2668876 | PWCR1         | small nucleolar RNA, C/D box 116 cluster                                                 |
| 15 | 10564179 | -0.593094  | -0.2315066 | -0.2668876 | PWCR1         | small nucleolar RNA, C/D box 116 cluster                                                 |
| 15 | 10564181 | -0.593094  | -0.2315066 | -0.2668876 | PWCR1         | small nucleolar RNA, C/D box 116 cluster                                                 |
| 15 | 10564185 | -0.593094  | -0.2315066 | -0.2668876 | PWCR1         | small nucleolar RNA, C/D box 116 cluster                                                 |
| 15 | 10564187 | -0.593094  | -0.2315066 | -0.2668876 | PWCR1         | small nucleolar RNA, C/D box 116 cluster                                                 |
| 15 | 10564189 | -0.593094  | -0.2315066 | -0.2668876 | PWCR1         | small nucleolar RNA, C/D box 116 cluster                                                 |
| 15 | 10564191 | -0.593094  | -0.2315066 | -0.2668876 | PWCR1         | small nucleolar RNA, C/D box 116 cluster                                                 |
| 15 | 10564193 | -0.593094  | -0.2315066 | -0.2668876 | PWCR1         | small nucleolar RNA, C/D box 116 cluster                                                 |
| 15 | 10564195 | -0.593094  | -0.2315066 | -0.2668876 | PWCR1         | small nucleolar RNA, C/D box 116 cluster                                                 |
| 15 | 10564197 | -0.593094  | -0.2315066 | -0.2668876 | PWCR1         | small nucleolar RNA, C/D box 116 cluster                                                 |
| 15 | 10564199 | -0.593094  | -0.2315066 | -0.2668876 | PWCR1         | small nucleolar RNA, C/D box 116 cluster                                                 |
| 15 | 10564201 | -0.593094  | -0.2315066 | -0.2668876 | PWCR1         | small nucleolar RNA, C/D box 116 cluster                                                 |
| 15 | 10564205 | -0.593094  | -0.2315066 | -0.2668876 | PWCR1         | small nucleolar RNA, C/D box 116 cluster                                                 |
| 15 | 10564207 | -0.593094  | -0.2315066 | -0.2668876 | PWCR1         | small nucleolar RNA, C/D box 116 cluster                                                 |
| 15 | 10339683 | -0.5927726 | -0.0019282 | 0.417323   |               |                                                                                          |
| 15 | 10340830 | -0.5918724 | 0.1879816  | -0.1568012 |               |                                                                                          |
| 15 | 10342181 | -0.589525  | 0.182476   | -0.178547  |               |                                                                                          |
| 15 | 10338929 | -0.589183  | 0.0181158  | 0.1578098  |               |                                                                                          |

|    |          |            |            |            |                          |                                                                                         |
|----|----------|------------|------------|------------|--------------------------|-----------------------------------------------------------------------------------------|
| 15 | 10564159 | -0.5878142 | -0.193827  | -0.2370974 | PWCR1                    | small nucleolar RNA, C/D box 116 cluster                                                |
| 15 | 10341619 | -0.5862432 | -0.4147102 | 0.064426   |                          |                                                                                         |
| 15 | 10343114 | -0.5846328 | -0.243109  | -0.1247486 |                          |                                                                                         |
| 15 | 10342316 | -0.583578  | -0.2806516 | 0.0934592  |                          |                                                                                         |
| 15 | 10387797 | -0.5802202 | 0.1830602  | -0.1532592 | BCL6B                    | B-cell CLL/lymphoma 6, member B                                                         |
| 15 | 10376778 | -0.5797336 | -0.2714492 | 0.0990338  | MFAP4                    | microfibrillar-associated protein 4                                                     |
| 15 | 10338854 | -0.5783688 | -0.0129544 | 0.1750374  |                          |                                                                                         |
| 15 | 10343102 | -0.5776454 | -0.0534068 | 0.0021764  |                          |                                                                                         |
| 15 | 10339897 | -0.5752488 | 0.1842976  | -0.1179972 |                          |                                                                                         |
| 15 | 10341190 | -0.5709786 | 0.0624272  | 0.108368   |                          |                                                                                         |
| 15 | 10356154 | -0.5709158 | -0.0836988 | 0.0999184  | SPHKAP                   | SPHK1 interactor, AKAP domain containing                                                |
| 15 | 10341781 | -0.57091   | -0.2926012 | 0.1445288  |                          |                                                                                         |
| 15 | 10338538 | -0.5689276 | -0.1551536 | -0.2185734 |                          |                                                                                         |
| 15 | 10343772 | -0.5687894 | 0.012318   | 0.3778168  |                          |                                                                                         |
| 15 | 10525076 | -0.5685774 | -0.2203972 | 0.4024862  | SDS                      | serine dehydratase                                                                      |
| 15 | 10343484 | -0.5674898 | -0.0904158 | -0.0072704 |                          |                                                                                         |
| 15 | 10445078 | -0.5632046 | -0.2880596 | -0.2215066 | GABBR1                   | gamma-aminobutyric acid (GABA) B receptor, 1                                            |
| 15 | 10343055 | -0.5578384 | -0.3197886 | 0.223676   |                          |                                                                                         |
| 15 | 10340900 | -0.5536864 | -0.068072  | 0.0694474  |                          |                                                                                         |
| 15 | 10502770 | -0.5529858 | -0.0842992 | 0.2460052  | LPHN2                    | latrophilin 2                                                                           |
| 15 | 10338389 | -0.5524678 | -0.2582182 | 0.2454212  |                          |                                                                                         |
| 15 | 10593123 | -0.5520694 | -0.4458724 | -0.0102698 | TAGLN                    | transgelin                                                                              |
| 15 | 10578989 | -0.5514234 | -0.1628992 | 0.0860516  | PSD3                     | pleckstrin and Sec7 domain containing 3                                                 |
| 15 | 10340392 | -0.550297  | -0.3547862 | 0.0755544  |                          |                                                                                         |
| 15 | 10572070 | -0.5492288 | -0.3876624 | 0.40219    | NPY1R                    | neuropeptide Y receptor Y1                                                              |
| 15 | 10374929 | -0.5488596 | -0.287085  | 0.2545858  | LOC100289085             | protein fem-1 homolog A-like                                                            |
| 15 | 10524308 | -0.5487498 | -0.295248  | 0.0570668  | Mir701                   | microRNA 701                                                                            |
| 15 | 10342934 | -0.5486424 | -0.2061196 | 0.2065986  |                          |                                                                                         |
| 15 | 10341540 | -0.5482438 | 0.1488496  | 0.4171384  |                          |                                                                                         |
| 15 | 10428302 | -0.54528   | -0.2563392 | 0.1533626  | KLF10                    | Kruppel-like factor 10                                                                  |
| 15 | 10344018 | -0.5439694 | -0.3235654 | 0.122912   |                          |                                                                                         |
| 15 | 10355500 | -0.5436762 | -0.1624658 | -0.01942   | IGFBP5                   | insulin-like growth factor binding protein 5                                            |
| 15 | 10341157 | -0.5417404 | -0.227787  | -0.1421526 |                          |                                                                                         |
| 15 | 10397835 | -0.5391888 | -0.0739312 | 0.1564226  | SLC24A4                  | solute carrier family 24 (sodium/potassium/calcium exchanger), member 4                 |
| 15 | 10486403 | -0.5368332 | 0.006502   | 0.1314696  | PLA2G4E                  | phospholipase A2, group IVE                                                             |
| 15 | 10342772 | -0.5356348 | -0.290951  | 0.1621438  |                          |                                                                                         |
| 15 | 10358577 | -0.5341718 | -0.0636786 | 0.3990358  | Hmcn1                    | hemimentin 1                                                                            |
| 15 | 10572378 | -0.5341268 | -0.4250414 | 0.538208   | COMP                     | cartilage oligomeric matrix protein                                                     |
| 15 | 10505438 | -0.5338752 | -0.3108636 | -0.1614116 | ORM1/ORM2                | orosomucoid 1                                                                           |
| 15 | 10342773 | -0.5316084 | 0.0171828  | -0.0059806 |                          |                                                                                         |
| 15 | 10395103 | -0.5313978 | 0.1330212  | 0.1052046  | PXDN                     | peroxidasin homolog (Drosophila)                                                        |
| 15 | 10343370 | -0.5312452 | 0.0412164  | -0.179915  |                          |                                                                                         |
| 15 | 10411519 | -0.5288676 | 0.0688928  | 0.160208   | MAP1B                    | microtubule-associated protein 1B                                                       |
| 15 | 10341246 | -0.528814  | -0.0157192 | 0.3693832  |                          |                                                                                         |
| 15 | 10478525 | -0.5275228 | -0.074484  | -0.1244834 | WFDC2                    | WAP four-disulfide core domain 2                                                        |
| 15 | 10340739 | -0.526661  | 0.0681462  | 0.0203622  |                          |                                                                                         |
| 15 | 10474064 | -0.524422  | -0.039046  | 0.0113192  | TP53I1                   | tumor protein p53 inducible protein 11                                                  |
| 15 | 10338437 | -0.5228256 | 0.1444666  | 0.0568242  |                          |                                                                                         |
| 15 | 10586718 | -0.5224748 | -0.2101674 | 0.2898426  | 9530091C08Rik            | RIKEN cDNA 9530091C08 gene                                                              |
| 15 | 10338450 | -0.5221092 | -0.3192872 | 0.189177   |                          |                                                                                         |
| 15 | 10601519 | -0.5218808 | 0.0107242  | 0.2787996  | KLHL4                    | kelch-like 4 (Drosophila)                                                               |
| 15 | 10343949 | -0.5216276 | 0.1507026  | -0.1197944 |                          |                                                                                         |
| 15 | 10342816 | -0.5214536 | -0.3104336 | -0.202339  |                          |                                                                                         |
| 15 | 10358529 | -0.5187262 | -0.1621222 | 0.354732   | Hmcn1                    | hemimentin 1                                                                            |
| 15 | 10551282 | -0.5160582 | 0.0444344  | 0.0168864  | CYP2A6 (includes others) | cytochrome P450, family 2, subfamily A, polypeptide 6                                   |
| 15 | 10344216 | -0.514146  | -0.2708818 | 0.015782   |                          |                                                                                         |
| 15 | 10427125 | -0.5135312 | -0.2942712 | 0.0409294  | IGFBP6                   | insulin-like growth factor binding protein 6                                            |
| 15 | 10343834 | -0.512598  | -0.1688934 | 0.2423448  |                          |                                                                                         |
| 15 | 10341468 | -0.511433  | -0.288258  | 0.1785044  |                          |                                                                                         |
| 15 | 10343498 | -0.510802  | -0.3197762 | 0.4931538  |                          |                                                                                         |
| 15 | 10342547 | -0.5107824 | -0.0970698 | 0.161848   |                          |                                                                                         |
| 15 | 10344274 | -0.5105182 | 0.0316052  | 0.21227    |                          |                                                                                         |
| 15 | 10369702 | -0.5105026 | -0.0687848 | 0.1223294  | TET1                     | tet oncogene 1                                                                          |
| 15 | 10339013 | -0.5087892 | 0.1287268  | -0.0409896 |                          |                                                                                         |
| 15 | 10596148 | -0.5073158 | -0.4017566 | 0.1319624  | TF                       | transferrin                                                                             |
| 15 | 10339943 | -0.5064012 | 0.0808442  | 0.0287998  |                          |                                                                                         |
| 15 | 10472398 | -0.5047618 | -0.0299858 | 0.0886018  | SCN2A                    | sodium channel, voltage-gated, type II, alpha subunit                                   |
| 15 | 10374202 | -0.5043794 | -0.0724094 | -0.1038296 | ADCY1                    | adenylate cyclase 1 (brain)                                                             |
| 15 | 10339646 | -0.5036946 | 0.009057   | -0.0375272 |                          |                                                                                         |
| 15 | 10459905 | -0.5018498 | 0.1307     | 0.0904772  | SETBP1                   | SET binding protein 1                                                                   |
| 15 | 10513420 | -0.5012336 | -0.1280988 | -0.060874  | Mup1 (includes others)   | major urinary protein 1                                                                 |
| 15 | 10477069 | -0.5012002 | -0.1828464 | 0.0365854  | TCF15                    | transcription factor 15 (basic helix-loop-helix)                                        |
| 15 | 10358515 | -0.5009404 | 0.152703   | 0.3434002  | Hmcn1                    | hemimentin 1                                                                            |
| 15 | 10358621 | -0.5004512 | -0.1075242 | 0.229847   | Hmcn1                    | hemimentin 1                                                                            |
| 15 | 10355403 | -0.4995658 | 0.060508   | 0.4579366  | FNI                      | fibronectin 1                                                                           |
| 15 | 10340037 | -0.496505  | -6.32E-05  | 0.1552282  |                          |                                                                                         |
| 15 | 10358527 | -0.4963606 | -0.2105526 | 0.3798042  | Hmcn1                    | hemimentin 1                                                                            |
| 15 | 10341272 | -0.4955972 | -0.2600412 | 0.0591286  |                          |                                                                                         |
| 15 | 10547404 | -0.4955278 | -0.0343426 | 0.2015428  | ERC1                     | ELKS/RAB6-interacting/CAST family member 1                                              |
| 15 | 10495206 | -0.495076  | -0.054637  | 0.3853118  | SLC16A4                  | solute carrier family 16, member 4 (monocarboxylic acid transporter 5)                  |
| 15 | 10341830 | -0.4935744 | 0.0813578  | 0.1701708  |                          |                                                                                         |
| 15 | 10340889 | -0.49345   | -0.2209052 | -0.0115394 |                          |                                                                                         |
| 15 | 10552857 | -0.4916616 | -0.320385  | -0.1318964 | SLC17A7                  | solute carrier family 17 (sodium-dependent inorganic phosphate cotransporter), member 7 |

|    |          |            |            |            |                        |                                                                                       |
|----|----------|------------|------------|------------|------------------------|---------------------------------------------------------------------------------------|
| 15 | 10504137 | -0.4914844 | -0.1705168 | 0.239486   | ENSMUSG00000073868     | predicted gene 10590                                                                  |
| 15 | 10504201 | -0.4914844 | -0.1705168 | 0.239486   | ENSMUSG00000073868     | predicted gene 10590                                                                  |
| 15 | 10512350 | -0.4914844 | -0.1705168 | 0.239486   | 4933409K07Rik          | RIKEN cDNA 4933409K07 gene                                                            |
| 15 | 10512352 | -0.4914844 | -0.1705168 | 0.239486   | ENSMUSG00000073868     | predicted gene 10590                                                                  |
| 15 | 10522024 | -0.4906026 | 0.0099836  | 0.022899   | TBC1D1                 | TBC1 (tre-2/USP6, BUB2, cdc16) domain family, member 1                                |
| 15 | 10537296 | -0.4899162 | 0.0020456  | 0.0055712  | mir-490                | microRNA 490                                                                          |
| 15 | 10569618 | -0.4898964 | -0.2219676 | 0.1293174  | ANO1                   | anoctamin 1, calcium activated chloride channel                                       |
| 15 | 10342519 | -0.4898032 | -0.1330716 | 0.364536   |                        |                                                                                       |
| 15 | 10339493 | -0.4895916 | -0.0902304 | -0.1528628 |                        |                                                                                       |
| 15 | 10458764 | -0.4892398 | -0.0333594 | -0.0272702 |                        |                                                                                       |
| 15 | 10418506 | -0.488914  | -0.0430702 | 0.1473962  | STAB1                  | stabilin 1                                                                            |
| 15 | 10340336 | -0.4884332 | 0.0572964  | -0.1072362 |                        |                                                                                       |
| 15 | 10343470 | -0.4881638 | -0.3156976 | 0.2381994  |                        |                                                                                       |
| 15 | 10360418 | -0.4860076 | -0.2445636 | 0.1174414  | RGS7                   | regulator of G-protein signaling 7                                                    |
| 15 | 10495285 | -0.4856428 | -0.207142  | 0.0373982  | SORT1                  | sortilin 1                                                                            |
| 15 | 10344573 | -0.4846726 | -0.0528472 | 0.3985652  |                        |                                                                                       |
| 15 | 10339861 | -0.484644  | -0.0013196 | 0.3051692  |                        |                                                                                       |
| 15 | 10339231 | -0.4844578 | 0.1155618  | 0.0432108  |                        |                                                                                       |
| 15 | 10559702 | -0.4835648 | 0.110475   | 0.092486   | ZNF579                 | zinc finger protein 579                                                               |
| 15 | 10339179 | -0.48352   | 0.021374   | 0.2813186  |                        |                                                                                       |
| 15 | 10338736 | -0.4821186 | 0.0492548  | 0.3745982  |                        |                                                                                       |
| 15 | 10342333 | -0.4807066 | -0.2527356 | -0.0572074 |                        |                                                                                       |
| 15 | 10391036 | -0.480433  | -0.0646436 | 0.0127948  | Krt19                  | keratin 19                                                                            |
| 15 | 10340309 | -0.479189  | -0.1065724 | 0.1240324  |                        |                                                                                       |
| 15 | 10358533 | -0.477346  | -0.1884918 | 0.3563526  | Hmcn1                  | hemicentin 1                                                                          |
| 15 | 10339087 | -0.4755778 | -0.4057834 | 0.2801968  |                        |                                                                                       |
| 15 | 10518781 | -0.475147  | -0.0898828 | 0.4661848  | PER3                   | period homolog 3 (Drosophila)                                                         |
| 15 | 10339896 | -0.474165  | -0.2111804 | 0.0431722  |                        |                                                                                       |
| 15 | 10338981 | -0.4736194 | -0.174735  | -0.078084  |                        |                                                                                       |
| 15 | 10472757 | -0.4733682 | -0.1782552 | 0.1310222  | CYBRD1                 | cytochrome b reductase 1                                                              |
| 15 | 10348299 | -0.4724384 | -0.1052132 | -0.0111792 | 5830472F04Rik          | RIKEN cDNA 5830472F04 gene                                                            |
| 15 | 10578207 | -0.4717056 | 0.0121318  | 0.2870122  | LONRF1                 | LON peptidase N-terminal domain and ring finger 1                                     |
| 15 | 10343317 | -0.4715052 | -0.0218298 | -0.003351  |                        |                                                                                       |
| 15 | 10343606 | -0.4714186 | 0.0238078  | 0.0478108  |                        |                                                                                       |
| 15 | 10340802 | -0.46941   | -0.1244284 | 0.2781372  |                        |                                                                                       |
| 15 | 10338255 | -0.468918  | -0.1379084 | 0.1576414  |                        |                                                                                       |
| 15 | 10343998 | -0.4688786 | -0.164483  | 0.0509916  |                        |                                                                                       |
| 15 | 10341625 | -0.4686234 | -0.1121662 | -0.0317636 |                        |                                                                                       |
| 15 | 10339395 | -0.4681412 | -0.0390346 | 0.248171   |                        |                                                                                       |
| 15 | 10338494 | -0.467775  | 0.0919058  | -0.0441702 |                        |                                                                                       |
| 15 | 10341688 | -0.4672728 | 0.1101452  | 0.3750346  |                        |                                                                                       |
| 15 | 10340942 | -0.4666964 | 0.109623   | 0.1451346  |                        |                                                                                       |
| 15 | 10338822 | -0.4662164 | -0.2424192 | 0.0056498  |                        |                                                                                       |
| 15 | 10494548 | -0.4661592 | 0.116879   | 0.0687426  | GJA5                   | gap junction protein, alpha 5, 40kDa                                                  |
| 15 | 10339988 | -0.465986  | -0.0423416 | 0.038215   |                        |                                                                                       |
| 15 | 10425799 | -0.4634066 | -0.1795578 | -0.1422542 | RNU12                  | RNA, U12 small nuclear                                                                |
| 15 | 10441813 | -0.4625452 | -0.0585852 | 0.003301   | Snora20                | small nuclear RNA, H/ACA box 20                                                       |
| 15 | 10502783 | -0.4624324 | -0.06917   | 0.1346768  | Gm9912                 | predicted gene 9912                                                                   |
| 15 | 10588592 | -0.4624258 | -0.3715388 | 0.0141932  | CACNA2D2               | calcium channel, voltage-dependent, alpha 2/delta subunit 2                           |
| 15 | 10585982 | -0.4621548 | 0.0223794  | 0.1571454  | MYO9A                  | myosin IXA                                                                            |
| 15 | 10538408 | -0.4619636 | -0.4376616 | 0.2377674  | C7orf41                | chromosome 7 open reading frame 41                                                    |
| 15 | 10343388 | -0.4617446 | -0.2157948 | 0.0719972  |                        |                                                                                       |
| 15 | 10395201 | -0.4603808 | -0.1306144 | -0.1119378 | SLC26A3                | solute carrier family 26, member 3                                                    |
| 15 | 10338226 | -0.4594242 | -0.1082558 | 0.1570382  |                        |                                                                                       |
| 15 | 10383731 | -0.4593718 | -0.229204  | 0.0137558  | SMTN                   | smoothenin                                                                            |
| 15 | 10513472 | -0.4593682 | -0.1272044 | -0.049519  | Mup1 (includes others) | major urinary protein 1                                                               |
| 15 | 10340569 | -0.459244  | -0.088217  | 0.0491702  |                        |                                                                                       |
| 15 | 10339019 | -0.4579408 | -0.3504302 | 0.3355804  |                        |                                                                                       |
| 15 | 10339544 | -0.4574282 | 0.035807   | 0.316243   |                        |                                                                                       |
| 15 | 10358517 | -0.4554662 | -0.0100392 | 0.3110802  | Hmcn1                  | hemicentin 1                                                                          |
| 15 | 10599696 | -0.4553666 | 0.0640964  | 0.1841906  | DDX26B                 | DEAD/H (Asp-Glu-Ala-Asp/His) box polypeptide 26B                                      |
| 15 | 10471721 | -0.454629  | -0.3796134 | 0.2281408  | PTGS1                  | prostaglandin-endoperoxide synthase 1 (prostaglandin G/H synthase and cyclooxygenase) |
| 15 | 10338169 | -0.453847  | -0.0703328 | -0.119985  |                        |                                                                                       |
| 15 | 10358549 | -0.4529196 | -0.0819464 | 0.450674   | Hmcn1                  | hemicentin 1                                                                          |
| 15 | 10586722 | -0.4526796 | -0.106645  | 0.2476708  | F830001A07Rik          | RIKEN cDNA F830001A07 gene                                                            |
| 15 | 10358575 | -0.4526128 | -0.1450598 | 0.3928966  | Hmcn1                  | hemicentin 1                                                                          |
| 15 | 10358656 | -0.4517864 | 0.0203552  | 0.4445454  | Hmcn1                  | hemicentin 1                                                                          |
| 15 | 10396606 | -0.4514894 | -0.0493434 | 0.1335     | SYNE2                  | spectrin repeat containing, nuclear envelope 2                                        |
| 15 | 10344166 | -0.4511974 | -0.342465  | 0.097029   |                        |                                                                                       |
| 15 | 10343190 | -0.4509566 | -0.1833448 | -0.0824146 |                        |                                                                                       |
| 15 | 10396936 | -0.450783  | -0.3529578 | 0.020492   | SMOC1                  | SPARC related modular calcium binding 1                                               |
| 15 | 10343438 | -0.4503734 | -0.0436154 | -0.0694042 |                        |                                                                                       |
| 15 | 10525030 | -0.4483902 | -0.1710602 | -0.0287152 | TBX5                   | T-box 5                                                                               |
| 15 | 10341287 | -0.447455  | -0.2913028 | 0.1028708  |                        |                                                                                       |
| 15 | 10467319 | -0.4466646 | -0.2159646 | -0.1304528 | RBP4                   | retinol binding protein 4, plasma                                                     |
| 15 | 10590267 | -0.4438492 | -0.1258352 | 0.0301786  | SNORA62                | small nuclear RNA, H/ACA box 62                                                       |
| 15 | 10519527 | -0.4434186 | -0.1263726 | 0.240507   | ABCB1                  | ATP-binding cassette, sub-family B (MDR/TAP), member 1                                |
| 15 | 10494413 | -0.4421264 | -0.0946072 | 0.0411978  | Rnu1b2                 | U1b2 small nuclear RNA                                                                |
| 15 | 10494421 | -0.4421264 | -0.0946072 | 0.0411978  | Rnu1b2                 | U1b2 small nuclear RNA                                                                |
| 15 | 10500343 | -0.4421264 | -0.0946072 | 0.0411978  | Rnu1b2                 | U1b2 small nuclear RNA                                                                |
| 15 | 10500358 | -0.4421264 | -0.0946072 | 0.0411978  | Rnu1b2                 | U1b2 small nuclear RNA                                                                |
| 15 | 10512937 | -0.4421264 | -0.0946072 | 0.0411978  | Rnu1b2                 | U1b2 small nuclear RNA                                                                |

|    |          |            |            |            |                            |                                                                                         |
|----|----------|------------|------------|------------|----------------------------|-----------------------------------------------------------------------------------------|
| 15 | 10340257 | -0.4420148 | -0.0619408 | 0.0714312  |                            |                                                                                         |
| 15 | 10379344 | -0.4400408 | -0.195761  | -0.0065278 | Gm10387                    | predicted gene 10387                                                                    |
| 15 | 10358535 | -0.4399056 | -0.1955388 | 0.3365866  | Hmcn1                      | hemimentin 1                                                                            |
| 15 | 10340339 | -0.4378502 | -0.0412488 | 0.236903   |                            |                                                                                         |
| 15 | 10343557 | -0.43785   | -0.173654  | 0.1795968  |                            |                                                                                         |
| 15 | 10343308 | -0.4378084 | -0.2769808 | -0.056518  |                            |                                                                                         |
| 15 | 10508723 | -0.4369044 | -0.1437388 | 0.0309766  | Snora61                    | small nucleolar RNA, H/ACA box 61                                                       |
| 15 | 10378401 | -0.4366566 | -0.264627  | 0.096374   |                            |                                                                                         |
| 15 | 10341861 | -0.4348926 | -0.2154898 | -0.0935654 |                            |                                                                                         |
| 15 | 10343177 | -0.4342074 | 0.0167368  | -0.0939954 |                            |                                                                                         |
| 15 | 10358541 | -0.4341392 | -0.0834404 | 0.420207   | Hmcn1                      | hemimentin 1                                                                            |
| 15 | 10344459 | -0.4335802 | -0.137125  | 0.0404724  |                            |                                                                                         |
| 15 | 10340388 | -0.4327964 | -0.0308124 | 0.097679   |                            |                                                                                         |
| 15 | 10547100 | -0.4324998 | -0.009184  | 0.137206   | PLXND1                     | plexin D1                                                                               |
| 15 | 10343685 | -0.432038  | -0.0462002 | 0.0223228  |                            |                                                                                         |
| 15 | 10343225 | -0.4308718 | -0.0753966 | 0.413791   |                            |                                                                                         |
| 15 | 10338333 | -0.4305648 | -0.1902276 | 0.1351592  |                            |                                                                                         |
| 15 | 10358547 | -0.4267698 | -0.0718046 | 0.4392614  | Hmcn1                      | hemimentin 1                                                                            |
| 15 | 10341325 | -0.4258618 | -0.0737204 | 0.1687856  |                            |                                                                                         |
| 15 | 10358490 | -0.4258408 | -0.089891  | 0.4208328  | Hmcn1                      | hemimentin 1                                                                            |
| 15 | 10352918 | -0.425259  | -0.2145568 | -0.0730966 | A330023F24Rik              | RIKEN cDNA A330023F24 gene                                                              |
| 15 | 10449551 | -0.4229138 | -0.3143672 | 0.0472532  | CPNE5                      | copine V                                                                                |
| 15 | 10580663 | -0.4225344 | -0.2592942 | 0.0045618  | Ces1f (includes EG:234564) | carboxylesterase 1F                                                                     |
| 15 | 10587778 | -0.4206114 | -0.0860468 | -0.0417602 |                            |                                                                                         |
| 15 | 10342667 | -0.4204194 | -0.0716392 | -0.0826946 |                            |                                                                                         |
| 15 | 10339240 | -0.4193576 | -0.1209868 | 0.011484   |                            |                                                                                         |
| 15 | 10591169 | -0.4175498 | -0.1241396 | 0.094997   | MUC16                      | mucin 16, cell surface associated                                                       |
| 15 | 10528227 | -0.4168436 | -0.2753578 | 0.0391534  | GNAI1                      | guanine nucleotide binding protein (G protein), alpha inhibiting activity polypeptide 1 |
| 15 | 10591135 | -0.4163462 | -0.1902936 | -0.011159  | FAT3                       | FAT tumor suppressor homolog 3 (Drosophila)                                             |
| 15 | 10338501 | -0.4162972 | -0.2035726 | 0.0611648  |                            |                                                                                         |
| 15 | 10394538 | -0.4160552 | -0.052931  | 0.0185354  | ACACA                      | acetyl-CoA carboxylase alpha                                                            |
| 15 | 10392484 | -0.4136938 | -0.2394992 | 0.1425384  | ABCA8                      | ATP-binding cassette, sub-family A (ABC1), member 8                                     |
| 15 | 10358559 | -0.4133774 | -0.0798972 | 0.3469512  | Hmcn1                      | hemimentin 1                                                                            |
| 15 | 10339244 | -0.4129868 | -0.0631664 | -0.0717936 |                            |                                                                                         |
| 15 | 10449000 | -0.4128266 | -0.046486  | -0.0525818 | MSLN                       | mesothelin                                                                              |
| 15 | 10341406 | -0.412467  | -0.167585  | 0.2807686  |                            |                                                                                         |
| 15 | 10358581 | -0.4122294 | -0.0816556 | 0.3880142  | Hmcn1                      | hemimentin 1                                                                            |
| 15 | 10513437 | -0.4119528 | -0.1471168 | -0.0803012 | Mup1 (includes others)     | major urinary protein 1                                                                 |
| 15 | 10356968 | -0.411688  | -0.137094  | -0.019762  | PAM                        | peptidylglycine alpha-amidating monooxygenase                                           |
| 15 | 10340403 | -0.4112786 | -0.2033238 | -0.0733946 |                            |                                                                                         |
| 15 | 10343682 | -0.4107152 | -0.232107  | 0.0254828  |                            |                                                                                         |
| 15 | 10513455 | -0.4100202 | -0.1375302 | -0.0643184 | Mup1 (includes others)     | major urinary protein 1                                                                 |
| 15 | 10339424 | -0.4098396 | -0.1959366 | 0.2119132  |                            |                                                                                         |
| 15 | 10366864 | -0.407544  | -0.0953952 | -0.053778  | F420014N23Rik              | RIKEN cDNA F420014N23 gene                                                              |
| 15 | 10436941 | -0.4066296 | -0.1540982 | -0.0755712 | MRPS6                      | mitochondrial ribosomal protein S6                                                      |
| 15 | 10380059 | -0.4060166 | -0.0910194 | -0.056454  |                            |                                                                                         |
| 15 | 10380061 | -0.4060166 | -0.0910194 | -0.056454  |                            |                                                                                         |
| 15 | 10380063 | -0.4060166 | -0.0910194 | -0.056454  |                            |                                                                                         |
| 15 | 10380065 | -0.4060166 | -0.0910194 | -0.056454  |                            |                                                                                         |
| 15 | 10341254 | -0.4049014 | -0.0946186 | -0.0889144 |                            |                                                                                         |
| 15 | 10588037 | -0.4045118 | -0.1163054 | 0.2173052  | RBP1                       | retinol binding protein 1, cellular                                                     |
| 15 | 10340497 | -0.4044464 | -0.0746    | -0.045976  |                            |                                                                                         |
| 15 | 10338177 | -0.4036762 | -0.178779  | 0.1440142  |                            |                                                                                         |
| 15 | 10585186 | -0.4033492 | -0.094621  | 0.000394   | 1600029D21Rik              | RIKEN cDNA 1600029D21 gene                                                              |
| 15 | 10339384 | -0.4020136 | -0.0834362 | -0.0243928 |                            |                                                                                         |
| 15 | 10570278 | -0.4001286 | -0.1790364 | 0.1352     |                            |                                                                                         |
| 15 | 10343660 | -0.3999912 | -0.2778722 | 0.1620338  |                            |                                                                                         |
| 15 | 10591630 | -0.3987732 | -0.304261  | 0.2032776  | DOCK6                      | dedicator of cytokinesis 6                                                              |
| 15 | 10349571 | -0.3985188 | -0.2721284 | 0.1127192  | FCAMR                      | Fc receptor, IgA, IgM, high affinity                                                    |
| 15 | 10504234 | -0.3973194 | -0.1931308 | 0.1768128  | UNC13B                     | unc-13 homolog B (C. elegans)                                                           |
| 15 | 10339845 | -0.3973138 | -0.1741706 | 0.2427338  |                            |                                                                                         |
| 15 | 10366293 | -0.3963488 | -0.2879794 | 0.0270198  | CSR2P2                     | cysteine and glycine-rich protein 2                                                     |
| 15 | 10338909 | -0.3899306 | -0.2696494 | -0.0217598 |                            |                                                                                         |
| 15 | 10338117 | -0.3871986 | -0.137728  | -0.0670892 |                            |                                                                                         |
| 15 | 10341661 | -0.38552   | -0.1830642 | 0.0783734  |                            |                                                                                         |
| 15 | 10515771 | -0.3840634 | -0.3048904 | 0.1212654  | TIE1                       | tyrosine kinase with immunoglobulin-like and EGF-like domains 1                         |
| 15 | 10339051 | -0.3828988 | -0.1886708 | 0.1952834  |                            |                                                                                         |
| 15 | 10493114 | -0.3823254 | -0.1777848 | 0.0885988  | NES                        | nestin                                                                                  |
| 15 | 10387368 | -0.3806668 | -0.1574054 | -0.0084686 | TMEM88                     | transmembrane protein 88                                                                |
| 15 | 10548038 | -0.3799928 | -0.2497324 | 0.1918192  | NTF3                       | neurotrophin 3                                                                          |
| 15 | 10342560 | -0.376793  | -0.2563336 | 0.07224    |                            |                                                                                         |
| 15 | 10519693 | -0.3758342 | -0.174617  | 0.1351606  | SEMA3D                     | sema domain, immunoglobulin domain (Ig), short basic domain, secreted, (semaphorin) 3D  |
| 15 | 10566172 | -0.3718938 | -0.2262286 | 0.1303532  | OR51E2                     | olfactory receptor, family 51, subfamily E, member 2                                    |
| 15 | 10361267 | -0.3712352 | -0.1984992 | 0.0204888  |                            |                                                                                         |
| 15 | 10460116 | -0.371235  | -0.2309408 | -0.095756  | SOCS6                      | suppressor of cytokine signaling 6                                                      |
| 15 | 10512145 | -0.3683578 | -0.2454408 | 0.0592752  | AQP7                       | aquaporin 7                                                                             |
| 15 | 10375058 | -0.368294  | -0.239566  | 0.041034   | HBA1/HBA2                  | hemoglobin, alpha 1                                                                     |
| 15 | 10478219 | -0.368026  | -0.2145802 | 0.1125184  | PLCG1                      | phospholipase C, gamma 1                                                                |
| 15 | 10375051 | -0.363592  | -0.218702  | 0.042956   | HBA1/HBA2                  | hemoglobin, alpha 1                                                                     |
| 15 | 10579114 | -0.3621598 | -0.2284382 | 0.0250042  | YJEFN3                     | Yjef N-terminal domain containing 3                                                     |
| 15 | 10545742 | -0.3570266 | -0.2314426 | -0.0289736 | CD207                      | CD207 molecule, langerin                                                                |
| 15 | 10338796 | -0.3564406 | -0.2639478 | 0.1178706  |                            |                                                                                         |

|    |          |            |           |           |       |                                           |
|----|----------|------------|-----------|-----------|-------|-------------------------------------------|
| 15 | 10423379 | -0.3512282 | -0.273178 | 0.1013072 | Tiaf2 | TGF-beta1-induced anti-apoptotic factor 2 |
|----|----------|------------|-----------|-----------|-------|-------------------------------------------|



**Online Table 6. Gene list of cluster 19**

| Cluster | Probe Set ID | Day 4      | Day 7     | Day 60     | Symbol          | Entrez Gene Name                                                                                      |
|---------|--------------|------------|-----------|------------|-----------------|-------------------------------------------------------------------------------------------------------|
| 19      | 10593015     | 0.4421494  | 3.1317374 | 0.2995788  | CD3G            | CD3g molecule, gamma (CD3-TCR complex)                                                                |
| 19      | 10531972     | 0.975506   | 2.7344248 | 0.159272   | Gbp8            | guanylate-binding protein 8                                                                           |
| 19      | 10581378     | 0.9756478  | 2.6932842 | 0.2039484  | PSMB10          | proteasome (prosome, macropain) subunit, beta type, 10                                                |
| 19      | 10450161     | 0.1799426  | 2.6400372 | 1.725007   | H2-Ea-ps        | major histocompatibility complex, class II, DR alpha                                                  |
| 19      | 10523717     | 0.3610268  | 2.5940596 | 1.977796   | SPP1            | secreted phosphoprotein 1                                                                             |
| 19      | 10590631     | 0.3531702  | 2.572978  | 0.3026312  | CCR2            | chemokine (C-C motif) receptor 2                                                                      |
| 19      | 10461721     | 0.6971236  | 2.5383322 | 1.0606978  | MPEG1           | macrophage expressed 1                                                                                |
| 19      | 10513739     | 0.5525402  | 2.5272676 | 0.2815386  | TNC             | tenascin C                                                                                            |
| 19      | 10456005     | 0.104702   | 2.5244304 | 1.553092   | CD74            | CD74 molecule, major histocompatibility complex, class II invariant chain                             |
| 19      | 10444291     | 0.0979178  | 2.511373  | 1.086062   | H2-Ab1          | major histocompatibility complex, class II, DQ beta 1                                                 |
| 19      | 10541564     | 0.7464494  | 2.4722832 | 0.3443094  | Clec4a3         | C-type lectin domain family 4, member a3                                                              |
| 19      | 10542164     | 0.5480114  | 2.4502562 | 1.1052172  | CLEC12A         | C-type lectin domain family 12, member A                                                              |
| 19      | 10450694     | 1.283448   | 2.4501724 | 0.5557134  | H2-T22          | histocompatibility 2, T region locus 10                                                               |
| 19      | 10574157     | 1.3049558  | 2.4474742 | 0.2223566  | Nlr5            | NLR family, CARD domain containing 5                                                                  |
| 19      | 10450154     | 0.0553464  | 2.4472182 | 1.5266352  | H2-Aa           | major histocompatibility complex, class II, DQ alpha 1                                                |
| 19      | 10450145     | 0.7637532  | 2.435735  | 0.2729004  | PSMB9           | proteasome (prosome, macropain) subunit, beta type, 9 (large multifunctional peptidase 2)             |
| 19      | 10608650     | 1.2253204  | 2.3571572 | 0.5479072  |                 |                                                                                                       |
| 19      | 10467136     | 0.9961334  | 2.3453586 | 0.0655276  | CH25H           | cholesterol 25-hydroxylase                                                                            |
| 19      | 10494271     | 0.8863408  | 2.3397738 | 0.9578114  | CTSS            | cathepsin S                                                                                           |
| 19      | 10430344     | 0.7892776  | 2.339561  | 0.3294114  | IL2RB           | interleukin 2 receptor, beta                                                                          |
| 19      | 10542214     | 0.8568258  | 2.3356938 | 0.3147028  | KLRD1           | killer cell lectin-like receptor subfamily D, member 1                                                |
| 19      | 10548409     | 0.5555734  | 2.321605  | 0.258718   | KLRC1           | killer cell lectin-like receptor subfamily C, member 1                                                |
| 19      | 10545231     | 0.112162   | 2.3115278 | 1.2174252  |                 |                                                                                                       |
| 19      | 10450682     | 1.1968086  | 2.3070544 | 0.5163656  | H2-T23          | major histocompatibility complex, class I, E                                                          |
| 19      | 10499899     | 0.3411854  | 2.2756336 | 0.430861   | Sprr1a          | small proline-rich protein 1A                                                                         |
| 19      | 10566358     | 1.4552558  | 2.2619232 | 0.3253804  | Trim30a/Trim30d | tripartite motif-containing 30A                                                                       |
| 19      | 10358408     | 0.5463968  | 2.25218   | 1.0736032  | RGS1            | regulator of G-protein signaling 1                                                                    |
| 19      | 10500335     | 1.0418258  | 2.2285576 | 0.0730666  | FCGR1A          | Fc fragment of IgG, high affinity Ia, receptor (CD64)                                                 |
| 19      | 10358224     | 0.5411394  | 2.2280782 | 0.391751   | PTPRC           | protein tyrosine phosphatase, receptor type, C                                                        |
| 19      | 10376060     | 0.6354092  | 2.2272594 | 0.273665   | IRF1            | interferon regulatory factor 1                                                                        |
| 19      | 10360370     | 1.4681804  | 2.1829292 | -0.0354692 | BC094916/Pyhin1 | pyrin and HIN domain family, member 1                                                                 |
| 19      | 10482802     | 0.1173006  | 2.1749958 | 0.1873466  | CYTI1P          | cytohesin 1 interacting protein                                                                       |
| 19      | 10483110     | 1.430762   | 2.1434404 | 0.2088794  | IFIH1           | interferon induced with helicase C domain 1                                                           |
| 19      | 10391207     | 1.5878618  | 2.1416922 | 0.1567764  | DHX58           | DEXH (Asp-Glu-X-His) box polypeptide 58                                                               |
| 19      | 10360398     | 1.7179874  | 2.1286288 | 0.1429086  | Ifi202b         | interferon activated gene 202B                                                                        |
| 19      | 10469816     | 0.534669   | 2.114779  | 0.7450546  | IL1RN           | interleukin 1 receptor antagonist                                                                     |
| 19      | 10586865     | 0.4116198  | 2.1073    | 0.4162836  | ALDH1A2         | aldehyde dehydrogenase 1 family, member A2                                                            |
| 19      | 10416437     | 0.6751552  | 2.096989  | 0.5377088  | LCP1            | lymphocyte cytosolic protein 1 (L-plastin)                                                            |
| 19      | 10522788     | 0.6406626  | 2.0893718 | 1.4313376  | STAP1           | signal transducing adaptor family member 1                                                            |
| 19      | 10608680     | 1.0686368  | 2.063397  | 0.5170938  |                 |                                                                                                       |
| 19      | 10574137     | 0.8125618  | 2.038502  | 0.1257696  | Nlr5            | NLR family, CARD domain containing 5                                                                  |
| 19      | 10541555     | 0.68506    | 2.0369386 | 0.2454676  | Clec4a1         | C-type lectin domain family 4, member a1                                                              |
| 19      | 10439268     | 1.3933982  | 2.0361166 | 0.2693444  |                 |                                                                                                       |
| 19      | 10383198     | 1.3722304  | 2.03025   | 0.2341492  |                 |                                                                                                       |
| 19      | 10489107     | 0.9496202  | 2.0174686 | 0.193735   | SAMHD1          | SAM domain and HD domain 1                                                                            |
| 19      | 10547664     | 0.652098   | 2.0117958 | -0.077252  | CLEC4E          | C-type lectin domain family 4, member E                                                               |
| 19      | 10473356     | 1.2483616  | 2.0110876 | 0.2273504  | UBE2L6          | ubiquitin-conjugating enzyme E2L 6                                                                    |
| 19      | 10545672     | 1.073653   | 2.009689  | -0.223924  | MTHFD2          | methylenetetrahydrofolate dehydrogenase (NADP+ dependent) 2, methylenetetrahydrofolate cyclohydrolase |
| 19      | 10501063     | 0.92232    | 2.0042782 | 0.5883946  | CD53            | CD53 molecule                                                                                         |
| 19      | 10548333     | 0.5087908  | 2.003942  | 0.0924392  | CD69            | CD69 molecule                                                                                         |
| 19      | 10346168     | 0.3006652  | 2.0011018 | 0.2653532  | STAT4           | signal transducer and activator of transcription 4                                                    |
| 19      | 10444229     | -0.0841386 | 1.9972962 | 0.5102066  | H2-DMa          | major histocompatibility complex, class II, DM alpha                                                  |
| 19      | 10383202     | 1.2170374  | 1.9899976 | 0.1971992  |                 |                                                                                                       |
| 19      | 10383212     | 1.2807078  | 1.9794812 | 0.1379936  |                 |                                                                                                       |
| 19      | 10427628     | 0.2020662  | 1.9776476 | 1.0536282  | IL7R            | interleukin 7 receptor                                                                                |
| 19      | 10450699     | 1.1703178  | 1.9724508 | 0.4997466  | H2-t9           | MHC class Ib T9                                                                                       |
| 19      | 10383200     | 1.2727822  | 1.9718344 | 0.1916054  |                 |                                                                                                       |
| 19      | 10582997     | 1.0521214  | 1.9663418 | 0.2881812  | CASP4           | caspase 4, apoptosis-related cysteine peptidase                                                       |
| 19      | 10363070     | 0.4972668  | 1.964941  | 0.6533532  | Gp49a/Lilrb4    | leukocyte immunoglobulin-like receptor, subfamily B, member 4                                         |
| 19      | 10566050     | 0.8505664  | 1.9609576 | 0.1040406  | IL18BP          | interleukin 18 binding protein                                                                        |
| 19      | 10387985     | 0.8071282  | 1.9576576 | 0.2166224  | C17orf87        | chromosome 17 open reading frame 87                                                                   |
| 19      | 10379530     | 0.8658914  | 1.9443636 | 0.1128612  | CCL2            | chemokine (C-C motif) ligand 2                                                                        |
| 19      | 10383204     | 1.1357078  | 1.9425306 | 0.2457926  |                 |                                                                                                       |
| 19      | 10347928     | 1.1627542  | 1.9413008 | 0.2504984  | SP110           | SP110 nuclear body protein                                                                            |
| 19      | 10582874     | 1.1627542  | 1.9413008 | 0.2504984  | SP110           | SP110 nuclear body protein                                                                            |
| 19      | 10383168     | 1.2321966  | 1.9387588 | 0.224844   |                 |                                                                                                       |

|    |          |           |           |            |                                 |                                                                                   |
|----|----------|-----------|-----------|------------|---------------------------------|-----------------------------------------------------------------------------------|
| 19 | 10439009 | 1.6160874 | 1.9293578 | 0.3396058  | APOD                            | apolipoprotein D                                                                  |
| 19 | 10466210 | 1.3308214 | 1.9272124 | -0.2145274 | Ms4a6d                          | membrane-spanning 4-domains, subfamily A, member 6D                               |
| 19 | 10383214 | 1.2460008 | 1.9243842 | 0.155819   | RNF213                          | ring finger protein 213                                                           |
| 19 | 10590623 | 0.1569208 | 1.9074108 | 0.3690986  | CXCR6                           | chemokine (C-X-C motif) receptor 6                                                |
| 19 | 10444821 | 1.18119   | 1.8987912 | 0.345559   | H2-Q8                           | histocompatibility 2, Q region locus 8                                            |
| 19 | 10516620 | 0.3329464 | 1.895378  | -0.0414716 | LCK                             | lymphocyte-specific protein tyrosine kinase                                       |
| 19 | 10576034 | 0.3441756 | 1.8938428 | 0.228497   | IRF8                            | interferon regulatory factor 8                                                    |
| 19 | 10543067 | 0.8924464 | 1.8921396 | -0.1612068 | ASNS                            | asparagine synthetase (glutamine-hydrolyzing)                                     |
| 19 | 10385504 | 1.3345508 | 1.8849688 | 0.0609972  | 993011J21Rik1 (includes others) | RIKEN cDNA 993011J21 gene 1                                                       |
| 19 | 10512067 | 1.4561762 | 1.882034  | 0.1562328  | DDX58                           | DEAD (Asp-Glu-Ala-Asp) box polypeptide 58                                         |
| 19 | 10371082 | 0.2148154 | 1.8804068 | -0.460633  | ITGB1BP3                        | integrin beta 1 binding protein 3                                                 |
| 19 | 10346799 | 0.0043482 | 1.8797438 | 0.1659624  | ICOS                            | inducible T-cell co-stimulator                                                    |
| 19 | 10375145 | 0.6974618 | 1.8792452 | 0.1815292  | LCP2                            | lymphocyte cytosolic protein 2 (SH2 domain containing leukocyte protein of 76kDa) |
| 19 | 10450675 | 1.287698  | 1.8782556 | 0.251955   | H2-T24                          | histocompatibility 2, T region locus 24                                           |
| 19 | 10451287 | 1.1796362 | 1.876985  | 0.080637   | ISG15                           | ISG15 ubiquitin-like modifier                                                     |
| 19 | 10383206 | 1.4657144 | 1.8769186 | 0.1973942  |                                 |                                                                                   |
| 19 | 10544133 | 1.217127  | 1.866139  | 0.1714104  | PARP12                          | poly (ADP-ribose) polymerase family, member 12                                    |
| 19 | 10383208 | 1.27534   | 1.8656074 | 0.0859574  |                                 |                                                                                   |
| 19 | 10587323 | 0.2530728 | 1.8571534 | 0.030345   | GSTA5                           | glutathione S-transferase alpha 5                                                 |
| 19 | 10547621 | 0.718058  | 1.854566  | 0.6046294  | APOBEC1                         | apolipoprotein B mRNA editing enzyme, catalytic polypeptide 1                     |
| 19 | 10578264 | 0.8405288 | 1.8510092 | 0.181129   | MSR1                            | macrophage scavenger receptor 1                                                   |
| 19 | 10497358 | 0.440363  | 1.8461006 | 0.105642   | SIRPB1                          | signal-regulatory protein beta 1                                                  |
| 19 | 10508392 | 0.6191052 | 1.8327338 | 0.0518754  | RNF19B                          | ring finger protein 19B                                                           |
| 19 | 10383196 | 1.239303  | 1.8305924 | 0.1384022  |                                 |                                                                                   |
| 19 | 10404606 | 0.7732084 | 1.826795  | 0.798668   | LY86                            | lymphocyte antigen 86                                                             |
| 19 | 10416837 | 0.4658074 | 1.819301  | 0.0892956  | IRG1                            | immunoresponsive 1 homolog (mouse)                                                |
| 19 | 10384458 | 0.4738072 | 1.8126064 | 0.5662866  | PLEK                            | pleckstrin                                                                        |
| 19 | 10430174 | 0.9298544 | 1.8121148 | -0.0424356 | ApoB9a/Apo9b                    | apolipoprotein L 9b                                                               |
| 19 | 10422760 | 0.3261818 | 1.8113256 | 0.3297336  | FYB                             | FYN binding protein                                                               |
| 19 | 10444780 | 0.8865558 | 1.8096416 | 0.3486722  | H2-D1                           | major histocompatibility complex, class I, C                                      |
| 19 | 10587683 | 0.224268  | 1.8088916 | 0.460044   | BCL2A1                          | BCL2-related protein A1                                                           |
| 19 | 10494978 | 0.461454  | 1.8025842 | 0.103349   | PTPN22                          | protein tyrosine phosphatase, non-receptor type 22 (lymphoid)                     |
| 19 | 10548345 | 0.6456856 | 1.790527  | 0.1088762  | KLRK1                           | killer cell lectin-like receptor subfamily K, member 1                            |
| 19 | 10383152 | 1.2251342 | 1.7822882 | 0.1650364  |                                 |                                                                                   |
| 19 | 10466127 | 0.7595704 | 1.7729404 | 0.2949266  | AW112010                        | expressed sequence AW112010                                                       |
| 19 | 10534909 | 1.0012986 | 1.7727008 | 0.274811   | SP110                           | SP110 nuclear body protein                                                        |
| 19 | 10566144 | 1.0783222 | 1.765984  | 0.0399148  | TRIM21                          | tripartite motif containing 21                                                    |
| 19 | 10547657 | 0.592161  | 1.7624398 | 0.7489586  | C3AR1                           | complement component 3a receptor 1                                                |
| 19 | 10341146 | 0.955206  | 1.757856  | 0.2708486  |                                 |                                                                                   |
| 19 | 10398907 | 0.6186054 | 1.7508612 | 0.2368952  | PLD4                            | phospholipase D family, member 4                                                  |
| 19 | 10364262 | 0.3280914 | 1.7493698 | 0.5955638  | ITGB2                           | integrin, beta 2 (complement component 3 receptor 3 and 4 subunit)                |
| 19 | 10383233 | 1.1444914 | 1.7484898 | 0.1143688  | RNF213                          | ring finger protein 213                                                           |
| 19 | 10467578 | 0.5865978 | 1.737426  | 0.2986214  | PIK3AP1                         | phosphoinositide-3-kinase adaptor protein 1                                       |
| 19 | 10538979 | 0.039099  | 1.7373972 | 0.0898172  | CD8B                            | CD8b molecule                                                                     |
| 19 | 10351658 | 0.27022   | 1.7345502 | 0.348607   | CD48                            | CD48 molecule                                                                     |
| 19 | 10583008 | 0.5963556 | 1.731618  | 0.7944984  | CASP12                          | caspace 12 (gene/pseudogene)                                                      |
| 19 | 10533213 | 0.952913  | 1.7272632 | 0.028116   | OAS3                            | 2'-5'-oligoadenylate synthetase 3, 100kDa                                         |
| 19 | 10579532 | 0.9742552 | 1.7251682 | 0.015638   | BST2                            | bone marrow stromal cell antigen 2                                                |
| 19 | 10601456 | 0.4274258 | 1.7217426 | 0.0632648  | Gm6377                          | predicted gene 6377                                                               |
| 19 | 10367224 | 1.1219454 | 1.7212156 | 0.1063028  | STAT2                           | signal transducer and activator of transcription 2, 113kDa                        |
| 19 | 10473125 | 0.2624998 | 1.7191564 | 0.2741498  | ITGA4                           | integrin, alpha 4 (antigen CD49D, alpha 4 subunit of VLA-4 receptor)              |
| 19 | 10577655 | 0.6809258 | 1.7177706 | -0.0897372 | IDO1                            | indoleamine 2,3-dioxygenase 1                                                     |
| 19 | 10587331 | 0.2273104 | 1.71706   | 0.0388082  | GSTA5                           | glutathione S-transferase alpha 5                                                 |
| 19 | 10414360 | 0.2304294 | 1.7160434 | 1.2752646  | LGALS3                          | lectin, galactoside-binding, soluble, 3                                           |
| 19 | 10420030 | 0.544547  | 1.7142812 | 0.1313866  | PSME2                           | proteasome (prosome, macropain) activator subunit 2 (PA28 beta)                   |
| 19 | 10601385 | 0.8437128 | 1.7139096 | 0.5232028  | Tlr13                           | toll-like receptor 13                                                             |
| 19 | 10404429 | 0.548754  | 1.7086388 | 0.3013378  | SERPIN9                         | serpin peptidase inhibitor, clade B (ovalbumin), member 9                         |
| 19 | 10363082 | 0.674021  | 1.7064604 | 0.6561414  | Gp49a/Lilrb4                    | leukocyte immunoglobulin-like receptor, subfamily B, member 4                     |
| 19 | 10466314 | 1.0620346 | 1.701901  | -0.047045  | Gm6545                          | predicted gene 6545                                                               |
| 19 | 10581813 | 0.770091  | 1.701732  | -0.0969206 | MLKL                            | mixed lineage kinase domain-like                                                  |
| 19 | 10532744 | 0.3363368 | 1.69874   | 0.2439462  | SELP1G                          | selectin P ligand                                                                 |
| 19 | 10372410 | 0.522368  | 1.698527  | 1.1243976  | KRR1                            | KRR1, small subunit (SSU) processome component, homolog (yeast)                   |
| 19 | 10397975 | 1.0263038 | 1.6912854 | 0.423526   | IFI27                           | interferon, alpha-inducible protein 27                                            |
| 19 | 10452980 | 1.4950454 | 1.6912818 | 0.096311   | EIF2AK2                         | eukaryotic translation initiation factor 2-alpha kinase 2                         |
| 19 | 10385511 | 0.7952632 | 1.690896  | 0.2082678  | PSME2                           | proteasome (prosome, macropain) activator subunit 2 (PA28 beta)                   |
| 19 | 10554240 | 1.2615106 | 1.690042  | 0.1112326  | ISG20                           | interferon stimulated exonuclease gene 20kDa                                      |
| 19 | 10360070 | 0.9638368 | 1.6841486 | 0.5139922  | FCER1G                          | Fc fragment of IgE, high affinity I, receptor for; gamma polypeptide              |
| 19 | 10559486 | 0.318287  | 1.683363  | 0.6118422  | LAIR1                           | leukocyte-associated immunoglobulin-like                                          |

|    |          |            |           |            |                          |                                                                                                             |
|----|----------|------------|-----------|------------|--------------------------|-------------------------------------------------------------------------------------------------------------|
| 19 | 10402347 | 1.1685306  | 1.668541  | -0.1304298 | IFI27L2                  | receptor 1<br>interferon, alpha-inducible protein 27-like 2                                                 |
| 19 | 10547976 | 0.3606576  | 1.662027  | 0.1520756  | TAPBPL                   | TAP binding protein-like                                                                                    |
| 19 | 10595633 | 0.2980066  | 1.6600914 | 0.463966   | BCL2A1                   | BCL2-related protein A1                                                                                     |
| 19 | 10477250 | 0.593416   | 1.6578754 | 0.1589558  | HCK                      | hemopoietic cell kinase                                                                                     |
| 19 | 10497372 | 0.077279   | 1.6482618 | 0.061407   | Gm5150                   | predicted gene 5150                                                                                         |
| 19 | 10360373 | 1.4103408  | 1.6441048 | 0.2734026  | Gm4955/Pydc4             | predicted gene 4955                                                                                         |
| 19 | 10341698 | 0.710026   | 1.6433962 | -0.2208912 |                          |                                                                                                             |
| 19 | 10458314 | 0.3242682  | 1.6420458 | 0.2020784  | TMEM173                  | transmembrane protein 173                                                                                   |
| 19 | 10388958 | 0.5125318  | 1.6375792 | 0.3854556  | EVI2A                    | ecotropic viral integration site 2A                                                                         |
| 19 | 10383210 | 1.1383424  | 1.6337102 | 0.0069638  |                          |                                                                                                             |
| 19 | 10603551 | 0.4223812  | 1.625549  | 1.159192   | CYBB                     | cytochrome b-245, beta polypeptide                                                                          |
| 19 | 10351197 | 0.5833314  | 1.6165604 | -0.1720524 | SELL                     | selectin L                                                                                                  |
| 19 | 10430372 | 0.2766366  | 1.612696  | 0.2249314  | RAC2                     | ras-related C3 botulinum toxin substrate 2<br>(rho family, small GTP binding protein<br>Rac2)               |
| 19 | 10466200 | 0.4040966  | 1.6093924 | 0.6076166  | MS4A7                    | membrane-spanning 4-domains, subfamily<br>A, member 7                                                       |
| 19 | 10424676 | 1.074176   | 1.60709   | 0.089556   | LY6E                     | lymphocyte antigen 6 complex, locus E                                                                       |
| 19 | 10533198 | 1.2649732  | 1.601928  | 0.2665056  | OAS2                     | 2'-5'-oligoadenylate synthetase 2, 69/71kDa                                                                 |
| 19 | 10385118 | 0.4048064  | 1.6018698 | 0.4297698  | DOCK2                    | dedicator of cytokinesis 2                                                                                  |
| 19 | 10446253 | 0.3505632  | 1.5963008 | 0.1871464  | VAV1                     | vav 1 guanine nucleotide exchange factor                                                                    |
| 19 | 10525158 | 1.2726552  | 1.5929634 | 0.0155286  | Oas1b                    | 2'-5'-oligoadenylate synthetase 1B                                                                          |
| 19 | 10574163 | 0.7109762  | 1.592793  | 0.1357792  | Nlr5                     | NLR family, CARD domain containing 5                                                                        |
| 19 | 10598004 | 0.072844   | 1.5914776 | 0.1603672  | CCR1                     | chemokine (C-C motif) receptor 1                                                                            |
| 19 | 10601416 | 0.0707     | 1.5850616 | 0.146496   | P2RY10                   | purinergic receptor P2Y, G-protein coupled,<br>10                                                           |
| 19 | 10587690 | 0.2873218  | 1.5840334 | 0.422429   | BCL2A1                   | BCL2-related protein A1                                                                                     |
| 19 | 10516966 | 0.5500444  | 1.5819754 | 0.1381296  | C1orf38                  | chromosome 1 open reading frame 38                                                                          |
| 19 | 10549647 | 0.7043544  | 1.5800114 | 0.3322452  | NCR1                     | natural cytotoxicity triggering receptor 1                                                                  |
| 19 | 10356278 | 0.8293982  | 1.579104  | 0.2295122  |                          |                                                                                                             |
| 19 | 10444830 | 0.9216016  | 1.5748188 | 0.3971792  | H2-Q7                    | major histocompatibility complex, class I, B                                                                |
| 19 | 10542140 | 0.474192   | 1.5670996 | 0.176973   | Klrb1f                   | killer cell lectin-like receptor subfamily B<br>member 1F                                                   |
| 19 | 10444298 | -0.0366592 | 1.5648672 | 0.7938668  | H2-Eb1                   | major histocompatibility complex, class II,<br>DR beta 1                                                    |
| 19 | 10544588 | -0.0606966 | 1.5635748 | 0.2281696  | Gimap3                   | GTPase, IMAP family member 3                                                                                |
| 19 | 10389134 | 0.7427074  | 1.5557914 | 0.2019718  | SLFN13                   | schlafen family member 13                                                                                   |
| 19 | 10557862 | 0.3038222  | 1.5469754 | 0.1986446  | ITGAM                    | integrin, alpha M (complement component<br>3 receptor 3 subunit)                                            |
| 19 | 10461622 | 0.7415382  | 1.5460996 | -0.1543084 | MS4A6A                   | membrane-spanning 4-domains, subfamily<br>A, member 6A                                                      |
| 19 | 10381408 | 0.8406186  | 1.5359778 | 0.076773   | IFI35                    | interferon-induced protein 35                                                                               |
| 19 | 10574151 | 0.7058892  | 1.535274  | 0.017785   | Nlr5                     | NLR family, CARD domain containing 5                                                                        |
| 19 | 10344031 | 0.601693   | 1.5296286 | 0.3844464  |                          |                                                                                                             |
| 19 | 10383194 | 1.0963808  | 1.5263516 | 0.0543994  |                          |                                                                                                             |
| 19 | 10539135 | 0.3874618  | 1.5245522 | 0.4551148  | CAPG                     | capping protein (actin filament), gelsolin-<br>like                                                         |
| 19 | 10379630 | 0.9251714  | 1.5240792 | 0.211215   | LOC100506736/SLFN12L     | schlafen family member 12-like                                                                              |
| 19 | 10343267 | 0.38988    | 1.5193044 | 0.3863932  |                          |                                                                                                             |
| 19 | 10460767 | 0.4964744  | 1.5171568 | 0.0798446  | BATF2                    | basic leucine zipper transcription factor,<br>ATF-like 2                                                    |
| 19 | 10495186 | 0.3895426  | 1.5164114 | 0.2865824  | AI504432                 | expressed sequence AI504432                                                                                 |
| 19 | 10383192 | 1.0434578  | 1.5140986 | -0.0689554 |                          |                                                                                                             |
| 19 | 10473809 | 0.6935322  | 1.5085088 | 0.3719016  | SPI1                     | spleen focus forming virus (SFFV) proviral<br>integration oncogene spi1                                     |
| 19 | 10343969 | 0.8470774  | 1.5062906 | 0.0323934  |                          |                                                                                                             |
| 19 | 10444268 | 0.5573244  | 1.5039722 | 0.2411812  | TAP2                     | transporter 2, ATP-binding cassette, sub-<br>family B (MDR/TAP)                                             |
| 19 | 10578493 | 1.1026004  | 1.502504  | 0.069727   | TLR3                     | toll-like receptor 3                                                                                        |
| 19 | 10559467 | 0.2746832  | 1.5013596 | 0.3916788  | Lilrb3 (includes others) | leukocyte immunoglobulin-like receptor,<br>subfamily B (with TM and ITIM domains),<br>member 3              |
| 19 | 10360382 | 1.113058   | 1.4970968 | -0.0960994 |                          |                                                                                                             |
| 19 | 10557591 | 0.2612154  | 1.484938  | 0.0962942  | ITGAL                    | integrin, alpha L (antigen CD11A (p180),<br>lymphocyte function-associated antigen 1;<br>alpha polypeptide) |
| 19 | 10566583 | 0.7771216  | 1.484039  | 0.1683282  | A630026L20               | predicted gene 8995                                                                                         |
| 19 | 10351691 | 0.1576404  | 1.4828854 | 0.0857722  | SLAMF6                   | SLAM family member 6                                                                                        |
| 19 | 10342250 | 0.6374548  | 1.4822284 | -0.1968016 |                          |                                                                                                             |
| 19 | 10524631 | 1.6460816  | 1.4800312 | -0.0082242 | OASL                     | 2'-5'-oligoadenylate synthetase-like                                                                        |
| 19 | 10508663 | 0.2615698  | 1.474983  | 0.4539704  | LAPTM5                   | lysosomal protein transmembrane 5                                                                           |
| 19 | 10352000 | 0.2421598  | 1.4732024 | 0.1845638  | KMO                      | kynurenine 3-monooxygenase (kynurenine<br>3-hydroxylase)                                                    |
| 19 | 10395039 | 1.9141296  | 1.4696918 | 0.1989334  | CMPK2                    | cytidine monophosphate (UMP-CMP)<br>kinase 2, mitochondrial                                                 |
| 19 | 10385513 | 0.7977336  | 1.46827   | 0.1571774  | 9930111J21Rik2           | RIKEN cDNA 9930111J21 gene 2                                                                                |
| 19 | 10425049 | 0.885278   | 1.4578154 | 0.0038998  | Apo19a/Apo19b            | apolipoprotein L 9b                                                                                         |
| 19 | 10339750 | 0.6767434  | 1.4569978 | 0.0487598  |                          |                                                                                                             |
| 19 | 10534927 | 0.573481   | 1.456305  | 0.337669   | PILRA                    | paired immunoglobulin-like type 2 receptor<br>alpha                                                         |
| 19 | 10491091 | 1.0070048  | 1.4562698 | 0.4677006  | TNFSF10                  | tumor necrosis factor (ligand) superfamily,<br>member 10                                                    |
| 19 | 10343290 | 0.6155766  | 1.4531214 | -0.0887452 |                          |                                                                                                             |
| 19 | 10531737 | 0.2531144  | 1.4524198 | 0.4214542  | HPSE                     | heparanase                                                                                                  |
| 19 | 10392839 | 0.4517374  | 1.4475472 | 0.1387038  | CD300E                   | CD300e molecule                                                                                             |
| 19 | 10606016 | 0.43968    | 1.4448968 | 0.0556836  | IL2RG                    | interleukin 2 receptor, gamma                                                                               |
| 19 | 10341587 | 0.653113   | 1.4434846 | 0.3446022  |                          |                                                                                                             |

|    |          |            |           |            |                            |                                                                                          |
|----|----------|------------|-----------|------------|----------------------------|------------------------------------------------------------------------------------------|
| 19 | 10588479 | 0.448144   | 1.4411098 | 0.1625784  | TLR9                       | toll-like receptor 9                                                                     |
| 19 | 10459772 | 0.3656014  | 1.4394276 | -0.0398924 | LIPG                       | lipase, endothelial                                                                      |
| 19 | 10427336 | 0.1455786  | 1.4353166 | 0.5366498  | NCKAP1L                    | NCK-associated protein 1-like                                                            |
| 19 | 10429128 | 0.2684102  | 1.4342246 | 0.154483   | SLA                        | Src-like-adaptor                                                                         |
| 19 | 10385526 | 0.7593058  | 1.4337874 | 0.170925   | 9930111J21Rik2             | RIKEN cDNA 9930111J21 gene 2                                                             |
| 19 | 10444236 | 0.0472272  | 1.4301082 | 0.3940302  | H2-DMb2                    | major histocompatibility complex, class II, DM beta                                      |
| 19 | 10404061 | 0.240023   | 1.4277124 | 0.060515   | HIST1H2BM                  | histone cluster 1, H2bm                                                                  |
| 19 | 10593024 | -0.0129024 | 1.4223468 | 0.0332308  | CD3E                       | CD3e molecule, epsilon (CD3-TCR complex)                                                 |
| 19 | 10435457 | 0.8965184  | 1.4128956 | 0.2355468  | PARP9                      | poly (ADP-ribose) polymerase family, member 9                                            |
| 19 | 10347925 | 1.0641064  | 1.4110846 | 0.5541396  | Csprs (includes others)    | component of Sp100-rs                                                                    |
| 19 | 10343468 | 0.7004286  | 1.4107288 | 0.132326   |                            |                                                                                          |
| 19 | 10487208 | 0.5014866  | 1.4104722 | 0.3125408  | ATP8B4                     | ATPase, class I, type 8B, member 4                                                       |
| 19 | 10446282 | 0.4914846  | 1.4084476 | 0.4135968  | EMR1                       | egf-like module containing, mucin-like, hormone receptor-like 1                          |
| 19 | 10347915 | 1.1219024  | 1.4075254 | 0.5349144  | Csprs (includes others)    | component of Sp100-rs                                                                    |
| 19 | 10588786 | 0.6018798  | 1.4061173 | 0.1428684  | UBA7                       | ubiquitin-like modifier activating enzyme 7                                              |
| 19 | 10432640 | 0.333436   | 1.4047486 | -0.000527  | BIN2                       | bridging integrator 2                                                                    |
| 19 | 10461614 | 0.961888   | 1.4014132 | -0.2155936 | Ms4a6c                     | membrane-spanning 4-domains, subfamily A, member 6C                                      |
| 19 | 10338492 | 0.5095478  | 1.3989682 | 0.0855698  |                            |                                                                                          |
| 19 | 10466190 | 0.1068396  | 1.3979732 | 0.3058532  | MS4A14                     | membrane-spanning 4-domains, subfamily A, member 14                                      |
| 19 | 10533256 | 0.9298928  | 1.3964458 | -0.0836834 | OAS1                       | 2',5'-oligoadenylate synthetase 1, 40/46kDa                                              |
| 19 | 10574133 | 0.522839   | 1.3949696 | 0.2162864  | Nlr5                       | NLR family, CARD domain containing 5                                                     |
| 19 | 10425092 | 0.0750874  | 1.390971  | 0.4081618  | CYTH4                      | cytohesin 4                                                                              |
| 19 | 10397645 | 0.4072416  | 1.3895768 | 0.2572878  | GRP65                      | G protein-coupled receptor 65                                                            |
| 19 | 10416566 | 0.6688464  | 1.3865894 | 0.06489    | EPSTI1                     | epithelial stromal interaction 1 (breast)                                                |
| 19 | 10415319 | 1.1973094  | 1.384173  | 0.2033798  | IRF9                       | interferon regulatory factor 9                                                           |
| 19 | 10340317 | 0.5451872  | 1.382322  | 0.0440246  |                            |                                                                                          |
| 19 | 10363475 | 0.4745612  | 1.3818068 | -0.1199382 | PRF1                       | perforin 1 (pore forming protein)                                                        |
| 19 | 10541587 | 0.3294138  | 1.3817326 | 0.2952782  | CLEC4A                     | C-type lectin domain family 4, member A                                                  |
| 19 | 10486061 | 0.2594004  | 1.3733332 | 0.0726536  | RASGRP1                    | RAS guanyl releasing protein 1 (calcium and DAG-regulated)                               |
| 19 | 10494405 | -0.020348  | 1.3711182 | 0.2621112  |                            |                                                                                          |
| 19 | 10342553 | 0.5957916  | 1.3669464 | -0.1149076 |                            |                                                                                          |
| 19 | 10566578 | 1.037822   | 1.3646458 | 0.2069368  | GVIN1                      | GTPase, very large interferon inducible pseudogene 1                                     |
| 19 | 10339951 | 0.3897564  | 1.3509698 | 0.0952652  |                            |                                                                                          |
| 19 | 10408239 | -0.014304  | 1.348348  | 0.256996   | HIST1H3A (includes others) | histone cluster 1, H3a                                                                   |
| 19 | 10404065 | -0.020466  | 1.346584  | 0.26231    |                            |                                                                                          |
| 19 | 10341222 | 0.4446238  | 1.3458018 | 0.1773594  |                            |                                                                                          |
| 19 | 10404049 | -0.031654  | 1.344784  | 0.255568   | HIST3H3                    | histone cluster 3, H3                                                                    |
| 19 | 10559446 | 0.1278364  | 1.3425096 | 0.1234242  | Lilrb3 (includes others)   | leukocyte immunoglobulin-like receptor, subfamily B (with TM and ITIM domains), member 3 |
| 19 | 10404028 | -0.021226  | 1.341852  | 0.261474   |                            |                                                                                          |
| 19 | 10568024 | 0.085763   | 1.3407108 | 0.0754376  | CORO1A                     | coronin, actin binding protein, 1A                                                       |
| 19 | 10412218 | 0.246929   | 1.3405814 | 0.0922118  | GZMK                       | granzyme K (granzyme 3; tryptase II)                                                     |
| 19 | 10338116 | 0.5032076  | 1.3396406 | 0.1213958  |                            |                                                                                          |
| 19 | 10341395 | 0.6270404  | 1.3378844 | 0.1173654  |                            |                                                                                          |
| 19 | 10353844 | 0.2429408  | 1.333679  | 0.2992638  | LINCR                      | neutralized homolog 3 (Drosophila) pseudogene                                            |
| 19 | 10566571 | 0.9780742  | 1.3315022 | 0.205392   | GVIN1                      | GTPase, very large interferon inducible pseudogene 1                                     |
| 19 | 10551883 | 0.4396744  | 1.330637  | 0.6743776  | TYROBP                     | TYRO protein tyrosine kinase binding protein                                             |
| 19 | 10374333 | 0.3390056  | 1.3290564 | 0.0976656  | IKZF1                      | IKAROS family zinc finger 1 (Ikaros)                                                     |
| 19 | 10574159 | 0.7214016  | 1.3265116 | 0.145912   | Nlr5                       | NLR family, CARD domain containing 5                                                     |
| 19 | 10408246 | -0.015718  | 1.325692  | 0.245507   |                            |                                                                                          |
| 19 | 10498345 | 0.0917886  | 1.324675  | 0.0081468  | GPR171                     | G protein-coupled receptor 171                                                           |
| 19 | 10403941 | -0.04412   | 1.320704  | 0.255596   |                            |                                                                                          |
| 19 | 10439527 | 0.3021902  | 1.315349  | 0.1007632  | TIGIT                      | T cell immunoreceptor with Ig and ITIM domains                                           |
| 19 | 10408083 | -0.007942  | 1.31222   | 0.253824   |                            |                                                                                          |
| 19 | 10359181 | 1.178489   | 1.3080828 | 0.3061894  | TOR3A                      | torsin family 3, member A                                                                |
| 19 | 10541683 | 0.5615392  | 1.3078052 | 0.619202   | C1R                        | complement component 1, r subcomponent                                                   |
| 19 | 10465059 | 0.351004   | 1.3016886 | 0.0989552  | CTSW                       | cathepsin W                                                                              |
| 19 | 10494402 | 0.018493   | 1.2996292 | 0.2561438  |                            |                                                                                          |
| 19 | 10443980 | 0.0734448  | 1.2986444 | 0.3442004  | MYO1F                      | myosin IF                                                                                |
| 19 | 10461636 | 0.9397984  | 1.296475  | -0.2190182 |                            |                                                                                          |
| 19 | 10439312 | 0.421205   | 1.2959762 | 0.2275316  | CD86                       | CD86 molecule                                                                            |
| 19 | 10476945 | 0.1432678  | 1.2932402 | -0.0150944 | CST7                       | cystatin F (leukocystatin)                                                               |
| 19 | 10429843 | 0.6822778  | 1.2925336 | 0.185145   | PARP10                     | poly (ADP-ribose) polymerase family, member 10                                           |
| 19 | 10341905 | 0.3699916  | 1.2906664 | 0.1438182  |                            |                                                                                          |
| 19 | 10424400 | 0.3867162  | 1.2881278 | 0.0683688  | MYC                        | v-myc myelocytomatosis viral oncogene homolog (avian)                                    |
| 19 | 10444068 | 0.387153   | 1.2855764 | 0.1565016  | TAPBP                      | TAP binding protein (tapasin)                                                            |
| 19 | 10351679 | 0.1049966  | 1.283378  | 0.7502694  | CD84                       | CD84 molecule                                                                            |
| 19 | 10530145 | 0.2903852  | 1.2805916 | 0.1836964  | TLR1                       | toll-like receptor 1                                                                     |
| 19 | 10593050 | 0.3111306  | 1.2747598 | 0.233196   | IL10RA                     | interleukin 10 receptor, alpha                                                           |
| 19 | 10482517 | 0.4592992  | 1.2700728 | 0.19648    | NMI                        | N-myc (and STAT) interactor                                                              |
| 19 | 10340164 | 0.970162   | 1.268731  | 0.136533   |                            |                                                                                          |
| 19 | 10441003 | 0.1841896  | 1.2679018 | 0.386084   | Runx1                      | runt related transcription factor 1                                                      |
| 19 | 10344300 | 0.4637748  | 1.2664564 | 0.3330754  |                            |                                                                                          |

|    |          |           |           |            |                             |                                                                                   |
|----|----------|-----------|-----------|------------|-----------------------------|-----------------------------------------------------------------------------------|
| 19 | 10356262 | 0.7599434 | 1.2638648 | 0.3805486  | Csprs (includes others)     | component of Sp100-rs                                                             |
| 19 | 10338280 | 0.767899  | 1.260463  | 0.1806542  |                             |                                                                                   |
| 19 | 10581434 | 0.4151294 | 1.2577828 | 0.6114122  | DPEP2                       | dipeptidase 2                                                                     |
| 19 | 10450484 | 0.2926204 | 1.2544966 | 0.3261892  | AIFI                        | allograft inflammatory factor 1                                                   |
| 19 | 10583669 | 0.2381194 | 1.253789  | 0.1980792  | C19orf38                    | chromosome 19 open reading frame 38                                               |
| 19 | 10521667 | 0.327503  | 1.252063  | 0.2547964  | BST1                        | bone marrow stromal cell antigen 1                                                |
| 19 | 10452316 | 0.200302  | 1.251358  | 0.455166   | C3                          | complement component 3                                                            |
| 19 | 10580754 | 0.540463  | 1.2510904 | 0.0598304  | 9330175E14Rik               | RIKEN cDNA 9330175E14 gene                                                        |
| 19 | 10542040 | 0.5443804 | 1.2499434 | 0.1510554  | PARP11                      | poly (ADP-ribose) polymerase family, member 11                                    |
| 19 | 10420497 | 0.8798182 | 1.249821  | -0.348363  | PHF11                       | PHD finger protein 11                                                             |
| 19 | 10566346 | 0.8833828 | 1.2497776 | 0.2051118  | TRIM5                       | tripartite motif containing 5                                                     |
| 19 | 10347948 | 0.7803866 | 1.2487958 | 0.2957984  | Sp100                       | nuclear antigen Sp100                                                             |
| 19 | 10339327 | 0.8099732 | 1.2386216 | 0.2516898  |                             |                                                                                   |
| 19 | 10429560 | 0.4708498 | 1.238127  | -0.1571372 | Ly6a (includes others)      | lymphocyte antigen 6 complex, locus A                                             |
| 19 | 10461765 | 0.5092338 | 1.2373714 | 0.1299998  | LPXN                        | leupaxin                                                                          |
| 19 | 10366586 | 0.2604464 | 1.2370944 | -0.032477  | IFNG                        | interferon, gamma                                                                 |
| 19 | 10589884 | 0.674914  | 1.2364032 | 0.2063814  | Bcl2a1c                     | B-cell leukemia/lymphoma 2 related protein A1c                                    |
| 19 | 10520452 | 0.3085278 | 1.2344378 | -0.016623  | IL6                         | interleukin 6 (interferon, beta 2)                                                |
| 19 | 10574143 | 0.396912  | 1.2337408 | 0.091473   | Nlr5                        | NLR family, CARD domain containing 5                                              |
| 19 | 10542911 | 0.8911856 | 1.226798  | 0.221653   | SAMD9L                      | sterile alpha motif domain containing 9-like                                      |
| 19 | 10359851 | 0.548288  | 1.223848  | -0.483796  | UCK2                        | uridine-cytidine kinase 2                                                         |
| 19 | 10403871 | 0.3765194 | 1.21935   | 0.3465268  | AOAH                        | acyloxyacyl hydrolase (neutrophil)                                                |
| 19 | 10381445 | 0.4599564 | 1.2148456 | 0.2474696  | TMEM106A                    | transmembrane protein 106A                                                        |
| 19 | 10548535 | 0.4885794 | 1.2130834 | -0.0444708 | Klr4 (includes others)      | killer cell lectin-like receptor, subfamily A, member 4                           |
| 19 | 10338178 | 1.01608   | 1.2127464 | 0.1513468  |                             |                                                                                   |
| 19 | 10339765 | 0.7645518 | 1.2113492 | 0.094755   |                             |                                                                                   |
| 19 | 10450344 | 0.2722964 | 1.2109044 | 0.0437848  | C2                          | complement component 2                                                            |
| 19 | 10388902 | 1.0430218 | 1.206333  | 0.0834354  | LGALS9B                     | lectin, galactoside-binding, soluble, 9B                                          |
| 19 | 10440393 | 0.2722946 | 1.1941854 | 0.0443434  | SAMSN1                      | SAM domain, SH3 domain and nuclear localization signals 1                         |
| 19 | 10487823 | 0.6965748 | 1.1939224 | 0.1820418  | SIGLEC1                     | sialic acid binding Ig-like lectin 1, sialoadhesin                                |
| 19 | 10461558 | 0.3451984 | 1.1929978 | 0.2245666  | SLC15A3                     | solute carrier family 15, member 3                                                |
| 19 | 10582985 | 0.4341582 | 1.1912892 | 0.3020038  | CASP1                       | caspase 1, apoptosis-related cysteine peptidase (interleukin 1, beta, convertase) |
| 19 | 10402585 | 0.5813128 | 1.1908234 | 0.0745218  | WARS                        | tryptophanyl-tRNA synthetase                                                      |
| 19 | 10387536 | 0.097804  | 1.1906194 | 0.6908104  | CD68                        | CD68 molecule                                                                     |
| 19 | 10343192 | 0.7152414 | 1.1902338 | 0.2045428  |                             |                                                                                   |
| 19 | 10342761 | 0.7804614 | 1.1895216 | 0.0579658  |                             |                                                                                   |
| 19 | 10342539 | 1.0484072 | 1.1816892 | -0.1711614 |                             |                                                                                   |
| 19 | 10435920 | 0.352199  | 1.1808902 | 0.2778492  |                             |                                                                                   |
| 19 | 10338367 | 0.519272  | 1.1806316 | -0.0498678 |                             |                                                                                   |
| 19 | 10406205 | 0.3361118 | 1.1708208 | 0.0557072  | ERAP1                       | endoplasmic reticulum aminopeptidase 1                                            |
| 19 | 10466130 | 0.4850486 | 1.1697002 | 0.007417   | MS4A8B                      | membrane-spanning 4-domains, subfamily A, member 8B                               |
| 19 | 10339254 | 0.5823024 | 1.1682196 | 0.4186956  |                             |                                                                                   |
| 19 | 10375443 | 0.359144  | 1.1672862 | 0.1080574  | MED7                        | mediator complex subunit 7                                                        |
| 19 | 10545135 | 0.391756  | 1.1655688 | 0.0244014  | IL12RB2                     | interleukin 12 receptor, beta 2                                                   |
| 19 | 10398052 | 0.4181428 | 1.1646914 | 0.122733   | Serpina3g (includes others) | serine (or cysteine) peptidase inhibitor, clade A, member 3G                      |
| 19 | 10582879 | 0.8689342 | 1.1643276 | 0.5951274  | Csprs (includes others)     | component of Sp100-rs                                                             |
| 19 | 10501608 | 0.3361964 | 1.1628268 | 0.2990952  | VCAM1                       | vascular cell adhesion molecule 1                                                 |
| 19 | 10339726 | 0.7792976 | 1.145073  | -0.0004674 |                             |                                                                                   |
| 19 | 10342216 | 0.5117702 | 1.144153  | 0.2796604  |                             |                                                                                   |
| 19 | 10343134 | 0.5623222 | 1.143999  | -0.0098542 |                             |                                                                                   |
| 19 | 10340782 | 0.549048  | 1.1399344 | 0.4230836  |                             |                                                                                   |
| 19 | 10445119 | 0.518179  | 1.1362588 | 0.2081838  | H2-M3                       | major histocompatibility complex, class I, G                                      |
| 19 | 10340809 | 0.564832  | 1.136208  | 0.103614   |                             |                                                                                   |
| 19 | 10339017 | 0.4761248 | 1.1312168 | 0.0982066  |                             |                                                                                   |
| 19 | 10450069 | 0.7635142 | 1.1293436 | 0.2062068  | H2-K2                       | major histocompatibility complex, class I, B                                      |
| 19 | 10421697 | 0.4191708 | 1.115433  | 0.2113622  | Lacc1                       | laccase (multicopper oxidoreductase) domain containing 1                          |
| 19 | 10461629 | 0.6942788 | 1.1130892 | 0.331865   | Ms4a4c (includes others)    | membrane-spanning 4-domains, subfamily A, member 4C                               |
| 19 | 10340391 | 0.6651832 | 1.1085034 | 0.4850126  |                             |                                                                                   |
| 19 | 10450242 | 0.4702188 | 1.1008612 | 0.2129744  | C4B (includes others)       | complement component 4B (Chido blood group)                                       |
| 19 | 10356274 | 0.7974278 | 1.0985676 | 0.5549746  | Csprs (includes others)     | component of Sp100-rs                                                             |
| 19 | 10429564 | 0.90183   | 1.09786   | -0.052366  | Ly6a (includes others)      | lymphocyte antigen 6 complex, locus A                                             |
| 19 | 10566574 | 0.7283606 | 1.0948416 | 0.1557008  | GVIN1                       | GTPase, very large interferon inducible pseudogene 1                              |
| 19 | 10343442 | 0.4726248 | 1.09018   | 0.1831102  |                             |                                                                                   |
| 19 | 10366881 | 0.6531048 | 1.0875162 | 0.0846756  | DDIT3                       | DNA-damage-inducible transcript 3                                                 |
| 19 | 10450723 | 0.4209714 | 1.0864318 | 0.308931   | H2-T10/H2-T22               | histocompatibility 2, T region locus 10                                           |
| 19 | 10360406 | 0.841702  | 1.081448  | -0.205472  | Ifi204 (includes others)    | interferon activated gene 204                                                     |
| 19 | 10534935 | 0.495244  | 1.0788632 | 0.4150748  | PILRB                       | paired immunoglobulin-like type 2 receptor beta                                   |
| 19 | 10567580 | 0.4745284 | 1.0553076 | 0.5345208  | IGSF6                       | immunoglobulin superfamily, member 6                                              |
| 19 | 10338660 | 0.7315254 | 1.03689   | 0.4647834  |                             |                                                                                   |
| 19 | 10340154 | 0.5433788 | 1.0345178 | 0.151647   |                             |                                                                                   |
| 19 | 10382106 | 0.6473176 | 1.0337026 | 0.280278   | Gm885                       | predicted gene 885                                                                |
| 19 | 10341908 | 0.74903   | 1.0101088 | -0.0618252 |                             |                                                                                   |
| 19 | 10569017 | 0.841266  | 1.008492  | 0.097096   | IFITM3                      | interferon induced transmembrane protein 3 (1-8U)                                 |
| 19 | 10343761 | 0.5782492 | 0.9717006 | 0.5957856  |                             |                                                                                   |

|    |          |           |           |          |     |                      |
|----|----------|-----------|-----------|----------|-----|----------------------|
| 19 | 10475414 | 0.882482  | 0.970194  | 0.252234 | B2M | beta-2-microglobulin |
| 19 | 10339990 | 0.7696598 | 0.9679708 | 0.043207 |     |                      |

**Online Table 7. Gene list of cluster 20**

| x  | Probe Set ID | Day 4      | Day 7      | Day 60     | Symbol             | Entrez Gene Name                                                      |
|----|--------------|------------|------------|------------|--------------------|-----------------------------------------------------------------------|
| 20 | 10504838     | 0.6466026  | -0.6764438 | -2.052271  | NR4A3              | nuclear receptor subfamily 4, group A, member 3                       |
| 20 | 10342166     | 0.9021222  | -0.8550704 | -1.6644466 |                    |                                                                       |
| 20 | 10343939     | 0.314155   | 0.1882482  | -1.4222714 |                    |                                                                       |
| 20 | 10338097     | 0.5650608  | 0.5527936  | -1.2691318 |                    |                                                                       |
| 20 | 10359867     | 0.606477   | -0.8260516 | -1.116918  | LRRC52             | leucine rich repeat containing 52                                     |
| 20 | 10344291     | 0.4266474  | 0.0811516  | -0.9558072 |                    |                                                                       |
| 20 | 10457487     | 0.8814756  | -0.1995982 | -0.9044162 | mir-1              | microRNA 1-1                                                          |
| 20 | 10529977     | 0.580624   | -0.635134  | -0.86866   | PPARGC1A           | peroxisome proliferator-activated receptor gamma, coactivator 1 alpha |
| 20 | 10339095     | 0.32861    | -0.3504168 | -0.8404696 |                    |                                                                       |
| 20 | 10343420     | 0.1987402  | -0.1892846 | -0.7776266 |                    |                                                                       |
| 20 | 10443463     | 0.6108856  | 0.3413     | -0.7749558 | CDKN1A             | cyclin-dependent kinase inhibitor 1A (p21, Cip1)                      |
| 20 | 10529979     | 0.549544   | -0.499744  | -0.771078  | PPARGC1A           | peroxisome proliferator-activated receptor gamma, coactivator 1 alpha |
| 20 | 10448307     | 0.3367444  | 0.531072   | -0.7708702 | TNFRSF12A          | tumor necrosis factor receptor superfamily, member 12A                |
| 20 | 10341968     | 0.358779   | -0.0575052 | -0.7682682 |                    |                                                                       |
| 20 | 10342975     | 0.1286276  | -0.0392738 | -0.7137612 |                    |                                                                       |
| 20 | 10400304     | 0.437786   | -0.01601   | -0.66923   | EGLN3              | egl nine homolog 3 (C. elegans)                                       |
| 20 | 10583100     | 0.3015062  | 0.2588274  | -0.6682986 | MMP8               | matrix metalloproteinase 8 (neutrophil collagenase)                   |
| 20 | 10343228     | 0.1612522  | -0.2218376 | -0.6650314 |                    |                                                                       |
| 20 | 10343840     | 0.1762094  | -0.0432734 | -0.658523  |                    |                                                                       |
| 20 | 10339900     | 0.7079828  | 0.5340342  | -0.6476118 |                    |                                                                       |
| 20 | 10582916     | 0.2449188  | 0.0514598  | -0.6399298 |                    |                                                                       |
| 20 | 10343366     | 0.6619412  | -0.4192234 | -0.6398    |                    |                                                                       |
| 20 | 10339167     | 0.4555178  | -0.3477428 | -0.6389084 |                    |                                                                       |
| 20 | 10342609     | 0.552077   | -0.1596658 | -0.5920258 |                    |                                                                       |
| 20 | 10342933     | 0.6354876  | -0.229319  | -0.5832938 |                    |                                                                       |
| 20 | 10343582     | 0.2264012  | 0.1701006  | -0.577129  |                    |                                                                       |
| 20 | 10343410     | 0.372617   | -0.38625   | -0.5760238 |                    |                                                                       |
| 20 | 10344571     | 0.4679986  | -0.4765338 | -0.5749398 |                    |                                                                       |
| 20 | 10338949     | 0.2009184  | 0.1414942  | -0.5677778 |                    |                                                                       |
| 20 | 10340626     | 0.1738014  | -0.0001566 | -0.567402  |                    |                                                                       |
| 20 | 10574023     | 0.471064   | 0.425368   | -0.554394  | MT2A               | metallothionein 2A                                                    |
| 20 | 10343628     | 0.4820224  | -0.52959   | -0.5527058 |                    |                                                                       |
| 20 | 10340357     | 0.4543644  | -0.309628  | -0.5450722 |                    |                                                                       |
| 20 | 10344013     | 0.3851834  | -0.1298612 | -0.5315274 |                    |                                                                       |
| 20 | 10338731     | 0.6644404  | -0.4519762 | -0.531523  |                    |                                                                       |
| 20 | 10419966     | 0.1586162  | -0.1106324 | -0.5313798 | LOC100505868/ZFXH2 | zinc finger homeobox 2                                                |
| 20 | 10436100     | 0.1852876  | 0.136416   | -0.5308612 | RETNLB             | resistin like beta                                                    |
| 20 | 10340126     | 0.5333784  | -0.599984  | -0.5293894 |                    |                                                                       |
| 20 | 10343871     | 0.2381114  | 0.03443    | -0.5227972 |                    |                                                                       |
| 20 | 10344419     | 0.1697334  | -0.0888344 | -0.5221626 |                    |                                                                       |
| 20 | 10342575     | 0.259648   | -0.1477532 | -0.5218994 |                    |                                                                       |
| 20 | 10342758     | 0.2108672  | 0.2106526  | -0.5181104 |                    |                                                                       |
| 20 | 10543017     | 0.5463     | -0.434924  | -0.517146  | PDK4               | pyruvate dehydrogenase kinase, isozyme 4                              |
| 20 | 10338277     | 0.4394526  | -0.3904224 | -0.5108288 |                    |                                                                       |
| 20 | 10414514     | 0.2738508  | 0.410077   | -0.510096  | PNP                | purine nucleoside phosphorylase                                       |
| 20 | 10425283     | 0.263011   | -0.1440026 | -0.4981352 | MAFF               | v-maf musculoaponeurotic fibrosarcoma oncogene homolog F (avian)      |
| 20 | 10338384     | 1.562577   | -0.6781792 | -0.4977346 |                    |                                                                       |
| 20 | 10343057     | 0.5579906  | 0.063359   | -0.4958374 |                    |                                                                       |
| 20 | 10339351     | 0.2974774  | -0.107412  | -0.491899  |                    |                                                                       |
| 20 | 10341532     | 0.4281916  | -0.2276126 | -0.4895334 |                    |                                                                       |
| 20 | 10340505     | 0.4760996  | 0.4413078  | -0.4864232 |                    |                                                                       |
| 20 | 10338864     | 0.3702562  | -0.2694676 | -0.4850074 |                    |                                                                       |
| 20 | 10338464     | 0.3137844  | -0.049937  | -0.472538  |                    |                                                                       |
| 20 | 10343925     | 0.9744814  | -0.2944796 | -0.471071  |                    |                                                                       |
| 20 | 10344121     | 1.0337716  | 0.030855   | -0.4673632 |                    |                                                                       |
| 20 | 10338189     | 0.2269412  | 0.1143066  | -0.4661642 |                    |                                                                       |
| 20 | 10339712     | 0.4709908  | -0.1682244 | -0.4658618 |                    |                                                                       |
| 20 | 10587639     | 0.187552   | -0.099332  | -0.46563   | NT5E               | 5'-nucleotidase, ecto (CD73)                                          |
| 20 | 10341044     | 0.9763624  | 0.2941172  | -0.4642174 |                    |                                                                       |
| 20 | 10339398     | 0.2193054  | 0.0181552  | -0.4628092 |                    |                                                                       |
| 20 | 10341118     | 0.3467926  | 0.041155   | -0.4624514 |                    |                                                                       |
| 20 | 10341975     | 0.23731    | -0.0824482 | -0.4623538 |                    |                                                                       |
| 20 | 10338693     | 0.5927138  | -0.0987502 | -0.4585404 |                    |                                                                       |
| 20 | 10341107     | 0.2274096  | -0.1342748 | -0.4556472 |                    |                                                                       |
| 20 | 10340452     | 0.2701234  | -0.1106524 | -0.4523214 |                    |                                                                       |
| 20 | 10375173     | 0.5234528  | -0.1691866 | -0.4500748 |                    |                                                                       |
| 20 | 10341219     | 0.3028466  | -0.3348456 | -0.4416082 |                    |                                                                       |
| 20 | 10339580     | 0.6129774  | -0.2412416 | -0.4385158 |                    |                                                                       |
| 20 | 10341764     | 0.1703188  | -0.1097836 | -0.4381568 |                    |                                                                       |
| 20 | 10340267     | 0.4720832  | -0.076333  | -0.4381288 |                    |                                                                       |
| 20 | 10339555     | 0.5828206  | -0.0510268 | -0.4361538 |                    |                                                                       |
| 20 | 10338102     | 0.3505742  | 0.1970672  | -0.4345094 |                    |                                                                       |
| 20 | 10338348     | 0.334739   | 0.2341354  | -0.4342006 |                    |                                                                       |
| 20 | 10338252     | 0.48856104 | 0.1670512  | -0.4326426 |                    |                                                                       |
| 20 | 10342797     | 0.8363162  | 0.4265398  | -0.4316902 |                    |                                                                       |
| 20 | 10362418     | 0.3127912  | -0.3111002 | -0.4290378 | TRDN               | triadin                                                               |
| 20 | 10343831     | 0.2374426  | -0.0641066 | -0.4287364 |                    |                                                                       |
| 20 | 10338199     | 0.4758932  | -0.1411322 | -0.4264754 |                    |                                                                       |
| 20 | 10338799     | 0.383455   | -0.1096402 | -0.4253344 |                    |                                                                       |
| 20 | 10342925     | 0.5813664  | -0.0592264 | -0.4242466 |                    |                                                                       |

|    |          |           |            |            |                            |                                                              |
|----|----------|-----------|------------|------------|----------------------------|--------------------------------------------------------------|
| 20 | 10341067 | 0.2976188 | -0.1810948 | -0.4210958 |                            |                                                              |
| 20 | 10339142 | 0.2285536 | -0.2278086 | -0.4210024 |                            |                                                              |
| 20 | 10343167 | 0.4315168 | 0.0456108  | -0.4162398 |                            |                                                              |
| 20 | 10340649 | 0.6075474 | 0.0939018  | -0.4159858 |                            |                                                              |
| 20 | 10458340 | 0.394086  | -0.120517  | -0.4154666 | HBEGF                      | heparin-binding EGF-like growth factor                       |
| 20 | 10478283 | 0.4991718 | 0.0184522  | -0.4128608 | MPHOSPH6                   | M-phase phosphoprotein 6                                     |
| 20 | 10339994 | 0.5266396 | -0.4158492 | -0.412145  |                            |                                                              |
| 20 | 10339780 | 0.3365926 | 0.2569392  | -0.4098466 |                            |                                                              |
| 20 | 10338989 | 0.6465246 | -0.6638872 | -0.4060278 |                            |                                                              |
| 20 | 10362428 | 0.53231   | -0.365892  | -0.403662  | TRDN                       | triadin                                                      |
| 20 | 10339958 | 0.2094872 | -0.226427  | -0.4002024 |                            |                                                              |
| 20 | 10342477 | 0.5679884 | -0.0265002 | -0.3959038 |                            |                                                              |
| 20 | 10343406 | 0.5448574 | -0.1319472 | -0.3946708 |                            |                                                              |
| 20 | 10490946 | 0.230758  | 0.176938   | -0.3917798 | HSP90AA1                   | heat shock protein 90kDa alpha (cytosolic), class A member 1 |
| 20 | 10344444 | 0.4563744 | -0.3777998 | -0.3909098 |                            |                                                              |
| 20 | 10598018 | 0.6095922 | -0.0297206 | -0.3900832 |                            |                                                              |
| 20 | 10342072 | 0.2141818 | -0.1634178 | -0.388622  |                            |                                                              |
| 20 | 10517587 | 0.2706716 | -0.114425  | -0.3876294 | ALPL                       | alkaline phosphatase, liver/bone/kidney                      |
| 20 | 10362416 | 0.6518874 | -0.3528262 | -0.3800158 | TRDN                       | triadin                                                      |
| 20 | 10386455 | 0.3108338 | 0.1159476  | -0.3794284 | RASD1                      | RAS, dexamethasone-induced 1                                 |
| 20 | 10340629 | 0.430837  | -0.1919464 | -0.3780716 |                            |                                                              |
| 20 | 10341672 | 0.4958586 | -0.149113  | -0.3780256 |                            |                                                              |
| 20 | 10341906 | 0.3848366 | 0.0241032  | -0.3748144 |                            |                                                              |
| 20 | 10351491 | 0.2311638 | -0.0747234 | -0.3744514 | OLFML2B                    | olfactomedin-like 2B                                         |
| 20 | 10341943 | 0.465354  | 0.1273792  | -0.3735342 |                            |                                                              |
| 20 | 10342481 | 0.2636796 | -0.107209  | -0.3694492 |                            |                                                              |
| 20 | 10338256 | 0.2001066 | -0.1792948 | -0.3669922 |                            |                                                              |
| 20 | 10340821 | 0.4197158 | 0.3292636  | -0.3663652 |                            |                                                              |
| 20 | 10343663 | 0.2495552 | -0.2222516 | -0.3659642 |                            |                                                              |
| 20 | 10480087 | 0.6360562 | -0.3486038 | -0.3655598 | Gm13310                    | karyopherin (importin) alpha 2 pseudogene                    |
| 20 | 10341258 | 0.5104874 | 0.2429788  | -0.3641016 |                            |                                                              |
| 20 | 10341486 | 0.5024092 | 0.3532854  | -0.363378  |                            |                                                              |
| 20 | 10343847 | 0.2309142 | -0.1924114 | -0.3622578 |                            |                                                              |
| 20 | 10546725 | 0.2655284 | 0.0011786  | -0.362254  | PDZRN3                     | PDZ domain containing ring finger 3                          |
| 20 | 10535759 | 0.2798422 | -0.2407582 | -0.3622442 | LNK2                       | ligand of numb-protein X 2                                   |
| 20 | 10554839 | 0.237164  | -0.097786  | -0.361844  | PICALM                     | phosphatidylinositol binding clathrin assembly protein       |
| 20 | 10508887 | 0.504226  | 0.0266234  | -0.3596724 | NR0B2                      | nuclear receptor subfamily 0, group B, member 2              |
| 20 | 10338912 | 0.2287932 | 0.0015392  | -0.3552054 |                            |                                                              |
| 20 | 10497703 | 0.2541964 | 0.1987722  | -0.3546882 | MRPL47                     | mitochondrial ribosomal protein L47                          |
| 20 | 10338263 | 0.980338  | -0.7446428 | -0.3533042 |                            |                                                              |
| 20 | 10341813 | 0.4079336 | -0.3281372 | -0.3531508 |                            |                                                              |
| 20 | 10362440 | 0.2318646 | -0.148573  | -0.351924  | TRDN                       | triadin                                                      |
| 20 | 10342331 | 0.2835282 | -0.2438488 | -0.3503836 |                            |                                                              |
| 20 | 10339107 | 0.3491866 | -0.3671802 | -0.3488292 |                            |                                                              |
| 20 | 10568521 | 0.2836492 | 0.0567514  | -0.3469452 | C10orf88                   | chromosome 10 open reading frame 88                          |
| 20 | 10343017 | 0.3203094 | 0.199494   | -0.3462    |                            |                                                              |
| 20 | 10340778 | 0.211222  | -0.1643596 | -0.3452888 |                            |                                                              |
| 20 | 10339909 | 0.3177412 | -0.0916206 | -0.3419212 |                            |                                                              |
| 20 | 10338241 | 0.2566804 | -0.0654764 | -0.3399122 |                            |                                                              |
| 20 | 10343702 | 0.2664206 | 0.1678698  | -0.3395154 |                            |                                                              |
| 20 | 10338756 | 0.2966314 | -0.0715898 | -0.3386224 |                            |                                                              |
| 20 | 10344054 | 0.2399916 | -0.111099  | -0.3380212 |                            |                                                              |
| 20 | 10338816 | 0.5296906 | -0.5589852 | -0.3338036 |                            |                                                              |
| 20 | 10492598 | 0.3445658 | 0.147439   | -0.3330144 | NMD3                       | NMD3 homolog (S. cerevisiae)                                 |
| 20 | 10342142 | 0.529543  | -0.2637208 | -0.3320708 |                            |                                                              |
| 20 | 10343845 | 0.3095974 | -0.2382986 | -0.3320534 |                            |                                                              |
| 20 | 10558740 | 0.255596  | 0.0360934  | -0.3292526 |                            |                                                              |
| 20 | 10338379 | 0.4398998 | 0.0656206  | -0.3281644 |                            |                                                              |
| 20 | 10338133 | 0.3178272 | -0.15564   | -0.3277312 |                            |                                                              |
| 20 | 10343929 | 0.2806872 | -0.114874  | -0.3276234 |                            |                                                              |
| 20 | 10339952 | 0.2097328 | -0.0276578 | -0.3263398 |                            |                                                              |
| 20 | 10572161 | 0.3246518 | 0.2603094  | -0.3258862 | ZNF440/ZNF808              | zinc finger protein 440                                      |
| 20 | 10472589 | 0.3723498 | -0.033817  | -0.3257978 | PHOSPHO2                   | phosphatase, orphan 2                                        |
| 20 | 10386622 | 0.3027248 | -0.1168884 | -0.3255366 | Gm12618                    | predicted gene 12618                                         |
| 20 | 10343326 | 0.5007962 | -0.058772  | -0.324937  |                            |                                                              |
| 20 | 10497503 | 0.473796  | -0.198218  | -0.323924  | KPNA2                      | karyopherin alpha 2 (RAG cohort 1, importin alpha 1)         |
| 20 | 10479761 | 0.6120444 | -0.2749928 | -0.3218364 | MEIG1                      | meiosis expressed gene 1 homolog (mouse)                     |
| 20 | 10448212 | 0.2916872 | 0.198233   | -0.321343  |                            |                                                              |
| 20 | 10392284 | 0.47657   | -0.224428  | -0.3211    | KPNA2                      | karyopherin alpha 2 (RAG cohort 1, importin alpha 1)         |
| 20 | 10342954 | 0.2564738 | -0.1586146 | -0.3207736 |                            |                                                              |
| 20 | 10343538 | 0.31169   | -0.126509  | -0.3207678 |                            |                                                              |
| 20 | 10453512 | 0.521456  | -0.21619   | -0.320422  | KPNA2                      | karyopherin alpha 2 (RAG cohort 1, importin alpha 1)         |
| 20 | 10554733 | 0.2926772 | -0.2801242 | -0.3198218 | Olf292 (includes others)   | olfactory receptor 295                                       |
| 20 | 10556463 | 0.3617934 | 0.0626656  | -0.3192186 | ARNTL                      | aryl hydrocarbon receptor nuclear translocator-like          |
| 20 | 10344136 | 0.6177462 | -0.2347244 | -0.317568  |                            |                                                              |
| 20 | 10343546 | 0.5458966 | -0.1054428 | -0.3169026 |                            |                                                              |
| 20 | 10397541 | 0.4853912 | 0.2960084  | -0.3168666 | EG544883 (includes others) | predicted gene 8300                                          |
| 20 | 10505917 | 0.2561528 | 0.0375116  | -0.3160828 |                            |                                                              |
| 20 | 10342637 | 0.2651132 | -0.1432048 | -0.3160302 |                            |                                                              |
| 20 | 10343033 | 0.3045594 | -0.075381  | -0.3148448 |                            |                                                              |
| 20 | 10338975 | 0.4134052 | -0.3140874 | -0.3117558 |                            |                                                              |



|    |          |           |            |            |                                 |                                                                                     |
|----|----------|-----------|------------|------------|---------------------------------|-------------------------------------------------------------------------------------|
| 20 | 10401829 | 0.4341516 | 0.3559566  | -0.3110054 | EIF1AY                          | eukaryotic translation initiation factor 1A, Y-linked                               |
| 20 | 10405160 | 0.2677966 | -0.0544282 | -0.3088274 |                                 |                                                                                     |
| 20 | 10341751 | 0.36525   | -0.3430948 | -0.3050218 |                                 |                                                                                     |
| 20 | 10338078 | 0.226738  | 0.087915   | -0.3042024 |                                 |                                                                                     |
| 20 | 10446617 | 0.252704  | -0.2106294 | -0.302814  |                                 |                                                                                     |
| 20 | 10561787 | 0.2826048 | -0.026994  | -0.30199   | ZNF585A                         | zinc finger protein 585A                                                            |
| 20 | 10564015 | 0.2123024 | -0.0919588 | -0.3019384 |                                 |                                                                                     |
| 20 | 10486026 | 0.3478704 | -0.046448  | -0.300158  | ZNF770                          | zinc finger protein 770                                                             |
| 20 | 10341483 | 0.50961   | 0.4178068  | -0.2993896 |                                 |                                                                                     |
| 20 | 10479833 | 0.2091502 | -0.171265  | -0.2991524 | OPTN                            | optineurin                                                                          |
| 20 | 10343152 | 0.4707652 | -0.0117906 | -0.2983712 |                                 |                                                                                     |
| 20 | 10341308 | 0.4586628 | 0.4238358  | -0.2976106 |                                 |                                                                                     |
| 20 | 10376555 | 0.3884326 | -0.262665  | -0.2969252 | COPS3                           | COP9 constitutive photomorphogenic homolog subunit 3 (Arabidopsis)                  |
| 20 | 10359888 | 0.2475466 | -0.044394  | -0.2963442 | Gm5265                          | predicted pseudogene 5265                                                           |
| 20 | 10506125 | 0.397109  | -0.199631  | -0.295652  | ANGPTL3                         | angiopoietin-like 3                                                                 |
| 20 | 10340000 | 0.2523664 | -0.0949048 | -0.2953142 |                                 |                                                                                     |
| 20 | 10338699 | 0.3521438 | -0.2200492 | -0.294761  |                                 |                                                                                     |
| 20 | 10338770 | 0.441216  | 0.1014248  | -0.2910876 |                                 |                                                                                     |
| 20 | 10366737 | 0.257942  | -0.0633168 | -0.2906514 |                                 |                                                                                     |
| 20 | 10338113 | 0.7282536 | -0.0818906 | -0.2896872 |                                 |                                                                                     |
| 20 | 10343263 | 0.2260384 | 0.0259664  | -0.2894444 |                                 |                                                                                     |
| 20 | 10595909 | 0.3923746 | 0.267524   | -0.2890164 |                                 |                                                                                     |
| 20 | 10407124 | 0.564428  | -0.2966796 | -0.2867788 | PDE4D                           | phosphodiesterase 4D, cAMP-specific                                                 |
| 20 | 10510254 | 0.3346426 | -0.0830886 | -0.2864916 | AU040096/Fv1                    | Friend virus susceptibility 1                                                       |
| 20 | 10341290 | 0.3884472 | 0.3200552  | -0.2848336 |                                 |                                                                                     |
| 20 | 10338795 | 0.39399   | 0.0526006  | -0.2843264 |                                 |                                                                                     |
| 20 | 10341090 | 0.3199266 | 0.1323048  | -0.2833218 |                                 |                                                                                     |
| 20 | 10342652 | 0.4845652 | 0.0189762  | -0.2826234 |                                 |                                                                                     |
| 20 | 10353750 | 0.2648568 | -0.0261606 | -0.2806998 | BAG2                            | BCL2-associated athanogene 2                                                        |
| 20 | 10339714 | 0.3777556 | -0.2116314 | -0.2805014 |                                 |                                                                                     |
| 20 | 10343558 | 0.632146  | 0.044108   | -0.280047  |                                 |                                                                                     |
| 20 | 10342256 | 0.4002872 | -0.0240036 | -0.2792786 |                                 |                                                                                     |
| 20 | 10344513 | 0.665013  | 0.4402642  | -0.2779754 |                                 |                                                                                     |
| 20 | 10340334 | 0.6289096 | -0.1060048 | -0.27795   |                                 |                                                                                     |
| 20 | 10414179 | 0.5251626 | -0.0279104 | -0.2778366 |                                 |                                                                                     |
| 20 | 10404996 | 0.2325064 | -0.03296   | -0.276548  | NINJ1                           | ninjurin 1                                                                          |
| 20 | 10489343 | 0.3075664 | -0.0994946 | -0.2746374 | PTPLA                           | protein tyrosine phosphatase-like (proline instead of catalytic arginine), member A |
| 20 | 10539015 | 0.4682866 | -0.114757  | -0.273701  |                                 |                                                                                     |
| 20 | 10342569 | 0.3060498 | 0.1482588  | -0.2733694 |                                 |                                                                                     |
| 20 | 10340813 | 0.4497486 | -0.0036072 | -0.2724442 |                                 |                                                                                     |
| 20 | 10479221 | 0.3039088 | -0.2767886 | -0.270272  | 2010315B03Rik (includes others) | zinc finger protein 781                                                             |
| 20 | 10340042 | 0.3276582 | -0.2271098 | -0.2696182 |                                 |                                                                                     |
| 20 | 10343501 | 0.7053814 | -0.0700242 | -0.2648274 |                                 |                                                                                     |
| 20 | 10340588 | 0.4251332 | -0.0234164 | -0.2647014 |                                 |                                                                                     |
| 20 | 10606436 | 0.3521406 | -0.159795  | -0.2628976 | HMGNS5                          | high-mobility group nucleosome binding domain 5                                     |
| 20 | 10394532 | 0.2352676 | 0.0248222  | -0.2624684 | UBE2F                           | ubiquitin-conjugating enzyme E2F (putative)                                         |
| 20 | 10344397 | 0.9440408 | -0.0594226 | -0.2610256 |                                 |                                                                                     |
| 20 | 10425299 | 0.3154304 | -0.1615668 | -0.2597062 | TOMM22                          | translocase of outer mitochondrial membrane 22 homolog (yeast)                      |
| 20 | 10342715 | 0.2475508 | 0.08976    | -0.2595522 |                                 |                                                                                     |
| 20 | 10374450 | 0.3248384 | 0.0399424  | -0.2575436 |                                 |                                                                                     |
| 20 | 10605828 | 0.32769   | -0.1794206 | -0.2552532 | 1700010D01Rik (includes others) | RIKEN cDNA 1700010D01 gene                                                          |
| 20 | 10598837 | 0.4648872 | -0.0145822 | -0.253024  |                                 |                                                                                     |
| 20 | 10338337 | 0.394141  | -0.0526072 | -0.2518934 |                                 |                                                                                     |
| 20 | 10339382 | 0.4738318 | 0.13854    | -0.251284  |                                 |                                                                                     |
| 20 | 10340002 | 0.364307  | -0.3007348 | -0.2512508 |                                 |                                                                                     |
| 20 | 10586170 | 0.247895  | 0.0143348  | -0.2509784 |                                 |                                                                                     |
| 20 | 10338604 | 0.487776  | 0.146976   | -0.250478  |                                 |                                                                                     |
| 20 | 10598041 | 0.649572  | -0.14326   | -0.249606  |                                 |                                                                                     |
| 20 | 10343819 | 0.317844  | -0.008284  | -0.2495306 |                                 |                                                                                     |
| 20 | 10343273 | 0.6801512 | -0.4329952 | -0.249347  |                                 |                                                                                     |
| 20 | 10343586 | 0.5869242 | -0.2636704 | -0.248635  |                                 |                                                                                     |
| 20 | 10342246 | 0.6124502 | 0.1023462  | -0.247503  |                                 |                                                                                     |
| 20 | 10338407 | 0.2472068 | -0.092372  | -0.2462408 |                                 |                                                                                     |
| 20 | 10582969 | 0.2653332 | -0.0190964 | -0.2439236 |                                 |                                                                                     |
| 20 | 10532315 | 0.316247  | 0.0510548  | -0.243059  | AB010352                        | cDNA sequence AB010352                                                              |
| 20 | 10340735 | 0.3456258 | 0.1593414  | -0.242604  |                                 |                                                                                     |
| 20 | 10484584 | 0.3267332 | -0.1513266 | -0.2424556 |                                 |                                                                                     |
| 20 | 10338462 | 0.3350362 | -0.1480482 | -0.2422654 |                                 |                                                                                     |
| 20 | 10548563 | 0.526318  | -0.040072  | -0.241824  | EG667723/Ptp4a1                 | protein tyrosine phosphatase 4a1                                                    |
| 20 | 10340559 | 0.5259034 | -0.451817  | -0.2416974 |                                 |                                                                                     |
| 20 | 10604656 | 0.252109  | 0.0592874  | -0.2389208 | Xlr (includes others)           | X-linked lymphocyte-regulated complex                                               |
| 20 | 10366407 | 0.2508278 | 0.0305574  | -0.2383078 | Gm10752                         | predicted gene 10752                                                                |
| 20 | 10364091 | 0.6105248 | -0.3406658 | -0.2368674 |                                 |                                                                                     |
| 20 | 10397891 | 0.3968864 | -0.0587104 | -0.2362366 | C14orf109                       | chromosome 14 open reading frame 109                                                |
| 20 | 10344563 | 0.4312332 | -0.2565666 | -0.236055  |                                 |                                                                                     |
| 20 | 10463068 | 0.510622  | -0.041008  | -0.236034  | EG667723/Ptp4a1                 | protein tyrosine phosphatase 4a1                                                    |
| 20 | 10418002 | 0.396267  | 0.0420786  | -0.233875  | EG620119                        | H3 histone, family 3A pseudogene                                                    |
| 20 | 10342605 | 0.3180748 | -0.0805846 | -0.2338394 |                                 |                                                                                     |
| 20 | 10338726 | 0.326642  | -0.301374  | -0.2335006 |                                 |                                                                                     |
| 20 | 10344582 | 0.2817582 | -0.1855718 | -0.2329368 |                                 |                                                                                     |
| 20 | 10344566 | 1.7022998 | -0.0414816 | -0.2320412 |                                 |                                                                                     |
| 20 | 10343895 | 0.303694  | -0.0397352 | -0.2317912 |                                 |                                                                                     |

|    |          |           |            |            |                 |                                                                            |
|----|----------|-----------|------------|------------|-----------------|----------------------------------------------------------------------------|
| 20 | 10343551 | 1.1123732 | -0.525175  | -0.2313878 |                 |                                                                            |
| 20 | 10440284 | 0.2962486 | -0.0529352 | -0.231024  | C3orf38         | chromosome 3 open reading frame 38                                         |
| 20 | 10603254 | 0.2467368 | -0.0565962 | -0.2309192 | LARP4           | La ribonucleoprotein domain family, member 4                               |
| 20 | 10340143 | 0.5078258 | 0.053435   | -0.2293402 |                 |                                                                            |
| 20 | 10338574 | 0.2973928 | -0.0039226 | -0.2292    |                 |                                                                            |
| 20 | 10461671 | 0.271901  | -0.054972  | -0.2281144 | PATL1           | protein associated with topoisomerase II homolog 1 (yeast)                 |
| 20 | 10346250 | 0.460129  | -0.2501092 | -0.2277082 | MSTN            | myostatin                                                                  |
| 20 | 10409259 | 0.2561638 | -0.1095338 | -0.227662  |                 |                                                                            |
| 20 | 10548616 | 0.2869606 | -0.1738994 | -0.2260602 |                 |                                                                            |
| 20 | 10442219 | 0.270268  | -0.001999  | -0.225536  | Zfp52           | zinc finger protein 52                                                     |
| 20 | 10371830 | 0.533686  | -0.1496332 | -0.2251336 | ACTR6           | ARP6 actin-related protein 6 homolog (yeast)                               |
| 20 | 10543779 | 0.3486996 | -0.0700148 | -0.2250426 | mir-29          | microRNA 29a                                                               |
| 20 | 10338920 | 0.37544   | -0.102884  | -0.224462  |                 |                                                                            |
| 20 | 10399426 | 0.2563668 | -0.045225  | -0.2232704 |                 |                                                                            |
| 20 | 10344506 | 0.377921  | -0.3132704 | -0.2231796 |                 |                                                                            |
| 20 | 10339794 | 0.7022134 | -0.47803   | -0.221982  |                 |                                                                            |
| 20 | 10340665 | 0.3950986 | -0.056859  | -0.2214364 |                 |                                                                            |
| 20 | 10343240 | 0.2731104 | -0.121437  | -0.2211664 |                 |                                                                            |
| 20 | 10565962 | 0.2612216 | -0.0473884 | -0.2198064 | P2RY2           | purinergic receptor P2Y, G-protein coupled, 2                              |
| 20 | 10469575 | 0.4489004 | -0.08709   | -0.219806  | EG667723/Ptp4a1 | protein tyrosine phosphatase 4a1                                           |
| 20 | 10457400 | 0.318034  | -0.1962598 | -0.2196394 |                 |                                                                            |
| 20 | 10338647 | 0.5111746 | -0.190961  | -0.2194612 |                 |                                                                            |
| 20 | 10341566 | 0.6362822 | 0.329554   | -0.2183302 |                 |                                                                            |
| 20 | 10339808 | 0.6504954 | 0.3666534  | -0.2182886 |                 |                                                                            |
| 20 | 10385081 | 0.3495016 | -0.232445  | -0.2181372 | ANP32C          | acidic (leucine-rich) nuclear phosphoprotein 32 family, member C           |
| 20 | 10342901 | 0.5488752 | 0.148699   | -0.2167812 |                 |                                                                            |
| 20 | 10340147 | 0.5044524 | -0.0143524 | -0.216544  |                 |                                                                            |
| 20 | 10467489 | 0.417562  | -0.095854  | -0.216514  | EG667723/Ptp4a1 | protein tyrosine phosphatase 4a1                                           |
| 20 | 10419116 | 0.2479178 | -0.033169  | -0.2163342 | 1700001F09Rik   | predicted gene 8207                                                        |
| 20 | 10373832 | 0.5112614 | -0.0564748 | -0.215092  |                 |                                                                            |
| 20 | 10395198 | 0.35201   | -0.0940894 | -0.2148404 |                 |                                                                            |
| 20 | 10504884 | 0.251631  | 0.0197154  | -0.213143  | C9orf30         | chromosome 9 open reading frame 30                                         |
| 20 | 10533707 | 0.408492  | -0.10051   | -0.211133  | EG667723/Ptp4a1 | protein tyrosine phosphatase 4a1                                           |
| 20 | 10338838 | 0.3582894 | -0.1862962 | -0.210714  |                 |                                                                            |
| 20 | 10342063 | 0.3439312 | -0.115718  | -0.210568  |                 |                                                                            |
| 20 | 10343675 | 0.3843236 | -0.0217372 | -0.2103654 |                 |                                                                            |
| 20 | 10342140 | 0.431682  | 0.177564   | -0.209968  |                 |                                                                            |
| 20 | 10344589 | 0.3245888 | -0.0161794 | -0.2099448 |                 |                                                                            |
| 20 | 10343223 | 0.2661232 | -0.0698268 | -0.209499  |                 |                                                                            |
| 20 | 10340921 | 0.6442204 | -0.1737922 | -0.207783  |                 |                                                                            |
| 20 | 10340756 | 0.4530948 | -0.3905794 | -0.2073322 |                 |                                                                            |
| 20 | 10341181 | 0.4758146 | 0.0051352  | -0.2053178 |                 |                                                                            |
| 20 | 10338386 | 0.6479334 | -0.0755566 | -0.2052294 |                 |                                                                            |
| 20 | 10340834 | 0.331538  | -0.1519852 | -0.2050796 |                 |                                                                            |
| 20 | 10344265 | 0.3024488 | 0.0080764  | -0.2047568 |                 |                                                                            |
| 20 | 10340332 | 0.3009744 | 0.0070794  | -0.204087  |                 |                                                                            |
| 20 | 10341368 | 0.2836078 | -0.0826884 | -0.2030754 |                 |                                                                            |
| 20 | 10489870 | 0.4866326 | -0.0004382 | -0.2029494 | Gm11472         | ribosomal protein L17 pseudogene                                           |
| 20 | 10339630 | 0.64187   | 0.3509704  | -0.2020006 |                 |                                                                            |
| 20 | 10426827 | 0.343527  | -0.0979552 | -0.2004002 | LARP4           | La ribonucleoprotein domain family, member 4                               |
| 20 | 10442057 | 0.3515622 | 0.1166926  | -0.1996802 | RIOK2           | RIO kinase 2 (yeast)                                                       |
| 20 | 10344553 | 0.4116396 | -0.083162  | -0.1992284 |                 |                                                                            |
| 20 | 10405911 | 0.356437  | -0.2154884 | -0.197982  | Zfp595/Zfp759   | zinc finger protein 759                                                    |
| 20 | 10342315 | 0.5383944 | 0.2053484  | -0.1970136 |                 |                                                                            |
| 20 | 10342682 | 0.6011086 | 0.240776   | -0.1963092 |                 |                                                                            |
| 20 | 10408008 | 0.3704206 | -0.0893206 | -0.1961144 |                 |                                                                            |
| 20 | 10339819 | 0.2689412 | -0.03096   | -0.1945246 |                 |                                                                            |
| 20 | 10339523 | 0.628278  | 0.064476   | -0.191138  |                 |                                                                            |
| 20 | 10454543 | 0.2632724 | -0.0131296 | -0.189973  |                 |                                                                            |
| 20 | 10338935 | 0.5625414 | -0.3714554 | -0.1896158 |                 |                                                                            |
| 20 | 10338110 | 0.5843548 | -0.1036262 | -0.189376  |                 |                                                                            |
| 20 | 10340984 | 0.5107782 | 0.0501608  | -0.1876676 |                 |                                                                            |
| 20 | 10481111 | 0.4071512 | 0.1608202  | -0.1861356 |                 |                                                                            |
| 20 | 10604842 | 0.437677  | 0.082548   | -0.1845662 |                 |                                                                            |
| 20 | 10608709 | 0.3662556 | -0.0380956 | -0.1843648 |                 |                                                                            |
| 20 | 10362434 | 0.386882  | -0.234366  | -0.183384  | TRDN            | triadin                                                                    |
| 20 | 10503180 | 0.3411832 | -0.212259  | -0.182661  | CHD7            | chromodomain helicase DNA binding protein 7                                |
| 20 | 10531887 | 0.4279476 | 0.2101506  | -0.1825986 | SLC10A6         | solute carrier family 10 (sodium/bile acid cotransporter family), member 6 |
| 20 | 10341553 | 0.272189  | 0.009042   | -0.1822324 |                 |                                                                            |
| 20 | 10510191 | 0.8052642 | 0.1337214  | -0.1821594 | ZNF600/ZNF888   | zinc finger protein 600                                                    |
| 20 | 10496621 | 0.3214902 | -0.0466086 | -0.181638  | GTF2B           | general transcription factor IIB                                           |
| 20 | 10340155 | 0.704931  | -0.379694  | -0.18152   |                 |                                                                            |
| 20 | 10340187 | 0.5637264 | -0.0756206 | -0.177712  |                 |                                                                            |
| 20 | 10427718 | 0.4464534 | 0.1101344  | -0.1774128 | BRX1            | BRX1, biogenesis of ribosomes, homolog (S. cerevisiae)                     |
| 20 | 10424335 | 0.2650014 | -0.026686  | -0.177356  | RNF139          | ring finger protein 139                                                    |
| 20 | 10532157 | 0.4233972 | -0.1233208 | -0.1773106 | TMED5           | transmembrane emp24 protein transport domain containing 5                  |
| 20 | 10412607 | 0.2990356 | -0.1969768 | -0.1772468 | ABHD6           | abhydrolase domain containing 6                                            |
| 20 | 10384579 | 0.33005   | -0.088416  | -0.17675   | UGP2            | UDP-glucose pyrophosphorylase 2                                            |
| 20 | 10564448 | 0.315868  | 0.0492062  | -0.1760754 | ASB7            | ankyrin repeat and SOCS box containing 7                                   |
| 20 | 10375893 | 0.286024  | -0.169912  | -0.174676  | SAR1B           | SAR1 homolog B (S. cerevisiae)                                             |
| 20 | 10547858 | 0.489723  | -0.1406042 | -0.1729604 | GNB3            | guanine nucleotide binding protein (G protein), beta polypeptide 3         |

|    |          |           |            |            |               |                                                                                             |
|----|----------|-----------|------------|------------|---------------|---------------------------------------------------------------------------------------------|
| 20 | 10338964 | 0.5116012 | -0.2699386 | -0.1727404 |               |                                                                                             |
| 20 | 10338443 | 0.3419726 | -0.0455902 | -0.172658  |               |                                                                                             |
| 20 | 10586484 | 0.477402  | -0.141504  | -0.171782  | FAM96A        | family with sequence similarity 96, member A                                                |
| 20 | 10339526 | 0.3908352 | -0.294585  | -0.1693396 |               |                                                                                             |
| 20 | 10351430 | 0.446162  | 0.116796   | -0.169288  | RXRG          | retinoid X receptor, gamma                                                                  |
| 20 | 10560089 | 0.3365618 | -0.2127626 | -0.1688942 | Vmn1r86       | vomeronal 1 receptor 86                                                                     |
| 20 | 10540544 | 0.445642  | 0.2031182  | -0.1683276 | THUMPD3       | THUMP domain containing 3                                                                   |
| 20 | 10552118 | 0.5541726 | -0.2718264 | -0.1679856 | Gm12755       | predicted gene 12755                                                                        |
| 20 | 10589087 | 0.296672  | -0.1448874 | -0.1679338 | PRKAR2A       | protein kinase, cAMP-dependent, regulatory, type II, alpha                                  |
| 20 | 10341266 | 0.3106046 | -0.0162336 | -0.1667396 |               |                                                                                             |
| 20 | 10344026 | 0.4488932 | -0.3766104 | -0.166661  |               |                                                                                             |
| 20 | 10344208 | 0.3668412 | -0.0422856 | -0.1655322 |               |                                                                                             |
| 20 | 10339232 | 0.3956608 | 0.1401024  | -0.1653    |               |                                                                                             |
| 20 | 10529730 | 0.3330946 | -0.0648652 | -0.165062  |               |                                                                                             |
| 20 | 10594186 | 0.2788388 | -0.0697086 | -0.164956  |               |                                                                                             |
| 20 | 10493086 | 0.3579562 | -0.0752234 | -0.1643782 | HDGF          | hepatoma-derived growth factor                                                              |
| 20 | 10373355 | 0.335262  | -0.0140498 | -0.1629598 | SPRYD4        | SPRY domain containing 4                                                                    |
| 20 | 10416791 | 0.3449834 | -0.107756  | -0.1624826 |               |                                                                                             |
| 20 | 10490302 | 0.5885336 | -0.324808  | -0.1619158 | ZNF844        | zinc finger protein 844                                                                     |
| 20 | 10338870 | 0.4663534 | 0.0461542  | -0.161914  |               |                                                                                             |
| 20 | 10436046 | 0.3651512 | -0.0060084 | -0.1615962 |               |                                                                                             |
| 20 | 10340116 | 0.4728642 | -0.1623046 | -0.1607372 |               |                                                                                             |
| 20 | 10341981 | 0.6197348 | 0.3130374  | -0.1607192 |               |                                                                                             |
| 20 | 10342794 | 0.2735846 | -0.107767  | -0.1599756 |               |                                                                                             |
| 20 | 10578155 | 0.3268254 | -0.1905038 | -0.1588396 |               |                                                                                             |
| 20 | 10351259 | 0.2846822 | -0.0805408 | -0.1586188 | SLC19A2       | solute carrier family 19 (thiamine transporter), member 2                                   |
| 20 | 10415784 | 0.5427994 | -0.1498442 | -0.1579394 | TRIM13        | tripartite motif containing 13                                                              |
| 20 | 10342484 | 0.6037316 | 0.1926258  | -0.1578374 |               |                                                                                             |
| 20 | 10342994 | 0.5057786 | -0.3300474 | -0.1575352 |               |                                                                                             |
| 20 | 10512061 | 0.3318592 | -0.074238  | -0.1561212 | TAF9          | TAF9 RNA polymerase II, TATA box binding protein (TBP)-associated factor, 32kDa             |
| 20 | 10448030 | 0.439968  | 0.0826306  | -0.1547432 |               |                                                                                             |
| 20 | 10505532 | 0.3598238 | 0.0534804  | -0.1545564 |               |                                                                                             |
| 20 | 10565341 | 0.432667  | -0.1064054 | -0.154162  | Gm6155        | predicted pseudogene 6155                                                                   |
| 20 | 10428066 | 0.463638  | 0.1211974  | -0.1539634 | 1700084J12Rik | RIKEN cDNA 1700084J12 gene                                                                  |
| 20 | 10578763 | 0.5785008 | 0.2280154  | -0.1532012 | SAP30         | Sin3A-associated protein, 30kDa                                                             |
| 20 | 10338205 | 0.368721  | -0.0835972 | -0.1528422 |               |                                                                                             |
| 20 | 10460114 | 0.3133202 | -0.022919  | -0.1517882 |               |                                                                                             |
| 20 | 10458245 | 0.4079354 | -0.0393346 | -0.1504936 |               |                                                                                             |
| 20 | 10338514 | 0.817792  | -0.25683   | -0.15032   |               |                                                                                             |
| 20 | 10339122 | 0.4513984 | 0.0768154  | -0.1502898 |               |                                                                                             |
| 20 | 10476941 | 0.3301932 | -0.0286262 | -0.1481326 |               |                                                                                             |
| 20 | 10362939 | 0.3512334 | -0.162687  | -0.1472706 | EG215974      | glyceraldehyde-3-phosphate dehydrogenase pseudogene                                         |
| 20 | 10338076 | 0.4625404 | -0.2332684 | -0.1470302 |               |                                                                                             |
| 20 | 10344160 | 0.48324   | 0.278914   | -0.146742  |               |                                                                                             |
| 20 | 10392259 | 0.437614  | -0.1966554 | -0.1466318 | SMURF2        | SMAD specific E3 ubiquitin protein ligase 2                                                 |
| 20 | 10564567 | 0.289396  | -0.1234958 | -0.1452768 |               |                                                                                             |
| 20 | 10598081 | 0.676514  | -0.4412286 | -0.1446956 |               |                                                                                             |
| 20 | 10340099 | 0.411182  | 0.0379058  | -0.1443744 |               |                                                                                             |
| 20 | 10338088 | 0.332159  | 0.0363044  | -0.1439792 |               |                                                                                             |
| 20 | 10484720 | 0.2896198 | -0.0313542 | -0.1432822 | Olf1166       | olfactory receptor 1166                                                                     |
| 20 | 10342593 | 0.6859476 | -0.4213654 | -0.1431742 |               |                                                                                             |
| 20 | 10583376 | 0.3241384 | -0.1140238 | -0.1428612 | Olf1829       | olfactory receptor 829                                                                      |
| 20 | 10341051 | 0.8256572 | 0.111041   | -0.1425394 |               |                                                                                             |
| 20 | 10427603 | 0.2961026 | -0.0359052 | -0.1393286 |               |                                                                                             |
| 20 | 10341982 | 0.4710402 | -0.1775274 | -0.1377452 |               |                                                                                             |
| 20 | 10362432 | 0.408006  | -0.135282  | -0.137314  | TRDN          | triadin                                                                                     |
| 20 | 10579047 | 0.4332096 | -0.1116074 | -0.1368314 | LZTS1         | leucine zipper, putative tumor suppressor 1                                                 |
| 20 | 10574595 | 0.3144558 | -0.1199104 | -0.1365442 |               |                                                                                             |
| 20 | 10340680 | 0.5429532 | -0.0747878 | -0.1351196 |               |                                                                                             |
| 20 | 10343481 | 0.5149364 | -0.1399546 | -0.1343692 |               |                                                                                             |
| 20 | 10340752 | 0.511668  | 0.1071522  | -0.1340268 |               |                                                                                             |
| 20 | 10565514 | 0.326048  | -0.18798   | -0.1326666 | TMEM126A      | transmembrane protein 126A                                                                  |
| 20 | 10598062 | 0.7708504 | -0.2339634 | -0.1322978 |               |                                                                                             |
| 20 | 10344252 | 0.332487  | -0.2113676 | -0.1302538 |               |                                                                                             |
| 20 | 10439634 | 0.34333   | -0.0418246 | -0.129813  | GTPBP8        | GTP-binding protein 8 (putative)                                                            |
| 20 | 10468275 | 0.4533306 | 0.2081274  | -0.1296886 | PCGF6         | polycomb group ring finger 6                                                                |
| 20 | 10338120 | 0.439432  | 0.085132   | -0.12876   |               |                                                                                             |
| 20 | 10339394 | 0.3739452 | 0.0351744  | -0.1287392 |               |                                                                                             |
| 20 | 10341179 | 0.639894  | -0.3670022 | -0.1284212 |               |                                                                                             |
| 20 | 10473592 | 0.303059  | -0.0347958 | -0.1281328 | Olf1183       | olfactory receptor 1183                                                                     |
| 20 | 10343633 | 0.4393228 | 0.0870318  | -0.1274854 |               |                                                                                             |
| 20 | 10343080 | 0.4145872 | 0.0606494  | -0.126826  |               |                                                                                             |
| 20 | 10474477 | 0.3379834 | -0.1013642 | -0.1255444 |               |                                                                                             |
| 20 | 10355996 | 0.324212  | -0.066718  | -0.125184  | SLC25A6       | solute carrier family 25 (mitochondrial carrier; adenine nucleotide translocator), member 6 |
| 20 | 10340586 | 0.5570352 | 0.099532   | -0.1247026 |               |                                                                                             |
| 20 | 10420503 | 0.6233122 | 0.3045638  | -0.1240812 | SETDB2        | SET domain, bifurcated 2                                                                    |
| 20 | 10450904 | 0.6512008 | -0.1975366 | -0.1238382 | SCOC          | short coiled-coil protein                                                                   |
| 20 | 10339705 | 0.4561256 | 0.052212   | -0.1232954 |               |                                                                                             |
| 20 | 10552260 | 0.3187918 | -0.1002628 | -0.1226174 |               |                                                                                             |
| 20 | 10345174 | 0.3114848 | -0.1438432 | -0.1175596 | Gm9884        | predicted gene 9884                                                                         |
| 20 | 10572613 | 0.378118  | -0.034932  | -0.117492  | MRPL34        | mitochondrial ribosomal protein L34                                                         |
| 20 | 10354732 | 0.4018124 | -0.195804  | -0.117076  | HSPD1         | heat shock 60kDa protein 1 (chaperonin)                                                     |

|    |          |           |            |            |                                 |                                                                      |
|----|----------|-----------|------------|------------|---------------------------------|----------------------------------------------------------------------|
| 20 | 10381345 | 0.3581856 | -0.00755   | -0.116478  | PSME3                           | proteasome (prosome, macropain) activator subunit 3 (PA28 gamma; Ki) |
| 20 | 10355452 | 0.4480898 | -0.1694406 | -0.1157968 |                                 |                                                                      |
| 20 | 10528691 | 0.5019378 | -0.135054  | -0.115794  | Rheb (mouse)                    | Ras homolog enriched in brain                                        |
| 20 | 10583347 | 0.3930876 | 0.0196402  | -0.115688  | CHORDC1                         | cysteine and histidine-rich domain (CHORD) containing 1              |
| 20 | 10339757 | 0.6614656 | -0.1151198 | -0.1154322 |                                 |                                                                      |
| 20 | 10342486 | 0.383622  | -0.206866  | -0.115226  |                                 |                                                                      |
| 20 | 10342763 | 0.370554  | -0.025328  | -0.115128  |                                 |                                                                      |
| 20 | 10605552 | 0.3420016 | -0.083252  | -0.1148512 |                                 |                                                                      |
| 20 | 10368739 | 0.3311324 | 0.0012366  | -0.1146298 | GTF3C6                          | general transcription factor IIIC, polypeptide 6, alpha 35kDa        |
| 20 | 10343509 | 0.4224812 | 0.0041972  | -0.1128628 |                                 |                                                                      |
| 20 | 10379627 | 0.3923338 | -0.1686    | -0.1118916 |                                 |                                                                      |
| 20 | 10600588 | 0.4549734 | -0.1500438 | -0.1116676 |                                 |                                                                      |
| 20 | 10369890 | 0.3422736 | -0.163334  | -0.1097722 | CISD1                           | CDGSH iron sulfur domain 1                                           |
| 20 | 10340032 | 0.8241944 | 0.4563344  | -0.1077386 |                                 |                                                                      |
| 20 | 10339101 | 0.5539822 | -0.078086  | -0.10691   |                                 |                                                                      |
| 20 | 10518679 | 0.5057334 | -0.1409794 | -0.1057906 | NMNAT1                          | nicotinamide nucleotide adenylyltransferase 1                        |
| 20 | 10535623 | 0.3988052 | 0.0037796  | -0.1057822 | 1700001J03Rik (includes others) | RIKEN cDNA 1700123K08 gene                                           |
| 20 | 10342860 | 0.411124  | -0.061116  | -0.10526   |                                 |                                                                      |
| 20 | 10369604 | 0.423583  | -0.1665968 | -0.1052346 | VPS26A                          | vacuolar protein sorting 26 homolog A (S. pombe)                     |
| 20 | 10341819 | 0.424844  | -0.2266818 | -0.1049486 |                                 |                                                                      |
| 20 | 10344118 | 0.3174466 | -0.0596546 | -0.1034402 |                                 |                                                                      |
| 20 | 10457927 | 0.6362774 | -0.0124284 | -0.1022158 |                                 |                                                                      |
| 20 | 10342960 | 0.4785154 | -0.2215686 | -0.101964  |                                 |                                                                      |
| 20 | 10339881 | 0.7222704 | -0.0124696 | -0.1004908 |                                 |                                                                      |
| 20 | 10503176 | 0.325241  | -0.0981758 | -0.1001332 | CHD7                            | chromodomain helicase DNA binding protein 7                          |
| 20 | 10475405 | 0.3805114 | -0.118998  | -0.097606  | EIF3J                           | eukaryotic translation initiation factor 3, subunit J                |
| 20 | 10339110 | 0.4048998 | 0.0436752  | -0.0964794 |                                 |                                                                      |
| 20 | 10338085 | 0.4394274 | -0.04336   | -0.0949726 |                                 |                                                                      |
| 20 | 10503172 | 0.4802296 | -0.2222028 | -0.0926554 | CHD7                            | chromodomain helicase DNA binding protein 7                          |
| 20 | 10341569 | 0.6243144 | 0.0504196  | -0.091793  |                                 |                                                                      |
| 20 | 10340607 | 0.395543  | 0.0401196  | -0.09132   |                                 |                                                                      |
| 20 | 10587746 | 0.3757024 | -0.01927   | -0.091072  | TMEM41B                         | transmembrane protein 41B                                            |
| 20 | 10339913 | 0.3579364 | -0.0750344 | -0.0904062 |                                 |                                                                      |
| 20 | 10354418 | 0.3484304 | -0.0598606 | -0.0864406 | OBFC2A                          | oligonucleotide/oligosaccharide-binding fold containing 2A           |
| 20 | 10342350 | 0.557064  | -0.1862    | -0.0860212 |                                 |                                                                      |
| 20 | 10344114 | 0.4212298 | 0.064964   | -0.0848634 |                                 |                                                                      |
| 20 | 10342646 | 0.6016912 | 0.104009   | -0.083795  |                                 |                                                                      |
| 20 | 10374793 | 0.6811498 | 0.4103276  | -0.0836438 | PNPT1                           | polyribonucleotide nucleotidyltransferase 1                          |
| 20 | 10339698 | 0.6993828 | -0.2716138 | -0.0833668 |                                 |                                                                      |
| 20 | 10361790 | 0.425616  | 0.02688    | -0.080446  | FUCA2                           | fucosidase, alpha-L- 2, plasma                                       |
| 20 | 10511865 | 0.40034   | 0.01834    | -0.079754  | PTGES3                          | prostaglandin E synthase 3 (cytosolic)                               |
| 20 | 10482323 | 0.466557  | -0.1702808 | -0.0781854 | PPP6C                           | protein phosphatase 6, catalytic subunit                             |
| 20 | 10539649 | 0.3814502 | 0.002222   | -0.075546  | PTGES3                          | prostaglandin E synthase 3 (cytosolic)                               |
| 20 | 10340558 | 0.5843748 | 0.1657176  | -0.0751892 |                                 |                                                                      |
| 20 | 10485811 | 0.3726266 | -0.014166  | -0.0745212 | OlfR1313                        | olfactory receptor 1313                                              |
| 20 | 10482073 | 0.3703906 | -0.0907354 | -0.074358  |                                 |                                                                      |
| 20 | 10456904 | 0.4835962 | -0.1025052 | -0.0722584 | PSTPIP2                         | proline-serine-threonine phosphatase interacting protein 2           |
| 20 | 10339251 | 0.355416  | -0.036472  | -0.071092  |                                 |                                                                      |
| 20 | 10339471 | 0.4594668 | 0.011628   | -0.069144  |                                 |                                                                      |
| 20 | 10424347 | 0.4809562 | 0.0939558  | -0.06528   | Gm7691                          | ribosomal protein L17 pseudogene                                     |
| 20 | 10340870 | 0.6448888 | 0.1668276  | -0.0647374 |                                 |                                                                      |
| 20 | 10341369 | 0.678152  | -0.13765   | -0.063558  |                                 |                                                                      |
| 20 | 10340875 | 0.4267644 | 0.022312   | -0.0611472 |                                 |                                                                      |
| 20 | 10608710 | 0.5257508 | 0.1081174  | -0.0584548 |                                 |                                                                      |
| 20 | 10385466 | 0.390633  | -0.0190428 | -0.049913  | SGCD                            | sarcoglycan, delta (35kDa dystrophin-associated glycoprotein)        |
| 20 | 10341729 | 0.5369276 | 0.1953082  | -0.0439568 |                                 |                                                                      |
| 20 | 10340828 | 0.5882534 | 0.0167084  | -0.0371442 |                                 |                                                                      |
| 20 | 10532989 | 0.5041298 | 0.0390602  | -0.036244  | GATC                            | glutamyl-tRNA(Gln) amidotransferase, subunit C homolog (bacterial)   |
| 20 | 10342828 | 0.55565   | -0.115256  | -0.031172  |                                 |                                                                      |
| 20 | 10438690 | 0.4602944 | 0.0027208  | -0.0282524 | RFC4                            | replication factor C (activator 1) 4, 37kDa                          |
| 20 | 10343385 | 1.1086562 | 0.4540988  | -0.0146048 |                                 |                                                                      |
| 20 | 10344301 | 1.0129848 | 0.5253624  | -0.0119822 |                                 |                                                                      |
| 20 | 10400395 | 0.501193  | 0.0827344  | -0.0014052 | PPP2R3C                         | protein phosphatase 2, regulatory subunit B", gamma                  |
| 20 | 10446771 | 0.505998  | 0.02285    | 0.003388   | LCLAT1                          | lysocardiolipin acyltransferase 1                                    |
| 20 | 10447349 | 0.6428122 | 0.014972   | 0.009698   | CRIP1                           | cysteine-rich PDZ-binding protein                                    |
| 20 | 10343047 | 0.8830632 | 0.3467506  | 0.012497   |                                 |                                                                      |
| 20 | 10343995 | 0.6400986 | 0.060398   | 0.0532252  |                                 |                                                                      |
| 20 | 10343324 | 0.6063256 | 0.0454408  | 0.0540828  |                                 |                                                                      |
| 20 | 10601326 | 0.653302  | 0.0937466  | 0.055639   | UPRT                            | uracil phosphoribosyltransferase (FUR1) homolog (S. cerevisiae)      |
| 20 | 10338710 | 0.7532364 | 0.0567162  | 0.0565778  |                                 |                                                                      |
| 20 | 10598064 | 1.0858592 | -0.130216  | 0.0733384  |                                 |                                                                      |
| 20 | 10340048 | 0.6877526 | 0.0690378  | 0.0796044  |                                 |                                                                      |
| 20 | 10601328 | 0.9130072 | 0.1088154  | 0.094026   | UPRT                            | uracil phosphoribosyltransferase (FUR1) homolog (S. cerevisiae)      |
| 20 | 10342604 | 0.9727096 | 0.037674   | 0.133467   |                                 |                                                                      |
| 20 | 10341030 | 0.8904632 | 0.156412   | 0.1347218  |                                 |                                                                      |

**Online Table 8. List of differentially expressed genes on 4 dpi (log ratio > 1 or < -1, P value < 0.05)**

| Probe Set ID | 4 dpi     |                   | 7 dpi     |                   | 60 dpi    |                   | Symbol                   | Entrez Gene Name                                                             |
|--------------|-----------|-------------------|-----------|-------------------|-----------|-------------------|--------------------------|------------------------------------------------------------------------------|
|              | Log ratio | P values (t-test) | Log ratio | P values (t-test) | Log ratio | P values (t-test) |                          |                                                                              |
| 10455970     | 6.6       | 0.00              | 6.8       | 0.00              | 2.8       | 0.00              |                          |                                                                              |
| 10608681     | 5.1       | 0.00              | 6.3       | 0.00              | 1.4       | 0.00              | Gm4841                   | predicted gene 4841                                                          |
| 10569102     | 4.1       | 0.00              | 4.6       | 0.00              | 0.1       | 0.72              | IRF7                     | interferon regulatory factor 7                                               |
| 10462621     | 4.1       | 0.00              | 4.2       | 0.00              | 0.7       | 0.03              | IFIT3                    | interferon-induced protein with tetratricopeptide repeats 3                  |
| 10459066     | 3.9       | 0.00              | 6.3       | 0.00              | 1.0       | 0.00              | Gm4841                   | predicted gene 4841                                                          |
| 10376324     | 3.8       | 0.00              | 5.4       | 0.00              | 1.0       | 0.00              | Gm12250                  | predicted gene 12250                                                         |
| 10462623     | 3.7       | 0.00              | 3.8       | 0.00              | 0.4       | 0.18              | IFIT1B                   | interferon-induced protein with tetratricopeptide repeats 1B                 |
| 10462618     | 3.7       | 0.00              | 4.0       | 0.00              | 0.6       | 0.03              | IFIT3                    | interferon-induced protein with tetratricopeptide repeats 3                  |
| 10502791     | 3.4       | 0.00              | 3.7       | 0.00              | 0.6       | 0.02              | IFI44                    | interferon-induced protein 44                                                |
| 10376326     | 3.4       | 0.00              | 4.9       | 0.00              | 0.7       | 0.01              |                          |                                                                              |
| 10455961     | 3.3       | 0.00              | 4.3       | 0.00              | 1.1       | 0.00              | Iigp1                    | interferon inducible GTPase 1                                                |
| 10541307     | 3.2       | 0.00              | 3.5       | 0.00              | 0.2       | 0.15              | USP18                    | ubiquitin specific peptidase 18                                              |
| 10462613     | 3.2       | 0.00              | 3.7       | 0.00              | 0.3       | 0.05              | IFIT2                    | interferon-induced protein with tetratricopeptide repeats 2                  |
| 10399710     | 3.0       | 0.00              | 2.9       | 0.00              | 0.3       | 0.13              | RSAD2                    | radical S-adenosyl methionine domain containing 2                            |
| 10531407     | 2.9       | 0.00              | 4.9       | 0.00              | 1.0       | 0.00              | CXCL9                    | chemokine (C-X-C motif) ligand 9                                             |
| 10455954     | 2.8       | 0.00              | 3.9       | 0.00              | 0.6       | 0.03              | Gm4951                   | predicted gene 4951                                                          |
| 10461594     | 2.8       | 0.00              | 4.0       | 0.00              | 0.0       | 0.91              | Ms4a4b (includes others) | membrane-spanning 4-domains, subfamily A, member 4B                          |
| 10420308     | 2.7       | 0.00              | 5.1       | 0.00              | 0.1       | 0.44              | GZMB                     | granzyme B (granzyme 2, cytotoxic T-lymphocyte-associated serine esterase 1) |
| 10385500     | 2.6       | 0.00              | 4.3       | 0.00              | 0.4       | 0.06              | IRGM                     | immunity-related GTPase family, M                                            |
| 10385507     | 2.5       | 0.00              | 5.3       | 0.00              | 0.3       | 0.02              | 9930111J21Rik1/Gm12185   | predicted gene 12185                                                         |
| 10462390     | 2.5       | 0.00              | 4.1       | 0.00              | 0.4       | 0.08              | CD274                    | CD274 molecule                                                               |
| 10608646     | 2.4       | 0.00              | 3.4       | 0.00              | 0.8       | 0.00              |                          |                                                                              |
| 10385533     | 2.4       | 0.00              | 3.9       | 0.00              | 0.6       | 0.04              | 9930111J21Rik1/Gm12185   | predicted gene 12185                                                         |
| 10496580     | 2.3       | 0.00              | 3.5       | 0.00              | 0.3       | 0.02              | GBP4                     | guanylate binding protein 4                                                  |
| 10385518     | 2.3       | 0.00              | 3.8       | 0.00              | 0.7       | 0.03              | Tgtp1/Tgtp2              | T cell specific GTPase 1                                                     |
| 10420488     | 2.3       | 0.00              | 2.8       | 0.00              | 0.2       | 0.44              | PHF11                    | PHD finger protein 11                                                        |
| 10502801     | 2.3       | 0.00              | 2.9       | 0.00              | 0.3       | 0.21              | IFI44L                   | interferon-induced protein 44-like                                           |
| 10531724     | 2.3       | 0.00              | 3.8       | 0.00              | 0.7       | 0.00              | PLAC8                    | placenta-specific 8                                                          |
| 10351873     | 2.3       | 0.00              | 3.2       | 0.00              | 0.2       | 0.09              | Ifi204 (includes others) | interferon activated gene 204                                                |
| 10531415     | 2.2       | 0.00              | 3.4       | 0.00              | 0.3       | 0.05              | CXCL10                   | chemokine (C-X-C motif) ligand 10                                            |
| 10420483     | 2.2       | 0.00              | 3.1       | 0.00              | 0.2       | 0.14              | Phf11a/Phf11b            | PHD finger protein 11A                                                       |
| 10437224     | 2.1       | 0.00              | 2.2       | 0.00              | 0.1       | 0.44              | Mx1/Mx2                  | myxovirus (influenza virus) resistance 1                                     |
| 10351880     | 2.1       | 0.00              | 2.4       | 0.00              | 0.2       | 0.24              | Pydc3/Pydc4              | pyrin domain containing 4                                                    |
| 10455957     | 2.1       | 0.00              | 3.3       | 0.00              | 0.5       | 0.06              |                          |                                                                              |
| 10389207     | 2.0       | 0.00              | 3.5       | 0.00              | 0.2       | 0.02              | CCL5                     | chemokine (C-C motif) ligand 5                                               |
| 10531994     | 2.0       | 0.00              | 3.2       | 0.00              | 0.2       | 0.26              |                          |                                                                              |
| 10434778     | 2.0       | 0.00              | 2.6       | 0.00              | 0.2       | 0.51              | RTP4                     | receptor (chemosensory) transporter protein 4                                |
| 10574145     | 1.9       | 0.00              | 3.3       | 0.00              | 0.4       | 0.01              | NLRC5                    | NLR family, CARD domain containing 5                                         |
| 10524621     | 1.9       | 0.00              | 2.6       | 0.00              | 0.2       | 0.23              | Oas12                    | 2'-5' oligoadenylate synthetase-like 2                                       |
| 10395039     | 1.9       | 0.00              | 1.5       | 0.00              | 0.2       | 0.25              | CMPK2                    | cytidine monophosphate (UMP-CMP) kinase 2, mitochondrial                     |
| 10441233     | 1.9       | 0.00              | 2.2       | 0.00              | 0.1       | 0.25              | Mx1/Mx2                  | myxovirus (influenza virus) resistance 1                                     |
| 10496569     | 1.9       | 0.00              | 3.0       | 0.00              | 0.5       | 0.03              | GBP7                     | guanylate binding protein 7                                                  |
| 10379518     | 1.9       | 0.00              | 3.3       | 0.00              | -0.1      | 0.70              | CCL7                     | chemokine (C-C motif) ligand 7                                               |
| 10379636     | 1.8       | 0.00              | 3.0       | 0.00              | 0.0       | 0.80              | SLFN12L                  | schlafen family member 12-like                                               |
| 10496555     | 1.8       | 0.00              | 3.7       | 0.00              | 0.4       | 0.09              | GBP2                     | guanylate binding protein 2, interferon-inducible                            |
| 10379511     | 1.8       | 0.00              | 3.3       | 0.00              | -0.1      | 0.43              | Ccl2                     | chemokine (C-C motif) ligand 2                                               |
| 10571984     | 1.8       | 0.00              | 2.4       | 0.00              | 0.4       | 0.05              | DDX60                    | DEAD (Asp-Glu-Ala-Asp) box polypeptide 60                                    |
| 10574149     | 1.8       | 0.00              | 3.1       | 0.00              | 0.5       | 0.00              | NLRC5                    | NLR family, CARD domain containing 5                                         |
| 10532019     | 1.8       | 0.00              | 3.5       | 0.00              | 0.2       | 0.15              | Gbp6 (includes others)   | guanylate binding protein 6                                                  |
| 10531987     | 1.8       | 0.00              | 3.2       | 0.00              | 0.4       | 0.09              | Gbp6 (includes others)   | guanylate binding protein 6                                                  |
| 10496592     | 1.8       | 0.00              | 3.3       | 0.00              | 0.5       | 0.05              |                          |                                                                              |
| 10393573     | 1.7       | 0.00              | 2.4       | 0.00              | 0.2       | 0.47              | LGALS3BP                 | lectin, galactoside-binding, soluble, 3 binding protein                      |
| 10346191     | 1.7       | 0.00              | 3.0       | 0.00              | 0.4       | 0.00              | STAT1                    | signal transducer and activator of transcription 1, 91kDa                    |
| 10378068     | 1.7       | 0.00              | 2.3       | 0.00              | 0.2       | 0.07              | XAF1                     | XIAP associated factor 1                                                     |
| 10360398     | 1.7       | 0.00              | 2.1       | 0.00              | 0.1       | 0.34              | Ifi202b                  | interferon activated gene 202B                                               |
| 10566366     | 1.7       | 0.00              | 2.3       | 0.00              | -0.1      | 0.80              | Trim30a/Trim30d          | tripartite motif-containing 30A                                              |
| 10533246     | 1.7       | 0.00              | 2.5       | 0.00              | 0.3       | 0.20              | OAS1                     | 2'-5'-oligoadenylate synthetase 1, 40/46kDa                                  |
| 10490150     | 1.7       | 0.00              | 3.1       | 0.00              | 0.2       | 0.07              | ZBP1                     | Z-DNA binding protein 1                                                      |
| 10538590     | 1.7       | 0.00              | 2.7       | 0.00              | 0.3       | 0.14              | HERC6                    | HECT and RLD domain containing E3 ubiquitin protein ligase family member 6   |
| 10344566     | 1.7       | 0.01              | 0.0       | 0.93              | -0.2      | 0.58              |                          |                                                                              |
| 10574098     | 1.7       | 0.00              | 2.7       | 0.00              | 0.5       | 0.00              | NLRC5                    | NLR family, CARD domain containing 5                                         |
| 10450075     | 1.7       | 0.00              | 2.7       | 0.00              | 0.7       | 0.00              | HLA-B                    | major histocompatibility complex,                                            |

|          |     |      |      |      |      |      |                          |                                                                                           |
|----------|-----|------|------|------|------|------|--------------------------|-------------------------------------------------------------------------------------------|
| 10450325 | 1.7 | 0.00 | 3.3  | 0.00 | 0.7  | 0.00 | CFB                      | class I, B                                                                                |
| 10444814 | 1.6 | 0.00 | 2.7  | 0.00 | 0.7  | 0.00 | HLA-B                    | complement factor B<br>major histocompatibility complex,<br>class I, B                    |
| 10524631 | 1.6 | 0.00 | 1.5  | 0.00 | 0.0  | 0.92 | OASL                     | 2'-5'-oligoadenylate synthetase-like                                                      |
| 10439009 | 1.6 | 0.00 | 1.9  | 0.00 | 0.3  | 0.16 | APOD                     | apolipoprotein D                                                                          |
| 10563597 | 1.6 | 0.00 | 2.7  | 0.00 | -0.2 | 0.23 | Saa3                     | serum amyloid A 3                                                                         |
| 10391207 | 1.6 | 0.00 | 2.1  | 0.00 | 0.2  | 0.25 | DHX58                    | DEXH (Asp-Glu-X-His) box<br>polypeptide 58                                                |
| 10496539 | 1.6 | 0.00 | 2.6  | 0.00 | 0.5  | 0.01 | GBP5                     | guanylate binding protein 5                                                               |
| 10338384 | 1.6 | 0.02 | -0.7 | 0.24 | -0.5 | 0.21 |                          |                                                                                           |
| 10398075 | 1.5 | 0.00 | 2.3  | 0.00 | 0.9  | 0.01 | SERPINA3                 | serpin peptidase inhibitor, clade A<br>(alpha-1 antiproteinase, antitrypsin),<br>member 3 |
| 10375515 | 1.5 | 0.00 | 3.0  | 0.00 | 0.2  | 0.02 |                          |                                                                                           |
| 10452980 | 1.5 | 0.00 | 1.7  | 0.00 | 0.1  | 0.52 | EIF2AK2                  | eukaryotic translation initiation factor<br>2-alpha kinase 2                              |
| 10574102 | 1.5 | 0.00 | 2.3  | 0.00 | 0.4  | 0.01 | NLRC5                    | NLR family, CARD domain<br>containing 5                                                   |
| 10439249 | 1.5 | 0.00 | 2.6  | 0.00 | 0.3  | 0.06 | PARP14                   | poly (ADP-ribose) polymerase<br>family, member 14                                         |
| 10360370 | 1.5 | 0.00 | 2.2  | 0.00 | 0.0  | 0.85 | Ifi204 (includes others) | interferon activated gene 204                                                             |
| 10512470 | 1.5 | 0.00 | 2.7  | 0.00 | 0.9  | 0.00 | CD72                     | CD72 molecule                                                                             |
| 10383206 | 1.5 | 0.00 | 1.9  | 0.00 | 0.2  | 0.40 |                          |                                                                                           |
| 10512067 | 1.5 | 0.00 | 1.9  | 0.00 | 0.2  | 0.27 | DDX58                    | DEAD (Asp-Glu-Ala-Asp) box<br>polypeptide 58                                              |
| 10566358 | 1.5 | 0.00 | 2.3  | 0.00 | 0.3  | 0.07 | Trim30a/Trim30d          | tripartite motif-containing 30A                                                           |
| 10547740 | 1.4 | 0.04 | 0.2  | 0.86 | 1.7  | 0.04 | C1S                      | complement component 1, s<br>subcomponent                                                 |
| 10483110 | 1.4 | 0.00 | 2.1  | 0.00 | 0.2  | 0.12 | IFIH1                    | interferon induced with helicase C<br>domain 1                                            |
| 10360373 | 1.4 | 0.00 | 1.6  | 0.00 | 0.3  | 0.07 | Pydc3/Pydc4              | pyrin domain containing 4                                                                 |
| 10531980 | 1.4 | 0.00 | 2.8  | 0.00 | 0.4  | 0.03 | Gbp6 (includes others)   | guanylate binding protein 6                                                               |
| 10439268 | 1.4 | 0.00 | 2.0  | 0.00 | 0.3  | 0.07 | DTX3L                    | deltex 3-like (Drosophila)                                                                |
| 10444244 | 1.4 | 0.00 | 2.8  | 0.00 | 0.3  | 0.01 | TAP1                     | transporter 1, ATP-binding cassette,<br>sub-family B (MDR/TAP)                            |
| 10531420 | 1.4 | 0.00 | 2.8  | 0.00 | 0.1  | 0.28 | Cxcl11                   | chemokine (C-X-C motif) ligand 11                                                         |
| 10383198 | 1.4 | 0.00 | 2.0  | 0.00 | 0.2  | 0.28 |                          |                                                                                           |
| 10574135 | 1.4 | 0.00 | 2.8  | 0.00 | 0.4  | 0.03 | NLRC5                    | NLR family, CARD domain<br>containing 5                                                   |
| 10379633 | 1.4 | 0.00 | 2.6  | 0.00 | 0.0  | 0.98 | S1fn1                    | schlafen 1                                                                                |
| 10385504 | 1.3 | 0.00 | 1.9  | 0.00 | 0.1  | 0.67 | Gm5431                   | predicted gene 5431                                                                       |
| 10574104 | 1.3 | 0.00 | 2.5  | 0.00 | 0.4  | 0.00 | NLRC5                    | NLR family, CARD domain<br>containing 5                                                   |
| 10466210 | 1.3 | 0.00 | 1.9  | 0.00 | -0.2 | 0.25 | MS4A6A                   | membrane-spanning 4-domains,<br>subfamily A, member 6A                                    |
| 10552406 | 1.3 | 0.00 | 4.0  | 0.00 | 0.2  | 0.05 | NKG7                     | natural killer cell group 7 sequence                                                      |
| 10412211 | 1.3 | 0.00 | 2.7  | 0.00 | 0.0  | 0.64 | GZMA                     | granzyme A (granzyme 1, cytotoxic<br>T-lymphocyte-associated serine<br>esterase 3)        |
| 10574157 | 1.3 | 0.00 | 2.4  | 0.00 | 0.2  | 0.06 | NLRC5                    | NLR family, CARD domain<br>containing 5                                                   |
| 10450675 | 1.3 | 0.00 | 1.9  | 0.00 | 0.3  | 0.06 | H2-T24                   | histocompatibility 2, T region locus<br>24                                                |
| 10450694 | 1.3 | 0.00 | 2.5  | 0.00 | 0.6  | 0.00 | H2-T22                   | histocompatibility 2, T region locus<br>22                                                |
| 10383212 | 1.3 | 0.00 | 2.0  | 0.00 | 0.1  | 0.08 | Rnf213                   | ring finger protein 213                                                                   |
| 10383208 | 1.3 | 0.00 | 1.9  | 0.00 | 0.1  | 0.52 |                          |                                                                                           |
| 10383200 | 1.3 | 0.00 | 2.0  | 0.00 | 0.2  | 0.26 |                          |                                                                                           |
| 10525158 | 1.3 | 0.00 | 1.6  | 0.00 | 0.0  | 0.92 | Oas1b                    | 2'-5'-oligoadenylate synthetase 1B                                                        |
| 10574139 | 1.3 | 0.00 | 2.5  | 0.00 | 0.4  | 0.00 | NLRC5                    | NLR family, CARD domain<br>containing 5                                                   |
| 10533198 | 1.3 | 0.00 | 1.6  | 0.00 | 0.3  | 0.11 | OAS2                     | 2'-5'-oligoadenylate synthetase 2,<br>69/71kDa                                            |
| 10554240 | 1.3 | 0.00 | 1.7  | 0.00 | 0.1  | 0.17 | ISG20                    | interferon stimulated exonuclease<br>gene 20kDa                                           |
| 10473356 | 1.2 | 0.00 | 2.0  | 0.00 | 0.2  | 0.16 | UBE2L6                   | ubiquitin-conjugating enzyme E2L 6                                                        |
| 10383214 | 1.2 | 0.00 | 1.9  | 0.00 | 0.2  | 0.15 | Rnf213                   | ring finger protein 213                                                                   |
| 10389231 | 1.2 | 0.00 | 2.7  | 0.00 | 0.5  | 0.20 | CCL3L1/CCL3L3            | chemokine (C-C motif) ligand 3-like<br>1                                                  |
| 10383196 | 1.2 | 0.00 | 1.8  | 0.00 | 0.1  | 0.40 | Rnf213                   | ring finger protein 213                                                                   |
| 10444258 | 1.2 | 0.00 | 3.1  | 0.00 | 0.3  | 0.00 | PSMB8                    | proteasome (prosome, macropain)<br>subunit, beta type, 8                                  |
| 10383168 | 1.2 | 0.00 | 1.9  | 0.00 | 0.2  | 0.04 |                          |                                                                                           |
| 10608650 | 1.2 | 0.00 | 2.4  | 0.00 | 0.5  | 0.00 |                          |                                                                                           |
| 10383152 | 1.2 | 0.00 | 1.8  | 0.00 | 0.2  | 0.18 | Rnf213                   | ring finger protein 213                                                                   |
| 10544133 | 1.2 | 0.00 | 1.9  | 0.00 | 0.2  | 0.10 | PARP12                   | poly (ADP-ribose) polymerase<br>family, member 12                                         |
| 10383202 | 1.2 | 0.00 | 2.0  | 0.00 | 0.2  | 0.11 | Rnf213                   | ring finger protein 213                                                                   |
| 10415319 | 1.2 | 0.00 | 1.4  | 0.00 | 0.2  | 0.15 | IRF9                     | interferon regulatory factor 9                                                            |
| 10450682 | 1.2 | 0.00 | 2.3  | 0.00 | 0.5  | 0.00 | HLA-E                    | major histocompatibility complex,<br>class I, E                                           |
| 10444821 | 1.2 | 0.00 | 1.9  | 0.00 | 0.3  | 0.02 | H2-Q5                    | histocompatibility 2, Q region locus 5                                                    |
| 10451287 | 1.2 | 0.00 | 1.9  | 0.00 | 0.1  | 0.54 |                          |                                                                                           |
| 10359181 | 1.2 | 0.00 | 1.3  | 0.00 | 0.3  | 0.03 | TOR3A                    | torsin family 3, member A                                                                 |
| 10450699 | 1.2 | 0.00 | 2.0  | 0.00 | 0.5  | 0.00 | HLA-F                    | major histocompatibility complex,<br>class I, F                                           |
| 10402347 | 1.2 | 0.00 | 1.7  | 0.00 | -0.1 | 0.44 | IFI27L2                  | interferon, alpha-inducible protein 27-<br>like 2                                         |

|          |      |      |      |      |      |      |                          |                                                                                                       |
|----------|------|------|------|------|------|------|--------------------------|-------------------------------------------------------------------------------------------------------|
| 10347928 | 1.2  | 0.00 | 1.9  | 0.00 | 0.3  | 0.13 | SP110                    | SP110 nuclear body protein                                                                            |
| 10582874 | 1.2  | 0.00 | 1.9  | 0.00 | 0.3  | 0.13 | SP110                    | SP110 nuclear body protein                                                                            |
| 10383233 | 1.1  | 0.00 | 1.7  | 0.00 | 0.1  | 0.33 | Rnf213                   | ring finger protein 213                                                                               |
| 10383210 | 1.1  | 0.00 | 1.6  | 0.00 | 0.0  | 0.92 | Rnf213                   | ring finger protein 213                                                                               |
| 10351509 | 1.1  | 0.00 | 3.2  | 0.00 | 0.6  | 0.01 | FCGR3A                   | Fc fragment of IgG, low affinity IIIa, receptor (CD16a)                                               |
| 10383204 | 1.1  | 0.00 | 1.9  | 0.00 | 0.2  | 0.12 | Rnf213                   | ring finger protein 213                                                                               |
| 10398039 | 1.1  | 0.00 | 3.1  | 0.00 | 0.3  | 0.02 |                          |                                                                                                       |
| 10367224 | 1.1  | 0.00 | 1.7  | 0.00 | 0.1  | 0.48 | STAT2                    | signal transducer and activator of transcription 2, 113kDa                                            |
| 10347915 | 1.1  | 0.00 | 1.4  | 0.00 | 0.5  | 0.02 | Csprs (includes others)  | component of Sp100-rs                                                                                 |
| 10360382 | 1.1  | 0.00 | 1.5  | 0.00 | -0.1 | 0.38 | Ifi204 (includes others) | interferon activated gene 204                                                                         |
| 10590635 | 1.1  | 0.00 | 3.1  | 0.00 | 0.5  | 0.03 | CCR5                     | chemokine (C-C motif) receptor 5 (gene/pseudogene)                                                    |
| 10598013 | 1.1  | 0.00 | 3.1  | 0.00 | 0.5  | 0.03 | CCR5                     | chemokine (C-C motif) receptor 5 (gene/pseudogene)                                                    |
| 10578493 | 1.1  | 0.00 | 1.5  | 0.00 | 0.1  | 0.39 | TLR3                     | toll-like receptor 3                                                                                  |
| 10598976 | 1.1  | 0.01 | 3.3  | 0.00 | 0.2  | 0.48 | TIMP1                    | TIMP metalloproteinase inhibitor 1                                                                    |
| 10383194 | 1.1  | 0.01 | 1.5  | 0.00 | 0.1  | 0.70 | Rnf213                   | ring finger protein 213                                                                               |
| 10598064 | 1.1  | 0.04 | -0.1 | 0.71 | 0.1  | 0.86 |                          |                                                                                                       |
| 10566144 | 1.1  | 0.00 | 1.8  | 0.00 | 0.0  | 0.72 | TRIM21                   | tripartite motif containing 21                                                                        |
| 10360173 | 1.1  | 0.00 | 2.7  | 0.00 | 0.5  | 0.01 | SLAMF7                   | SLAM family member 7                                                                                  |
| 10424676 | 1.1  | 0.00 | 1.6  | 0.00 | 0.1  | 0.52 | LY6E                     | lymphocyte antigen 6 complex, locus E                                                                 |
| 10545672 | 1.1  | 0.00 | 2.0  | 0.00 | -0.2 | 0.02 | MTHFD2                   | methylenetetrahydrofolate dehydrogenase (NADP+ dependent) 2, methylenetetrahydrofolate cyclohydrolase |
| 10608680 | 1.1  | 0.00 | 2.1  | 0.00 | 0.5  | 0.00 | H2-T22                   | histocompatibility 2, T region locus 22                                                               |
| 10347925 | 1.1  | 0.00 | 1.4  | 0.00 | 0.6  | 0.02 | Csprs (includes others)  | component of Sp100-rs                                                                                 |
| 10466314 | 1.1  | 0.00 | 1.7  | 0.00 | 0.0  | 0.67 |                          |                                                                                                       |
| 10582997 | 1.1  | 0.00 | 2.0  | 0.00 | 0.3  | 0.09 | CASP4                    | caspase 4, apoptosis-related cysteine peptidase                                                       |
| 10383192 | 1.0  | 0.00 | 1.5  | 0.00 | -0.1 | 0.56 |                          |                                                                                                       |
| 10388902 | 1.0  | 0.00 | 1.2  | 0.00 | 0.1  | 0.24 | LGALS9                   | lectin, galactoside-binding, soluble, 9                                                               |
| 10500335 | 1.0  | 0.00 | 2.2  | 0.00 | 0.1  | 0.31 | FCGR1A                   | Fc fragment of IgG, high affinity Ia, receptor (CD64)                                                 |
| 10566578 | 1.0  | 0.00 | 1.4  | 0.00 | 0.2  | 0.19 | Gm8979                   | very large inducible GTPase 1 pseudogene                                                              |
| 10344121 | 1.0  | 0.01 | 0.0  | 0.94 | -0.5 | 0.44 |                          |                                                                                                       |
| 10397975 | 1.0  | 0.00 | 1.7  | 0.00 | 0.4  | 0.00 | IFI27                    | interferon, alpha-inducible protein 27                                                                |
| 10517165 | 1.0  | 0.00 | 3.0  | 0.00 | 1.0  | 0.00 | Cd52                     | CD52 antigen                                                                                          |
| 10338178 | 1.0  | 0.00 | 1.2  | 0.00 | 0.2  | 0.61 |                          |                                                                                                       |
| 10344301 | 1.0  | 0.04 | 0.5  | 0.24 | 0.0  | 0.98 |                          |                                                                                                       |
| 10491091 | 1.0  | 0.01 | 1.5  | 0.00 | 0.5  | 0.06 | TNFSF10                  | tumor necrosis factor (ligand) superfamily, member 10                                                 |
| 10534909 | 1.0  | 0.00 | 1.8  | 0.00 | 0.3  | 0.02 | SP110                    | SP110 nuclear body protein                                                                            |
| 10467136 | 1.0  | 0.00 | 2.3  | 0.00 | 0.1  | 0.56 | CH25H                    | cholesterol 25-hydroxylase                                                                            |
| 10566571 | 1.0  | 0.00 | 1.3  | 0.00 | 0.2  | 0.17 |                          |                                                                                                       |
| 10341044 | 1.0  | 0.02 | 0.3  | 0.55 | -0.5 | 0.48 |                          |                                                                                                       |
| 10581378 | 1.0  | 0.00 | 2.7  | 0.00 | 0.2  | 0.01 | PSMB10                   | proteasome (prosome, macropain) subunit, beta type, 10                                                |
| 10531972 | 1.0  | 0.00 | 2.7  | 0.00 | 0.2  | 0.18 | Gbp8                     | guanylate-binding protein 8                                                                           |
| 10343925 | 1.0  | 0.03 | -0.3 | 0.46 | -0.5 | 0.14 |                          |                                                                                                       |
| 10579532 | 1.0  | 0.00 | 1.7  | 0.00 | 0.0  | 0.89 | BST2                     | bone marrow stromal cell antigen 2                                                                    |
| 10340164 | 1.0  | 0.01 | 1.3  | 0.00 | 0.1  | 0.72 |                          |                                                                                                       |
| 10406928 | 1.0  | 0.00 | 2.8  | 0.00 | 0.9  | 0.01 | CD180                    | CD180 molecule                                                                                        |
| 10360070 | 1.0  | 0.00 | 1.7  | 0.00 | 0.5  | 0.01 | FCER1G                   | Fc fragment of IgE, high affinity I, receptor for; gamma polypeptide                                  |
| 10461614 | 1.0  | 0.00 | 1.4  | 0.00 | -0.2 | 0.22 | Ms4a6c                   | membrane-spanning 4-domains, subfamily A, member 6C                                                   |
| 10533213 | 1.0  | 0.00 | 1.7  | 0.00 | 0.0  | 0.84 | OAS3                     | 2'-5'-oligoadenylate synthetase 3, 100kDa                                                             |
| 10584047 | -1.0 | 0.03 | -0.5 | 0.08 | -0.3 | 0.18 | ADAMTS8                  | ADAM metalloproteinase with thrombospondin type 1 motif, 8                                            |
| 10340043 | -1.0 | 0.03 | -0.3 | 0.37 | 0.0  | 0.90 |                          |                                                                                                       |
| 10585390 | -1.0 | 0.00 | -0.2 | 0.45 | -0.2 | 0.72 | Sln                      | sarcophilin                                                                                           |
| 10463551 | -1.0 | 0.02 | -0.8 | 0.37 | -0.4 | 0.25 | ELOVL3                   | ELOVL fatty acid elongase 3                                                                           |
| 10558673 | -1.0 | 0.01 | -0.5 | 0.32 | -0.1 | 0.87 | CYP2E1                   | cytochrome P450, family 2, subfamily E, polypeptide 1                                                 |
| 10490913 | -1.0 | 0.04 | -0.4 | 0.56 | -0.6 | 0.10 | CA3                      | carbonic anhydrase III, muscle specific                                                               |
| 10581605 | -1.0 | 0.00 | 0.0  | 0.94 | 0.0  | 0.88 | HP                       | haptoglobin                                                                                           |
| 10340401 | -1.1 | 0.00 | -0.2 | 0.52 | 0.2  | 0.65 |                          |                                                                                                       |
| 10341006 | -1.2 | 0.01 | 0.6  | 0.28 | 0.8  | 0.11 |                          |                                                                                                       |
| 10438801 | -1.3 | 0.03 | -0.7 | 0.34 | -0.3 | 0.74 | FGF12                    | fibroblast growth factor 12                                                                           |
| 10343452 | -1.4 | 0.02 | 0.4  | 0.31 | 0.5  | 0.51 |                          |                                                                                                       |
| 10438813 | -1.5 | 0.02 | -0.3 | 0.67 | -0.3 | 0.70 | Mir690                   | microRNA 690                                                                                          |
| 10495306 | -1.5 | 0.04 | -0.8 | 0.38 | -0.2 | 0.83 | MYBPHL                   | myosin binding protein H-like                                                                         |
| 10384044 | -1.5 | 0.05 | -1.1 | 0.35 | -0.3 | 0.74 | MYL7                     | myosin, light chain 7, regulatory                                                                     |
| 10559698 | -1.6 | 0.01 | -0.5 | 0.42 | 0.2  | 0.80 | SGK110                   | putative uncharacterized serine/threonine-protein kinase SgK110-like                                  |

**Online Table 9. List of differentially expressed genes on 7 dpi (log ratio > 1 or < -1, P value < 0.05)**

| Probe Set ID | 4 dpi     |                   | 7 dpi     |                   | 60 dpi    |                   | Symbol                   | Entrez Gene Name                                                             |
|--------------|-----------|-------------------|-----------|-------------------|-----------|-------------------|--------------------------|------------------------------------------------------------------------------|
|              | Log ratio | P values (t-test) | Log ratio | P values (t-test) | Log ratio | P values (t-test) |                          |                                                                              |
| 10455970     | 6.6       | 0.00              | 6.8       | 0.00              | 2.8       | 0.00              |                          |                                                                              |
| 10459066     | 3.9       | 0.00              | 6.3       | 0.00              | 1.0       | 0.00              | Gm4841                   | predicted gene 4841                                                          |
| 10608681     | 5.1       | 0.00              | 6.3       | 0.00              | 1.4       | 0.00              | Gm4841                   | predicted gene 4841                                                          |
| 10376324     | 3.8       | 0.00              | 5.4       | 0.00              | 1.0       | 0.00              | Gm12250                  | predicted gene 12250                                                         |
| 10385507     | 2.5       | 0.00              | 5.3       | 0.00              | 0.3       | 0.02              | 9930111J21Rik1/Gm12185   | predicted gene 12185                                                         |
| 10420308     | 2.7       | 0.00              | 5.1       | 0.00              | 0.1       | 0.44              | GZMB                     | granzyme B (granzyme 2, cytotoxic T-lymphocyte-associated serine esterase 1) |
| 10531407     | 2.9       | 0.00              | 4.9       | 0.00              | 1.0       | 0.00              | CXCL9                    | chemokine (C-X-C motif) ligand 9                                             |
| 10376326     | 3.4       | 0.00              | 4.9       | 0.00              | 0.7       | 0.01              |                          |                                                                              |
| 10569102     | 4.1       | 0.00              | 4.6       | 0.00              | 0.1       | 0.72              | IRF7                     | interferon regulatory factor 7                                               |
| 10385500     | 2.6       | 0.00              | 4.3       | 0.00              | 0.4       | 0.06              | IRGM                     | immunity-related GTPase family, M                                            |
| 10455961     | 3.3       | 0.00              | 4.3       | 0.00              | 1.1       | 0.00              | Iigp1                    | interferon inducible GTPase 1                                                |
| 10462621     | 4.1       | 0.00              | 4.2       | 0.00              | 0.7       | 0.03              | IFIT3                    | interferon-induced protein with tetratricopeptide repeats 3                  |
| 10462390     | 2.5       | 0.00              | 4.1       | 0.00              | 0.4       | 0.08              | CD274                    | CD274 molecule                                                               |
| 10461594     | 2.8       | 0.00              | 4.0       | 0.00              | 0.0       | 0.91              | Ms4a4b (includes others) | membrane-spanning 4-domains, subfamily A, member 4B                          |
| 10462618     | 3.7       | 0.00              | 4.0       | 0.00              | 0.6       | 0.03              | IFIT3                    | interferon-induced protein with tetratricopeptide repeats 3                  |
| 10552406     | 1.3       | 0.00              | 4.0       | 0.00              | 0.2       | 0.05              | NKG7                     | natural killer cell group 7 sequence                                         |
| 10385533     | 2.4       | 0.00              | 3.9       | 0.00              | 0.6       | 0.04              | 9930111J21Rik1/Gm12185   | predicted gene 12185                                                         |
| 10455954     | 2.8       | 0.00              | 3.9       | 0.00              | 0.6       | 0.03              | Gm4951                   | predicted gene 4951                                                          |
| 10462623     | 3.7       | 0.00              | 3.8       | 0.00              | 0.4       | 0.18              | IFIT1B                   | interferon-induced protein with tetratricopeptide repeats 1B                 |
| 10531724     | 2.3       | 0.00              | 3.8       | 0.00              | 0.7       | 0.00              | PLAC8                    | placenta-specific 8                                                          |
| 10385518     | 2.3       | 0.00              | 3.8       | 0.00              | 0.7       | 0.03              | Tgtp1/Tgtp2              | T cell specific GTPase 1                                                     |
| 10502791     | 3.4       | 0.00              | 3.7       | 0.00              | 0.6       | 0.02              | IFI44                    | interferon-induced protein 44                                                |
| 10496555     | 1.8       | 0.00              | 3.7       | 0.00              | 0.4       | 0.09              | GBP2                     | guanylate binding protein 2, interferon-inducible                            |
| 10462613     | 3.2       | 0.00              | 3.7       | 0.00              | 0.3       | 0.05              | IFIT2                    | interferon-induced protein with tetratricopeptide repeats 2                  |
| 10496580     | 2.3       | 0.00              | 3.5       | 0.00              | 0.3       | 0.02              | GBP4                     | guanylate binding protein 4                                                  |
| 10389207     | 2.0       | 0.00              | 3.5       | 0.00              | 0.2       | 0.02              | CCL5                     | chemokine (C-C motif) ligand 5                                               |
| 10532019     | 1.8       | 0.00              | 3.5       | 0.00              | 0.2       | 0.15              | Gbp6 (includes others)   | guanylate binding protein 6                                                  |
| 10541307     | 3.2       | 0.00              | 3.5       | 0.00              | 0.2       | 0.15              | USP18                    | ubiquitin specific peptidase 18                                              |
| 10379535     | 0.8       | 0.00              | 3.5       | 0.00              | 0.9       | 0.01              | Ccl8                     | chemokine (C-C motif) ligand 8                                               |
| 10608646     | 2.4       | 0.00              | 3.4       | 0.00              | 0.8       | 0.00              |                          |                                                                              |
| 10531415     | 2.2       | 0.00              | 3.4       | 0.00              | 0.3       | 0.05              | CXCL10                   | chemokine (C-X-C motif) ligand 10                                            |
| 10598976     | 1.1       | 0.01              | 3.3       | 0.00              | 0.2       | 0.48              | TIMP1                    | TIMP metalloproteinase inhibitor 1                                           |
| 10379511     | 1.8       | 0.00              | 3.3       | 0.00              | -0.1      | 0.43              | Ccl2                     | chemokine (C-C motif) ligand 2                                               |
| 10574145     | 1.9       | 0.00              | 3.3       | 0.00              | 0.4       | 0.01              | NLRC5                    | NLR family, CARD domain containing 5                                         |
| 10379518     | 1.9       | 0.00              | 3.3       | 0.00              | -0.1      | 0.70              | CCL7                     | chemokine (C-C motif) ligand 7                                               |
| 10455957     | 2.1       | 0.00              | 3.3       | 0.00              | 0.5       | 0.06              |                          |                                                                              |
| 10450325     | 1.7       | 0.00              | 3.3       | 0.00              | 0.7       | 0.00              | CFB                      | complement factor B                                                          |
| 10496592     | 1.8       | 0.00              | 3.3       | 0.00              | 0.5       | 0.05              |                          |                                                                              |
| 10351509     | 1.1       | 0.00              | 3.2       | 0.00              | 0.6       | 0.01              | FCGR3A                   | Fc fragment of IgG, low affinity IIIa, receptor (CD16a)                      |
| 10531994     | 2.0       | 0.00              | 3.2       | 0.00              | 0.2       | 0.26              |                          |                                                                              |
| 10351873     | 2.3       | 0.00              | 3.2       | 0.00              | 0.2       | 0.09              | Ifi204 (includes others) | interferon activated gene 204                                                |
| 10531987     | 1.8       | 0.00              | 3.2       | 0.00              | 0.4       | 0.09              | Gbp6 (includes others)   | guanylate binding protein 6                                                  |
| 10420483     | 2.2       | 0.00              | 3.1       | 0.00              | 0.2       | 0.14              | Phf11a/Phf11b            | PHD finger protein 11A                                                       |
| 10444258     | 1.2       | 0.00              | 3.1       | 0.00              | 0.3       | 0.00              | PSMB8                    | proteasome (prosome, macropain) subunit, beta type, 8                        |
| 10593015     | 0.4       | 0.00              | 3.1       | 0.00              | 0.3       | 0.11              | CD3G                     | CD3g molecule, gamma (CD3-TCR complex)                                       |
| 10590635     | 1.1       | 0.00              | 3.1       | 0.00              | 0.5       | 0.03              | CCR5                     | chemokine (C-C motif) receptor 5 (gene/pseudogene)                           |
| 10598013     | 1.1       | 0.00              | 3.1       | 0.00              | 0.5       | 0.03              | CCR5                     | chemokine (C-C motif) receptor 5 (gene/pseudogene)                           |
| 10490150     | 1.7       | 0.00              | 3.1       | 0.00              | 0.2       | 0.07              | ZBP1                     | Z-DNA binding protein 1                                                      |
| 10398039     | 1.1       | 0.00              | 3.1       | 0.00              | 0.3       | 0.02              |                          |                                                                              |
| 10574149     | 1.8       | 0.00              | 3.1       | 0.00              | 0.5       | 0.00              | NLRC5                    | NLR family, CARD domain containing 5                                         |
| 10517165     | 1.0       | 0.00              | 3.0       | 0.00              | 1.0       | 0.00              | Cd52                     | CD52 antigen                                                                 |
| 10379636     | 1.8       | 0.00              | 3.0       | 0.00              | 0.0       | 0.80              | SLFN12L                  | schlafen family member 12-like                                               |
| 10496569     | 1.9       | 0.00              | 3.0       | 0.00              | 0.5       | 0.03              | GBP7                     | guanylate binding protein 7                                                  |
| 10346191     | 1.7       | 0.00              | 3.0       | 0.00              | 0.4       | 0.00              | STAT1                    | signal transducer and activator of transcription 1, 91kDa                    |
| 10375515     | 1.5       | 0.00              | 3.0       | 0.00              | 0.2       | 0.02              |                          |                                                                              |
| 10399710     | 3.0       | 0.00              | 2.9       | 0.00              | 0.3       | 0.13              | RSAD2                    | radical S-adenosyl methionine domain containing 2                            |
| 10502801     | 2.3       | 0.00              | 2.9       | 0.00              | 0.3       | 0.21              | IFI44L                   | interferon-induced protein 44-like                                           |
| 10461605     | 0.8       | 0.00              | 2.9       | 0.00              | 0.2       | 0.00              | Ms4a4b (includes others) | membrane-spanning 4-domains, subfamily A, member 4B                          |
| 10444244     | 1.4       | 0.00              | 2.8       | 0.00              | 0.3       | 0.01              | TAP1                     | transporter 1, ATP-binding cassette, sub-family B (MDR/TAP)                  |
| 10406928     | 1.0       | 0.00              | 2.8       | 0.00              | 0.9       | 0.01              | CD180                    | CD180 molecule                                                               |
| 10531980     | 1.4       | 0.00              | 2.8       | 0.00              | 0.4       | 0.03              | Gbp6 (includes others)   | guanylate binding protein 6                                                  |
| 10574135     | 1.4       | 0.00              | 2.8       | 0.00              | 0.4       | 0.03              | NLRC5                    | NLR family, CARD domain containing 5                                         |
| 10420488     | 2.3       | 0.00              | 2.8       | 0.00              | 0.2       | 0.44              | PHF11                    | PHD finger protein 11                                                        |
| 10531420     | 1.4       | 0.00              | 2.8       | 0.00              | 0.1       | 0.28              | Cxcl11                   | chemokine (C-X-C motif) ligand 11                                            |



|          |     |      |     |      |      |      |                 |                                                                                  |
|----------|-----|------|-----|------|------|------|-----------------|----------------------------------------------------------------------------------|
| 10538590 | 1.7 | 0.00 | 2.7 | 0.00 | 0.3  | 0.14 | HERC6           | HECT and RLD domain containing E3 ubiquitin protein ligase family member 6       |
| 10531972 | 1.0 | 0.00 | 2.7 | 0.00 | 0.2  | 0.18 | Gbp8            | guanylate-binding protein 8                                                      |
| 10574098 | 1.7 | 0.00 | 2.7 | 0.00 | 0.5  | 0.00 | NLRC5           | NLR family, CARD domain containing 5                                             |
| 10450075 | 1.7 | 0.00 | 2.7 | 0.00 | 0.7  | 0.00 | HLA-B           | major histocompatibility complex, class I, B                                     |
| 10512470 | 1.5 | 0.00 | 2.7 | 0.00 | 0.9  | 0.00 | CD72            | CD72 molecule                                                                    |
| 10444814 | 1.6 | 0.00 | 2.7 | 0.00 | 0.7  | 0.00 | HLA-B           | major histocompatibility complex, class I, B                                     |
| 10412211 | 1.3 | 0.00 | 2.7 | 0.00 | 0.0  | 0.64 | GZMA            | granzyme A (granzyme 1, cytotoxic T-lymphocyte-associated serine esterase 3)     |
| 10563597 | 1.6 | 0.00 | 2.7 | 0.00 | -0.2 | 0.23 | Saa3            | serum amyloid A 3                                                                |
| 10581378 | 1.0 | 0.00 | 2.7 | 0.00 | 0.2  | 0.01 | PSMB10          | proteasome (prosome, macropain) subunit, beta type, 10                           |
| 10389231 | 1.2 | 0.00 | 2.7 | 0.00 | 0.5  | 0.20 | CCL3L1/CCL3L3   | chemokine (C-C motif) ligand 3-like 1                                            |
| 10360173 | 1.1 | 0.00 | 2.7 | 0.00 | 0.5  | 0.01 | SLAMF7          | SLAM family member 7                                                             |
| 10450161 | 0.2 | 0.19 | 2.6 | 0.00 | 1.7  | 0.00 | HLA-DRA         | major histocompatibility complex, class II, DR alpha                             |
| 10434778 | 2.0 | 0.00 | 2.6 | 0.00 | 0.2  | 0.51 | RTP4            | receptor (chemosensory) transporter protein 4                                    |
| 10379633 | 1.4 | 0.00 | 2.6 | 0.00 | 0.0  | 0.98 | Sfn1            | schlafen 1                                                                       |
| 10496539 | 1.6 | 0.00 | 2.6 | 0.00 | 0.5  | 0.01 | GBP5            | guanylate binding protein 5                                                      |
| 10523717 | 0.4 | 0.03 | 2.6 | 0.00 | 2.0  | 0.00 | SPP1            | secreted phosphoprotein 1                                                        |
| 10590631 | 0.4 | 0.00 | 2.6 | 0.00 | 0.3  | 0.10 | CCR2            | chemokine (C-C motif) receptor 2                                                 |
| 10439249 | 1.5 | 0.00 | 2.6 | 0.00 | 0.3  | 0.06 | PARP14          | poly (ADP-ribose) polymerase family, member 14                                   |
| 10524621 | 1.9 | 0.00 | 2.6 | 0.00 | 0.2  | 0.23 | Oas12           | 2'-5' oligoadenylate synthetase-like 2                                           |
| 10574139 | 1.3 | 0.00 | 2.5 | 0.00 | 0.4  | 0.00 | NLRC5           | NLR family, CARD domain containing 5                                             |
| 10461721 | 0.7 | 0.00 | 2.5 | 0.00 | 1.1  | 0.00 | MPEG1           | macrophage expressed 1                                                           |
| 10513739 | 0.6 | 0.00 | 2.5 | 0.00 | 0.3  | 0.14 | TNC             | tenascin C                                                                       |
| 10456005 | 0.1 | 0.47 | 2.5 | 0.00 | 1.6  | 0.00 | CD74            | CD74 molecule, major histocompatibility complex, class II invariant chain        |
| 10444291 | 0.1 | 0.46 | 2.5 | 0.00 | 1.1  | 0.00 | HLA-DQB1        | major histocompatibility complex, class II, DQ beta 1                            |
| 10541564 | 0.7 | 0.00 | 2.5 | 0.00 | 0.3  | 0.07 | Clec4a3         | C-type lectin domain family 4, member a3                                         |
| 10574104 | 1.3 | 0.00 | 2.5 | 0.00 | 0.4  | 0.00 | NLRC5           | NLR family, CARD domain containing 5                                             |
| 10533246 | 1.7 | 0.00 | 2.5 | 0.00 | 0.3  | 0.20 | OAS1            | 2'-5'-oligoadenylate synthetase 1, 40/46kDa                                      |
| 10542164 | 0.5 | 0.00 | 2.5 | 0.00 | 1.1  | 0.00 | CLEC12A         | C-type lectin domain family 12, member A                                         |
| 10450694 | 1.3 | 0.00 | 2.5 | 0.00 | 0.6  | 0.00 | H2-T22          | histocompatibility 2, T region locus 22                                          |
| 10574157 | 1.3 | 0.00 | 2.4 | 0.00 | 0.2  | 0.06 | NLRC5           | NLR family, CARD domain containing 5                                             |
| 10450154 | 0.1 | 0.69 | 2.4 | 0.00 | 1.5  | 0.00 | HLA-DQA1        | major histocompatibility complex, class II, DQ alpha 1                           |
| 10450145 | 0.8 | 0.00 | 2.4 | 0.00 | 0.3  | 0.00 | PSMB9           | proteasome (prosome, macropain) subunit, beta type, 9                            |
| 10351880 | 2.1 | 0.00 | 2.4 | 0.00 | 0.2  | 0.24 | Pydc3/Pydc4     | pyrin domain containing 4                                                        |
| 10571984 | 1.8 | 0.00 | 2.4 | 0.00 | 0.4  | 0.05 | DDX60           | DEAD (Asp-Glu-Ala-Asp) box polypeptide 60                                        |
| 10608650 | 1.2 | 0.00 | 2.4 | 0.00 | 0.5  | 0.00 |                 |                                                                                  |
| 10393573 | 1.7 | 0.00 | 2.4 | 0.00 | 0.2  | 0.47 | LGALS3BP        | lectin, galactoside-binding, soluble, 3 binding protein                          |
| 10467136 | 1.0 | 0.00 | 2.3 | 0.00 | 0.1  | 0.56 | CH25H           | cholesterol 25-hydroxylase                                                       |
| 10378068 | 1.7 | 0.00 | 2.3 | 0.00 | 0.2  | 0.07 | XAF1            | XIAP associated factor 1                                                         |
| 10494271 | 0.9 | 0.00 | 2.3 | 0.00 | 1.0  | 0.01 | CTSS            | cathepsin S                                                                      |
| 10430344 | 0.8 | 0.00 | 2.3 | 0.00 | 0.3  | 0.00 | IL2RB           | interleukin 2 receptor, beta                                                     |
| 10574102 | 1.5 | 0.00 | 2.3 | 0.00 | 0.4  | 0.01 | NLRC5           | NLR family, CARD domain containing 5                                             |
| 10542214 | 0.9 | 0.00 | 2.3 | 0.00 | 0.3  | 0.01 | KLRD1           | killer cell lectin-like receptor subfamily D, member 1                           |
| 10548409 | 0.6 | 0.00 | 2.3 | 0.00 | 0.3  | 0.04 | KLRC1           | killer cell lectin-like receptor subfamily C, member 1                           |
| 10566366 | 1.7 | 0.00 | 2.3 | 0.00 | -0.1 | 0.80 | Trim30a/Trim30d | tripartite motif-containing 30A                                                  |
| 10545231 | 0.1 | 0.56 | 2.3 | 0.00 | 1.2  | 0.02 |                 |                                                                                  |
| 10398075 | 1.5 | 0.00 | 2.3 | 0.00 | 0.9  | 0.01 | SERPINA3        | serpin peptidase inhibitor, clade A (alpha-1 antitrypsin, antitrypsin), member 3 |
| 10450682 | 1.2 | 0.00 | 2.3 | 0.00 | 0.5  | 0.00 | HLA-E           | major histocompatibility complex, class I, E                                     |
| 10499899 | 0.3 | 0.02 | 2.3 | 0.00 | 0.4  | 0.00 | Spr1a           | small proline-rich protein 1A                                                    |
| 10566358 | 1.5 | 0.00 | 2.3 | 0.00 | 0.3  | 0.07 | Trim30a/Trim30d | tripartite motif-containing 30A                                                  |
| 10358408 | 0.5 | 0.00 | 2.3 | 0.00 | 1.1  | 0.00 | RGS1            | regulator of G-protein signaling 1                                               |
| 10500335 | 1.0 | 0.00 | 2.2 | 0.00 | 0.1  | 0.31 | FCGR1A          | Fc fragment of IgG, high affinity Ia, receptor (CD64)                            |
| 10358224 | 0.5 | 0.00 | 2.2 | 0.00 | 0.4  | 0.02 | PTPRC           | protein tyrosine phosphatase, receptor type, C                                   |
| 10376060 | 0.6 | 0.01 | 2.2 | 0.00 | 0.3  | 0.02 | IRF1            | interferon regulatory factor 1                                                   |
| 10441233 | 1.9 | 0.00 | 2.2 | 0.00 | 0.1  | 0.25 | Mx1/Mx2         | myxovirus (influenza virus) resistance 1                                         |

|          |      |      |     |      |      |      |                           |                                                                                                       |
|----------|------|------|-----|------|------|------|---------------------------|-------------------------------------------------------------------------------------------------------|
| 10437224 | 2.1  | 0.00 | 2.2 | 0.00 | 0.1  | 0.44 | Mx1/Mx2                   | myxovirus (influenza virus) resistance 1                                                              |
| 10360370 | 1.5  | 0.00 | 2.2 | 0.00 | 0.0  | 0.85 | Ifi204 (includes others)  | interferon activated gene 204                                                                         |
| 10482802 | 0.1  | 0.41 | 2.2 | 0.00 | 0.2  | 0.32 | CYTIP                     | cytohesin 1 interacting protein                                                                       |
| 10483110 | 1.4  | 0.00 | 2.1 | 0.00 | 0.2  | 0.12 | IFIH1                     | interferon induced with helicase C domain 1                                                           |
| 10391207 | 1.6  | 0.00 | 2.1 | 0.00 | 0.2  | 0.25 | DHX58                     | DEXH (Asp-Glu-X-His) box polypeptide 58                                                               |
| 10360398 | 1.7  | 0.00 | 2.1 | 0.00 | 0.1  | 0.34 | Ifi202b                   | interferon activated gene 202B                                                                        |
| 10469816 | 0.5  | 0.00 | 2.1 | 0.00 | 0.7  | 0.01 | IL1RN                     | interleukin 1 receptor antagonist                                                                     |
| 10586865 | 0.4  | 0.05 | 2.1 | 0.00 | 0.4  | 0.01 | ALDH1A2                   | aldehyde dehydrogenase 1 family, member A2                                                            |
| 10416437 | 0.7  | 0.00 | 2.1 | 0.00 | 0.5  | 0.03 | LCP1                      | lymphocyte cytosolic protein 1 (L-plastin)                                                            |
| 10522788 | 0.6  | 0.00 | 2.1 | 0.00 | 1.4  | 0.00 | STAP1                     | signal transducing adaptor family member 1                                                            |
| 10608680 | 1.1  | 0.00 | 2.1 | 0.00 | 0.5  | 0.00 | H2-T22                    | histocompatibility 2, T region locus 22                                                               |
| 10574137 | 0.8  | 0.00 | 2.0 | 0.00 | 0.1  | 0.05 | NLRC5                     | NLR family, CARD domain containing 5                                                                  |
| 10541555 | 0.7  | 0.00 | 2.0 | 0.00 | 0.2  | 0.10 | Clec4a1                   | C-type lectin domain family 4, member a1                                                              |
| 10439268 | 1.4  | 0.00 | 2.0 | 0.00 | 0.3  | 0.07 | DTX3L                     | deltex 3-like (Drosophila)                                                                            |
| 10383198 | 1.4  | 0.00 | 2.0 | 0.00 | 0.2  | 0.28 |                           |                                                                                                       |
| 10489107 | 0.9  | 0.00 | 2.0 | 0.00 | 0.2  | 0.11 | SAMHD1                    | SAM domain and HD domain 1                                                                            |
| 10547664 | 0.7  | 0.01 | 2.0 | 0.00 | -0.1 | 0.75 | CLEC4E                    | C-type lectin domain family 4, member E                                                               |
| 10473356 | 1.2  | 0.00 | 2.0 | 0.00 | 0.2  | 0.16 | UBE2L6                    | ubiquitin-conjugating enzyme E2L 6                                                                    |
| 10545672 | 1.1  | 0.00 | 2.0 | 0.00 | -0.2 | 0.02 | MTHFD2                    | methylenetetrahydrofolate dehydrogenase (NADP+ dependent) 2, methylenetetrahydrofolate cyclohydrolase |
| 10501063 | 0.9  | 0.00 | 2.0 | 0.00 | 0.6  | 0.03 | CD53                      | CD53 molecule                                                                                         |
| 10548333 | 0.5  | 0.02 | 2.0 | 0.00 | 0.1  | 0.18 | CD69                      | CD69 molecule                                                                                         |
| 10346168 | 0.3  | 0.02 | 2.0 | 0.00 | 0.3  | 0.00 | STAT4                     | signal transducer and activator of transcription 4                                                    |
| 10444229 | -0.1 | 0.50 | 2.0 | 0.00 | 0.5  | 0.00 | HLA-DMA                   | major histocompatibility complex, class II, DM alpha                                                  |
| 10383202 | 1.2  | 0.00 | 2.0 | 0.00 | 0.2  | 0.11 | Rnf213                    | ring finger protein 213                                                                               |
| 10383212 | 1.3  | 0.00 | 2.0 | 0.00 | 0.1  | 0.08 | Rnf213                    | ring finger protein 213                                                                               |
| 10427628 | 0.2  | 0.09 | 2.0 | 0.00 | 1.1  | 0.00 | IL7R                      | interleukin 7 receptor                                                                                |
| 10450699 | 1.2  | 0.00 | 2.0 | 0.00 | 0.5  | 0.00 | HLA-F                     | major histocompatibility complex, class I, F                                                          |
| 10383200 | 1.3  | 0.00 | 2.0 | 0.00 | 0.2  | 0.26 |                           |                                                                                                       |
| 10582997 | 1.1  | 0.00 | 2.0 | 0.00 | 0.3  | 0.09 | CASP4                     | caspase 4, apoptosis-related cysteine peptidase                                                       |
| 10363070 | 0.5  | 0.00 | 2.0 | 0.00 | 0.7  | 0.04 | Gp49a/Lilrb4              | leukocyte immunoglobulin-like receptor, subfamily B, member 4                                         |
| 10566050 | 0.9  | 0.00 | 2.0 | 0.00 | 0.1  | 0.08 | IL18BP                    | interleukin 18 binding protein                                                                        |
| 10387985 | 0.8  | 0.00 | 2.0 | 0.00 | 0.2  | 0.07 | SCIMP                     | SLP adaptor and CSK interacting membrane protein                                                      |
| 10379530 | 0.9  | 0.00 | 1.9 | 0.00 | 0.1  | 0.52 | CCL2                      | chemokine (C-C motif) ligand 2                                                                        |
| 10383204 | 1.1  | 0.00 | 1.9 | 0.00 | 0.2  | 0.12 | Rnf213                    | ring finger protein 213                                                                               |
| 10347928 | 1.2  | 0.00 | 1.9 | 0.00 | 0.3  | 0.13 | SP110                     | SP110 nuclear body protein                                                                            |
| 10582874 | 1.2  | 0.00 | 1.9 | 0.00 | 0.3  | 0.13 | SP110                     | SP110 nuclear body protein                                                                            |
| 10383168 | 1.2  | 0.00 | 1.9 | 0.00 | 0.2  | 0.04 |                           |                                                                                                       |
| 10439009 | 1.6  | 0.00 | 1.9 | 0.00 | 0.3  | 0.16 | APOD                      | apolipoprotein D                                                                                      |
| 10466210 | 1.3  | 0.00 | 1.9 | 0.00 | -0.2 | 0.25 | MS4A6A                    | membrane-spanning 4-domains, subfamily A, member 6A                                                   |
| 10383214 | 1.2  | 0.00 | 1.9 | 0.00 | 0.2  | 0.15 | Rnf213                    | ring finger protein 213                                                                               |
| 10590623 | 0.2  | 0.12 | 1.9 | 0.00 | 0.4  | 0.03 | CXCR6                     | chemokine (C-X-C motif) receptor 6                                                                    |
| 10444821 | 1.2  | 0.00 | 1.9 | 0.00 | 0.3  | 0.02 | H2-Q5                     | histocompatibility 2, Q region locus 5                                                                |
| 10516620 | 0.3  | 0.01 | 1.9 | 0.00 | 0.0  | 0.71 | LCK                       | lymphocyte-specific protein tyrosine kinase                                                           |
| 10576034 | 0.3  | 0.01 | 1.9 | 0.00 | 0.2  | 0.01 | IRF8                      | interferon regulatory factor 8                                                                        |
| 10543067 | 0.9  | 0.00 | 1.9 | 0.00 | -0.2 | 0.35 | ASNS                      | asparagine synthetase (glutamine-hydrolyzing)                                                         |
| 10385504 | 1.3  | 0.00 | 1.9 | 0.00 | 0.1  | 0.67 | Gm5431                    | predicted gene 5431                                                                                   |
| 10512067 | 1.5  | 0.00 | 1.9 | 0.00 | 0.2  | 0.27 | DDX58                     | DEAD (Asp-Glu-Ala-Asp) box polypeptide 58                                                             |
| 10371082 | 0.2  | 0.17 | 1.9 | 0.00 | -0.5 | 0.03 | NMRK2                     | nicotinamide riboside kinase 2                                                                        |
| 10346799 | 0.0  | 0.94 | 1.9 | 0.00 | 0.2  | 0.05 | ICOS                      | inducible T-cell co-stimulator                                                                        |
| 10375145 | 0.7  | 0.00 | 1.9 | 0.00 | 0.2  | 0.21 | LCP2                      | lymphocyte cytosolic protein 2 (SH2 domain containing leukocyte protein of 76kDa)                     |
| 10450675 | 1.3  | 0.00 | 1.9 | 0.00 | 0.3  | 0.06 | H2-T24                    | histocompatibility 2, T region locus 24                                                               |
| 10451287 | 1.2  | 0.00 | 1.9 | 0.00 | 0.1  | 0.54 |                           |                                                                                                       |
| 10383206 | 1.5  | 0.00 | 1.9 | 0.00 | 0.2  | 0.40 |                           |                                                                                                       |
| 10544133 | 1.2  | 0.00 | 1.9 | 0.00 | 0.2  | 0.10 | PARP12                    | poly (ADP-ribose) polymerase family, member 12                                                        |
| 10383208 | 1.3  | 0.00 | 1.9 | 0.00 | 0.1  | 0.52 |                           |                                                                                                       |
| 10587323 | 0.3  | 0.07 | 1.9 | 0.00 | 0.0  | 0.65 |                           |                                                                                                       |
| 10547621 | 0.7  | 0.00 | 1.9 | 0.00 | 0.6  | 0.06 | APOBEC1                   | apolipoprotein B mRNA editing enzyme, catalytic polypeptide 1                                         |
| 10578264 | 0.8  | 0.00 | 1.9 | 0.00 | 0.2  | 0.43 | MSR1                      | macrophage scavenger receptor 1                                                                       |
| 10497358 | 0.4  | 0.01 | 1.8 | 0.00 | 0.1  | 0.29 | Sirpb1a (includes others) | signal-regulatory protein beta 1A                                                                     |
| 10508392 | 0.6  | 0.00 | 1.8 | 0.00 | 0.1  | 0.47 | RNF19B                    | ring finger protein 19B                                                                               |

|          |     |      |     |      |      |      |               |                                                                                         |
|----------|-----|------|-----|------|------|------|---------------|-----------------------------------------------------------------------------------------|
| 10383196 | 1.2 | 0.00 | 1.8 | 0.00 | 0.1  | 0.40 | Rnf213        | ring finger protein 213                                                                 |
| 10404606 | 0.8 | 0.01 | 1.8 | 0.00 | 0.8  | 0.01 | LY86          | lymphocyte antigen 86                                                                   |
| 10416837 | 0.5 | 0.00 | 1.8 | 0.00 | 0.1  | 0.51 | Irg1          | immunoresponsive gene 1                                                                 |
| 10384458 | 0.5 | 0.02 | 1.8 | 0.00 | 0.6  | 0.04 | PLEK          | pleckstrin                                                                              |
| 10430174 | 0.9 | 0.00 | 1.8 | 0.00 | 0.0  | 0.72 | ApoI9a/ApoI9b | apolipoprotein L 9b                                                                     |
| 10422760 | 0.3 | 0.01 | 1.8 | 0.00 | 0.3  | 0.08 | FYB           | FYN binding protein                                                                     |
| 10444780 | 0.9 | 0.00 | 1.8 | 0.00 | 0.3  | 0.00 | HLA-B         | major histocompatibility complex, class I, B                                            |
| 10587683 | 0.2 | 0.03 | 1.8 | 0.00 | 0.5  | 0.02 | BCL2A1        | BCL2-related protein A1                                                                 |
| 10494978 | 0.5 | 0.01 | 1.8 | 0.00 | 0.1  | 0.37 | PTPN22        | protein tyrosine phosphatase, non-receptor type 22 (lymphoid)                           |
| 10548345 | 0.6 | 0.00 | 1.8 | 0.00 | 0.1  | 0.44 |               |                                                                                         |
| 10383152 | 1.2 | 0.00 | 1.8 | 0.00 | 0.2  | 0.18 | Rnf213        | ring finger protein 213                                                                 |
| 10466127 | 0.8 | 0.01 | 1.8 | 0.00 | 0.3  | 0.02 | AW112010      | expressed sequence AW112010                                                             |
| 10534909 | 1.0 | 0.00 | 1.8 | 0.00 | 0.3  | 0.02 | SP110         | SP110 nuclear body protein                                                              |
| 10566144 | 1.1 | 0.00 | 1.8 | 0.00 | 0.0  | 0.72 | TRIM21        | tripartite motif containing 21                                                          |
| 10547657 | 0.6 | 0.01 | 1.8 | 0.00 | 0.7  | 0.04 | C3AR1         | complement component 3a receptor 1                                                      |
| 10341146 | 1.0 | 0.07 | 1.8 | 0.00 | 0.3  | 0.23 |               |                                                                                         |
| 10398907 | 0.6 | 0.00 | 1.8 | 0.00 | 0.2  | 0.15 | PLD4          | phospholipase D family, member 4                                                        |
| 10364262 | 0.3 | 0.00 | 1.7 | 0.00 | 0.6  | 0.05 | ITGB2         | integrin, beta 2 (complement component 3 receptor 3 and 4 subunit)                      |
| 10383233 | 1.1 | 0.00 | 1.7 | 0.00 | 0.1  | 0.33 | Rnf213        | ring finger protein 213                                                                 |
| 10467578 | 0.6 | 0.00 | 1.7 | 0.00 | 0.3  | 0.00 | PIK3AP1       | phosphoinositide-3-kinase adaptor protein 1                                             |
| 10538979 | 0.0 | 0.62 | 1.7 | 0.00 | 0.1  | 0.22 | CD8B          | CD8b molecule                                                                           |
| 10351658 | 0.3 | 0.03 | 1.7 | 0.00 | 0.3  | 0.02 | CD48          | CD48 molecule                                                                           |
| 10583008 | 0.6 | 0.00 | 1.7 | 0.00 | 0.8  | 0.00 | CASP12        | caspase 12 (gene/pseudogene)                                                            |
| 10533213 | 1.0 | 0.00 | 1.7 | 0.00 | 0.0  | 0.84 | OAS3          | 2'-5'-oligoadenylate synthetase 3, 100kDa                                               |
| 10579532 | 1.0 | 0.00 | 1.7 | 0.00 | 0.0  | 0.89 | BST2          | bone marrow stromal cell antigen 2                                                      |
| 10601456 | 0.4 | 0.00 | 1.7 | 0.00 | 0.1  | 0.39 | Gm6377        | predicted gene 6377                                                                     |
| 10367224 | 1.1 | 0.00 | 1.7 | 0.00 | 0.1  | 0.48 | STAT2         | signal transducer and activator of transcription 2, 113kDa                              |
| 10473125 | 0.3 | 0.00 | 1.7 | 0.00 | 0.3  | 0.01 | ITGA4         | integrin, alpha 4 (antigen CD49D, alpha 4 subunit of VLA-4 receptor)                    |
| 10577655 | 0.7 | 0.00 | 1.7 | 0.00 | -0.1 | 0.46 | IDO1          | indoleamine 2,3-dioxygenase 1                                                           |
| 10587331 | 0.2 | 0.09 | 1.7 | 0.00 | 0.0  | 0.49 |               |                                                                                         |
| 10414360 | 0.2 | 0.02 | 1.7 | 0.00 | 1.3  | 0.00 | LGALS3        | lectin, galactoside-binding, soluble, 3                                                 |
| 10420030 | 0.5 | 0.00 | 1.7 | 0.00 | 0.1  | 0.17 | PSME2         | proteasome (prosome, macropain) activator subunit 2 (PA28 beta)                         |
| 10601385 | 0.8 | 0.00 | 1.7 | 0.00 | 0.5  | 0.05 | Tlr13         | toll-like receptor 13                                                                   |
| 10404429 | 0.5 | 0.01 | 1.7 | 0.00 | 0.3  | 0.21 | SERPINB9      | serpin peptidase inhibitor, clade B (ovalbumin), member 9                               |
| 10363082 | 0.7 | 0.00 | 1.7 | 0.00 | 0.7  | 0.03 | Gp49a/Lilrb4  | leukocyte immunoglobulin-like receptor, subfamily B, member 4                           |
| 10466314 | 1.1 | 0.00 | 1.7 | 0.00 | 0.0  | 0.67 |               |                                                                                         |
| 10581813 | 0.8 | 0.00 | 1.7 | 0.00 | -0.1 | 0.44 | MLKL          | mixed lineage kinase domain-like                                                        |
| 10532744 | 0.3 | 0.01 | 1.7 | 0.00 | 0.2  | 0.02 | SELPLG        | selectin P ligand                                                                       |
| 10372410 | 0.5 | 0.00 | 1.7 | 0.00 | 1.1  | 0.00 | GLIPR1        | GLI pathogenesis-related 1                                                              |
| 10397975 | 1.0 | 0.00 | 1.7 | 0.00 | 0.4  | 0.00 | IFI27         | interferon, alpha-inducible protein 27                                                  |
| 10452980 | 1.5 | 0.00 | 1.7 | 0.00 | 0.1  | 0.52 | EIF2AK2       | eukaryotic translation initiation factor 2-alpha kinase 2                               |
| 10385511 | 0.8 | 0.00 | 1.7 | 0.00 | 0.2  | 0.12 | Psme2b        | protease (prosome, macropain) activator subunit 2B                                      |
| 10554240 | 1.3 | 0.00 | 1.7 | 0.00 | 0.1  | 0.17 | ISG20         | interferon stimulated exonuclease gene 20kDa                                            |
| 10360070 | 1.0 | 0.00 | 1.7 | 0.00 | 0.5  | 0.01 | FCER1G        | Fc fragment of IgE, high affinity I, receptor for; gamma polypeptide                    |
| 10559486 | 0.3 | 0.04 | 1.7 | 0.00 | 0.6  | 0.01 | LAIR1         | leukocyte-associated immunoglobulin-like receptor 1                                     |
| 10402347 | 1.2 | 0.00 | 1.7 | 0.00 | -0.1 | 0.44 | IFI27L2       | interferon, alpha-inducible protein 27-like 2                                           |
| 10547976 | 0.4 | 0.03 | 1.7 | 0.00 | 0.2  | 0.16 | TAPBPL        | TAP binding protein-like                                                                |
| 10595633 | 0.3 | 0.00 | 1.7 | 0.00 | 0.5  | 0.01 | BCL2A1        | BCL2-related protein A1                                                                 |
| 10477250 | 0.6 | 0.00 | 1.7 | 0.00 | 0.2  | 0.27 | HCK           | hemopoietic cell kinase                                                                 |
| 10497372 | 0.1 | 0.25 | 1.6 | 0.00 | 0.1  | 0.61 | Gm5150        | predicted gene 5150                                                                     |
| 10360373 | 1.4 | 0.00 | 1.6 | 0.00 | 0.3  | 0.07 | Pydc3/Pydc4   | pyrin domain containing 4                                                               |
| 10341698 | 0.7 | 0.03 | 1.6 | 0.00 | -0.2 | 0.30 |               |                                                                                         |
| 10458314 | 0.3 | 0.11 | 1.6 | 0.00 | 0.2  | 0.22 | TMEM173       | transmembrane protein 173                                                               |
| 10388958 | 0.5 | 0.00 | 1.6 | 0.00 | 0.4  | 0.08 |               |                                                                                         |
| 10383210 | 1.1 | 0.00 | 1.6 | 0.00 | 0.0  | 0.92 | Rnf213        | ring finger protein 213                                                                 |
| 10603551 | 0.4 | 0.01 | 1.6 | 0.00 | 1.2  | 0.00 | CYBB          | cytochrome b-245, beta polypeptide                                                      |
| 10351197 | 0.6 | 0.01 | 1.6 | 0.00 | -0.2 | 0.37 | SELL          | selectin L                                                                              |
| 10430372 | 0.3 | 0.04 | 1.6 | 0.00 | 0.2  | 0.05 | RAC2          | ras-related C3 botulinum toxin substrate 2 (rho family, small GTP binding protein Rac2) |
| 10466200 | 0.4 | 0.00 | 1.6 | 0.00 | 0.6  | 0.01 | MS4A7         | membrane-spanning 4-domains, subfamily A, member 7                                      |
| 10424676 | 1.1 | 0.00 | 1.6 | 0.00 | 0.1  | 0.52 | LY6E          | lymphocyte antigen 6 complex, locus E                                                   |
| 10533198 | 1.3 | 0.00 | 1.6 | 0.00 | 0.3  | 0.11 | OAS2          | 2'-5'-oligoadenylate synthetase 2, 69/71kDa                                             |
| 10385118 | 0.4 | 0.00 | 1.6 | 0.00 | 0.4  | 0.01 | DOCK2         | dedicator of cytokinesis 2                                                              |
| 10446253 | 0.4 | 0.00 | 1.6 | 0.00 | 0.2  | 0.05 | VAV1          | vav 1 guanine nucleotide exchange factor                                                |
| 10525158 | 1.3 | 0.00 | 1.6 | 0.00 | 0.0  | 0.92 | Oas1b         | 2'-5' oligoadenylate synthetase 1B                                                      |
| 10574163 | 0.7 | 0.00 | 1.6 | 0.00 | 0.1  | 0.09 | NLRC5         | NLR family, CARD domain                                                                 |

|          |      |      |     |      |      |      |                          |                                                                                                       |
|----------|------|------|-----|------|------|------|--------------------------|-------------------------------------------------------------------------------------------------------|
| 10598004 | 0.1  | 0.63 | 1.6 | 0.00 | 0.2  | 0.15 | CCR1                     | containing 5                                                                                          |
| 10601416 | 0.1  | 0.53 | 1.6 | 0.00 | 0.1  | 0.20 | P2RY10                   | chemokine (C-C motif) receptor 1 purinergic receptor P2Y, G-protein coupled, 10                       |
| 10587690 | 0.3  | 0.00 | 1.6 | 0.00 | 0.4  | 0.01 | BCL2A1                   | BCL2-related protein A1                                                                               |
| 10516966 | 0.6  | 0.01 | 1.6 | 0.00 | 0.1  | 0.20 | THEMIS2                  | thymocyte selection associated family member 2                                                        |
| 10549647 | 0.7  | 0.00 | 1.6 | 0.00 | 0.3  | 0.02 | NCR1                     | natural cytotoxicity triggering receptor 1                                                            |
| 10356278 | 0.8  | 0.00 | 1.6 | 0.00 | 0.2  | 0.02 | SP110                    | SP110 nuclear body protein                                                                            |
| 10444830 | 0.9  | 0.00 | 1.6 | 0.00 | 0.4  | 0.00 | H2-K2/H2-Q9              | histocompatibility 2, K region locus 2                                                                |
| 10542140 | 0.5  | 0.01 | 1.6 | 0.00 | 0.2  | 0.19 | Klrb1f                   | killer cell lectin-like receptor subfamily B member 1F                                                |
| 10444298 | 0.0  | 0.66 | 1.6 | 0.00 | 0.8  | 0.00 | HLA-DRB1                 | major histocompatibility complex, class II, DR beta 1                                                 |
| 10544588 | -0.1 | 0.52 | 1.6 | 0.00 | 0.2  | 0.02 | GIMAP5                   | GTPase, IMAP family member 5                                                                          |
| 10389134 | 0.7  | 0.01 | 1.6 | 0.00 | 0.2  | 0.07 | SLFN13                   | schlafen family member 13                                                                             |
| 10557862 | 0.3  | 0.01 | 1.5 | 0.00 | 0.2  | 0.28 | ITGAM                    | integrin, alpha M (complement component 3 receptor 3 subunit)                                         |
| 10461622 | 0.7  | 0.00 | 1.5 | 0.00 | -0.2 | 0.34 | Ms4a6b                   | membrane-spanning 4-domains, subfamily A, member 6B                                                   |
| 10381408 | 0.8  | 0.00 | 1.5 | 0.00 | 0.1  | 0.31 | IFI35                    | interferon-induced protein 35                                                                         |
| 10574151 | 0.7  | 0.00 | 1.5 | 0.00 | 0.0  | 0.86 | NLRC5                    | NLR family, CARD domain containing 5                                                                  |
| 10344031 | 0.6  | 0.01 | 1.5 | 0.00 | 0.4  | 0.15 |                          |                                                                                                       |
| 10383194 | 1.1  | 0.01 | 1.5 | 0.00 | 0.1  | 0.70 | Rnf213                   | ring finger protein 213                                                                               |
| 10539135 | 0.4  | 0.01 | 1.5 | 0.00 | 0.5  | 0.04 | CAPG                     | capping protein (actin filament), gelsolin-like                                                       |
| 10379630 | 0.9  | 0.00 | 1.5 | 0.00 | 0.2  | 0.05 | Slnf2                    | schlafen 2                                                                                            |
| 10343267 | 0.4  | 0.13 | 1.5 | 0.00 | 0.4  | 0.15 |                          |                                                                                                       |
| 10460767 | 0.5  | 0.01 | 1.5 | 0.00 | 0.1  | 0.31 | BATF2                    | basic leucine zipper transcription factor, ATF-like 2                                                 |
| 10495186 | 0.4  | 0.00 | 1.5 | 0.00 | 0.3  | 0.02 | A1504432                 | expressed sequence A1504432                                                                           |
| 10383192 | 1.0  | 0.00 | 1.5 | 0.00 | -0.1 | 0.56 |                          |                                                                                                       |
| 10473809 | 0.7  | 0.00 | 1.5 | 0.00 | 0.4  | 0.08 | SPI1                     | spleen focus forming virus (SFFV) proviral integration oncogene                                       |
| 10343969 | 0.8  | 0.04 | 1.5 | 0.00 | 0.0  | 0.92 |                          |                                                                                                       |
| 10444268 | 0.6  | 0.00 | 1.5 | 0.00 | 0.2  | 0.00 | TAP2                     | transporter 2, ATP-binding cassette, sub-family B (MDR/TAP)                                           |
| 10578493 | 1.1  | 0.00 | 1.5 | 0.00 | 0.1  | 0.39 | TLR3                     | toll-like receptor 3                                                                                  |
| 10559467 | 0.3  | 0.02 | 1.5 | 0.00 | 0.4  | 0.06 |                          |                                                                                                       |
| 10360382 | 1.1  | 0.00 | 1.5 | 0.00 | -0.1 | 0.38 | Ifi204 (includes others) | interferon activated gene 204                                                                         |
| 10557591 | 0.3  | 0.02 | 1.5 | 0.00 | 0.1  | 0.24 | ITGAL                    | integrin, alpha L (antigen CD11A (p180), lymphocyte function-associated antigen 1; alpha polypeptide) |
| 10566583 | 0.8  | 0.00 | 1.5 | 0.00 | 0.2  | 0.16 | Gm8995                   | predicted gene 8995                                                                                   |
| 10351691 | 0.2  | 0.02 | 1.5 | 0.00 | 0.1  | 0.15 | SLAMF6                   | SLAM family member 6                                                                                  |
| 10342250 | 0.6  | 0.05 | 1.5 | 0.00 | -0.2 | 0.67 |                          |                                                                                                       |
| 10524631 | 1.6  | 0.00 | 1.5 | 0.00 | 0.0  | 0.92 | OASL                     | 2'-5'-oligoadenylate synthetase-like                                                                  |
| 10508663 | 0.3  | 0.05 | 1.5 | 0.00 | 0.5  | 0.02 | LAPTM5                   | lysosomal protein transmembrane 5                                                                     |
| 10352000 | 0.2  | 0.14 | 1.5 | 0.00 | 0.2  | 0.17 | KMO                      | kynurenine 3-monooxygenase (kynurenine 3-hydroxylase)                                                 |
| 10395039 | 1.9  | 0.00 | 1.5 | 0.00 | 0.2  | 0.25 | CMPK2                    | cytidine monophosphate (UMP-CMP) kinase 2, mitochondrial                                              |
| 10385513 | 0.8  | 0.00 | 1.5 | 0.00 | 0.2  | 0.15 | 9930111J21Rik2           | RIKEN cDNA 9930111J21 gene 2                                                                          |
| 10425049 | 0.9  | 0.00 | 1.5 | 0.00 | 0.0  | 0.97 | Apo9a/Apo9b              | apolipoprotein L 9b                                                                                   |
| 10339750 | 0.7  | 0.00 | 1.5 | 0.00 | 0.0  | 0.84 |                          |                                                                                                       |
| 10534927 | 0.6  | 0.01 | 1.5 | 0.00 | 0.3  | 0.03 | PILRA                    | paired immunoglobulin-like type 2 receptor alpha                                                      |
| 10491091 | 1.0  | 0.01 | 1.5 | 0.00 | 0.5  | 0.06 | TNFSF10                  | tumor necrosis factor (ligand) superfamily, member 10                                                 |
| 10343290 | 0.6  | 0.11 | 1.5 | 0.01 | -0.1 | 0.85 |                          |                                                                                                       |
| 10531737 | 0.3  | 0.03 | 1.5 | 0.00 | 0.4  | 0.00 | HPSE                     | heparanase                                                                                            |
| 10392839 | 0.5  | 0.00 | 1.4 | 0.00 | 0.1  | 0.04 | CD300E                   | CD300e molecule                                                                                       |
| 10606016 | 0.4  | 0.01 | 1.4 | 0.00 | 0.1  | 0.75 | IL2RG                    | interleukin 2 receptor, gamma                                                                         |
| 10341587 | 0.7  | 0.02 | 1.4 | 0.00 | 0.3  | 0.21 |                          |                                                                                                       |
| 10588479 | 0.4  | 0.01 | 1.4 | 0.00 | 0.2  | 0.04 | TLR9                     | toll-like receptor 9                                                                                  |
| 10459772 | 0.4  | 0.04 | 1.4 | 0.00 | 0.0  | 0.66 | LIPG                     | lipase, endothelial                                                                                   |
| 10427336 | 0.1  | 0.27 | 1.4 | 0.00 | 0.5  | 0.01 | NCKAP1L                  | NCK-associated protein 1-like                                                                         |
| 10429128 | 0.3  | 0.06 | 1.4 | 0.00 | 0.2  | 0.22 | SLA                      | Src-like-adaptor                                                                                      |
| 10385526 | 0.8  | 0.00 | 1.4 | 0.00 | 0.2  | 0.13 |                          |                                                                                                       |
| 10444236 | 0.0  | 0.56 | 1.4 | 0.00 | 0.4  | 0.00 | HLA-DMB                  | major histocompatibility complex, class II, DM beta                                                   |
| 10404061 | 0.2  | 0.05 | 1.4 | 0.00 | 0.1  | 0.65 | HIST1H2BB                | histone cluster 1, H2bb                                                                               |
| 10593024 | 0.0  | 0.92 | 1.4 | 0.00 | 0.0  | 0.60 | CD3E                     | CD3e molecule, epsilon (CD3-TCR complex)                                                              |
| 10435457 | 0.9  | 0.00 | 1.4 | 0.00 | 0.2  | 0.08 | PARP9                    | poly (ADP-ribose) polymerase family, member 9                                                         |
| 10347925 | 1.1  | 0.00 | 1.4 | 0.00 | 0.6  | 0.02 | Csprs (includes others)  | component of Sp100-rs                                                                                 |
| 10343468 | 0.7  | 0.02 | 1.4 | 0.00 | 0.1  | 0.40 |                          |                                                                                                       |
| 10487208 | 0.5  | 0.00 | 1.4 | 0.00 | 0.3  | 0.05 | ATP8B4                   | ATPase, class I, type 8B, member 4                                                                    |
| 10446282 | 0.5  | 0.01 | 1.4 | 0.00 | 0.4  | 0.04 | EMR1                     | egf-like module containing, mucin-like, hormone receptor-like 1                                       |
| 10347915 | 1.1  | 0.00 | 1.4 | 0.00 | 0.5  | 0.02 | Csprs (includes others)  | component of Sp100-rs                                                                                 |
| 10588786 | 0.6  | 0.00 | 1.4 | 0.00 | 0.1  | 0.00 |                          |                                                                                                       |
| 10432640 | 0.3  | 0.02 | 1.4 | 0.00 | 0.0  | 0.99 |                          |                                                                                                       |
| 10461614 | 1.0  | 0.00 | 1.4 | 0.00 | -0.2 | 0.22 | Ms4a6c                   | membrane-spanning 4-domains,                                                                          |

|          |      |      |     |      |      |      |                            |                                                                                          |
|----------|------|------|-----|------|------|------|----------------------------|------------------------------------------------------------------------------------------|
| 10338492 | 0.5  | 0.00 | 1.4 | 0.00 | 0.1  | 0.68 |                            | subfamily A, member 6C                                                                   |
| 10466190 | 0.1  | 0.40 | 1.4 | 0.00 | 0.3  | 0.14 | MS4A14                     | membrane-spanning 4-domains, subfamily A, member 14                                      |
| 10533256 | 0.9  | 0.00 | 1.4 | 0.00 | -0.1 | 0.61 | OAS1                       | 2'-5'-oligoadenylate synthetase 1, 40/46kDa                                              |
| 10574133 | 0.5  | 0.01 | 1.4 | 0.00 | 0.2  | 0.07 | NLRC5                      | NLR family, CARD domain containing 5                                                     |
| 10425092 | 0.1  | 0.41 | 1.4 | 0.00 | 0.4  | 0.03 | CYTH4                      | cytohesin 4                                                                              |
| 10397645 | 0.4  | 0.02 | 1.4 | 0.00 | 0.3  | 0.07 | GPR65                      | G protein-coupled receptor 65                                                            |
| 10407327 | -0.2 | 0.33 | 1.4 | 0.00 | 0.2  | 0.30 | EMB                        | embigin                                                                                  |
| 10416566 | 0.7  | 0.00 | 1.4 | 0.00 | 0.1  | 0.30 | Eps11                      | epithelial stromal interaction 1 (breast)                                                |
| 10415319 | 1.2  | 0.00 | 1.4 | 0.00 | 0.2  | 0.15 | IRF9                       | interferon regulatory factor 9                                                           |
| 10340317 | 0.5  | 0.03 | 1.4 | 0.00 | 0.0  | 0.84 |                            |                                                                                          |
| 10363475 | 0.5  | 0.01 | 1.4 | 0.00 | -0.1 | 0.28 | PRF1                       | perforin 1 (pore forming protein)                                                        |
| 10541587 | 0.3  | 0.08 | 1.4 | 0.00 | 0.3  | 0.12 | CLEC4A                     | C-type lectin domain family 4, member A                                                  |
| 10486061 | 0.3  | 0.01 | 1.4 | 0.00 | 0.1  | 0.33 | RASGRP1                    | RAS guanyl releasing protein 1 (calcium and DAG-regulated)                               |
| 10494405 | 0.0  | 0.86 | 1.4 | 0.00 | 0.3  | 0.09 |                            |                                                                                          |
| 10342553 | 0.6  | 0.02 | 1.4 | 0.00 | -0.1 | 0.48 |                            |                                                                                          |
| 10566578 | 1.0  | 0.00 | 1.4 | 0.00 | 0.2  | 0.19 | Gm8979                     | very large inducible GTPase 1 pseudogene                                                 |
| 10339951 | 0.4  | 0.12 | 1.4 | 0.00 | 0.1  | 0.65 |                            |                                                                                          |
| 10408239 | 0.0  | 0.90 | 1.3 | 0.00 | 0.3  | 0.08 | HIST2H3C (includes others) | histone cluster 2, H3c                                                                   |
| 10404065 | 0.0  | 0.86 | 1.3 | 0.00 | 0.3  | 0.08 |                            |                                                                                          |
| 10341222 | 0.4  | 0.01 | 1.3 | 0.00 | 0.2  | 0.27 |                            |                                                                                          |
| 10404049 | 0.0  | 0.78 | 1.3 | 0.00 | 0.3  | 0.09 |                            |                                                                                          |
| 10559446 | 0.1  | 0.35 | 1.3 | 0.00 | 0.1  | 0.38 | LILRB3                     | leukocyte immunoglobulin-like receptor, subfamily B (with TM and ITIM domains), member 3 |
| 10404028 | 0.0  | 0.86 | 1.3 | 0.00 | 0.3  | 0.08 |                            |                                                                                          |
| 10568024 | 0.1  | 0.07 | 1.3 | 0.00 | 0.1  | 0.48 | CORO1A                     | coronin, actin binding protein, 1A                                                       |
| 10412218 | 0.2  | 0.07 | 1.3 | 0.00 | 0.1  | 0.38 | GZMK                       | granzyme K (granzyme 3; tryptase II)                                                     |
| 10338116 | 0.5  | 0.01 | 1.3 | 0.00 | 0.1  | 0.25 |                            |                                                                                          |
| 10341395 | 0.6  | 0.01 | 1.3 | 0.00 | 0.1  | 0.25 |                            |                                                                                          |
| 10353844 | 0.2  | 0.05 | 1.3 | 0.00 | 0.3  | 0.00 | Neur3                      | neutralized homolog 3 homolog (Drosophila)                                               |
| 10566571 | 1.0  | 0.00 | 1.3 | 0.00 | 0.2  | 0.17 |                            |                                                                                          |
| 10551883 | 0.4  | 0.02 | 1.3 | 0.00 | 0.7  | 0.01 | TYROBP                     | TYRO protein tyrosine kinase binding protein                                             |
| 10362350 | -0.1 | 0.59 | 1.3 | 0.00 | 0.1  | 0.60 | THEMIS                     | thymocyte selection associated                                                           |
| 10374333 | 0.3  | 0.00 | 1.3 | 0.00 | 0.1  | 0.19 | IKZF1                      | IKAROS family zinc finger 1 (Ikaros)                                                     |
| 10574159 | 0.7  | 0.00 | 1.3 | 0.00 | 0.1  | 0.07 | NLRC5                      | NLR family, CARD domain containing 5                                                     |
| 10408246 | 0.0  | 0.89 | 1.3 | 0.00 | 0.2  | 0.09 |                            |                                                                                          |
| 10498345 | 0.1  | 0.38 | 1.3 | 0.00 | 0.0  | 0.92 | GPR171                     | G protein-coupled receptor 171                                                           |
| 10403941 | 0.0  | 0.71 | 1.3 | 0.00 | 0.3  | 0.09 |                            |                                                                                          |
| 10439527 | 0.3  | 0.01 | 1.3 | 0.00 | 0.1  | 0.40 | TIGIT                      | T cell immunoreceptor with Ig and ITIM domains                                           |
| 10408083 | 0.0  | 0.94 | 1.3 | 0.00 | 0.3  | 0.09 |                            |                                                                                          |
| 10359181 | 1.2  | 0.00 | 1.3 | 0.00 | 0.3  | 0.03 | TOR3A                      | torsin family 3, member A                                                                |
| 10541683 | 0.6  | 0.02 | 1.3 | 0.00 | 0.6  | 0.01 |                            |                                                                                          |
| 10465059 | 0.4  | 0.00 | 1.3 | 0.00 | 0.1  | 0.45 | CTSW                       | cathepsin W                                                                              |
| 10494402 | 0.0  | 0.87 | 1.3 | 0.00 | 0.3  | 0.06 |                            |                                                                                          |
| 10443980 | 0.1  | 0.40 | 1.3 | 0.00 | 0.3  | 0.11 | MYO1F                      | myosin IF                                                                                |
| 10461636 | 0.9  | 0.00 | 1.3 | 0.00 | -0.2 | 0.24 |                            |                                                                                          |
| 10439312 | 0.4  | 0.00 | 1.3 | 0.00 | 0.2  | 0.08 | CD86                       | CD86 molecule                                                                            |
| 10476945 | 0.1  | 0.39 | 1.3 | 0.00 | 0.0  | 0.88 | CST7                       | cystatin F (leukocystatin)                                                               |
| 10564539 | 0.2  | 0.06 | 1.3 | 0.00 | -0.2 | 0.10 | MCTP2                      | multiple C2 domains, transmembrane 2                                                     |
| 10429843 | 0.7  | 0.00 | 1.3 | 0.00 | 0.2  | 0.01 | PARP10                     | poly (ADP-ribose) polymerase family, member 10                                           |
| 10341905 | 0.4  | 0.14 | 1.3 | 0.00 | 0.1  | 0.61 |                            |                                                                                          |
| 10424400 | 0.4  | 0.01 | 1.3 | 0.00 | 0.1  | 0.56 | MYC                        | v-myc avian myelocytomatosis viral oncogene homolog                                      |
| 10538187 | -0.1 | 0.47 | 1.3 | 0.00 | 3.2  | 0.00 | GPNUMB                     | glycoprotein (transmembrane) nmb                                                         |
| 10444068 | 0.4  | 0.00 | 1.3 | 0.00 | 0.2  | 0.03 | TAPBP                      | TAP binding protein (tapasin)                                                            |
| 10351679 | 0.1  | 0.40 | 1.3 | 0.00 | 0.8  | 0.02 | CD84                       | CD84 molecule                                                                            |
| 10557895 | 0.1  | 0.60 | 1.3 | 0.00 | 1.3  | 0.01 | ITGAX                      | integrin, alpha X (complement component 3 receptor 4 subunit)                            |
| 10530145 | 0.3  | 0.07 | 1.3 | 0.00 | 0.2  | 0.23 | TLR1                       | toll-like receptor 1                                                                     |
| 10408202 | 0.0  | 0.74 | 1.3 | 0.00 | 0.2  | 0.08 | HIST2H3C (includes others) | histone cluster 2, H3c                                                                   |
| 10593050 | 0.3  | 0.02 | 1.3 | 0.00 | 0.2  | 0.00 | IL10RA                     | interleukin 10 receptor, alpha                                                           |
| 10482517 | 0.5  | 0.01 | 1.3 | 0.00 | 0.2  | 0.12 | NMI                        | N-myc (and STAT) interactor                                                              |
| 10340164 | 1.0  | 0.01 | 1.3 | 0.00 | 0.1  | 0.72 |                            |                                                                                          |
| 10441003 | 0.2  | 0.05 | 1.3 | 0.00 | 0.4  | 0.03 | RUNX1                      | runt-related transcription factor 1                                                      |
| 10344300 | 0.5  | 0.23 | 1.3 | 0.01 | 0.3  | 0.01 |                            |                                                                                          |
| 10356262 | 0.8  | 0.01 | 1.3 | 0.00 | 0.4  | 0.09 | Csprs (includes others)    | component of Sp100-rs                                                                    |
| 10338280 | 0.8  | 0.01 | 1.3 | 0.00 | 0.2  | 0.51 |                            |                                                                                          |
| 10581434 | 0.4  | 0.01 | 1.3 | 0.00 | 0.6  | 0.02 | DPEP2                      | dipeptidase 2                                                                            |
| 10568714 | -0.1 | 0.48 | 1.3 | 0.00 | 0.1  | 0.09 | MKI67                      | antigen identified by monoclonal antibody Ki-67                                          |

|          |      |      |     |      |      |      |                           |                                                                                   |
|----------|------|------|-----|------|------|------|---------------------------|-----------------------------------------------------------------------------------|
| 10450484 | 0.3  | 0.03 | 1.3 | 0.00 | 0.3  | 0.04 | AIF1                      | allograft inflammatory factor 1                                                   |
| 10583669 | 0.2  | 0.08 | 1.3 | 0.00 | 0.2  | 0.01 | C19orf38                  | chromosome 19 open reading frame 38                                               |
| 10521667 | 0.3  | 0.01 | 1.3 | 0.00 | 0.3  | 0.11 | BST1                      | bone marrow stromal cell antigen 1                                                |
| 10452316 | 0.2  | 0.08 | 1.3 | 0.00 | 0.5  | 0.01 | C3                        | complement component 3                                                            |
| 10580754 | 0.5  | 0.01 | 1.3 | 0.00 | 0.1  | 0.68 | 9330175E14Rik             | RIKEN cDNA 9330175E14 gene                                                        |
| 10542040 | 0.5  | 0.01 | 1.2 | 0.00 | 0.2  | 0.03 | PARP11                    | poly (ADP-ribose) polymerase family, member 11                                    |
| 10420497 | 0.9  | 0.01 | 1.2 | 0.00 | -0.3 | 0.08 | Phf11c                    | PHD finger protein 11C                                                            |
| 10566346 | 0.9  | 0.00 | 1.2 | 0.00 | 0.2  | 0.25 | TRIM5                     | tripartite motif containing 5                                                     |
| 10347948 | 0.8  | 0.00 | 1.2 | 0.00 | 0.3  | 0.06 | Sp100                     | nuclear antigen Sp100                                                             |
| 10548552 | 0.2  | 0.22 | 1.2 | 0.00 | 0.0  | 0.66 | Klra2                     | killer cell lectin-like receptor, subfamily A, member 2                           |
| 10339327 | 0.8  | 0.02 | 1.2 | 0.00 | 0.3  | 0.42 |                           |                                                                                   |
| 10429560 | 0.5  | 0.00 | 1.2 | 0.00 | -0.2 | 0.20 | Ly6a (includes others)    | lymphocyte antigen 6 complex, locus A                                             |
| 10461765 | 0.5  | 0.00 | 1.2 | 0.00 | 0.1  | 0.25 | LPXN                      | leupaxin                                                                          |
| 10366586 | 0.3  | 0.02 | 1.2 | 0.00 | 0.0  | 0.73 | IFNG                      | interferon, gamma                                                                 |
| 10589884 | 0.7  | 0.00 | 1.2 | 0.00 | 0.2  | 0.25 | Bcl2a1c                   | B cell leukemia/lymphoma 2 related protein A1c                                    |
| 10520452 | 0.3  | 0.08 | 1.2 | 0.00 | 0.0  | 0.88 | IL6                       | interleukin 6 (interferon, beta 2)                                                |
| 10574143 | 0.4  | 0.07 | 1.2 | 0.00 | 0.1  | 0.36 | NLRC5                     | NLR family, CARD domain containing 5                                              |
| 10457168 | -0.2 | 0.57 | 1.2 | 0.00 | 0.2  | 0.16 | CD226                     | CD226 molecule                                                                    |
| 10542911 | 0.9  | 0.00 | 1.2 | 0.00 | 0.2  | 0.12 | SAMD9L                    | sterile alpha motif domain containing 9-like                                      |
| 10359851 | 0.5  | 0.01 | 1.2 | 0.00 | -0.5 | 0.00 | UCK2                      | uridine-cytidine kinase 2                                                         |
| 10403871 | 0.4  | 0.00 | 1.2 | 0.00 | 0.3  | 0.01 | AOAH                      | acyloxyacyl hydrolase (neutrophil)                                                |
| 10381445 | 0.5  | 0.00 | 1.2 | 0.00 | 0.2  | 0.03 | TMEM106A                  | transmembrane protein 106A                                                        |
| 10548535 | 0.5  | 0.00 | 1.2 | 0.00 | 0.0  | 0.82 | Klra4 (includes others)   | killer cell lectin-like receptor, subfamily A, member 4                           |
| 10338178 | 1.0  | 0.00 | 1.2 | 0.00 | 0.2  | 0.61 |                           |                                                                                   |
| 10339765 | 0.8  | 0.02 | 1.2 | 0.00 | 0.1  | 0.62 |                           |                                                                                   |
| 10450344 | 0.3  | 0.07 | 1.2 | 0.00 | 0.0  | 0.70 | C2                        | complement component 2                                                            |
| 10388902 | 1.0  | 0.00 | 1.2 | 0.00 | 0.1  | 0.24 | LGALS9                    | lectin, galactoside-binding, soluble, 9                                           |
| 10497364 | 0.2  | 0.03 | 1.2 | 0.00 | 0.0  | 0.58 | Sirpb1a (includes others) | signal-regulatory protein beta 1A                                                 |
| 10440393 | 0.3  | 0.03 | 1.2 | 0.00 | 0.0  | 0.51 | SAMSN1                    | SAM domain, SH3 domain and nuclear localization signals 1                         |
| 10487823 | 0.7  | 0.00 | 1.2 | 0.00 | 0.2  | 0.07 | SIGLEC1                   | sialic acid binding Ig-like lectin 1, sialoadhesin                                |
| 10461558 | 0.3  | 0.02 | 1.2 | 0.00 | 0.2  | 0.11 | SLC15A3                   | solute carrier family 15 (oligopeptide transporter), member 3                     |
| 10582985 | 0.4  | 0.00 | 1.2 | 0.00 | 0.3  | 0.05 | CASP1                     | caspase 1, apoptosis-related cysteine peptidase                                   |
| 10402585 | 0.6  | 0.00 | 1.2 | 0.00 | 0.1  | 0.58 | WARS                      | tryptophanyl-tRNA synthetase                                                      |
| 10387536 | 0.1  | 0.19 | 1.2 | 0.00 | 0.7  | 0.02 | CD68                      | CD68 molecule                                                                     |
| 10343192 | 0.7  | 0.01 | 1.2 | 0.02 | 0.2  | 0.49 |                           |                                                                                   |
| 10342761 | 0.8  | 0.01 | 1.2 | 0.00 | 0.1  | 0.77 |                           |                                                                                   |
| 10342539 | 1.0  | 0.07 | 1.2 | 0.02 | -0.2 | 0.68 |                           |                                                                                   |
| 10408077 | 0.1  | 0.47 | 1.2 | 0.00 | 0.2  | 0.35 | HIST1H2AD                 | histone cluster 1, H2ad                                                           |
| 10435920 | 0.4  | 0.03 | 1.2 | 0.00 | 0.3  | 0.14 | CD200R1L                  | CD200 receptor 1-like                                                             |
| 10338367 | 0.5  | 0.01 | 1.2 | 0.00 | 0.0  | 0.79 |                           |                                                                                   |
| 10390707 | -0.1 | 0.15 | 1.2 | 0.00 | 0.2  | 0.12 | TOP2A                     | topoisomerase (DNA) II alpha 170kDa                                               |
| 10519951 | 0.0  | 0.88 | 1.2 | 0.00 | 0.3  | 0.01 | GSAP                      | gamma-secretase activating protein                                                |
| 10414548 | 0.1  | 0.43 | 1.2 | 0.00 | 0.1  | 0.46 | RNASE6                    | ribonuclease, RNase A family, k6                                                  |
| 10406205 | 0.3  | 0.00 | 1.2 | 0.00 | 0.1  | 0.45 | ERAP1                     | endoplasmic reticulum aminopeptidase 1                                            |
| 10430302 | 0.2  | 0.00 | 1.2 | 0.00 | 0.3  | 0.11 | CSF2RB                    | colony stimulating factor 2 receptor, beta, low-affinity (granulocyte-macrophage) |
| 10466130 | 0.5  | 0.00 | 1.2 | 0.00 | 0.0  | 0.91 | MS4A8                     | membrane-spanning 4-domains, subfamily A, member 8                                |
| 10415015 | 0.0  | 0.71 | 1.2 | 0.00 | -0.1 | 0.53 | Trav7-4                   | T cell receptor alpha variable 7-4                                                |
| 10339254 | 0.6  | 0.08 | 1.2 | 0.01 | 0.4  | 0.26 |                           |                                                                                   |
| 10375443 | 0.4  | 0.01 | 1.2 | 0.01 | 0.1  | 0.37 | HAVCR2                    | hepatitis A virus cellular receptor 2                                             |
| 10545135 | 0.4  | 0.00 | 1.2 | 0.00 | 0.0  | 0.78 | IL12RB2                   | interleukin 12 receptor, beta 2                                                   |
| 10398052 | 0.4  | 0.00 | 1.2 | 0.00 | 0.1  | 0.26 | Serpina3h                 | serine (or cysteine) peptidase inhibitor, clade A, member 3H                      |
| 10582879 | 0.9  | 0.00 | 1.2 | 0.00 | 0.6  | 0.00 | Csprs (includes others)   | component of Sp100-rs                                                             |
| 10356020 | -0.1 | 0.32 | 1.2 | 0.00 | 0.4  | 0.02 | DOCK10                    | dedicator of cytokinesis 10                                                       |
| 10501608 | 0.3  | 0.00 | 1.2 | 0.00 | 0.3  | 0.05 | VCAM1                     | vascular cell adhesion molecule 1                                                 |
| 10449303 | 0.2  | 0.07 | 1.2 | 0.00 | 0.0  | 0.59 | BAK1                      | BCL2-antagonist/killer 1                                                          |
| 10387890 | 0.1  | 0.24 | 1.2 | 0.00 | 0.4  | 0.03 | CXCL16                    | chemokine (C-X-C motif) ligand 16                                                 |
| 10606058 | 0.0  | 0.81 | 1.2 | 0.00 | 0.0  | 0.91 | CXCR3                     | chemokine (C-X-C motif) receptor 3                                                |
| 10384154 | 0.3  | 0.00 | 1.1 | 0.00 | 0.2  | 0.04 | MYO1G                     | myosin IG                                                                         |
| 10390640 | 0.2  | 0.02 | 1.1 | 0.00 | -0.1 | 0.19 | IKZF3                     | IKAROS family zinc finger 3 (Aiolos)                                              |
| 10339726 | 0.8  | 0.00 | 1.1 | 0.00 | 0.0  | 1.00 |                           |                                                                                   |
| 10342216 | 0.5  | 0.00 | 1.1 | 0.00 | 0.3  | 0.10 |                           |                                                                                   |
| 10485405 | 0.2  | 0.03 | 1.1 | 0.00 | 0.2  | 0.22 | CD44                      | CD44 molecule (Indian blood group)                                                |
| 10343134 | 0.6  | 0.00 | 1.1 | 0.00 | 0.0  | 0.95 |                           |                                                                                   |
| 10340782 | 0.5  | 0.05 | 1.1 | 0.00 | 0.4  | 0.23 |                           |                                                                                   |
| 10344149 | 0.3  | 0.25 | 1.1 | 0.00 | -0.8 | 0.02 |                           |                                                                                   |
| 10445119 | 0.5  | 0.01 | 1.1 | 0.00 | 0.2  | 0.03 | HLA-G                     | major histocompatibility complex, class I, G                                      |
| 10340809 | 0.6  | 0.00 | 1.1 | 0.00 | 0.1  | 0.30 |                           |                                                                                   |
| 10425066 | 0.1  | 0.03 | 1.1 | 0.00 | 0.2  | 0.26 | CSF2RB                    | colony stimulating factor 2 receptor,                                             |

|          |      |      |     |      |      |      |                                 |                                                                                       |
|----------|------|------|-----|------|------|------|---------------------------------|---------------------------------------------------------------------------------------|
|          |      |      |     |      |      |      |                                 | beta, low-affinity (granulocyte-macrophage)                                           |
| 10339017 | 0.5  | 0.17 | 1.1 | 0.00 | 0.1  | 0.72 |                                 |                                                                                       |
| 10450069 | 0.8  | 0.00 | 1.1 | 0.00 | 0.2  | 0.01 | H2-K2/H2-Q9                     | histocompatibility 2, K region locus 2                                                |
| 10567825 | 0.1  | 0.10 | 1.1 | 0.00 | 0.1  | 0.34 | LAT                             | linker for activation of T cells                                                      |
| 10350516 | 0.1  | 0.43 | 1.1 | 0.00 | -0.2 | 0.17 | PTGS2                           | prostaglandin-endoperoxide synthase 2 (prostaglandin G/H synthase and cyclooxygenase) |
| 10355967 | 0.1  | 0.06 | 1.1 | 0.00 | 0.1  | 0.22 | AP1S3                           | adaptor-related protein complex 1, sigma 3 subunit                                    |
| 10374236 | 0.4  | 0.01 | 1.1 | 0.00 | -0.2 | 0.01 | UPP1                            | uridine phosphorylase 1                                                               |
| 10466410 | 0.1  | 0.24 | 1.1 | 0.00 | -0.1 | 0.22 | PSAT1                           | phosphoserine aminotransferase 1                                                      |
| 10342565 | 0.4  | 0.33 | 1.1 | 0.00 | -0.1 | 0.83 |                                 |                                                                                       |
| 10421697 | 0.4  | 0.01 | 1.1 | 0.00 | 0.2  | 0.03 | LACC1                           | laccase (multicopper oxidoreductase) domain containing 1                              |
| 10497831 | -0.3 | 0.03 | 1.1 | 0.00 | 0.1  | 0.27 | CCNA2                           | cyclin A2                                                                             |
| 10461629 | 0.7  | 0.00 | 1.1 | 0.00 | 0.3  | 0.00 | Ms4a4b (includes others)        | membrane-spanning 4-domains, subfamily A, member 4B                                   |
| 10559454 | 0.2  | 0.10 | 1.1 | 0.00 | 0.3  | 0.02 | Pira11                          | paired-Ig-like receptor A11                                                           |
| 10542981 | 0.2  | 0.07 | 1.1 | 0.00 | 0.1  | 0.63 | GMFG                            | glia maturation factor, gamma                                                         |
| 10404063 | 0.2  | 0.18 | 1.1 | 0.00 | 0.1  | 0.63 | Hist1h2ab (includes others)     | histone cluster 1, H2ab                                                               |
| 10340391 | 0.7  | 0.04 | 1.1 | 0.01 | 0.5  | 0.17 |                                 |                                                                                       |
| 10360306 | 0.2  | 0.16 | 1.1 | 0.00 | 0.3  | 0.01 | SLAMF8                          | SLAM family member 8                                                                  |
| 10394054 | 0.3  | 0.02 | 1.1 | 0.00 | 0.0  | 0.99 | CD7                             | CD7 molecule                                                                          |
| 10482929 | 0.0  | 0.62 | 1.1 | 0.00 | 0.2  | 0.03 | LY75                            | lymphocyte antigen 75                                                                 |
| 10574141 | 0.4  | 0.01 | 1.1 | 0.00 | 0.0  | 0.74 | NLRC5                           | NLR family, CARD domain containing 5                                                  |
| 10351099 | 0.3  | 0.07 | 1.1 | 0.00 | 0.0  | 0.67 | TNFSF18                         | tumor necrosis factor (ligand) superfamily, member 18                                 |
| 10450242 | 0.5  | 0.00 | 1.1 | 0.00 | 0.2  | 0.10 | C4A/C4B                         | complement component 4B (Chido blood group)                                           |
| 10425053 | 0.3  | 0.00 | 1.1 | 0.00 | 0.3  | 0.07 | NCF4                            | neutrophil cytosolic factor 4, 40kDa                                                  |
| 10356274 | 0.8  | 0.00 | 1.1 | 0.00 | 0.6  | 0.00 | Csprs (includes others)         | component of Sp100-rs                                                                 |
| 10429564 | 0.9  | 0.00 | 1.1 | 0.00 | -0.1 | 0.59 | Ly6a (includes others)          | lymphocyte antigen 6 complex, locus A                                                 |
| 10489127 | 0.3  | 0.05 | 1.1 | 0.00 | 0.3  | 0.06 | RBL1                            | retinoblastoma-like 1 (p107)                                                          |
| 10566574 | 0.7  | 0.00 | 1.1 | 0.00 | 0.2  | 0.36 | Gvin1 (includes others)         | GTPase, very large interferon inducible 1                                             |
| 10343442 | 0.5  | 0.17 | 1.1 | 0.01 | 0.2  | 0.43 |                                 |                                                                                       |
| 10544273 | 0.2  | 0.13 | 1.1 | 0.00 | 0.4  | 0.09 | CLEC5A                          | C-type lectin domain family 5, member A                                               |
| 10366881 | 0.7  | 0.00 | 1.1 | 0.00 | 0.1  | 0.18 | DDIT3                           | DNA-damage-inducible transcript 3                                                     |
| 10538753 | 0.2  | 0.16 | 1.1 | 0.00 | 0.1  | 0.42 |                                 |                                                                                       |
| 10450723 | 0.4  | 0.01 | 1.1 | 0.00 | 0.3  | 0.04 | H2-T10                          | histocompatibility 2, T region locus 10                                               |
| 10347335 | 0.2  | 0.08 | 1.1 | 0.00 | 0.4  | 0.03 | SLC11A1                         | solute carrier family 11 (proton-coupled divalent metal ion transporter), member 1    |
| 10360406 | 0.8  | 0.00 | 1.1 | 0.00 | -0.2 | 0.16 | Ifi204 (includes others)        | interferon activated gene 204                                                         |
| 10408572 | 0.3  | 0.20 | 1.1 | 0.01 | 0.0  | 0.92 |                                 |                                                                                       |
| 10487480 | -0.1 | 0.29 | 1.1 | 0.00 | 0.2  | 0.02 | BUB1                            | BUB1 mitotic checkpoint serine/threonine kinase                                       |
| 10534935 | 0.5  | 0.01 | 1.1 | 0.00 | 0.4  | 0.02 | PILRB                           | paired immunoglobulin-like type 2 receptor beta                                       |
| 10454782 | 0.3  | 0.05 | 1.1 | 0.00 | 0.1  | 0.59 | EGR1                            | early growth response 1                                                               |
| 10531370 | 0.1  | 0.30 | 1.1 | 0.00 | 0.3  | 0.05 | NAAA                            | N-acylthanolamine acid amidase                                                        |
| 10574155 | 0.4  | 0.03 | 1.1 | 0.00 | 0.1  | 0.64 | NLRC5                           | NLR family, CARD domain containing 5                                                  |
| 10340949 | 0.4  | 0.10 | 1.1 | 0.01 | 0.1  | 0.64 |                                 |                                                                                       |
| 10497349 | 0.2  | 0.02 | 1.1 | 0.00 | 0.0  | 0.49 | Sirpb1a (includes others)       | signal-regulatory protein beta 1A                                                     |
| 10569020 | 0.3  | 0.21 | 1.1 | 0.00 | 0.1  | 0.19 | Ifitm6                          | interferon induced transmembrane protein 6                                            |
| 10425410 | 0.2  | 0.11 | 1.1 | 0.00 | 0.1  | 0.52 | GRAP2                           | GRB2-related adaptor protein 2                                                        |
| 10393449 | 0.3  | 0.03 | 1.1 | 0.00 | -0.1 | 0.23 | SOC3                            | suppressor of cytokine signaling 3                                                    |
| 10475517 | 0.1  | 0.22 | 1.1 | 0.00 | 0.0  | 0.95 | C15orf48                        | chromosome 15 open reading frame 48                                                   |
| 10343490 | 0.5  | 0.15 | 1.1 | 0.00 | -0.5 | 0.18 |                                 |                                                                                       |
| 10554789 | 0.2  | 0.06 | 1.1 | 0.00 | 0.1  | 0.48 | CTSC                            | cathepsin C                                                                           |
| 10356248 | 0.4  | 0.01 | 1.1 | 0.00 | 0.3  | 0.01 | C130026I21Rik (includes others) | RIKEN cDNA C130026I21 gene                                                            |
| 10567580 | 0.5  | 0.01 | 1.1 | 0.00 | 0.5  | 0.05 | IGSF6                           | immunoglobulin superfamily, member 6                                                  |
| 10385428 | 0.2  | 0.00 | 1.1 | 0.00 | 0.2  | 0.04 | ITK                             | IL2-inducible T-cell kinase                                                           |
| 10489891 | 0.4  | 0.00 | 1.1 | 0.00 | 0.1  | 0.39 | B4GALT5                         | UDP-Gal:betaGlcNAc beta 1,4-galactosyltransferase, polypeptide 5                      |
| 10548375 | 0.0  | 0.88 | 1.1 | 0.00 | 1.2  | 0.00 | CLEC7A                          | C-type lectin domain family 7, member A                                               |
| 10538290 | 0.3  | 0.00 | 1.1 | 0.00 | 0.1  | 0.43 | SNX10                           | sorting nexin 10                                                                      |
| 10481949 | 0.1  | 0.26 | 1.1 | 0.00 | 0.0  | 0.65 | TRAF1                           | TNF receptor-associated factor 1                                                      |
| 10435704 | 0.2  | 0.10 | 1.0 | 0.00 | -0.1 | 0.66 | CD80                            | CD80 molecule                                                                         |
| 10538135 | 0.1  | 0.43 | 1.0 | 0.00 | 0.0  | 0.91 | GIMAP7                          | GTPase, IMAP family member 7                                                          |
| 10487011 | 0.0  | 0.72 | 1.0 | 0.00 | 0.5  | 0.02 | GATM                            | glycine amidinotransferase (L-arginine:glycine amidinotransferase)                    |
| 10487597 | 0.1  | 0.67 | 1.0 | 0.00 | 0.0  | 0.77 | IL1B                            | interleukin 1, beta                                                                   |
| 10601581 | 0.5  | 0.00 | 1.0 | 0.00 | 0.1  | 0.02 |                                 |                                                                                       |
| 10500677 | 0.0  | 0.85 | 1.0 | 0.00 | -0.1 | 0.18 | CD2                             | CD2 molecule                                                                          |
| 10481627 | 0.8  | 0.00 | 1.0 | 0.00 | -0.8 | 0.00 | LCN2                            | lipocalin 2                                                                           |
| 10548892 | 0.2  | 0.05 | 1.0 | 0.00 | 0.2  | 0.02 | ARHGDB                          | Rho GDP dissociation inhibitor                                                        |

|          |      |      |      |      |      |      |                           |                                                                                                |
|----------|------|------|------|------|------|------|---------------------------|------------------------------------------------------------------------------------------------|
| 10582862 | 0.4  | 0.01 | 1.0  | 0.00 | 0.2  | 0.35 | SP140                     | (GDI) beta<br>SP140 nuclear body protein                                                       |
| 10340154 | 0.5  | 0.01 | 1.0  | 0.00 | 0.2  | 0.44 |                           |                                                                                                |
| 10382106 | 0.6  | 0.00 | 1.0  | 0.00 | 0.3  | 0.12 | Milr1                     | mast cell immunoglobulin like<br>receptor 1                                                    |
| 10595148 | 0.1  | 0.57 | 1.0  | 0.00 | 0.0  | 0.72 |                           |                                                                                                |
| 10547985 | 0.0  | 0.88 | 1.0  | 0.00 | 0.0  | 0.97 | CD27                      | CD27 molecule                                                                                  |
| 10357875 | -0.3 | 0.26 | 1.0  | 0.00 | 0.2  | 0.31 | BTG2                      | BTG family, member 2                                                                           |
| 10413047 | 0.0  | 0.81 | 1.0  | 0.00 | 0.3  | 0.05 | PLAU                      | plasminogen activator, urokinase                                                               |
| 10344052 | 0.6  | 0.22 | 1.0  | 0.02 | 0.0  | 0.91 |                           |                                                                                                |
| 10562637 | -0.1 | 0.33 | 1.0  | 0.00 | -0.2 | 0.07 | Ccnb1/Gm5593              | cyclin B1                                                                                      |
| 10341593 | 0.4  | 0.08 | 1.0  | 0.00 | 0.1  | 0.62 |                           |                                                                                                |
| 10559478 | 0.4  | 0.04 | 1.0  | 0.00 | 0.1  | 0.32 | LILRB3                    | leukocyte immunoglobulin-like<br>receptor, subfamily B (with TM and<br>ITIM domains), member 3 |
| 10366848 | 0.1  | 0.09 | 1.0  | 0.00 | 0.1  | 0.48 | B4GALNT1                  | beta-1,4-N-acetyl-galactosaminyl<br>transferase 1                                              |
| 10411739 | 0.0  | 0.84 | 1.0  | 0.00 | -0.2 | 0.02 | Ccnb1/Gm5593              | cyclin B1                                                                                      |
| 10342412 | 0.4  | 0.11 | 1.0  | 0.00 | 0.4  | 0.10 |                           |                                                                                                |
| 10368144 | 0.1  | 0.10 | 1.0  | 0.00 | 0.0  | 0.73 | TNFAIP3                   | tumor necrosis factor, alpha-induced<br>protein 3                                              |
| 10490903 | 0.3  | 0.01 | 1.0  | 0.00 | 0.2  | 0.08 | CA13                      | carbonic anhydrase XIII                                                                        |
| 10444824 | 0.4  | 0.00 | 1.0  | 0.00 | 0.3  | 0.01 | HLA-B                     | major histocompatibility complex,<br>class I, B                                                |
| 10480035 | 0.4  | 0.00 | 1.0  | 0.00 | 0.1  | 0.10 | PFKFB3                    | 6-phosphofructo-2-kinase/fructose-<br>2,6-biphosphatase 3                                      |
| 10344592 | -0.5 | 0.12 | 1.0  | 0.01 | 0.1  | 0.84 |                           |                                                                                                |
| 10547590 | 0.4  | 0.01 | 1.0  | 0.00 | 0.1  | 0.51 | KLRG1                     | killer cell lectin-like receptor<br>subfamily G, member 1                                      |
| 10471929 | 0.0  | 0.88 | 1.0  | 0.00 | 0.1  | 0.26 | ARHGAP15                  | Rho GTPase activating protein 15                                                               |
| 10510260 | 0.1  | 0.74 | 1.0  | 0.00 | -0.2 | 0.39 | Nppb                      | natriuretic peptide type B                                                                     |
| 10341908 | 0.7  | 0.01 | 1.0  | 0.00 | -0.1 | 0.85 |                           |                                                                                                |
| 10569017 | 0.8  | 0.00 | 1.0  | 0.00 | 0.1  | 0.15 | IFITM2                    | interferon induced transmembrane<br>protein 2                                                  |
| 10554162 | 0.0  | 0.64 | 1.0  | 0.00 | -0.2 | 0.19 |                           |                                                                                                |
| 10405587 | 0.0  | 0.72 | 1.0  | 0.00 | 0.2  | 0.06 | TGFBI                     | transforming growth factor, beta-<br>induced, 68kDa                                            |
| 10433507 | 0.1  | 0.50 | 1.0  | 0.00 | 0.1  | 0.56 | CIITA                     | class II, major histocompatibility<br>complex, transactivator                                  |
| 10587339 | 0.1  | 0.13 | 1.0  | 0.00 | 0.1  | 0.17 |                           |                                                                                                |
| 10367532 | 0.1  | 0.50 | 1.0  | 0.00 | 0.0  | 0.56 | TESPA1                    | thymocyte expressed, positive<br>selection associated 1                                        |
| 10566333 | 0.6  | 0.00 | 1.0  | 0.00 | 0.1  | 0.12 | TRIM5                     | tripartite motif containing 5                                                                  |
| 10597648 | 0.4  | 0.00 | 1.0  | 0.00 | 0.1  | 0.01 | MYD88                     | myeloid differentiation primary<br>response 88                                                 |
| 10390763 | 0.1  | 0.49 | 1.0  | 0.00 | -0.1 | 0.50 | CCR7                      | chemokine (C-C motif) receptor 7                                                               |
| 10360158 | 0.3  | 0.03 | 1.0  | 0.00 | 0.3  | 0.05 | LY9                       | lymphocyte antigen 9                                                                           |
| 10338225 | 0.4  | 0.10 | 1.0  | 0.00 | 0.5  | 0.05 |                           |                                                                                                |
| 10347933 | 0.4  | 0.02 | 1.0  | 0.00 | 0.2  | 0.37 | SP140                     | SP140 nuclear body protein                                                                     |
| 10342214 | 0.2  | 0.60 | 1.0  | 0.00 | -0.1 | 0.71 |                           |                                                                                                |
| 10351667 | -0.1 | 0.82 | 1.0  | 0.00 | 0.1  | 0.35 | SLAMF1                    | signaling lymphocytic activation<br>molecule family member 1                                   |
| 10450374 | 0.3  | 0.09 | 1.0  | 0.00 | 0.1  | 0.33 |                           |                                                                                                |
| 10601424 | 0.2  | 0.27 | 1.0  | 0.00 | 0.0  | 0.83 | GPR174                    | G protein-coupled receptor 174                                                                 |
| 10344407 | 0.2  | 0.48 | 1.0  | 0.00 | 0.4  | 0.03 |                           |                                                                                                |
| 10515836 | 0.0  | 0.77 | 1.0  | 0.00 | -0.1 | 0.16 | Ccnb1/Gm5593              | cyclin B1                                                                                      |
| 10342377 | -0.1 | 0.78 | 1.0  | 0.01 | 0.5  | 0.05 |                           |                                                                                                |
| 10541605 | 0.5  | 0.02 | 1.0  | 0.00 | 0.1  | 0.77 | CLEC6A                    | C-type lectin domain family 6,<br>member A                                                     |
| 10504755 | 0.3  | 0.01 | 1.0  | 0.00 | 0.1  | 0.20 | BC057193                  | cDNA sequence BC057193                                                                         |
| 10548415 | 0.4  | 0.02 | 1.0  | 0.00 | -0.1 | 0.40 | Klri1                     | killer cell lectin-like receptor family<br>I member 1                                          |
| 10340199 | 0.1  | 0.84 | 1.0  | 0.00 | -0.5 | 0.08 |                           |                                                                                                |
| 10356866 | 0.0  | 0.71 | 1.0  | 0.00 | 0.0  | 1.00 | PDCD1                     | programmed cell death 1                                                                        |
| 10363161 | 0.3  | 0.06 | 1.0  | 0.00 | 0.2  | 0.18 | TMEM229B                  | transmembrane protein 229B                                                                     |
| 10507908 | 0.0  | 0.66 | 1.0  | 0.00 | 0.0  | 0.77 | FHL3                      | four and a half LIM domains 3                                                                  |
| 10343761 | 0.6  | 0.03 | 1.0  | 0.00 | 0.6  | 0.06 |                           |                                                                                                |
| 10475414 | 0.9  | 0.00 | 1.0  | 0.00 | 0.3  | 0.01 | B2M                       | beta-2-microglobulin                                                                           |
| 10361133 | 0.5  | 0.00 | 1.0  | 0.00 | 0.0  | 0.96 |                           |                                                                                                |
| 10339990 | 0.8  | 0.00 | 1.0  | 0.00 | 0.0  | 0.84 |                           |                                                                                                |
| 10508734 | 0.0  | 0.85 | 1.0  | 0.00 | 0.5  | 0.02 | PTAFR                     | platelet-activating factor receptor                                                            |
| 10536898 | 0.2  | 0.02 | 1.0  | 0.00 | 0.1  | 0.28 | IRF5                      | interferon regulatory factor 5                                                                 |
| 10582868 | 0.2  | 0.12 | 1.0  | 0.00 | 0.1  | 0.51 |                           |                                                                                                |
| 10407985 | 0.1  | 0.33 | 1.0  | 0.01 | 0.1  | 0.67 | GPR141                    | G protein-coupled receptor 141                                                                 |
| 10338478 | 0.3  | 0.29 | 1.0  | 0.02 | 0.2  | 0.41 |                           |                                                                                                |
| 10461723 | 0.1  | 0.50 | 1.0  | 0.00 | 0.0  | 0.77 | FAM111A                   | family with sequence similarity 111,<br>member A                                               |
| 10342606 | 0.4  | 0.15 | 1.0  | 0.01 | 0.3  | 0.28 |                           |                                                                                                |
| 10608649 | 0.6  | 0.00 | 1.0  | 0.00 | 0.1  | 0.21 |                           |                                                                                                |
| 10351792 | 0.3  | 0.04 | 1.0  | 0.00 | 0.3  | 0.01 | SLAMF9                    | SLAM family member 9                                                                           |
| 10601421 | 0.3  | 0.01 | 1.0  | 0.01 | -0.1 | 0.82 | A630033H20Rik             | RIKEN cDNA A630033H20 gene                                                                     |
| 10474875 | -0.3 | 0.03 | 1.0  | 0.00 | 0.1  | 0.48 | CASC5                     | cancer susceptibility candidate 5                                                              |
| 10349401 | 0.0  | 0.66 | 1.0  | 0.00 | 0.2  | 0.16 | GPR39                     | G protein-coupled receptor 39                                                                  |
| 10430190 | 0.0  | 0.69 | 1.0  | 0.00 | 0.2  | 0.07 | Apo110a (includes others) | apolipoprotein L 11a                                                                           |
| 10586448 | 0.0  | 0.79 | 1.0  | 0.00 | 0.3  | 0.12 | KIAA0101                  | KIAA0101                                                                                       |
| 10594053 | 0.6  | 0.01 | 1.0  | 0.00 | 0.0  | 0.88 | PML                       | promyelocytic leukemia                                                                         |
| 10602385 | -0.1 | 0.69 | -1.0 | 0.00 | 0.1  | 0.63 | PFKFB1                    | 6-phosphofructo-2-kinase/fructose-<br>2,6-biphosphatase 1                                      |



|          |      |      |      |      |      |      |          |                            |
|----------|------|------|------|------|------|------|----------|----------------------------|
| 10340749 | 0.2  | 0.58 | -1.0 | 0.05 | -0.4 | 0.31 |          |                            |
| 10339035 | -0.2 | 0.53 | -1.0 | 0.00 | 0.0  | 0.86 |          |                            |
| 10338755 | 0.3  | 0.35 | -1.0 | 0.00 | -0.3 | 0.32 |          |                            |
| 10436095 | -0.2 | 0.52 | -1.0 | 0.03 | 0.7  | 0.02 | Retnla   | resistin like alpha        |
| 10354299 | 0.1  | 0.58 | -1.1 | 0.00 | -0.6 | 0.00 | Mettl21e | methyltransferase like 21E |
| 10344113 | -0.4 | 0.37 | -1.1 | 0.02 | 0.0  | 0.91 |          |                            |
| 10340272 | -0.6 | 0.18 | -1.1 | 0.04 | 0.2  | 0.67 |          |                            |
| 10342598 | 0.3  | 0.58 | -1.1 | 0.05 | -0.1 | 0.82 |          |                            |
| 10341361 | 0.0  | 0.97 | -1.1 | 0.01 | -0.5 | 0.09 |          |                            |
| 10341762 | -0.3 | 0.43 | -1.1 | 0.05 | 0.5  | 0.28 |          |                            |
| 10340062 | 0.0  | 0.95 | -1.2 | 0.00 | -0.8 | 0.02 |          |                            |
| 10518526 | -0.5 | 0.04 | -1.3 | 0.00 | 0.3  | 0.24 | ANGPTL7  | angiotensin-like 7         |

**Online Table 10. List of differentially expressed genes on 60 dpi (log ratio > 1 or < -1, P value < 0.05)**

| Probe Set ID | 4 dpi     |                   | 7 dpi     |                   | 60 dpi    |                   | Symbol   | Entrez Gene Name                                                                          |
|--------------|-----------|-------------------|-----------|-------------------|-----------|-------------------|----------|-------------------------------------------------------------------------------------------|
|              | Log ratio | P values (t-test) | Log ratio | P values (t-test) | Log ratio | P values (t-test) |          |                                                                                           |
| 10583056     | 0.0       | 0.83              | 0.2       | 0.24              | 3.5       | 0.00              | MMP12    | matrix metalloproteinase 12 (macrophage elastase)                                         |
| 10538187     | -0.1      | 0.47              | 1.3       | 0.00              | 3.2       | 0.00              | GNPMB    | glycoprotein (transmembrane) nmb                                                          |
| 10511779     | 0.2       | 0.14              | 0.4       | 0.05              | 3.0       | 0.00              | ATP6V0D2 | ATPase, H+ transporting, lysosomal 38kDa, V0 subunit d2                                   |
| 10455970     | 6.6       | 0.00              | 6.8       | 0.00              | 2.8       | 0.00              |          |                                                                                           |
| 10545237     | -0.1      | 0.46              | -0.1      | 0.74              | 2.1       | 0.05              |          |                                                                                           |
| 10523717     | 0.4       | 0.03              | 2.6       | 0.00              | 2.0       | 0.00              | SPP1     | secreted phosphoprotein 1                                                                 |
| 10450161     | 0.2       | 0.19              | 2.6       | 0.00              | 1.7       | 0.00              | HLA-DRA  | major histocompatibility complex, class II, DR alpha                                      |
| 10547740     | 1.4       | 0.04              | 0.2       | 0.86              | 1.7       | 0.04              | C1S      | complement component 1, s subcomponent                                                    |
| 10545173     | -0.1      | 0.56              | 0.6       | 0.06              | 1.6       | 0.01              |          |                                                                                           |
| 10456005     | 0.1       | 0.47              | 2.5       | 0.00              | 1.6       | 0.00              | CD74     | CD74 molecule, major histocompatibility complex, class II invariant chain                 |
| 10450154     | 0.1       | 0.69              | 2.4       | 0.00              | 1.5       | 0.00              | HLA-DQA1 | major histocompatibility complex, class II, DQ alpha 1                                    |
| 10494262     | -0.4      | 0.05              | 0.1       | 0.31              | 1.5       | 0.00              | CTSK     | cathepsin K                                                                               |
| 10522788     | 0.6       | 0.00              | 2.1       | 0.00              | 1.4       | 0.00              | STAP1    | signal transducing adaptor family member 1                                                |
| 10608681     | 5.1       | 0.00              | 6.3       | 0.00              | 1.4       | 0.00              | Gm4841   | predicted gene 4841                                                                       |
| 10403021     | 0.1       | 0.20              | 0.3       | 0.01              | 1.4       | 0.00              |          |                                                                                           |
| 10531126     | -0.3      | 0.21              | 0.5       | 0.00              | 1.3       | 0.00              | IGJ      | immunoglobulin J polypeptide, linker protein for immunoglobulin alpha and mu polypeptides |
| 10338640     | 1.0       | 0.16              | -0.3      | 0.64              | 1.3       | 0.02              |          |                                                                                           |
| 10557895     | 0.1       | 0.60              | 1.3       | 0.00              | 1.3       | 0.01              | ITGAX    | integrin, alpha X (complement component 3 receptor 4 subunit)                             |
| 10414360     | 0.2       | 0.02              | 1.7       | 0.00              | 1.3       | 0.00              | LGALS3   | lectin, galactoside-binding, soluble, 3                                                   |
| 10545231     | 0.1       | 0.56              | 2.3       | 0.00              | 1.2       | 0.02              |          |                                                                                           |
| 10403038     | -0.1      | 0.07              | 0.4       | 0.01              | 1.2       | 0.01              |          |                                                                                           |
| 10548375     | 0.0       | 0.88              | 1.1       | 0.00              | 1.2       | 0.00              | CLEC7A   | C-type lectin domain family 7, member A                                                   |
| 10603551     | 0.4       | 0.01              | 1.6       | 0.00              | 1.2       | 0.00              | CYBB     | cytochrome b-245, beta polypeptide                                                        |
| 10372410     | 0.5       | 0.00              | 1.7       | 0.00              | 1.1       | 0.00              | GLIPR1   | GLI pathogenesis-related 1                                                                |
| 10455961     | 3.3       | 0.00              | 4.3       | 0.00              | 1.1       | 0.00              | Iigp1    | interferon inducible GTPase 1                                                             |
| 10542164     | 0.5       | 0.00              | 2.5       | 0.00              | 1.1       | 0.00              | CLEC12A  | C-type lectin domain family 12, member A                                                  |
| 10444291     | 0.1       | 0.46              | 2.5       | 0.00              | 1.1       | 0.00              | HLA-DQB1 | major histocompatibility complex, class II, DQ beta 1                                     |
| 10358408     | 0.5       | 0.00              | 2.3       | 0.00              | 1.1       | 0.00              | RGS1     | regulator of G-protein signaling 1                                                        |
| 10461721     | 0.7       | 0.00              | 2.5       | 0.00              | 1.1       | 0.00              | MPEG1    | macrophage expressed 1                                                                    |
| 10545247     | 0.3       | 0.10              | 0.4       | 0.05              | 1.1       | 0.02              |          |                                                                                           |
| 10427628     | 0.2       | 0.09              | 2.0       | 0.00              | 1.1       | 0.00              | IL7R     | interleukin 7 receptor                                                                    |
| 10376324     | 3.8       | 0.00              | 5.4       | 0.00              | 1.0       | 0.00              | Gm12250  | predicted gene 12250                                                                      |
| 10531407     | 2.9       | 0.00              | 4.9       | 0.00              | 1.0       | 0.00              | CXCL9    | chemokine (C-X-C motif) ligand 9                                                          |
| 10545198     | -0.3      | 0.15              | 0.0       | 0.98              | 1.0       | 0.01              |          |                                                                                           |
| 10517165     | 1.0       | 0.00              | 3.0       | 0.00              | 1.0       | 0.00              | Cd52     | CD52 antigen                                                                              |
| 10459066     | 3.9       | 0.00              | 6.3       | 0.00              | 1.0       | 0.00              | Gm4841   | predicted gene 4841                                                                       |
| 10494271     | 0.9       | 0.00              | 2.3       | 0.00              | 1.0       | 0.01              | CTSS     | cathepsin S                                                                               |
| 10339525     | 0.0       | 0.97              | 0.2       | 0.59              | 1.0       | 0.01              |          |                                                                                           |
| 10344291     | 0.4       | 0.55              | 0.1       | 0.90              | -1.0      | 0.01              |          |                                                                                           |
| 10546432     | 0.2       | 0.51              | -0.6      | 0.03              | -1.0      | 0.00              | ADAMTS9  | ADAM metalloproteinase with thrombospondin type 1 motif, 9                                |
| 10343814     | 0.1       | 0.85              | -0.3      | 0.66              | -1.0      | 0.01              |          |                                                                                           |
| 10359867     | 0.6       | 0.06              | -0.8      | 0.00              | -1.1      | 0.00              | LRRC52   | leucine rich repeat containing 52                                                         |
| 10338097     | 0.6       | 0.34              | 0.6       | 0.12              | -1.3      | 0.02              |          |                                                                                           |
| 10343939     | 0.3       | 0.42              | 0.2       | 0.62              | -1.4      | 0.01              |          |                                                                                           |
| 10504838     | 0.6       | 0.03              | -0.7      | 0.00              | -2.1      | 0.00              | NR4A3    | nuclear receptor subfamily 4, group A, member 3                                           |

**Online Table 11. Top networks identified by IPA of microarray data of heart samples from TMEV-infected mice\***

| <b>ID</b>     | <b>Associated Network Functions</b>                                                       | <b>Score<sup>†</sup></b> |
|---------------|-------------------------------------------------------------------------------------------|--------------------------|
| <b>4 dpi</b>  |                                                                                           |                          |
| 1             | Infectious Disease, Antimicrobial Response, Inflammatory Response                         | 43                       |
| 2             | Antimicrobial Response, Inflammatory Response, Infectious Disease                         | 43                       |
| 3             | Infectious Disease, Humoral Immune Response, Protein Synthesis                            | 34                       |
| 4             | Cell-To-Cell Signaling and Interaction, Cellular Movement, Immune Cell Trafficking        | 31                       |
| 5             | Dermatological Diseases and Conditions, Cellular Movement, Immune Cell Trafficking        | 23                       |
| <b>7 dpi</b>  |                                                                                           |                          |
| 1             | Infectious Disease, Cellular Function and Maintenance, Antimicrobial Response             | 47                       |
| 2             | Cell Death and Survival, Antigen Presentation, Protein Synthesis                          | 38                       |
| 3             | Lymphoid Tissue Structure and Development, Tissue Morphology, Antimicrobial Response      | 35                       |
| 4             | Infectious Disease, Antimicrobial Response, Inflammatory Response                         | 35                       |
| 5             | Infectious Disease, Cell Death and Survival, Cell-To-Cell Signaling and Interaction       | 33                       |
| <b>60 dpi</b> |                                                                                           |                          |
| 1             | Cellular Function and Maintenance, Inflammatory Response, Cellular Movement               | 33                       |
| 2             | Cellular Movement, Immune Cell Trafficking, Hematological System Development and Function | 12                       |
| 3             | Ophthalmic Disease, DNA Replication, Recombination, and Repair, Cell Death and Survival   | 2                        |
| 4             | Cellular Assembly and Organization, Neurological Disease, Cardiovascular Disease          | 2                        |

\*Genes were clustered by Ingenuity Pathway Analysis (IPA) Network Generation Algorithm.

<sup>†</sup>Network score was calculated based on the right-tailed Fisher's Exact Test that takes into account: 1) the number of Network Eligible molecules in the network, 2) size of the network, 3) the total number of Network Eligible molecules in the given dataset, and 4) the number of molecules in the IPA database that could potentially be included in the networks.

**Online Table 12. Top toxicity functions (cardiotoxicity)**

| Name                          | <i>P</i> value | # of molecules | Molecules                                                                   |
|-------------------------------|----------------|----------------|-----------------------------------------------------------------------------|
| <b>4 dpi</b>                  |                |                |                                                                             |
| 1 Cardiac Inflammation        | 0.0001 – 0.22  | 4              | <i>Ccl2, Ccl3, Ccr5, Tlr3</i>                                               |
| 2 Cardiac Infarction          | 0.01 – 0.01    | 3              | <i>Ccl2, Ccl3, Stat1</i>                                                    |
| 3 Cardiac Dysfunction         | 0.01 – 0.01    | 2              | <i>Ccl2, Timp1</i>                                                          |
| 4 Cardiac Output              | 0.03 – 0.16    | 1              | <i>Tnfsf10</i>                                                              |
| 5 Pulmonary Hypertension      | 0.03 – 0.03    | 1              | <i>Tnfsf10</i>                                                              |
| <b>7 dpi</b>                  |                |                |                                                                             |
| 1 Cardiac Inflammation        | 7E-11 – 0.57   | 11             | <i>Ccl2, Ccl3, Ccr2, Ccr5, Ifng, Itgal, Itgam, Itgb2, Prf1, Stat4, Tlr3</i> |
| 2 Cardiac Infarction          | 0.0003 – 0.15  | 8              | <i>Ccl2, Ccl3, Cd44, Cybb, Fcer1g, Il6, Stat1, Lck</i>                      |
| 3 Cardiac Dysfunction         | 0.001 – 0.07   | 5              | <i>Ccl2, Cybb, Plau, Timp1, Ifng</i>                                        |
| 4 Cardiac Dilation            | 0.002 – 0.002  | 5              | <i>Ccna2, Ifng, Plau, Spp1, Timp1</i>                                       |
| 5 Cardiac Necrosis/Cell Death | 0.003 – 0.005  | 8              | <i>Casp1, Cybb, Il1b, Il1rn, Lcn2, Sprr1a, Stat1, Tnfaip3</i>               |
| <b>60 dpi</b>                 |                |                |                                                                             |
| 1 Cardiac Dysfunction         | 0.005 – 0.005  | 2              | <i>Cybb, Ppargc1a</i>                                                       |
| 2 Cardiac Fibrosis            | 0.01 – 0.01    | 2              | <i>Cybb, Spp1</i>                                                           |
| 3 Cardiac Dilation            | 0.07 – 0.07    | 1              | <i>Spp1</i>                                                                 |
| 4 Cardiac Infarction          | 0.10 – 0.10    | 1              | <i>Cybb</i>                                                                 |
| 5 Cardiac Necrosis/Cell Death | 0.15 – 0.15    | 1              | <i>Cybb</i>                                                                 |

Cardiotoxicities were ranked by IPA. *P* values were calculated by Fisher's Exact Test.

## V. Online Figures

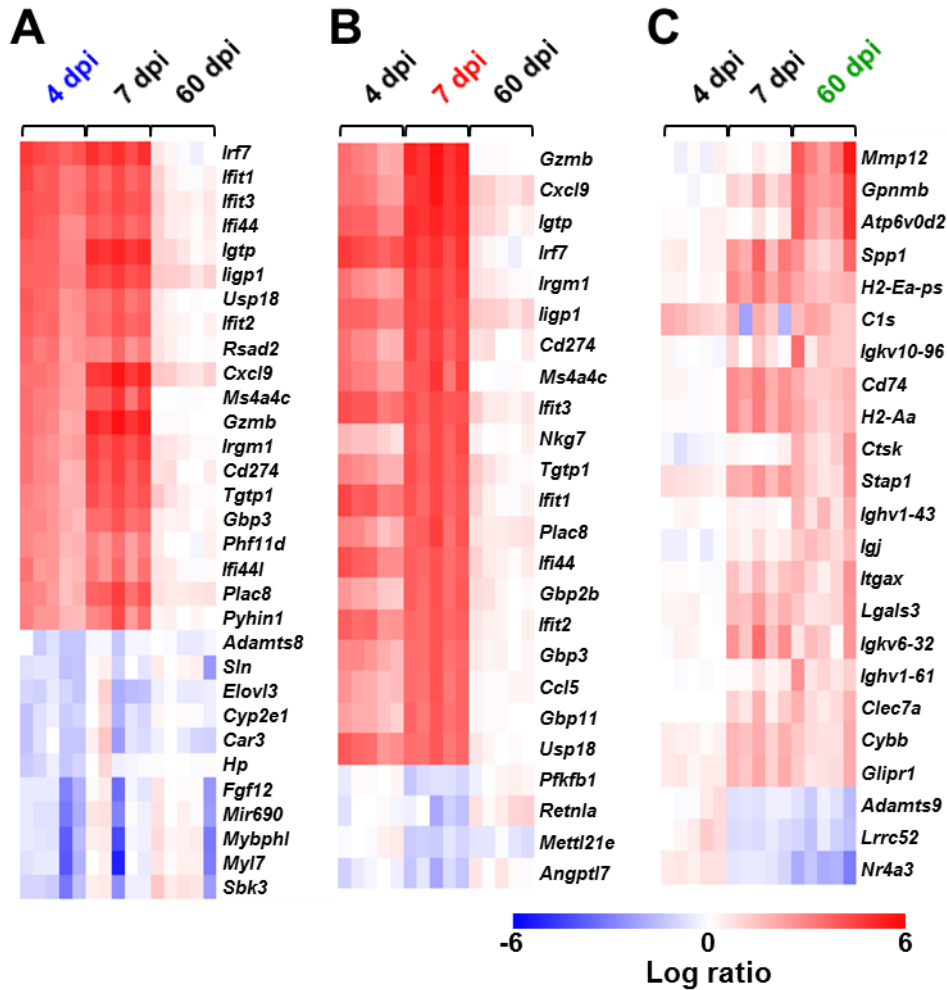

**Online Figure 1.** Heat maps of most highly up- or down-regulated genes in the hearts of TMEV-infected mice on 4 (A), 7 (B), and 60 dpi (C). A) On 4 dpi, 20 upregulated and 16 downregulated genes. B) On 7 dpi, 20 upregulated and 7 downregulated genes. C) On 60 dpi, 20 upregulated and 4 downregulated genes. Gene expression patterns of (A) and (B) were similar between 4 and 7 dpi, while those in (C) were similar between 7 and 60 dpi. Red, blue, and white indicate upregulation, downregulation, and no change, compared with control mice, respectively. Each column represents the data from one mouse.  $n = 5/\text{dpi}$ . A list of abbreviations of genes is shown in Online Table 1.

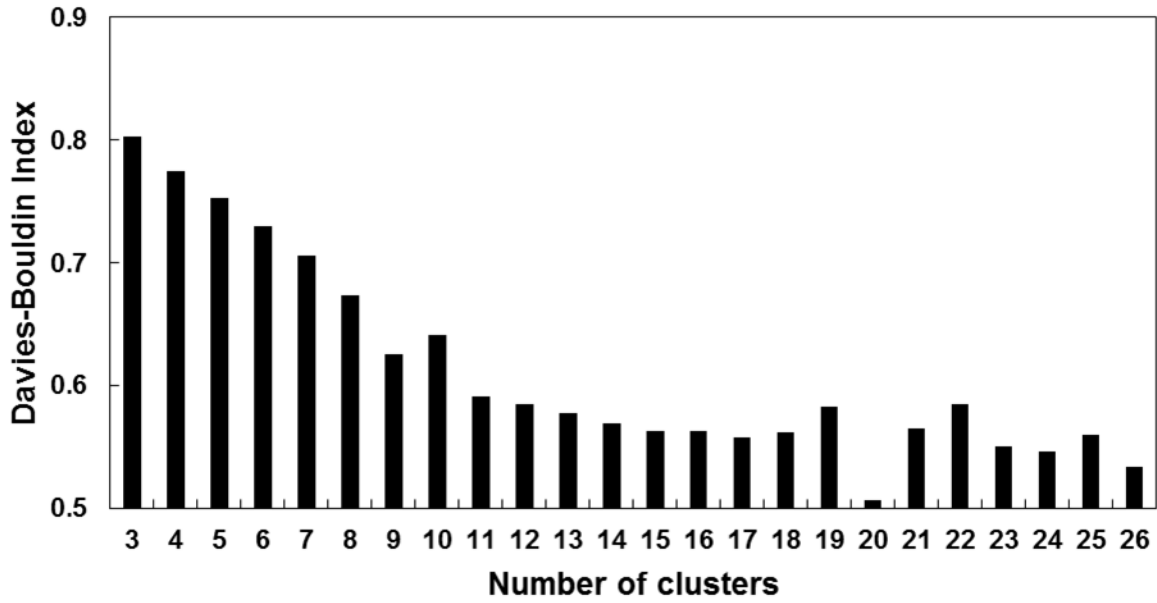

**Online Figure 2.** Davies-Bouldin index of  $k$ -means clustering for microarray data of the hearts from TMEV-infected mice (total number of mice = 15, five mice/dpi). We used Davies-Bouldin index to determine the optimum number of clusters in  $k$ -means clustering and obtained the lowest score (0.51) when microarray data were separated into 20 clusters.

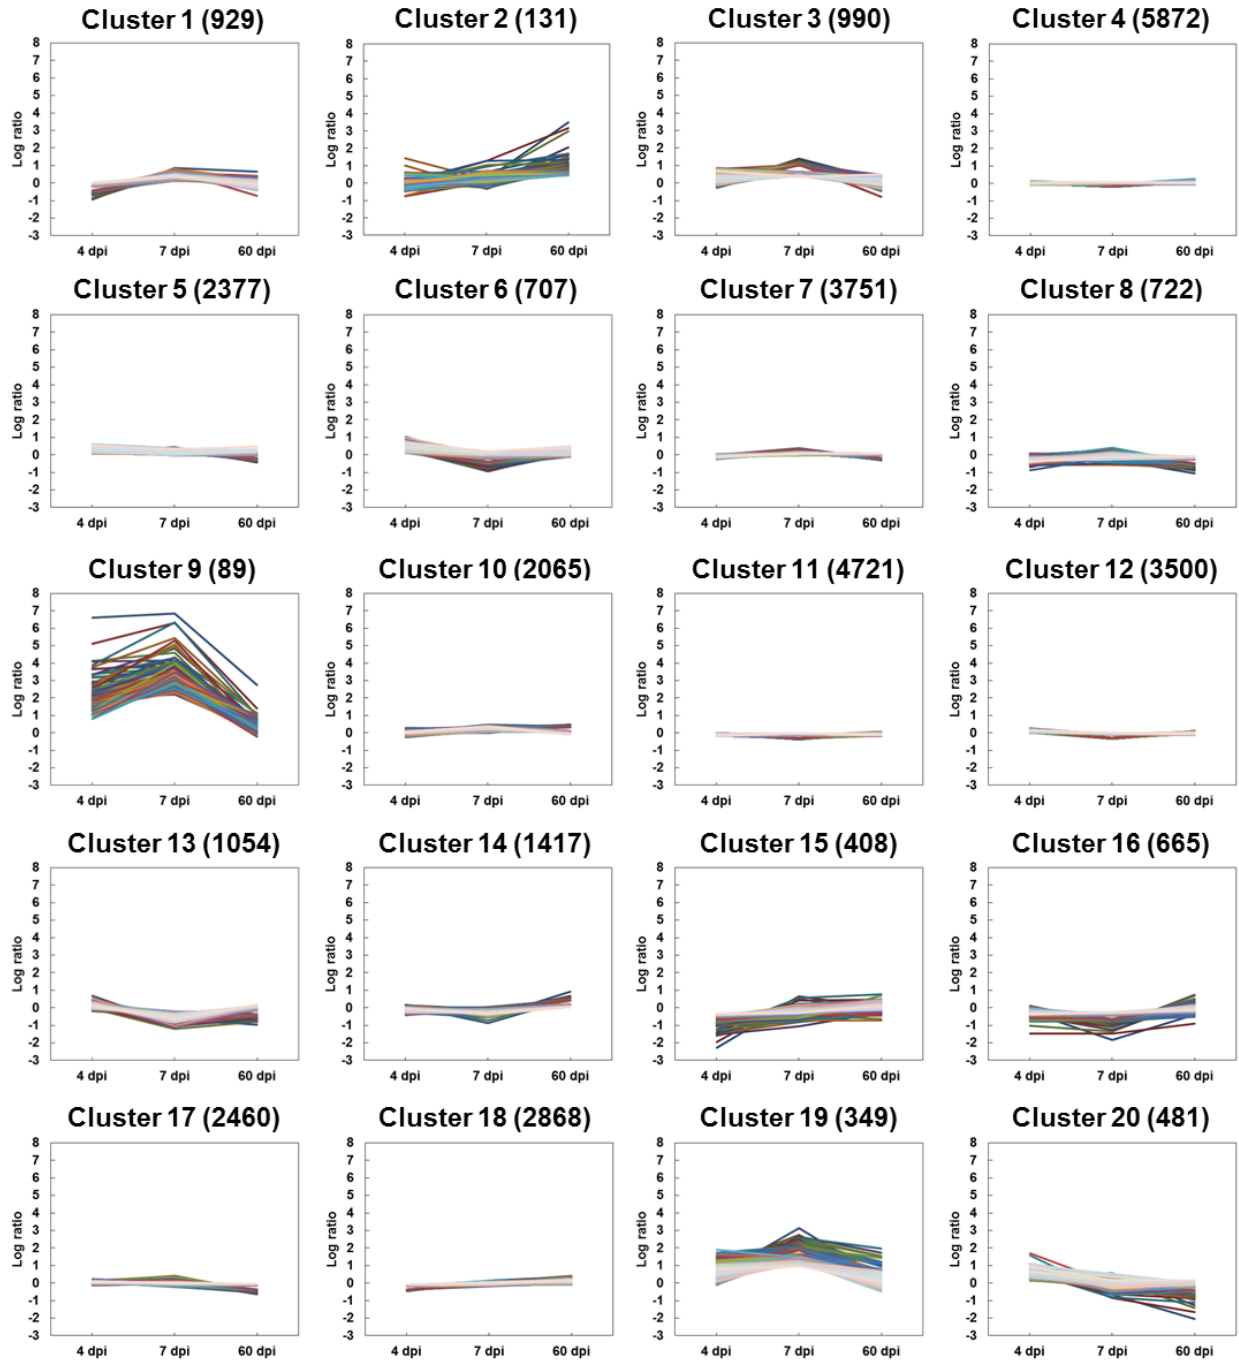

**Online Figure 3.** The gene expression patterns of 20 clusters separated by *k*-means clustering. Graphs were drawn using the genes of top 80, middle 80, and bottom 80 (total 240 genes) in each cluster. The number next to a cluster number indicated the number of genes in each cluster.

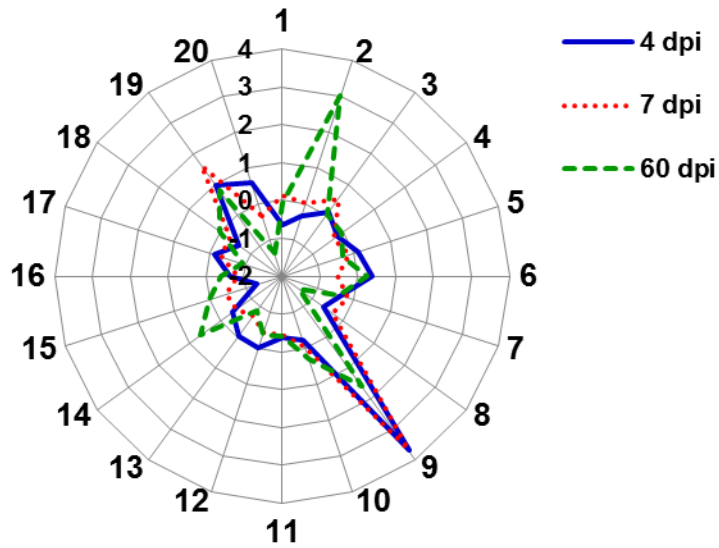

**Online Figure 4.** Radar chart of expression patterns of cluster center genes of 20 clusters by *k*-means clustering. Clusters 2, 9, and 19 included cardiac remodeling-, innate immunity-, and acquired immunity-related genes, respectively. The number at each vertex is the cluster number (1 to 20), while the numbers along the axis (-2 to 4) are log ratios, compared with age-matched controls.



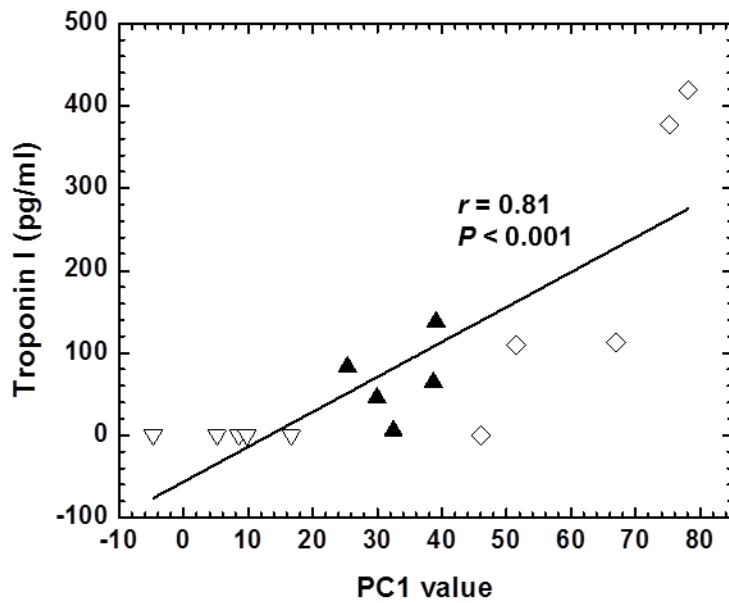

**Online Figure 5.** Correlation between disease activity and PC1 values. As an indicator of disease activity, cardiac troponin I levels in sera determined by ELISA were used. The PC1 values were calculated using microarray data by R and R package ‘prcomp’. There was a strong correlation between troponin levels and PC1 values ( $r = 0.81$ ,  $P < 0.001$ ). This suggested that the PC1 value reflected the disease activity. ▽: 60 days post infection (dpi), ▲: 4 dpi, ◇: 7 dpi.

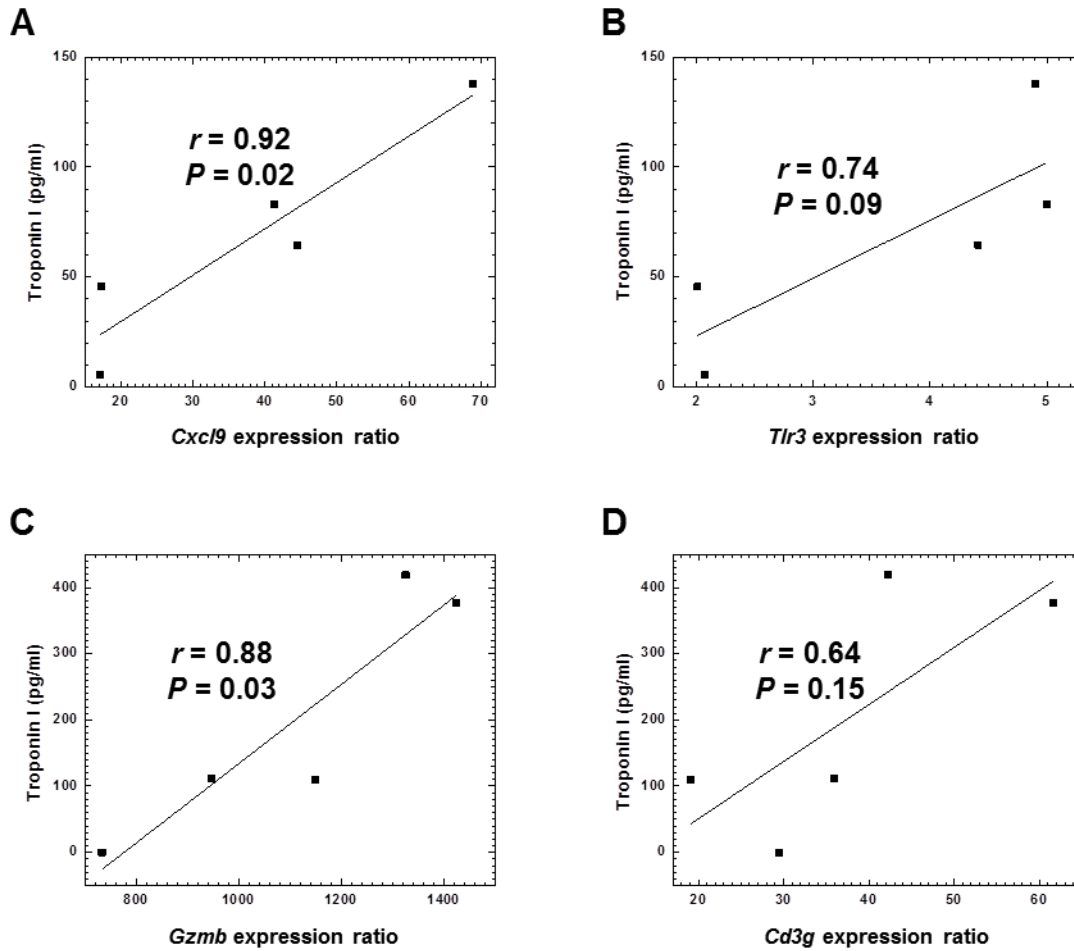

**Online Figure 6.** Correlations between serum troponin I levels and gene expression ratios (real-time PCR). There were strong correlations between troponin I levels and gene expression ratios of Chemokine (C-X-C motif) ligand 9 (*Cxcl9*) (A) or toll-like receptor 3 (*Tlr3*) (B) on 4 dpi. There was also a strong correlation between troponin I levels and gene expression ratios of granzyme B (*Gzmb*) (C), but not CD3  $\gamma$  subunit (*Cd3g*) (D), on 7 dpi.

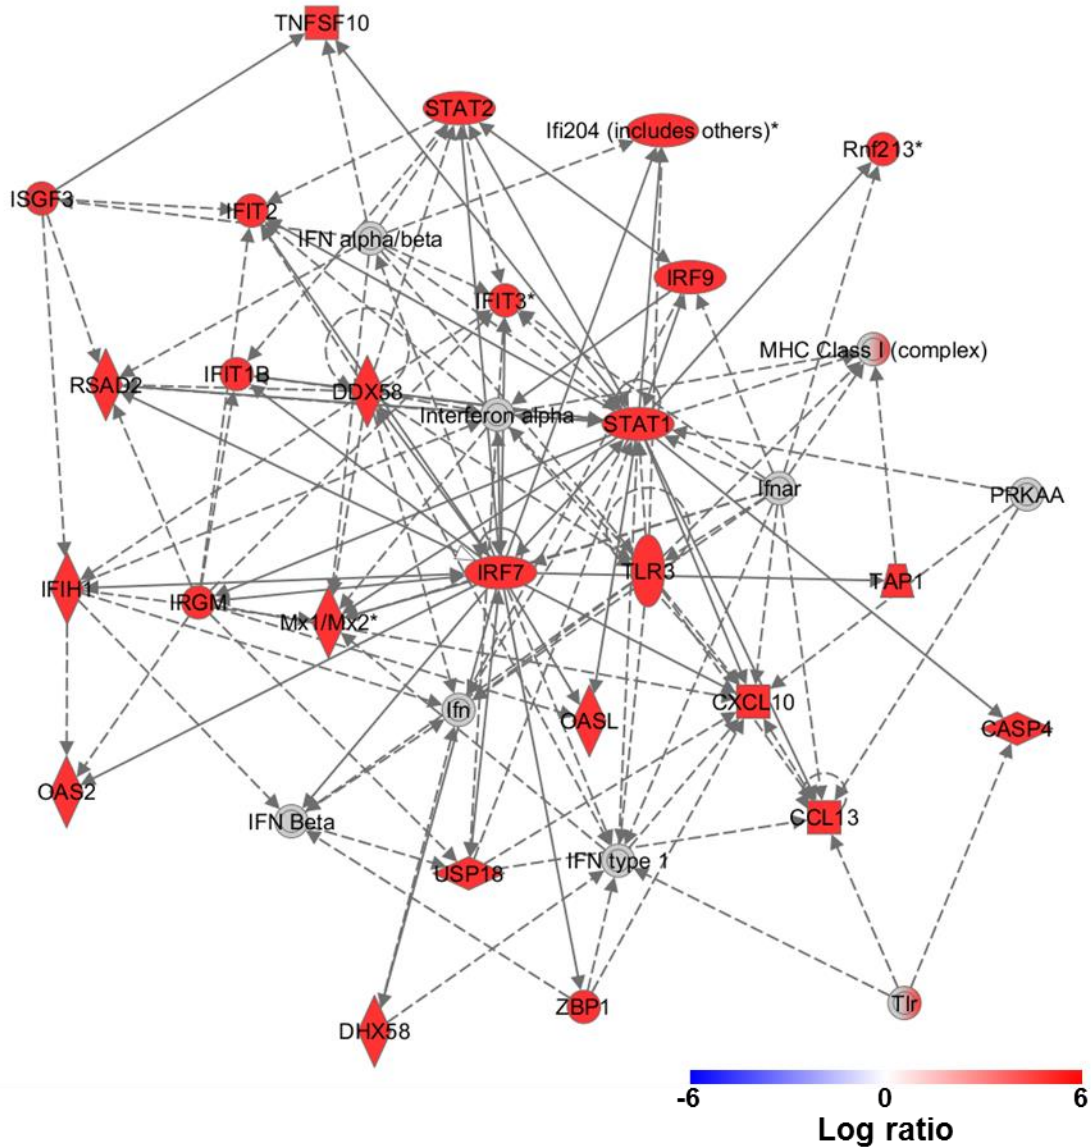

**Online Figure 7.** The network associated with ‘Infectious Disease’, ‘Antimicrobial Response’, and ‘Inflammatory Response’. This is the top network listed on Ingenuity Pathway Analysis® (IPA) on 4 dpi. Red nodes indicate genes upregulated in the hearts of TMEV-infected mice compared with control mice. Gray nodes indicate genes whose expression levels were less than 2-fold or *P* values were more than 0.05. *P* values were determined comparing the signal values of each probe between five samples from infected mice and five samples from age-matched controls, using Student *t* test.

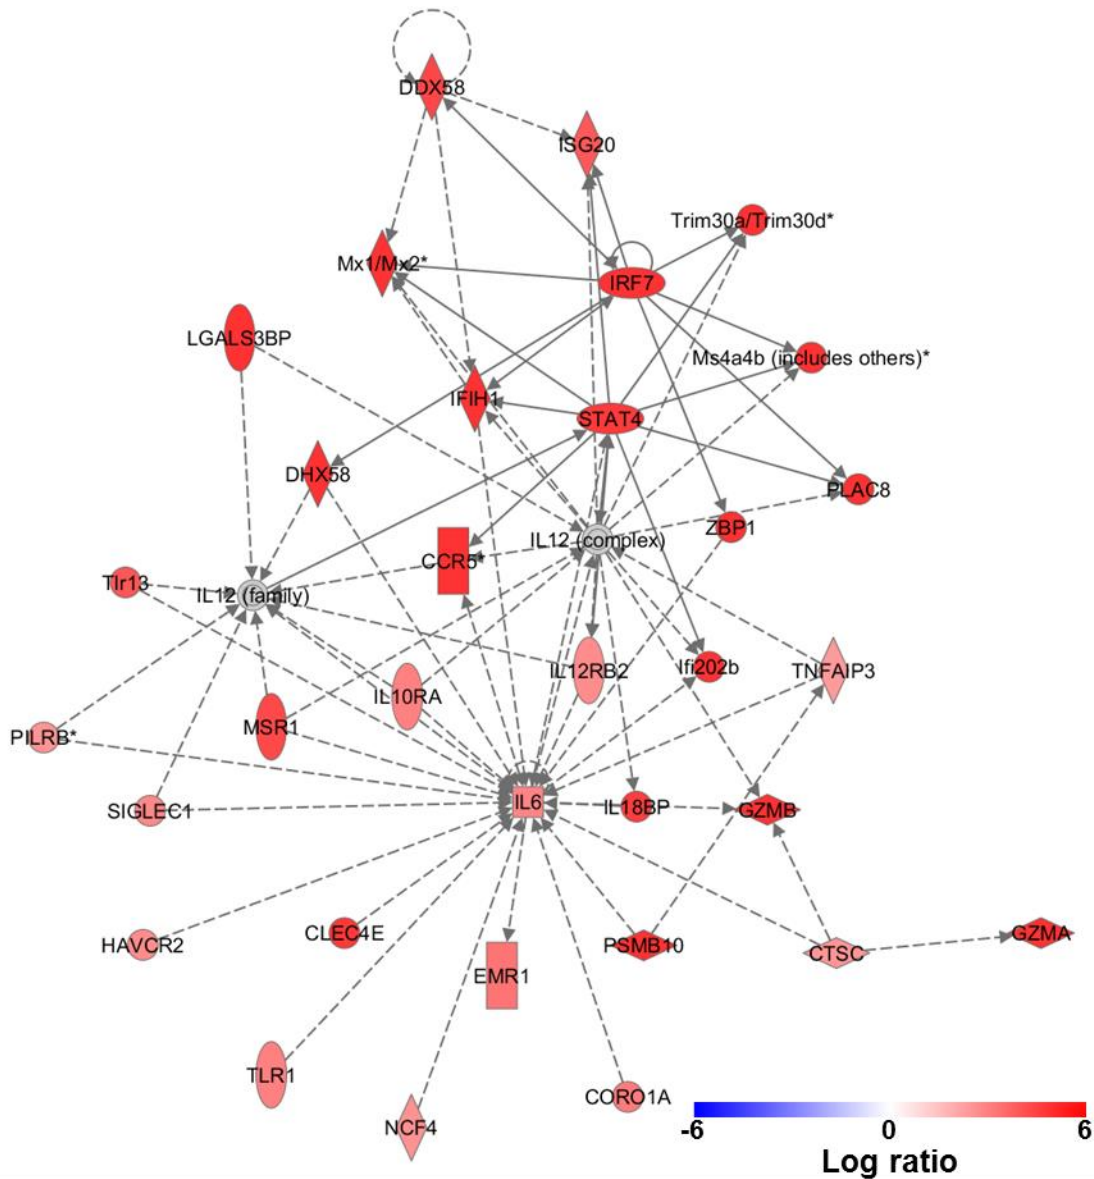

**Online Figure 8.** The network associated with ‘Infectious Disease’, ‘Cellular Function and Maintenance’, and ‘Antimicrobial Response’. This is the top network listed on IPA on 7 dpi. Red nodes indicate genes upregulated in the hearts of TMEV-infected mice compared with control mice. Gray nodes indicate genes whose expression levels were less than 2-fold or  $P$  values were more than 0.05.  $P$  values were determined comparing the signal values of each probe between five samples from infected mice and five samples from age-matched controls, using Student  $t$  test.

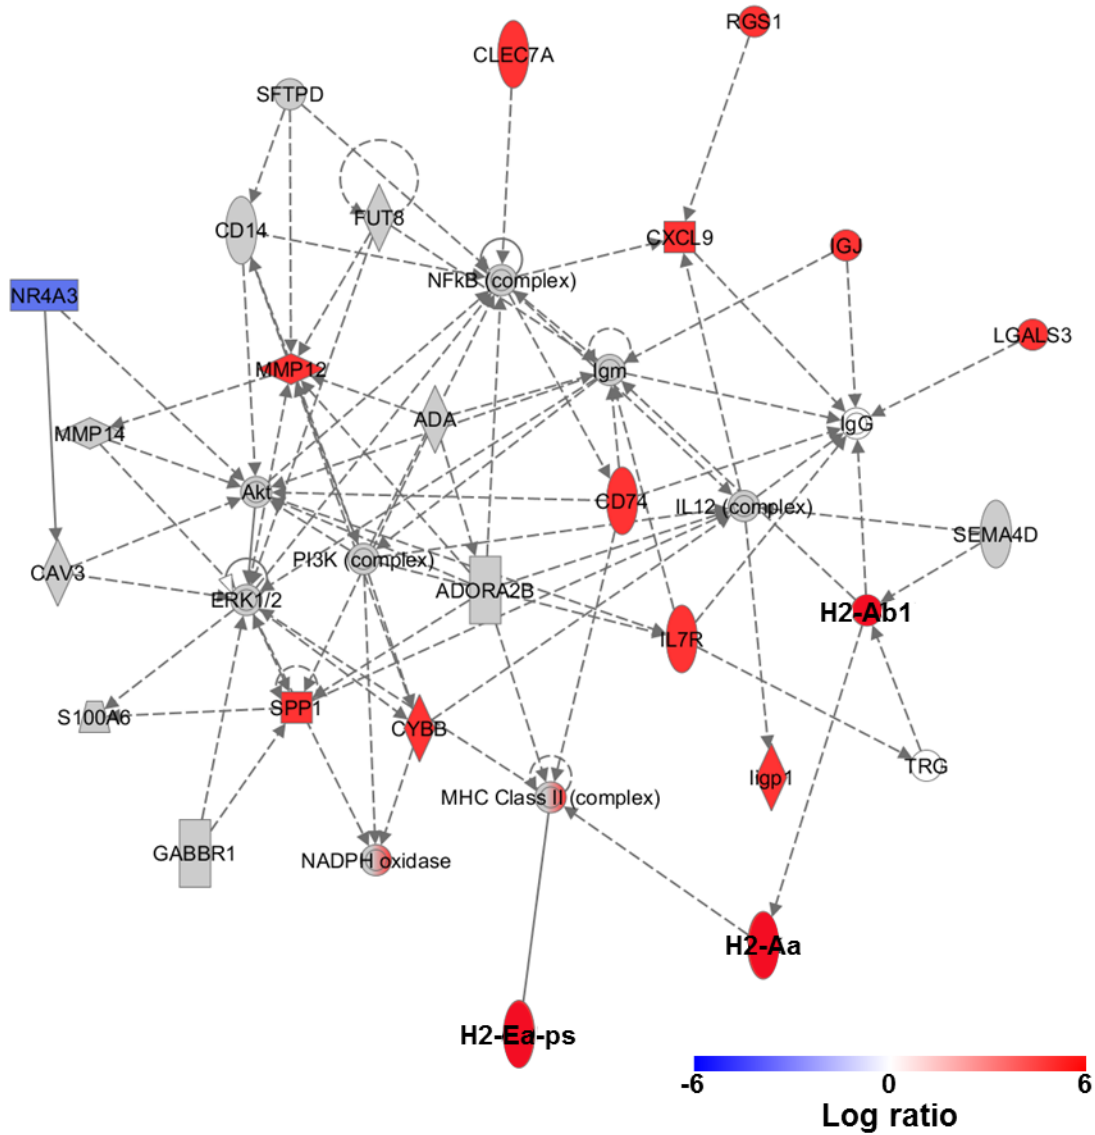

**Online Figure 9.** The network associated with ‘Cellular Function and Maintenance’, ‘Inflammatory Response’, and ‘Cellular Movement’. This is the top network listed on IPA on 60 dpi. Red nodes indicate genes upregulated in the hearts of TMEV-infected mice compared with control mice. Blue nodes indicate downregulated genes. Gray nodes indicate genes whose expression levels were less than 2-fold or *P* values were more than 0.05. *P* values were determined comparing the signal values of each probe between five samples from infected mice and five samples from age-matched controls, using Student *t* test.

### A. 4 dpi

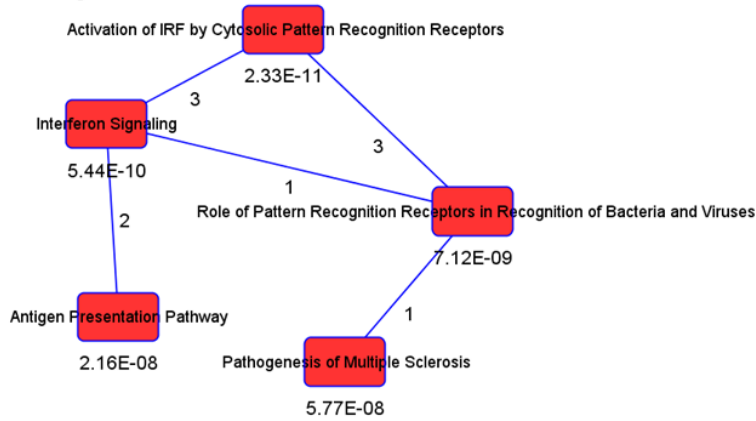

### B. 7 dpi

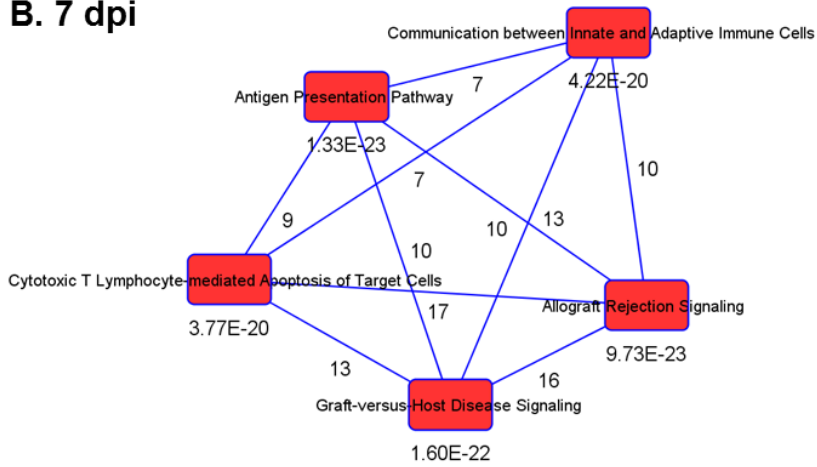

### C. 60 dpi

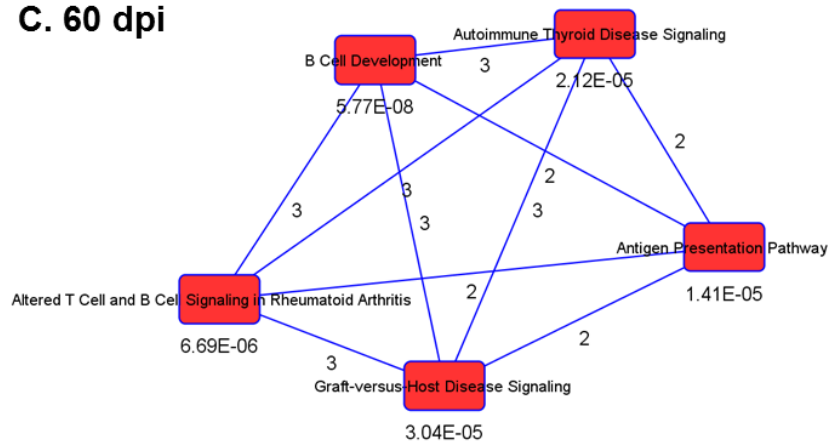

**Online Figure 10.** The top 5 canonical pathways ranked by IPA on 4 (A), 7 (B), and 60 dpi (C). The numbers on the lines indicate the number of overlapped genes between two pathways. The values under the nodes indicate *P* values calculated by Fisher's Exact Test.
